# Supplementary material for: TAK1 inhibition attenuates both inflammation and fibrosis in experimental pneumoconiosis
Source: PubMed Central journal article supplement (PMC5504492; doi:10.1038/celldisc.2017.23), 2017-07-11
Supplement: celldisc201723-s1.pdf [file celldisc201723-s1.pdf]

**A**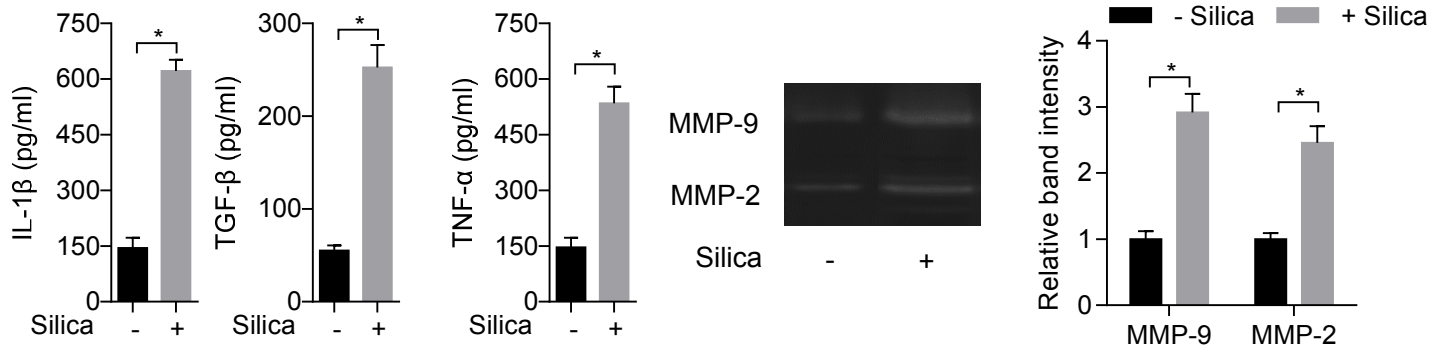**B**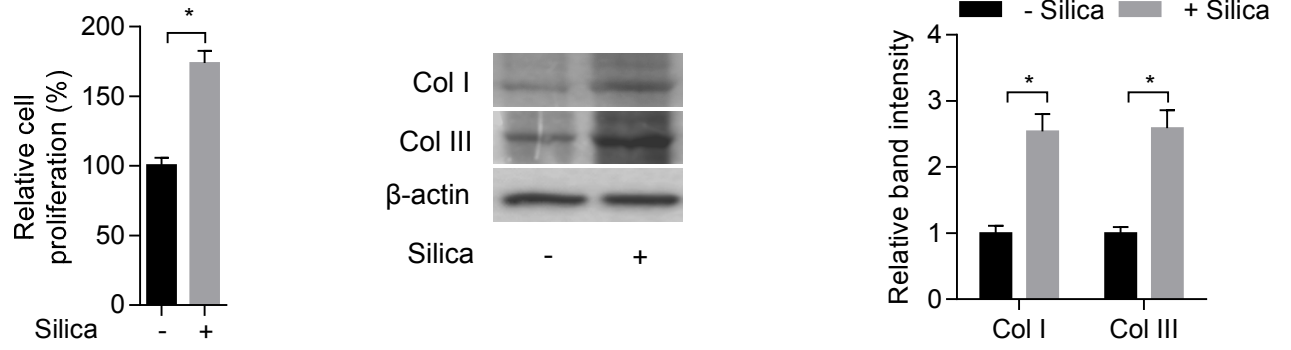

**Supplementary Figure S1 Inflammatory and fibrotic response in primary alveolar macrophages and fibroblasts, respectively** **(A)** Levels of inflammatory cytokines (IL-1 $\beta$ , TGF- $\beta$  and TNF- $\alpha$ ) examined by ELISA (left) and MMPs (MMP-9 and MMP-2) analyzed by gelatin zymography (middle: representative images; right: relative bands intensity) in primary alveolar macrophages isolated from rats with (n = 5) or without silica-exposure (n = 5). **(B)** Cell proliferation rate examined by MTT assay (left) and collagen subtypes (Col I and Col III) determined by western blotting (middle: representative images; right: relative bands intensity) in primary lung fibroblasts isolated from rats with (n = 5) or without silica-exposure (n = 5). Data are presented as mean  $\pm$  s.d. \**P* < 0.05. One-way analysis of variance (ANOVA) with a *post-hoc* test was performed and the statistical differences between the two groups were determined by the Student's *t* test.

**A**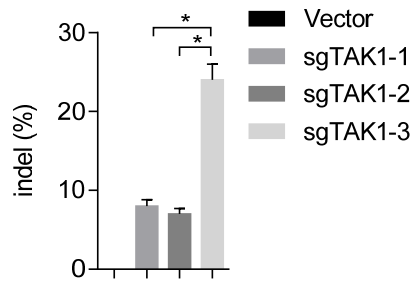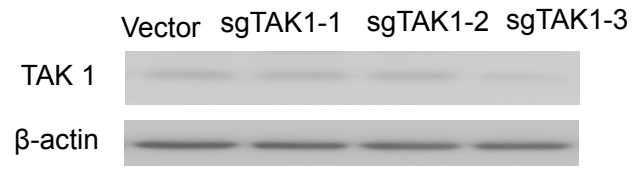**B**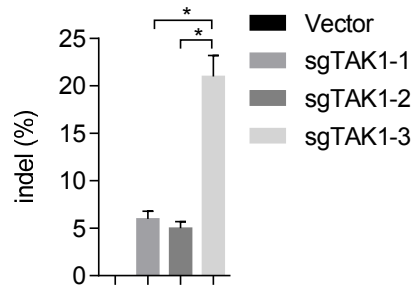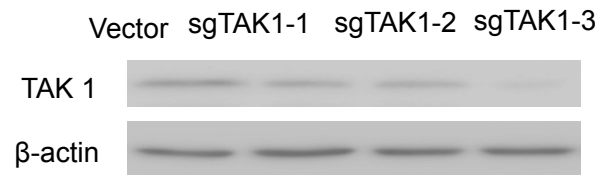**C**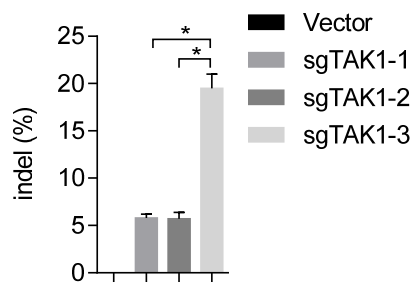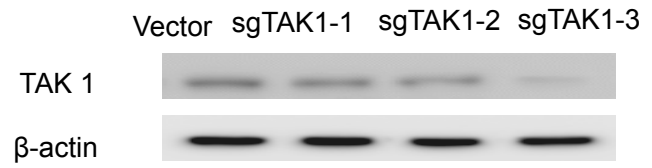

**Supplementary Figure S2 TAK1 gene knockdown efficiency of lentiviruses expressing CRISPR/Cas9 systems** (A) SURVEYOR assay (left) and western blotting (right) to determine the TAK1 knockdown efficiency of different CRISPR/Cas9 systems in primary alveolar macrophages *in vitro*. (B) SURVEYOR assay (left) and western blotting (right) to determine the TAK1 knockdown efficiency of different CRISPR/Cas9 systems in primary lung fibroblasts *in vitro*. (C) SURVEYOR assay (left) and western blotting (right) to determine the TAK1 knockdown efficiency of different CRISPR/Cas9 systems in lung tissues *in vivo*. The lentiviruses were intratracheally delivered into C57BL/6 mouse lungs once a week. Four weeks of post-infection, TAK1 knockdown efficiency were determined by SURVEYOR and western blotting. n = 6 per group. Data are presented as mean  $\pm$  s.d. \* $P < 0.05$  vs corresponding group. One-way analysis of variance (ANOVA) with a post-hoc test was performed and the statistical differences between the two groups were determined by the Student's t test.

**A**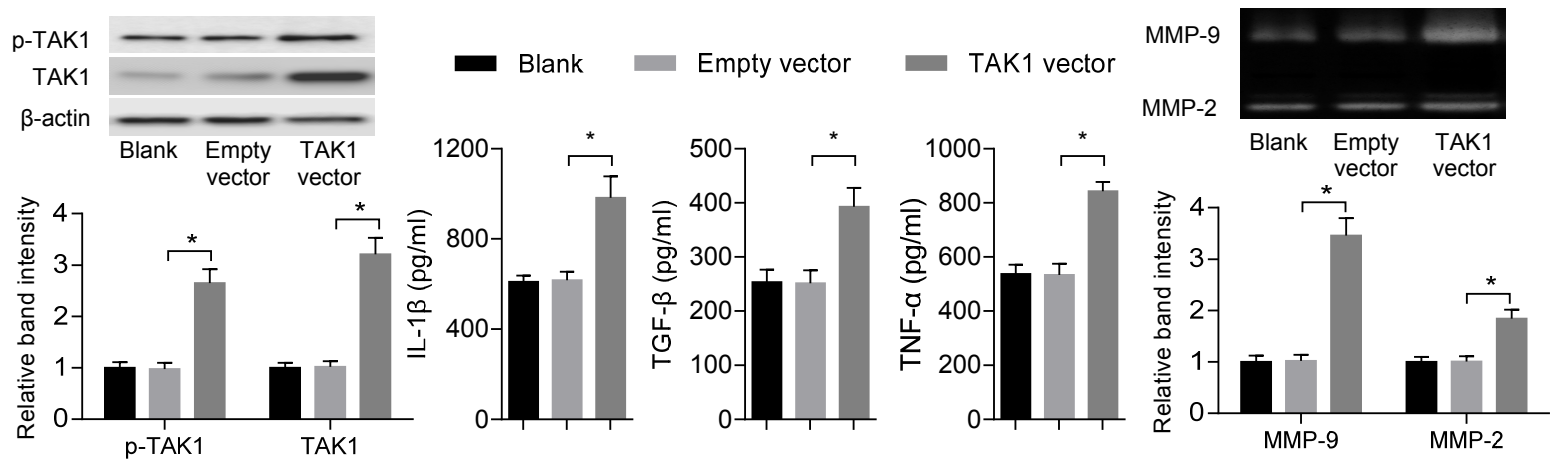**B**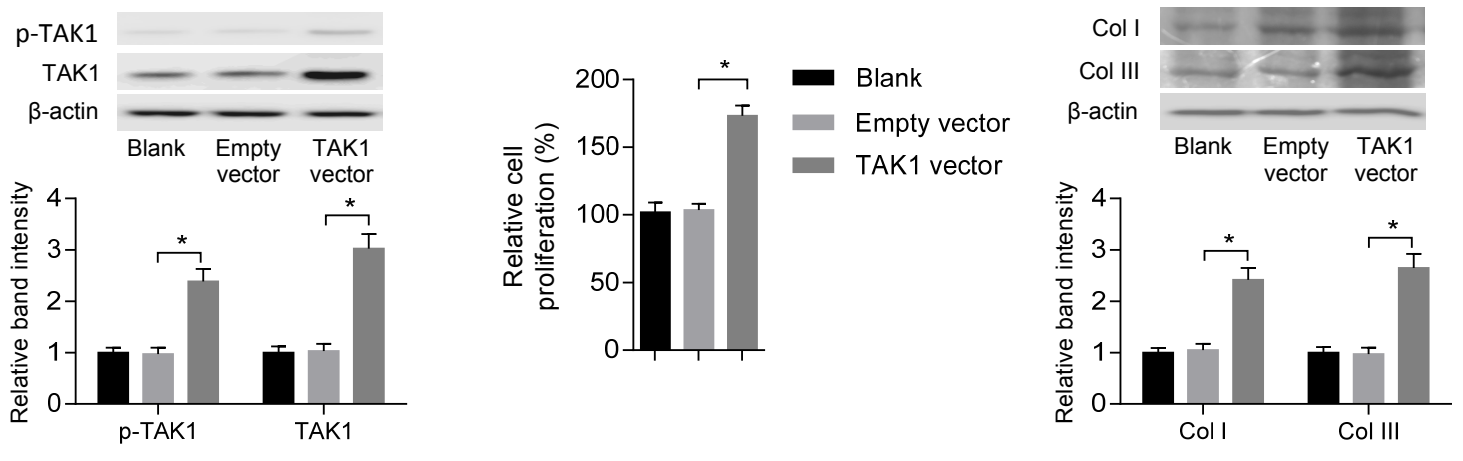

**Supplementary Figure S3 *In vitro* effects of TAK1 overexpression on inflammation and fibrosis (A)**

Levels of p-TAK1 and TAK1 determined by western blotting (left upper: representative images; left bottom: relative bands intensity), inflammatory cytokines (IL-1 $\beta$ , TGF- $\beta$  and TNF- $\alpha$ ) examined by ELISA (middle) and MMPs (MMP-9 and MMP-2) analyzed by gelatin zymography (right upper: representative images; right bottom: relative bands intensity) in primary alveolar macrophages with incubation of empty vector or expression vector for TAK1 (TAK1 vector). Primary alveolar macrophages were isolated from silica-exposed rats. **(B)** Levels of p-TAK1 and TAK1 determined by western blotting (left upper: representative images; left bottom: relative bands intensity), cell proliferation rate examined by MTT assay (middle) and collagen subtypes (Col I and Col III) determined by western blotting (right upper: representative images; right bottom: relative bands intensity) in primary lung fibroblasts with incubation of empty vector or expression vector for TAK1 (TAK1 vector). Primary lung fibroblasts were isolated from silica-exposed rats. Data are presented as mean  $\pm$  s.d. \* $P < 0.05$ , n = 5 per group. One-way analysis of variance (ANOVA) with a *post-hoc* test was performed and the statistical differences between the two groups were determined by the Student's *t* test.

**A**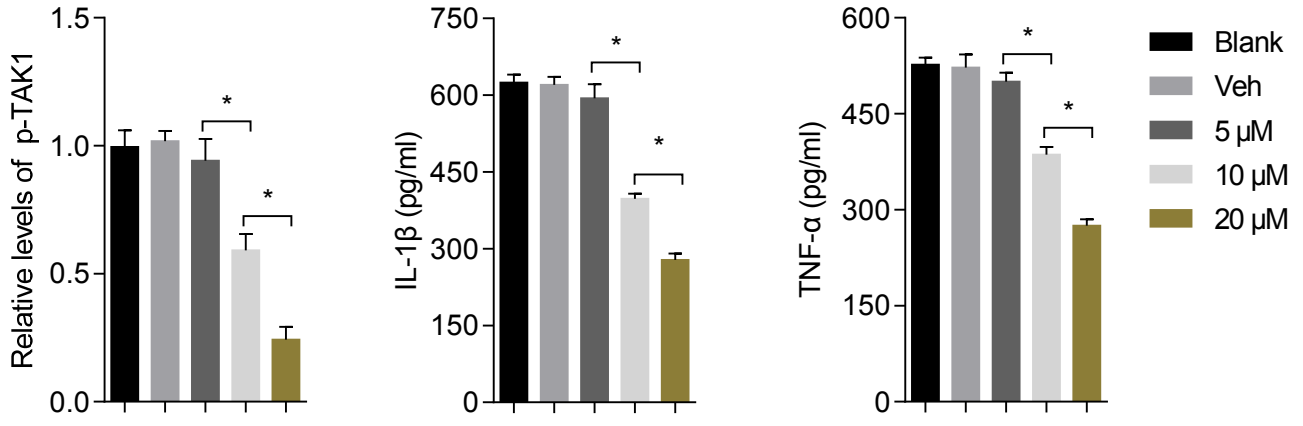**B**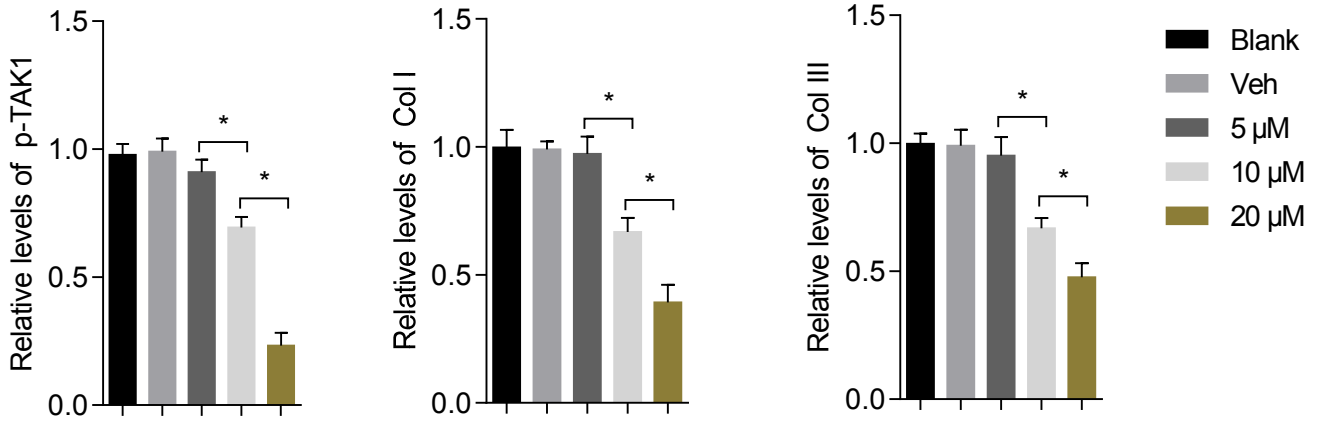**C**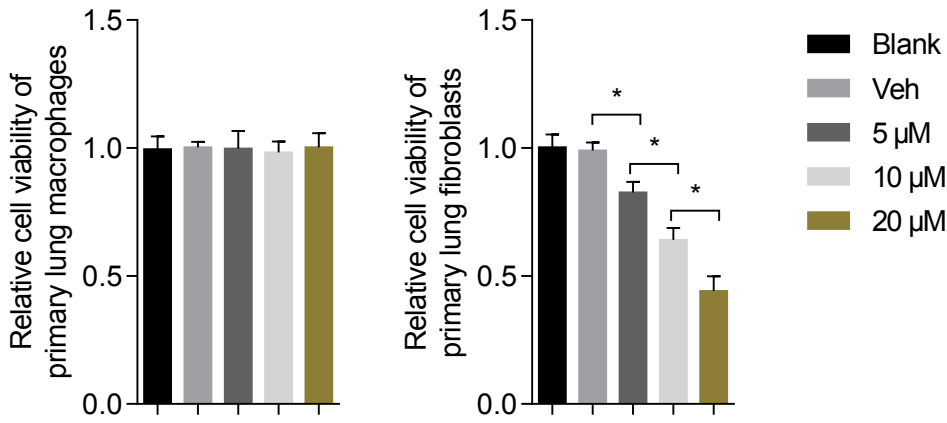

**Supplementary Figure S4 *In vitro* effects of TAK1 inhibitor 5Z-7-oxozeaenol on inflammation and fibrosis and cytotoxicity** (A) ELISA to examine levels of p-TAK1 and supernatant inflammatory cytokines (IL-1 $\beta$  and TNF- $\alpha$ ) in primary alveolar macrophages with incubation of vehicle control (Veh: DMSO) or TAK1 inhibitor 5Z-7-oxozeaenol at concentrations of 5, 10 and 20  $\mu$ M, respectively. Primary alveolar macrophages were isolated from silica-exposed rats. (B) ELISA to examine levels of p-TAK1 and collagen subtypes (Col I and Col III) in primary lung fibroblasts with incubation of vehicle control (Veh: DMSO) or TAK1 inhibitor 5Z-7-oxozeaenol at concentrations of 5, 10 and 20  $\mu$ M, respectively. Primary lung fibroblasts were isolated from silica-exposed rats. (C) MTT assay to examine cytotoxicity of primary alveolar macrophages and lung fibroblasts with incubation of vehicle control (Veh: DMSO) or TAK1 inhibitor 5Z-7-oxozeaenol at concentrations of 5, 10 and 20  $\mu$ M, respectively. Primary alveolar macrophages and lung fibroblasts were isolated from healthy rats. Data are presented as mean  $\pm$  s.d. \* $P$  < 0.05, n = 5 per group. One-way analysis of variance (ANOVA) with a *post-hoc* test was performed and the statistical differences between the two groups were determined by the Student's  $t$  test.



**A**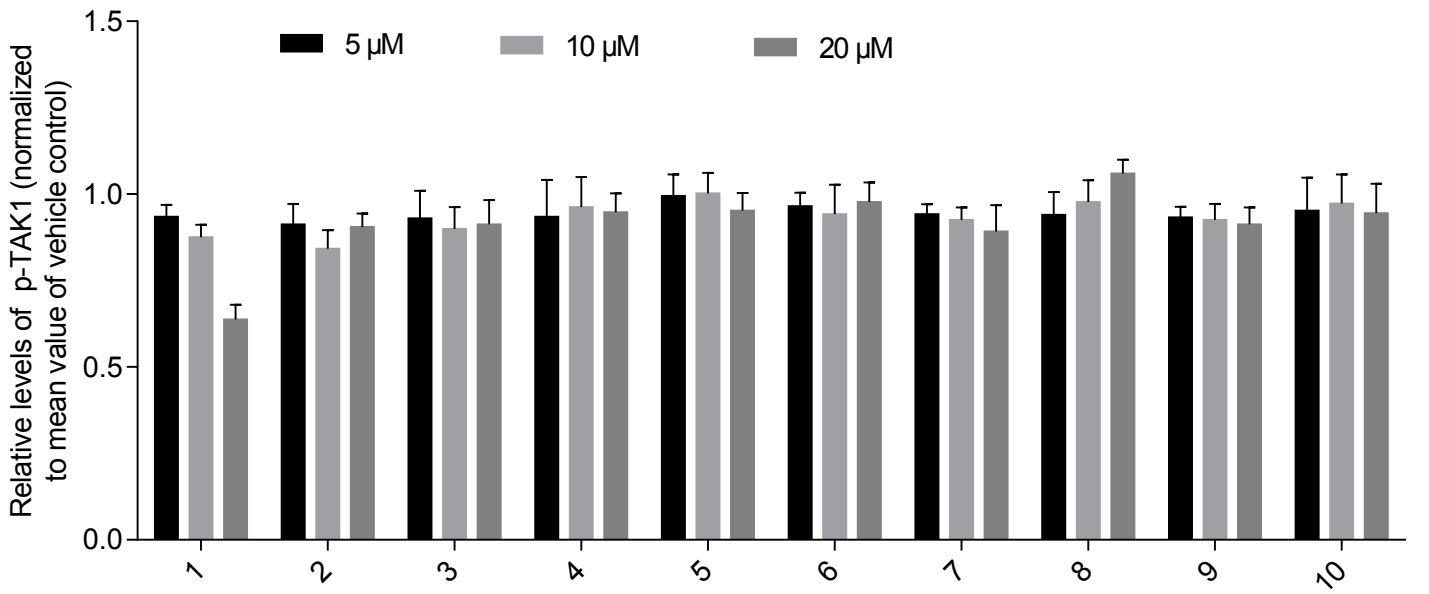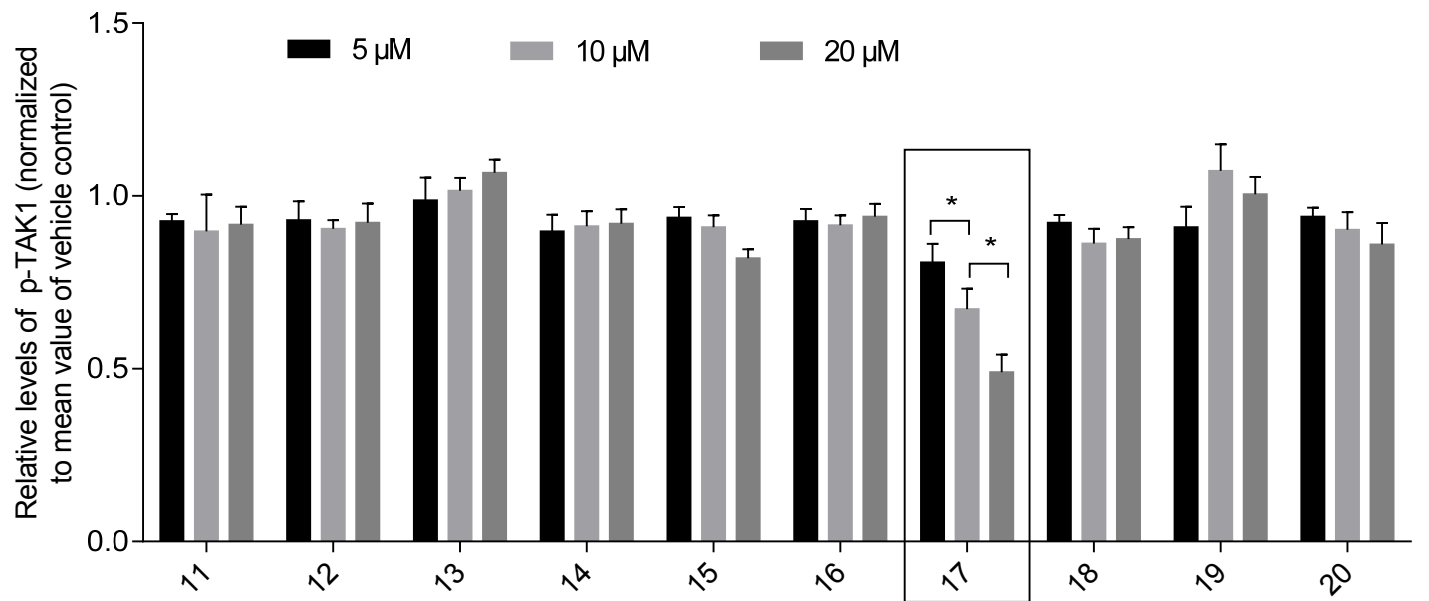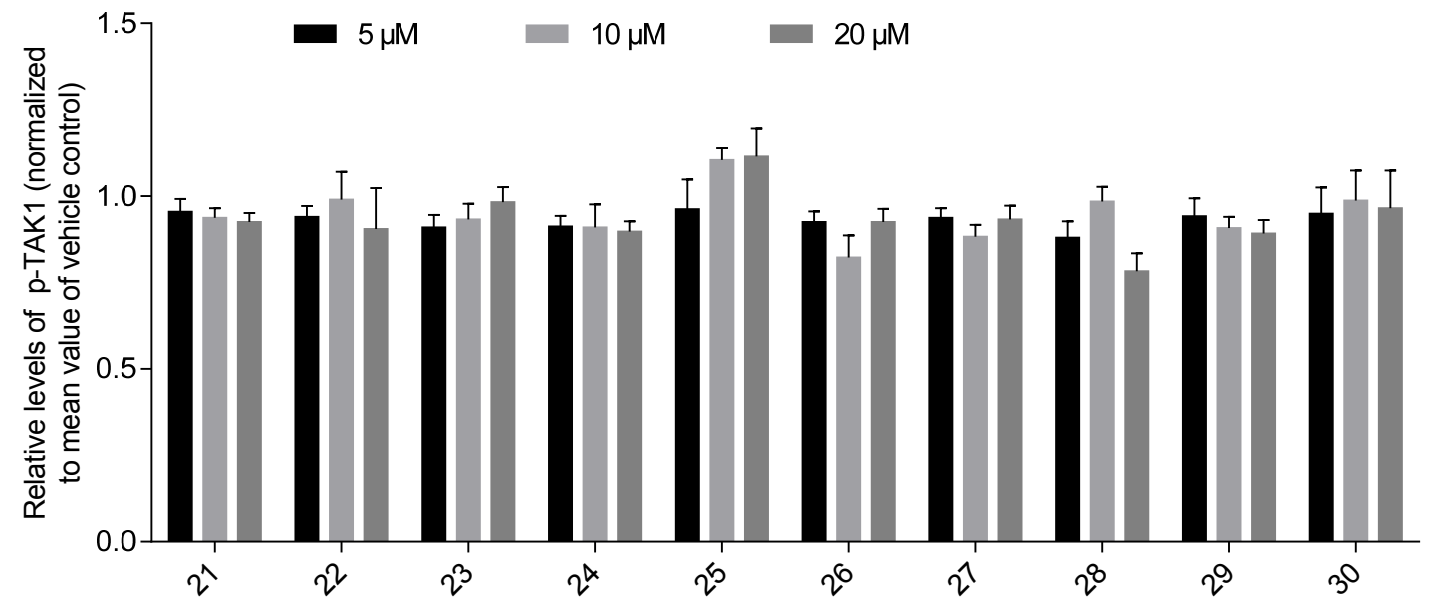

**B**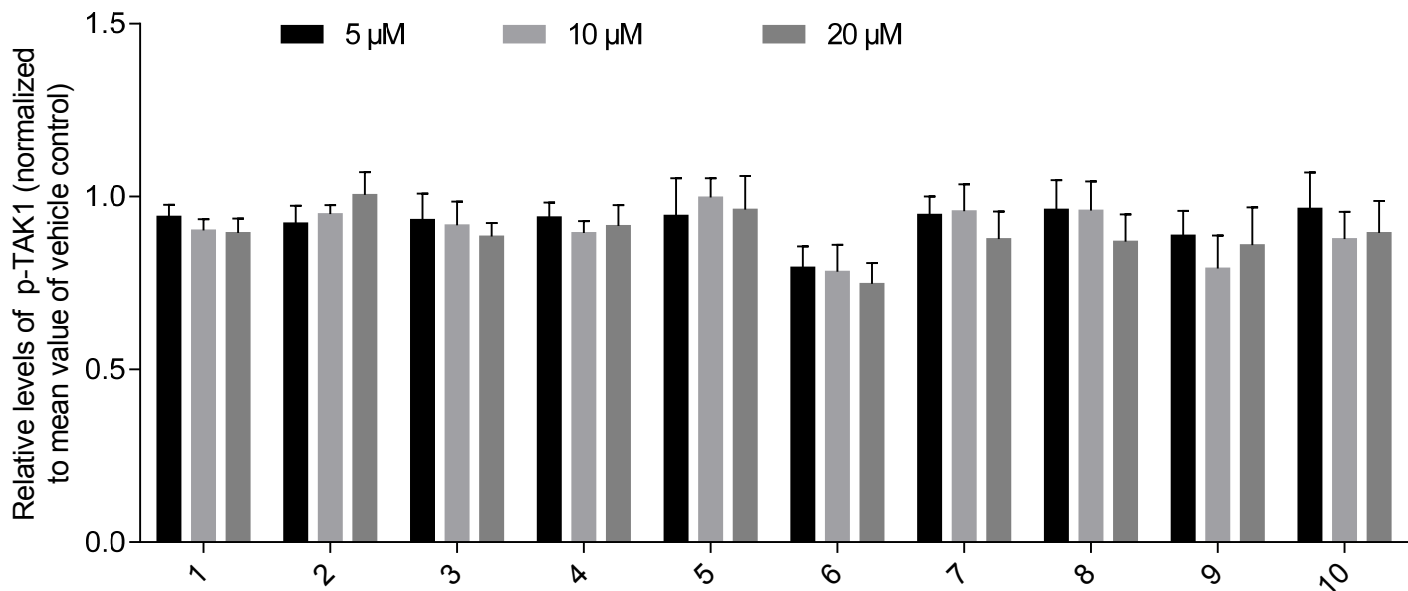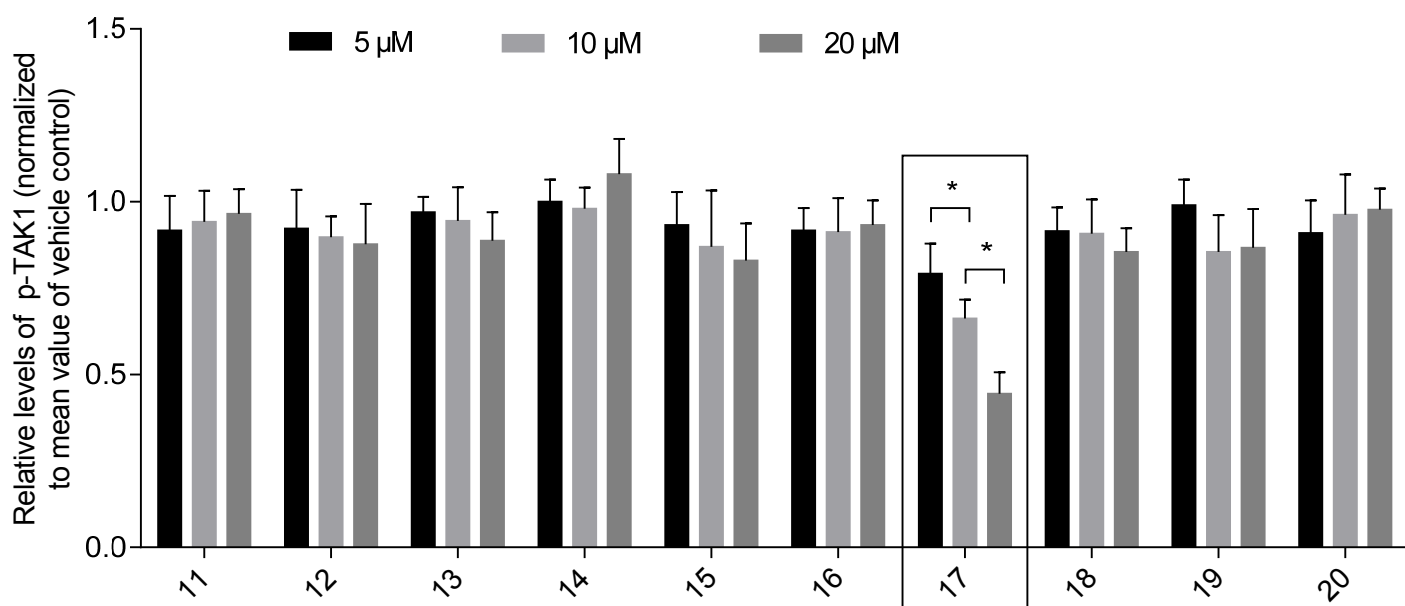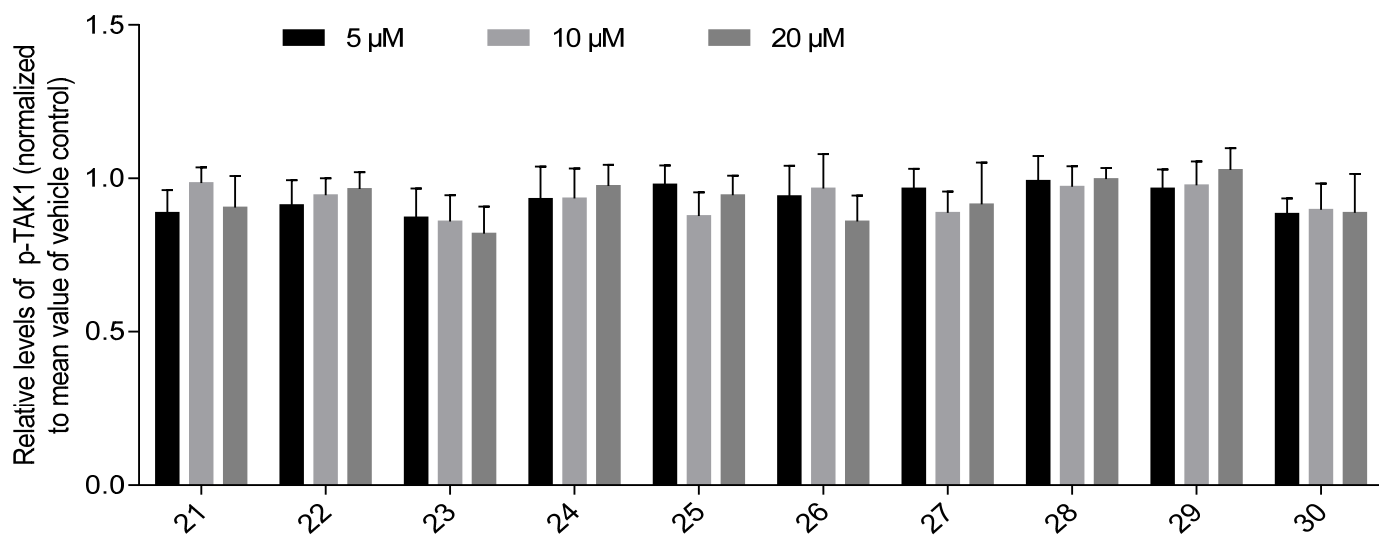

**C**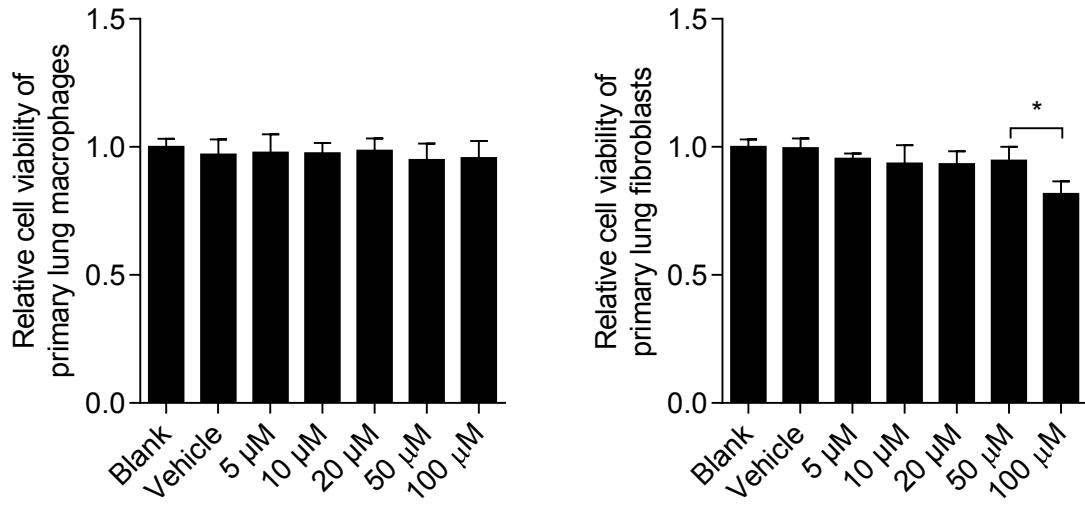**D**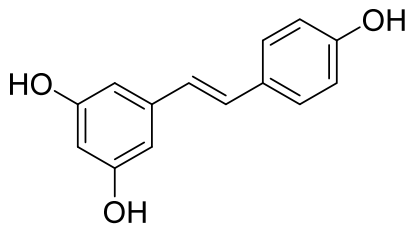**E**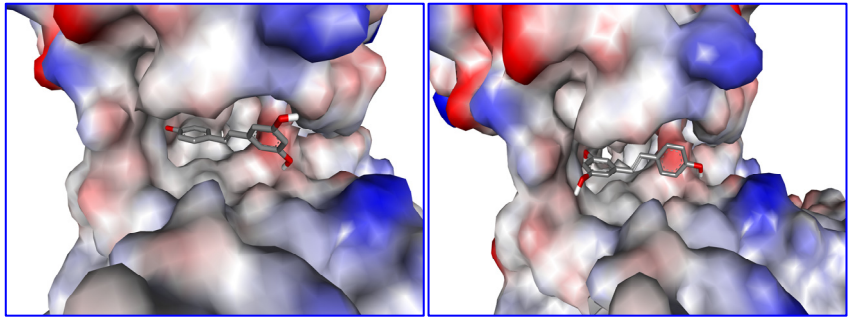

**Supplementary Figure S5 Screening of TAK1 small molecule inhibitors (A)** ELISA to examine levels of p-TAK1 in primary alveolar macrophages with incubation of vehicle control (DMSO) or 30 TAK1 inhibitor candidates at concentrations of 5, 10 and 20  $\mu\text{M}$ , respectively. Primary alveolar macrophages were isolated from silica-exposed rats. **(B)** ELISA to examine levels of p-TAK1 in primary lung fibroblasts with incubation of vehicle control (DMSO) or 30 TAK1 inhibitor candidates at concentrations of 5, 10 and 20  $\mu\text{M}$ , respectively. Primary lung fibroblasts were isolated from silica-exposed rats. **(C)** MTT assay to examine cytotoxicity of primary alveolar macrophages and lung fibroblasts with incubation of vehicle control (DMSO) or resveratrol at concentrations of 5, 10 and 20  $\mu\text{M}$ , respectively. Primary alveolar macrophages and lung fibroblasts were isolated from healthy rats. **(D)** Formula of resveratrol. **(E)** Close-up view showing the predicted two conformations between TAK1 and resveratrol with low binding free energies (left: -6.46; right: -6.03) in molecular docking. Data are presented as mean  $\pm$  s.d. \* $P < 0.05$ ,  $n = 5$  per group. One-way analysis of variance (ANOVA) with a *post-hoc* test was performed and the statistical differences between the two groups were determined by the Student's *t* test.

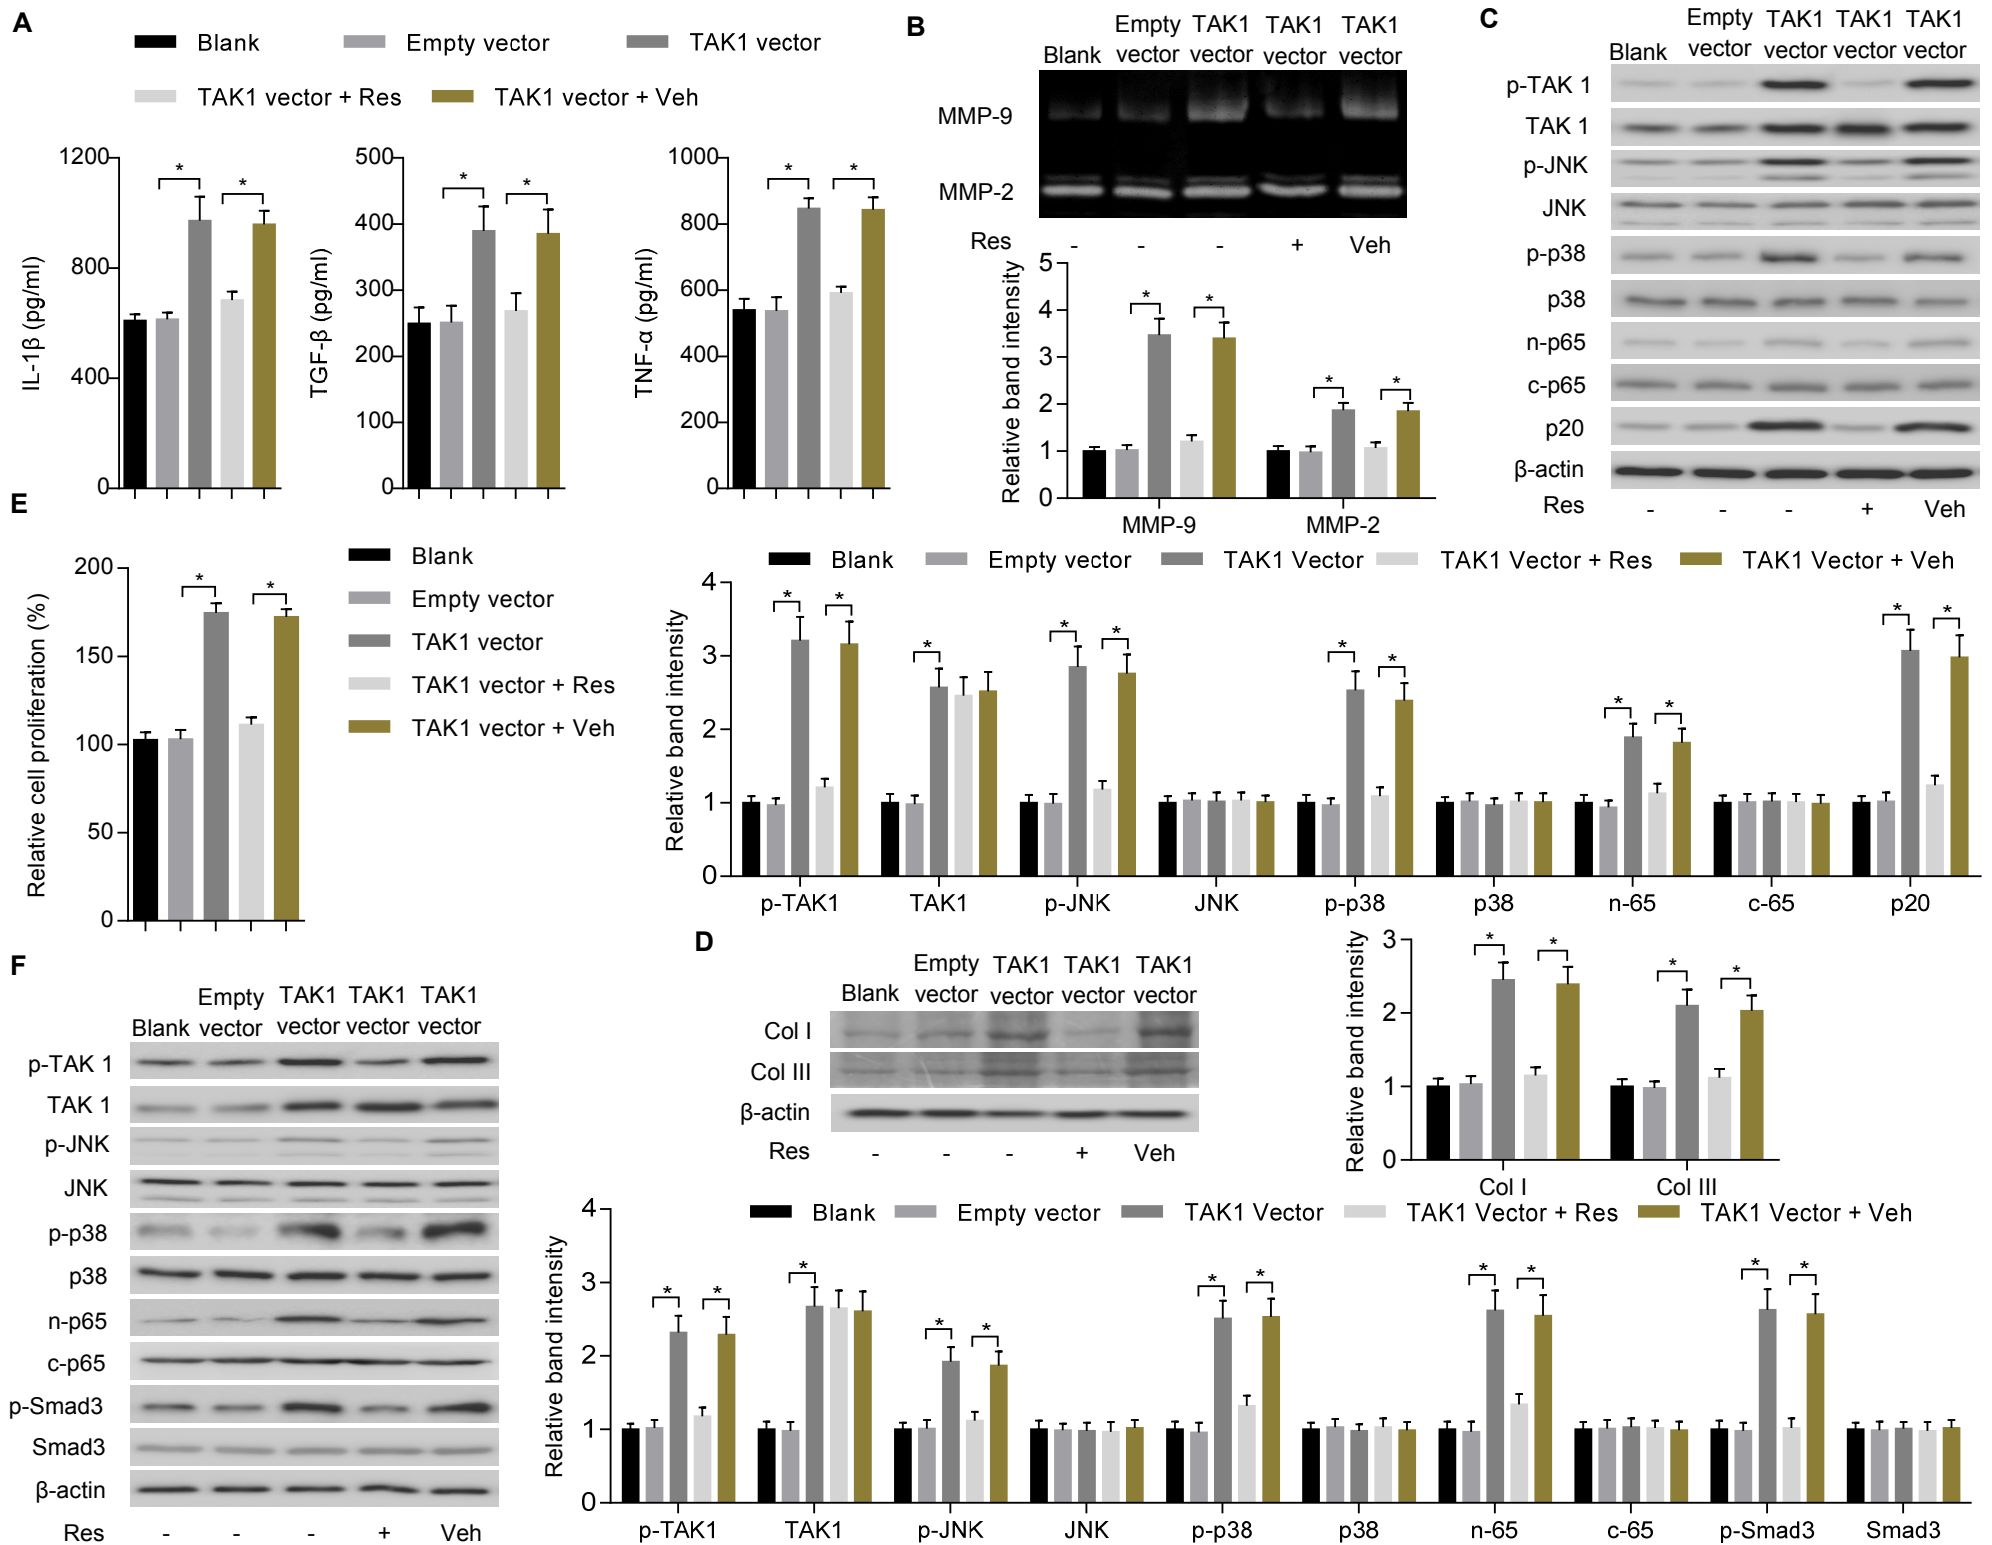

**Supplementary Figure S6 *In vitro* effects of resveratrol on TAK1 overexpression-aggravated inflammation and fibrosis** (A) ELISA to examine levels of IL-1 $\beta$  (left), TGF- $\beta$  (middle) and TNF- $\alpha$  (right) in supernatant of TAK1-overexpressed primary alveolar macrophages with treatment of 100  $\mu$ M resveratrol (Res) or vehicle control (Veh). (B) Gelatin zymography (upper: representative images; bottom: relative bands intensity) to examine activities of matrix metalloproteinases (MMP-9 and MMP-2) in TAK1-overexpressed primary alveolar macrophages with treatment of 100  $\mu$ M resveratrol (Res) or vehicle control (Veh). (C) Western blotting (upper: representative images; bottom: relative bands intensity) to examine TAK1 activation (p-TAK1) and inflammation-related downstream signaling in TAK1-overexpressed primary alveolar macrophages with treatment of 100  $\mu$ M resveratrol (Res) or vehicle control (Veh). (D) Western blotting (left: representative images; right: relative bands intensity) to determine levels of Col I and Col III in TAK1-overexpressed primary lung fibroblasts with treatment of 50  $\mu$ M resveratrol (Res) or vehicle control (Veh). (E) MTT assay to examine cell proliferation rate of TAK1-overexpressed primary lung fibroblasts with treatment of 50  $\mu$ M resveratrol (Res) or vehicle control (Veh). (F) Western blotting (left: representative images; right: relative bands intensity) to examine TAK1 activation (p-TAK1) and fibrosis-related downstream signaling in TAK1-overexpressed primary lung fibroblast with treatment of 50  $\mu$ M resveratrol (Res) or vehicle control (Veh). Primary alveolar macrophages and lung fibroblasts were isolated from silica-exposed rats. Vector: pcDNA3.1 empty vector; Vector-TAK1: pcDNA3.1-based expression vector for TAK1. Data are presented as mean  $\pm$  s.d. \* $P$  < 0.05, n = 4 per group. One-way analysis of variance (ANOVA) with a *post-hoc* test was performed and the statistical differences between the two groups were determined by the Student's *t* test.

**A**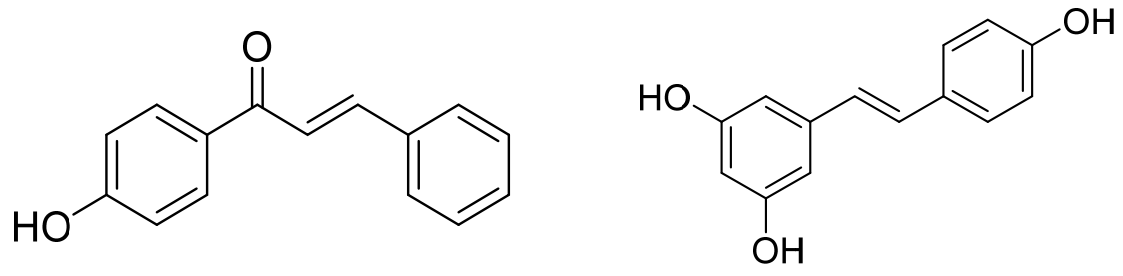**B**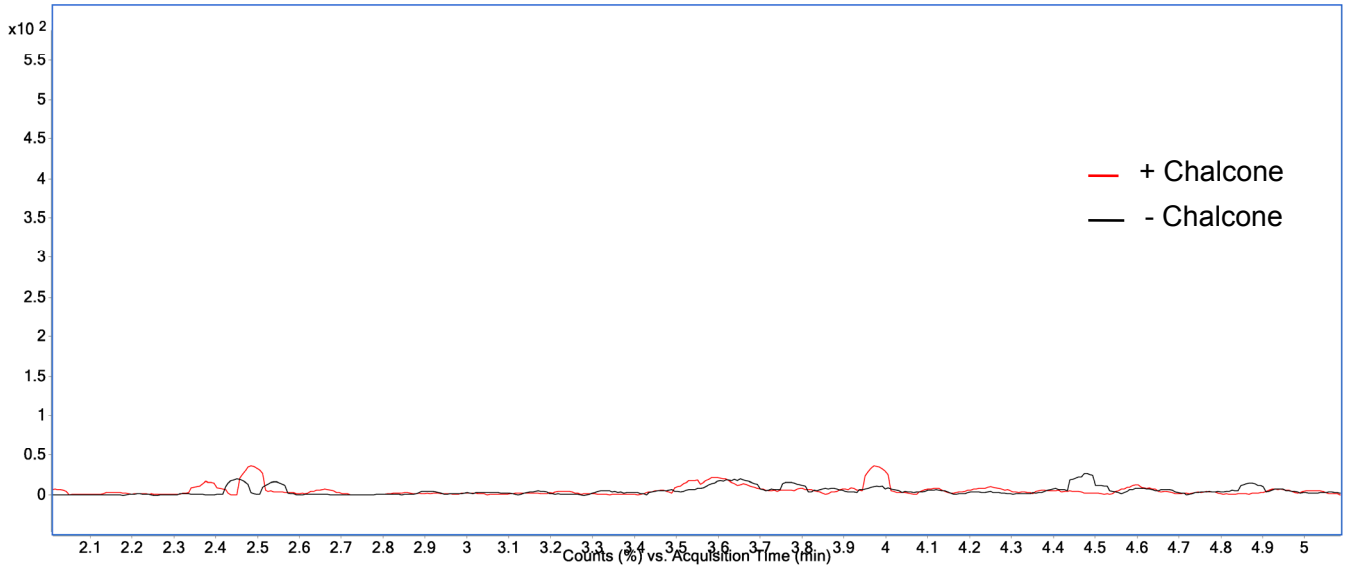**C**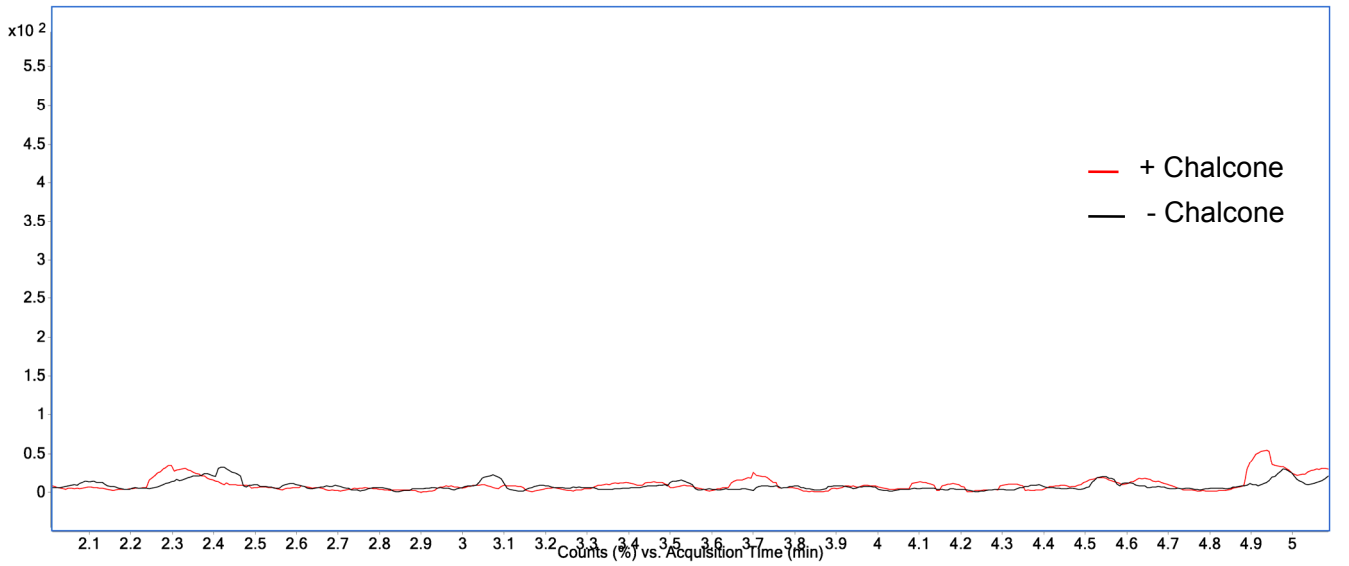

**Supplementary Figure S7 Binding assay of chalcone derivative with TAK1 by immunoprecipitation followed with LC-MS/MS** (A) Formula of chalcone derivative (4'-hydroxychalcone) (left) and resveratrol (right). (B) Immunoprecipitation using anti-TAK1 antibody to examine the interaction between chalcone derivative (4'-hydroxychalcone) and TAK1 in NR8383 cells. (C) Immunoprecipitation using anti-TAK1 antibody to examine the interaction between chalcone derivative (4'-hydroxychalcone) and TAK1 in WI-38 cells. Chalcone derivative (4'-hydroxychalcone) in immunoprecipitate was examined by LC-MS/MS. Chalcone: chalcone derivative (4'-hydroxychalcone). Experiments were performed three times.



**A**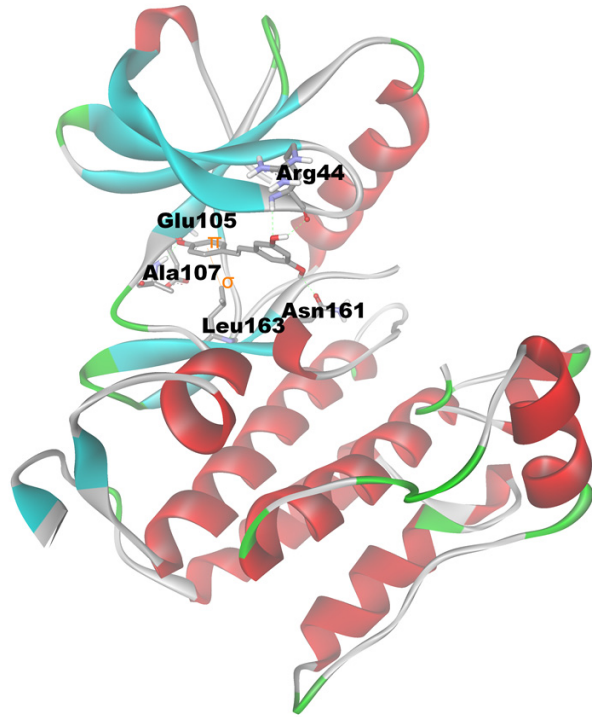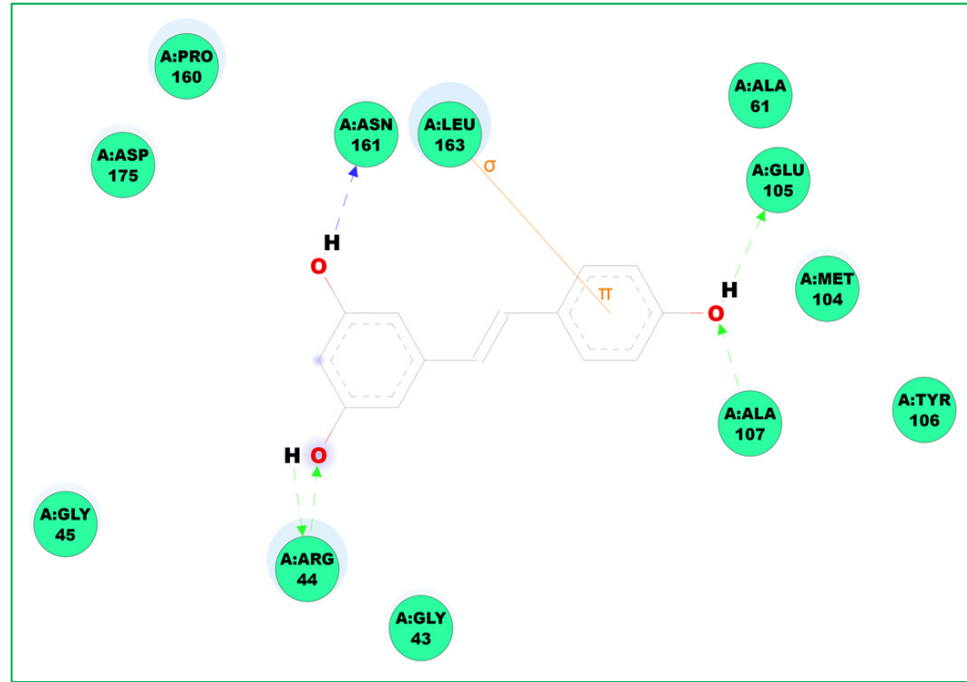**B**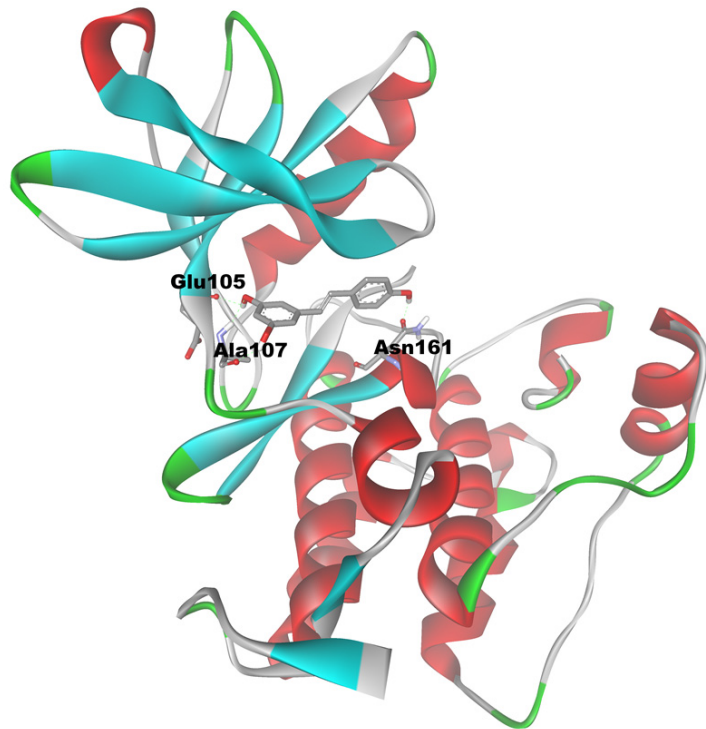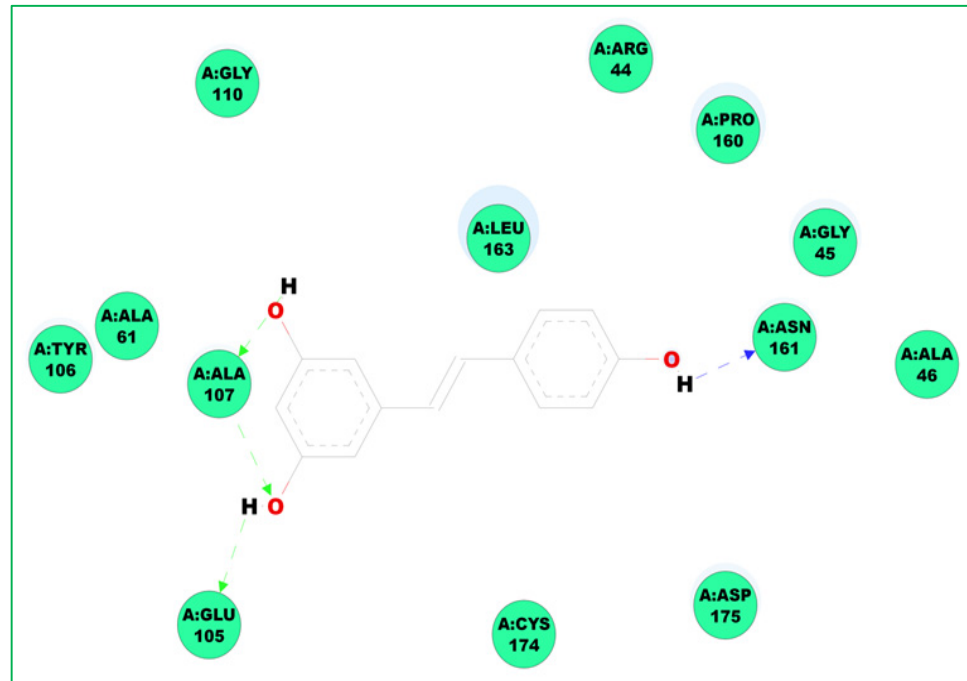

**Supplementary Figure S8 Key residues involved in interaction between TAK1 and resveratrol determined by molecular docking (A)** 3D (left) and 2D (right) models showing key residues in one predicted binding confirmation between resveratrol and TAK1. **(B)** 3D (left) and 2D (right) models showing key residues in another predicted binding confirmation between resveratrol (in opposite orientation) and TAK1.

**A**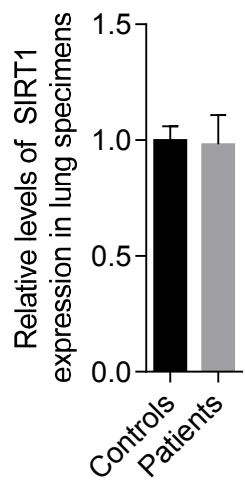**B**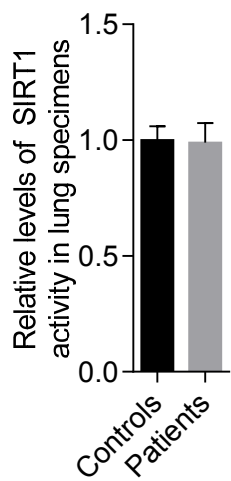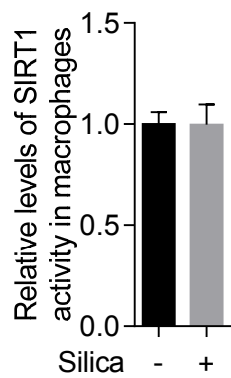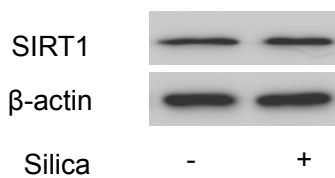**C**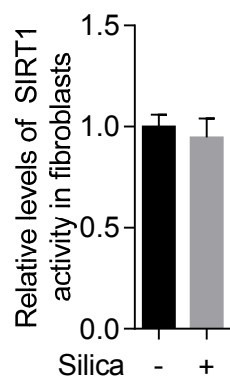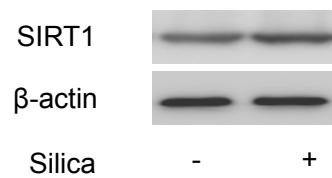

**Supplementary Figure S9 Expression and activity of Sirtuin 1 (SIRT1) in pneumoconiosis (A)**

Relative levels of SIRT1 expression and activity in lung specimens from pneumoconiosis patients (n = 9) or control individuals (n = 6). Levels of SIRT1 expression determined by Enzyme-linked immunosorbent assay (ELISA) and SIRT1 activity determined by a commercial kit in lung specimens from pneumoconiosis patients were normalized to their mean value in lung specimens from control individuals, respectively. **(B)** Levels of SIRT1 expression determined by western blotting and SIRT1 activity determined by a commercial kit in primary alveolar macrophages isolated from rats with (n = 5) or without silica-exposure (n = 5). **(C)** Levels of SIRT1 expression determined by western blotting and SIRT1 activity determined by a commercial kit in primary lung fibroblasts isolated from rats with (n = 5) or without silica-exposure (n = 5). Level of SIRT1 activity in primary alveolar macrophages or fibroblasts isolated from rats with silica-exposure was normalized to that in primary alveolar macrophages or fibroblasts isolated from rats without silica-exposure. Data are presented as mean  $\pm$  s.d. Student's *t* test was performed to determine the statistical differences between the two groups.

**Supplementary Table S1 Aberrantly expressed genes in silica-exposed NR8383 cells**

| No. | Probe Name    | Gene Symbol | Absolute Fold Change<br>([Silica treatment] vs [Control]) | P-value     | Regulation |
|-----|---------------|-------------|-----------------------------------------------------------|-------------|------------|
| 1   | A_44_P334736  | Edn1        | 60.68303972                                               | 6.6798E-08  | up         |
| 2   | A_44_P371339  | Il6         | 60.16219865                                               | 5.5793E-07  | up         |
| 3   | A_44_P557487  | Cpb2        | 50.06123456                                               | 1.64355E-05 | up         |
| 4   | A_64_P007508  | Csf3        | 49.95123641                                               | 2.89846E-05 | up         |
| 5   | A_64_P021723  | TAK1        | 45.51287314                                               | 2.57853E-05 | up         |
| 6   | A_42_P687186  | Sdc4        | 14.26187652                                               | 2.99942E-06 | up         |
| 7   | A_44_P132610  | Slc20a1     | 12.16127651                                               | 4.17553E-07 | up         |
| 8   | A_64_P182654  | Birc2       | 11.22487543                                               | 2.86193E-05 | up         |
| 9   | A_64_P149139  | Rgs3        | 10.92127687                                               | 0.003793919 | up         |
| 10  | A_42_P515405  | Ier3        | 9.512439871                                               | 0.001663364 | up         |
| 11  | A_44_P335446  | Dusp2       | 9.434234578                                               | 1.02073E-05 | up         |
| 12  | A_64_P126236  | Dbn1        | 9.161265789                                               | 0.001724112 | up         |
| 13  | A_64_P160673  | Tor1aip2    | 9.091898794                                               | 7.97497E-07 | up         |
| 14  | A_64_P031456  | Top1        | 8.562365789                                               | 2.73136E-06 | up         |
| 15  | A_64_P064020  | Fgfr1       | 8.064676516                                               | 0.026801377 | up         |
| 16  | A_42_P597242  | RGD1303142  | 7.932368651                                               | 6.77845E-09 | up         |
| 17  | A_44_P357470  | Bmpr1a      | 7.914657891                                               | 0.000148037 | up         |
| 18  | A_64_P015607  | Chka        | 7.873651908                                               | 3.3146E-07  | up         |
| 19  | A_44_P137802  | Smpd1       | 7.860875761                                               | 2.18743E-05 | up         |
| 20  | A_42_P806899  | Kdm6b       | 7.292109876                                               | 0.002907056 | up         |
| 21  | A_64_P031506  | Tubb3       | 6.983788065                                               | 0.000205973 | up         |
| 22  | A_44_P527556  | Taf7        | 6.801876891                                               | 0.000735284 | up         |
| 23  | A_44_P245775  | RGD1305014  | 6.712312873                                               | 4.63359E-06 | up         |
| 24  | A_64_P014717  | Mllt11      | 6.634218761                                               | 3.70859E-05 | up         |
| 25  | A_64_P057566  | Kcnn4       | 6.470986124                                               | 0.004089239 | up         |
| 26  | A_64_P005193  | Kb21        | 6.412876912                                               | 0.001489889 | up         |
| 27  | A_42_P768978  | Nrp1        | 6.230976514                                               | 0.003907606 | up         |
| 28  | A_64_P101792  | Efnb3       | 6.133276891                                               | 0.003333402 | up         |
| 29  | A_44_P1043157 | Cxcl9       | 6.122198712                                               | 0.00235347  | up         |
| 30  | A_44_P696669  | Ehd1        | 6.081254081                                               | 1.29105E-05 | up         |
| 31  | A_42_P648200  | Pak1ip1     | 6.021298684                                               | 1.62095E-05 | up         |
| 32  | A_64_P035212  | Polr1e      | 5.980898763                                               | 0.000431815 | up         |
| 33  | A_64_P163169  | Begain      | 5.961876901                                               | 0.046328757 | up         |
| 34  | A_42_P727584  | Mapk6       | 5.950876543                                               | 1.57208E-05 | up         |
| 35  | A_44_P224326  | Rnf38       | 5.892098762                                               | 4.50227E-05 | up         |
| 36  | A_64_P024356  | Sh2b2       | 5.664198764                                               | 0.000091118 | up         |
| 37  | A_64_P021800  | Kpna4       | 5.632098751                                               | 2.65593E-05 | up         |
| 38  | A_44_P490206  | Eif1b       | 5.621280762                                               | 4.4908E-06  | up         |
| 39  | A_64_P163728  | Rai12       | 5.550876891                                               | 3.14817E-06 | up         |
| 40  | A_42_P536564  | Etf1        | 5.501876808                                               | 8.28609E-09 | up         |
| 41  | A_44_P454646  | Fam69a      | 5.491987678                                               | 4.31565E-05 | up         |
| 42  | A_44_P1041610 | Atp6v0b     | 5.463239071                                               | 0.000351243 | up         |
| 43  | A_64_P165015  | Shcbp1l     | 5.384098765                                               | 0.001385853 | up         |
| 44  | A_64_P063463  | Sgpl1       | 5.362387609                                               | 2.39151E-05 | up         |
| 45  | A_64_P069646  | Nacc2       | 5.281276871                                               | 0.000150739 | up         |
| 46  | A_43_P10498   | Bag2        | 5.271238709                                               | 0.00025402  | up         |
| 47  | A_64_P075515  | Celf1       | 5.264098717                                               | 0.000356279 | up         |

|     |               |            |             |             |    |
|-----|---------------|------------|-------------|-------------|----|
| 48  | A_64_P152091  | Tmem194b   | 5.161409871 | 0.003354354 | up |
| 49  | A_64_P077723  | Nptn       | 5.150187687 | 0.000129056 | up |
| 50  | A_44_P1048663 | Ccnl1      | 5.124098722 | 4.32592E-05 | up |
| 51  | A_64_P025583  | RGD1311343 | 4.853039716 | 7.89563E-08 | up |
| 52  | A_64_P143547  | Fabp9      | 4.843998215 | 7.05483E-07 | up |
| 53  | A_64_P148976  | Rnase10    | 4.841031452 | 5.26522E-07 | up |
| 54  | A_44_P556319  | Fgf18      | 4.812011821 | 8.6575E-07  | up |
| 55  | A_44_P192000  | Sbsn       | 4.812335747 | 0.000476613 | up |
| 56  | A_44_P298465  | Gcg        | 4.802509053 | 1.99E-06    | up |
| 57  | A_42_P473398  | Cxcl1      | 4.800970928 | 6.92E-06    | up |
| 58  | A_64_P072903  | Astl       | 4.799264525 | 8.73E-05    | up |
| 59  | A_44_P370052  | Ldhc       | 4.747993412 | 1.06E-07    | up |
| 60  | A_44_P478144  | LOC290595  | 4.74119479  | 5.75E-07    | up |
| 61  | A_64_P034244  | Olr1       | 4.698946472 | 4.12E-07    | up |
| 62  | A_43_P14872   | Sdc1       | 4.692590385 | 1.30E-06    | up |
| 63  | A_44_P314969  | Slc6a3     | 4.68347793  | 2.54E-06    | up |
| 64  | A_64_P011489  | Gdf15      | 4.638006901 | 9.49E-06    | up |
| 65  | A_64_P155311  | Prss22     | 4.637451092 | 9.75E-05    | up |
| 66  | A_64_P061895  | Plscr2     | 4.632283874 | 0.000468106 | up |
| 67  | A_43_P15447   | Bglap      | 4.62976821  | 0.000102703 | up |
| 68  | A_64_P081203  | Dmkn       | 4.624265291 | 5.08E-06    | up |
| 69  | A_64_P136820  | Gas2l3     | 4.621279453 | 1.05E-05    | up |
| 70  | A_64_P142320  | Zfp458     | 4.620909602 | 4.30E-07    | up |
| 71  | A_64_P025833  | Oas1h      | 4.587594999 | 2.10E-05    | up |
| 72  | A_64_P139802  | Prph       | 4.578599791 | 5.55E-06    | up |
| 74  | A_64_P131151  | Opn4       | 4.564504109 | 2.92E-07    | up |
| 75  | A_44_P456172  | Mterfd3    | 4.560754457 | 5.89E-05    | up |
| 76  | A_64_P073303  | Plac1l     | 4.55376655  | 2.75E-06    | up |
| 79  | A_64_P005471  | Fam71f2    | 4.530810652 | 6.78E-07    | up |
| 80  | A_64_P140437  | Cxcl2      | 4.528945986 | 3.05E-05    | up |
| 81  | A_42_P559831  | Ces1c      | 4.509807853 | 7.37E-06    | up |
| 82  | A_44_P318318  | Mmp3       | 4.508283788 | 1.56E-06    | up |
| 83  | A_64_P080682  | LOC691952  | 4.492513586 | 1.61E-05    | up |
| 84  | A_42_P529780  | Spdya      | 4.48815562  | 2.03E-07    | up |
| 85  | A_64_P012198  | Agrp       | 4.485710352 | 3.06E-07    | up |
| 86  | A_64_P079474  | LOC691670  | 4.484512515 | 1.67E-05    | up |
| 88  | A_44_P536089  | Klre1      | 4.481827016 | 0.001092583 | up |
| 90  | A_44_P1035040 | Ccrl2      | 4.474679647 | 2.16E-07    | up |
| 91  | A_64_P127986  | Fam126b    | 4.471466291 | 5.21E-05    | up |
| 92  | A_44_P483992  | LOC678910  | 4.470124149 | 8.42E-05    | up |
| 93  | A_44_P448030  | RGD1307805 | 4.458755324 | 6.96E-07    | up |
| 94  | A_64_P109899  | Lgals4     | 4.449780586 | 8.80E-05    | up |
| 95  | A_64_P108887  | Cdk5r1     | 4.435589947 | 0.000618088 | up |
| 96  | A_44_P392201  | LOC682105  | 4.425890731 | 0.000139551 | up |
| 97  | A_44_P540992  | Ereg       | 4.399858824 | 3.42E-06    | up |
| 98  | A_64_P028190  | Irg1       | 4.370067812 | 4.67E-08    | up |
| 99  | A_64_P123118  | Fosl1      | 4.366533878 | 0.007693739 | up |
| 100 | A_64_P046125  | Tmem88     | 4.360958717 | 6.50E-06    | up |
| 101 | A_44_P233080  | Egr1       | 4.355929084 | 7.44E-07    | up |
| 102 | A_64_P087543  | Foxi1      | 4.33692652  | 0.006282403 | up |
| 103 | A_44_P142837  | Xirp1      | 4.333905412 | 6.99E-05    | up |

|     |               |            |             |             |    |
|-----|---------------|------------|-------------|-------------|----|
| 104 | A_43_P15198   | Rap1gap2   | 4.302001417 | 2.29E-05    | up |
| 105 | A_64_P054302  | Olr556     | 4.294146566 | 0.036175178 | up |
| 106 | A_44_P469584  | Cd14       | 4.289083591 | 1.38E-05    | up |
| 107 | A_64_P008033  | Fam83f     | 4.281966573 | 0.009857523 | up |
| 108 | A_64_P100516  | Aoc3       | 4.272848406 | 0.000433918 | up |
| 109 | A_64_P089170  | Cxadr1     | 4.261899776 | 0.000665369 | up |
| 110 | A_64_P055930  | Tmbim1     | 4.259516465 | 2.00E-05    | up |
| 111 | A_43_P11985   | Ccl20      | 4.256743029 | 0.00018013  | up |
| 113 | A_64_P157116  | Wee2       | 4.255990312 | 0.000148664 | up |
| 114 | A_64_P115060  | Ccl5       | 4.247426846 | 1.55E-05    | up |
| 115 | A_42_P638620  | Lcn2       | 4.210451948 | 5.83E-06    | up |
| 116 | A_64_P046552  | Sdcbp2     | 4.20700053  | 3.90E-05    | up |
| 117 | A_64_P015460  | Ccl4       | 4.20041702  | 4.87E-06    | up |
| 118 | A_43_P18469   | Sytl3      | 4.194658903 | 9.70E-05    | up |
| 119 | A_64_P023922  | LOC680810  | 4.185192553 | 0.00040148  | up |
| 120 | A_64_P135102  | Tas2r140   | 4.164044924 | 1.07E-06    | up |
| 121 | A_64_P066073  | Rap1gap    | 4.161570853 | 0.00026908  | up |
| 122 | A_42_P758222  | Arg1       | 4.159088546 | 1.93E-05    | up |
| 123 | A_64_P151795  | LOC689618  | 4.137745752 | 2.83E-06    | up |
| 124 | A_64_P077990  | Cphx       | 4.124487888 | 0.0025625   | up |
| 126 | A_42_P750340  | RGD1563319 | 4.115763449 | 5.72E-05    | up |
| 127 | A_64_P123169  | Mrp63      | 4.114781622 | 8.67E-05    | up |
| 128 | A_44_P462661  | Il1rn      | 4.111062865 | 6.91E-07    | up |
| 129 | A_64_P129895  | Tnfsf15    | 4.110043985 | 0.000259579 | up |
| 130 | A_44_P429006  | Cers1      | 4.106353039 | 0.000328608 | up |
| 131 | A_64_P150047  | Rab20      | 4.093518835 | 1.23E-06    | up |
| 132 | A_64_P248290  | Liph       | 4.091120507 | 6.02E-05    | up |
| 133 | A_42_P517554  | Polg2      | 4.08254843  | 2.68E-07    | up |
| 134 | A_43_P11616   | Atf3       | 4.04754859  | 1.52E-07    | up |
| 135 | A_64_P029486  | Tnnc2      | 4.027859798 | 0.000142738 | up |
| 136 | A_64_P007568  | LOC683581  | 4.017193162 | 1.89E-05    | up |
| 137 | A_64_P162306  | Ftsj2      | 4.016131013 | 1.02E-05    | up |
| 139 | A_44_P253393  | Tm7sf4     | 4.014950312 | 1.31E-08    | up |
| 140 | A_64_P065736  | Slc7a2     | 4.014348868 | 1.54E-06    | up |
| 141 | A_43_P11040   | Tppp3      | 4.001324592 | 2.07E-06    | up |
| 142 | A_64_P153159  | Ebi3       | 3.997060288 | 5.59E-06    | up |
| 143 | A_64_P113179  | Stk32a     | 3.984957488 | 0.026949936 | up |
| 144 | A_44_P1022002 | Ccl7       | 3.979867866 | 2.72E-07    | up |
| 145 | A_44_P457599  | Foxj1      | 3.97892903  | 6.78E-08    | up |
| 146 | A_44_P245845  | RGD1563302 | 3.975224485 | 0.010719018 | up |
| 147 | A_44_P269457  | Gpr83      | 3.971048552 | 8.40E-07    | up |
| 148 | A_64_P063518  | Slc25a37   | 3.967423302 | 7.85E-07    | up |
| 149 | A_64_P131021  | Elovl3     | 3.956899711 | 0.00014373  | up |
| 150 | A_64_P034541  | RGD1561909 | 3.95473493  | 1.10257E-05 | up |
| 151 | A_42_P693964  | Cyp26b1    | 3.952957927 | 0.001258744 | up |
| 152 | A_44_P899293  | Snai1      | 3.951713897 | 5.90243E-06 | up |
| 153 | A_64_P142492  | Nos2       | 3.944941756 | 0.002450803 | up |
| 154 | A_43_P23060   | Hsfy2      | 3.941100666 | 0.028295842 | up |
| 155 | A_64_P021141  | Rgs1       | 3.934978628 | 2.75376E-06 | up |
| 156 | A_64_P076832  | RGD1311447 | 3.927654971 | 4.94198E-05 | up |
| 157 | A_64_P023719  | Nlrp6      | 3.926655417 | 8.49009E-05 | up |

|     |               |              |             |             |    |
|-----|---------------|--------------|-------------|-------------|----|
| 158 | A_44_P182881  | Trim69       | 3.922654669 | 2.14252E-06 | up |
| 159 | A_64_P150904  | Rgc32        | 3.914682222 | 9.0851E-06  | up |
| 160 | A_44_P791176  | Cyth4        | 3.91004506  | 2.88469E-06 | up |
| 162 | A_44_P765013  | Rnf186       | 3.90940938  | 0.001225794 | up |
| 163 | A_64_P134410  | Nfia         | 3.909258086 | 0.004306577 | up |
| 165 | A_64_P007943  | Il7r         | 3.889543926 | 8.99641E-07 | up |
| 166 | A_64_P108845  | Spint2       | 3.885859306 | 3.63744E-06 | up |
| 167 | A_64_P038634  | RGD1310081   | 3.884848487 | 4.26965E-07 | up |
| 168 | A_44_P501112  | Mmp9         | 3.875897271 | 0.000010762 | up |
| 170 | A_64_P067065  | Cd207        | 3.87163979  | 2.26799E-06 | up |
| 171 | A_44_P1046118 | Tctex1d2     | 3.867700279 | 3.61509E-06 | up |
| 172 | A_64_P034414  | Tnf          | 3.865895124 | 0.000180076 | up |
| 174 | A_44_P423651  | Prss12       | 3.859349859 | 0.001996    | up |
| 175 | A_43_P12786   | Fabp4        | 3.857088726 | 4.88204E-09 | up |
| 176 | A_64_P100783  | Cnnm1        | 3.856202998 | 0.024120471 | up |
| 177 | A_64_P072219  | Rtp3         | 3.853841309 | 8.41859E-07 | up |
| 178 | A_44_P411097  | Apoa1        | 3.847716308 | 3.25302E-05 | up |
| 179 | A_64_P083229  | LOC688635    | 3.847712486 | 0.000257313 | up |
| 180 | A_44_P382831  | Epm2aip1     | 3.844043246 | 5.27783E-06 | up |
| 182 | A_64_P103025  | Il17f        | 3.841482283 | 8.04502E-05 | up |
| 183 | A_44_P277264  | Skil         | 3.833213089 | 3.11504E-05 | up |
| 184 | A_44_P435596  | Zfp36        | 3.829812246 | 5.10928E-05 | up |
| 185 | A_64_P137784  | Plvap        | 3.827914926 | 2.64099E-05 | up |
| 187 | A_64_P069386  | RGD1562871   | 3.824918568 | 0.001365641 | up |
| 189 | A_44_P105448  | Col4a5       | 3.822234431 | 0.018441418 | up |
| 190 | A_64_P140144  | LOC679989    | 3.82200412  | 0.023305509 | up |
| 191 | A_64_P158198  | RGD1561239   | 3.806993219 | 5.93296E-06 | up |
| 192 | A_44_P408173  | Kif2b        | 3.8031107   | 0.00040975  | up |
| 193 | A_44_P294838  | Il1a         | 3.801447412 | 2.38307E-06 | up |
| 194 | A_44_P271511  | Adam2        | 3.799067468 | 0.000236821 | up |
| 195 | A_64_P109143  | Gkn1         | 3.793639703 | 0.026604053 | up |
| 197 | A_64_P122489  | Hdc          | 3.789749    | 0.000146495 | up |
| 198 | A_64_P054923  | LOC680029    | 3.788811854 | 0.000129572 | up |
| 199 | A_44_P409820  | Faslg        | 3.788723878 | 8.01412E-05 | up |
| 200 | A_64_P060303  | Lsr          | 3.788545304 | 6.43442E-05 | up |
| 201 | A_64_P058015  | Gimap1       | 3.785889054 | 0.0379662   | up |
| 202 | A_64_P025639  | Rec8         | 3.775764192 | 0.00141192  | up |
| 205 | A_44_P109523  | Olr1627      | 3.775223612 | 0.000316822 | up |
| 206 | A_44_P883087  | Rgs13        | 3.76945252  | 5.40627E-08 | up |
| 207 | A_64_P151468  | Spint3       | 3.764386601 | 0.000508778 | up |
| 208 | A_64_P054251  | Pax3         | 3.764187084 | 0.000382004 | up |
| 209 | A_64_P185041  | LOC494527    | 3.763551639 | 1.36743E-07 | up |
| 210 | A_44_P1034950 | Adora2a      | 3.761476299 | 2.20823E-05 | up |
| 211 | A_42_P695401  | Ccl2         | 3.751417505 | 2.27647E-05 | up |
| 212 | A_64_P081063  | LOC363746    | 3.74017861  | 0.000119967 | up |
| 214 | A_64_P097857  | LOC100233213 | 3.739989794 | 0.01358707  | up |
| 215 | A_64_P053353  | Jun          | 3.734308197 | 4.90317E-06 | up |
| 217 | A_44_P511275  | LOC685904    | 3.732788583 | 0.000685145 | up |
| 218 | A_64_P082341  | Slc5a3       | 3.730978983 | 0.000448684 | up |
| 219 | A_44_P808807  | Lrrc23       | 3.726726211 | 0.010260291 | up |
| 220 | A_64_P078894  | Il23a        | 3.723897422 | 0.000114621 | up |



|     |               |            |             |             |    |
|-----|---------------|------------|-------------|-------------|----|
| 221 | A_44_P1047467 | Igf2bp2    | 3.722445345 | 4.19E-05    | up |
| 222 | A_64_P045122  | Mesp1      | 3.721487096 | 1.77E-05    | up |
| 223 | A_44_P762292  | Serpinf2   | 3.716696797 | 5.04E-05    | up |
| 224 | A_64_P061662  | Entpd2     | 3.714440973 | 0.00022721  | up |
| 225 | A_64_P148816  | RGD1561777 | 3.708285103 | 0.005571893 | up |
| 226 | A_64_P043411  | Lrrc26     | 3.701704332 | 0.001800527 | up |
| 227 | A_42_P765736  | Agpat9     | 3.695492639 | 0.00018355  | up |
| 228 | A_64_P081040  | Gzmn       | 3.690980204 | 0.000559433 | up |
| 229 | A_43_P16529   | Gadd45b    | 3.678845273 | 0.00075509  | up |
| 230 | A_44_P520929  | C1qtnf1    | 3.672127539 | 3.03E-05    | up |
| 231 | A_64_P267691  | Trpm3      | 3.668087024 | 0.048238612 | up |
| 232 | A_64_P025808  | Oas1e      | 3.663291147 | 3.03E-05    | up |
| 233 | A_64_P029805  | Junb       | 3.662457454 | 1.03E-05    | up |
| 234 | A_44_P667270  | RGD1559875 | 3.662322063 | 2.80E-05    | up |
| 235 | A_64_P161635  | RGD1310507 | 3.660291803 | 4.58E-05    | up |
| 236 | A_64_P000824  | Tecpr1     | 3.655439396 | 0.001402386 | up |
| 237 | A_64_P092668  | Zfp275     | 3.649506355 | 0.004994644 | up |
| 238 | A_64_P003784  | Casp14     | 3.642734883 | 9.32E-05    | up |
| 239 | A_64_P014080  | Htr3b      | 3.642721416 | 0.002754551 | up |
| 240 | A_64_P139497  | Olr1262    | 3.641033463 | 0.032315705 | up |
| 241 | A_64_P295167  | Trpc3      | 3.637970893 | 0.002776655 | up |
| 242 | A_42_P683837  | Serpib6b   | 3.63433985  | 0.000748796 | up |
| 243 | A_44_P436310  | Ctnna3     | 3.632483723 | 0.017976701 | up |
| 244 | A_44_P175495  | Cxcl11     | 3.617872335 | 9.53E-05    | up |
| 245 | A_44_P513747  | Eea1       | 3.609439111 | 1.06596E-05 | up |
| 246 | A_64_P062899  | Bcar1      | 3.604413931 | 0.005421746 | up |
| 247 | A_42_P623913  | Sox18      | 3.602761875 | 0.030224555 | up |
| 248 | A_43_P10581   | Mafk       | 3.589442284 | 0.00171437  | up |
| 249 | A_64_P013654  | Pde6b      | 3.587113763 | 0.000164141 | up |
| 250 | A_64_P136362  | RGD1306000 | 3.575705866 | 0.020389539 | up |
| 251 | A_42_P824489  | Tgm2       | 3.573116946 | 1.76E-05    | up |
| 252 | A_42_P506402  | Slc25a25   | 3.570676253 | 2.79034E-06 | up |
| 253 | A_64_P056707  | Scg2       | 3.566697675 | 3.24979E-05 | up |
| 254 | A_43_P16166   | Cd69       | 3.565812638 | 7.79504E-07 | up |
| 255 | A_64_P021631  | Nxnl2      | 3.562412552 | 0.000482789 | up |
| 256 | A_42_P610788  | Ampd3      | 3.561237535 | 8.74644E-06 | up |
| 257 | A_64_P164255  | Hivep3     | 3.557545808 | 0.001072673 | up |
| 258 | A_44_P371635  | Tnfaip6    | 3.557477996 | 7.89E-06    | up |
| 259 | A_64_P079930  | Tcf15      | 3.556374286 | 0.000971982 | up |
| 260 | A_64_P010653  | Cyb5r1     | 3.541604553 | 0.000760108 | up |
| 261 | A_64_P036875  | Lalba      | 3.534639709 | 0.013709839 | up |
| 262 | A_64_P058336  | Ucn        | 3.525943442 | 0.000140141 | up |
| 263 | A_64_P052017  | Cxcl3      | 3.520151693 | 1.14968E-06 | up |
| 264 | A_64_P125472  | LOC301893  | 3.51662297  | 0.000122451 | up |
| 265 | A_44_P332780  | Ptprj      | 3.516327553 | 0.000156646 | up |
| 266 | A_64_P044776  | Itih4      | 3.515910225 | 0.001523485 | up |
| 267 | A_44_P886690  | Lpar2      | 3.514313269 | 0.000318459 | up |
| 268 | A_44_P154138  | Rxfp2      | 3.513580615 | 0.008103979 | up |
| 269 | A_64_P080371  | Vom2r73    | 3.51172255  | 3.21E-06    | up |
| 270 | A_44_P639832  | Dhh        | 3.509599972 | 0.000519705 | up |
| 271 | A_42_P473594  | Egr2       | 3.507887142 | 3.38E-07    | up |

|     |               |              |             |             |    |
|-----|---------------|--------------|-------------|-------------|----|
| 272 | A_44_P518764  | LOC363060    | 3.506119414 | 1.45E-06    | up |
| 273 | A_42_P543654  | Fam176a      | 3.503890443 | 0.000699283 | up |
| 274 | A_64_P153951  | Ror2         | 3.496373559 | 0.034777175 | up |
| 275 | A_42_P625157  | Zfp503       | 3.493777822 | 3.96E-05    | up |
| 276 | A_44_P116261  | Gapdhs       | 3.482590877 | 0.037732045 | up |
| 277 | A_44_P536613  | Ch25h        | 3.474022505 | 0.000310579 | up |
| 278 | A_43_P12619   | Nr4a3        | 3.472078582 | 0.016913009 | up |
| 279 | A_43_P21037   | Snta1        | 3.471445688 | 1.01E-05    | up |
| 280 | A_43_P15253   | Icam1        | 3.462148324 | 1.02E-05    | up |
| 281 | A_64_P146692  | Slc22a1      | 3.445127397 | 0.000220123 | up |
| 282 | A_64_P145973  | RGD1307722   | 3.443432189 | 0.021764524 | up |
| 283 | A_64_P118789  | Olr1468      | 3.439450279 | 0.049133663 | up |
| 284 | A_43_P17221   | Myoz2        | 3.433593698 | 0.00072043  | up |
| 285 | A_64_P021795  | Kpna5        | 3.428852473 | 0.040160789 | up |
| 286 | A_44_P454065  | Jag1         | 3.424021672 | 1.00107E-05 | up |
| 287 | A_42_P739860  | Dusp5        | 3.423143882 | 7.53577E-06 | up |
| 288 | A_42_P574345  | LOC100360737 | 3.418205974 | 0.000210956 | up |
| 289 | A_64_P097842  | Marcksl1     | 3.416183173 | 3.58657E-08 | up |
| 290 | A_64_P034744  | Acrbp        | 3.410501743 | 5.55873E-07 | up |
| 291 | A_64_P023306  | Dot1l        | 3.409288056 | 7.89354E-05 | up |
| 292 | A_64_P019345  | Gk5          | 3.407309344 | 0.016407045 | up |
| 293 | A_44_P219796  | Nckap1       | 3.404637817 | 3.83419E-07 | up |
| 294 | A_64_P041712  | Zic2         | 3.396901614 | 0.042489713 | up |
| 295 | A_64_P046140  | Mrgprb13     | 3.393343944 | 0.003148274 | up |
| 296 | A_44_P211069  | RGD1306119   | 3.392311535 | 2.15972E-06 | up |
| 297 | A_64_P027707  | LOC685046    | 3.388774253 | 0.008144563 | up |
| 298 | A_44_P175807  | Rlim         | 3.387038377 | 9.32652E-06 | up |
| 299 | A_44_P620927  | Clec4e       | 3.383857464 | 4.73885E-08 | up |
| 300 | A_44_P821368  | RGD1560958   | 3.381022694 | 0.001911572 | up |
| 301 | A_64_P113301  | LOC681198    | 3.378405888 | 1.21651E-05 | up |
| 302 | A_44_P354078  | Hist1h1a     | 3.369545951 | 0.000616996 | up |
| 303 | A_64_P011116  | LOC681936    | 3.369118097 | 7.63985E-06 | up |
| 304 | A_64_P021775  | LOC286992    | 3.368846436 | 0.033759561 | up |
| 305 | A_43_P22825   | Cabyr        | 3.367101007 | 0.001224378 | up |
| 306 | A_44_P102369  | Socs1        | 3.361997535 | 0.041596445 | up |
| 307 | A_64_P104481  | Spag7        | 3.359508934 | 0.000753383 | up |
| 308 | A_44_P776423  | Opalin       | 3.357611555 | 0.005777135 | up |
| 309 | A_64_P092026  | Bhlha15      | 3.349681132 | 0.000354705 | up |
| 310 | A_64_P055017  | Olr500       | 3.346234768 | 0.000110884 | up |
| 311 | A_64_P059775  | Stmn3        | 3.344098479 | 0.000537192 | up |
| 312 | A_44_P349854  | Gna13        | 3.328783248 | 0.002160614 | up |
| 313 | A_64_P049131  | LOC680716    | 3.323408575 | 4.3729E-06  | up |
| 314 | A_44_P590748  | Ifih1        | 3.305498057 | 2.80569E-05 | up |
| 315 | A_64_P051533  | LOC690463    | 3.304833677 | 0.002245037 | up |
| 316 | A_43_P14911   | Il1b         | 3.304166758 | 3.46203E-05 | up |
| 317 | A_64_P105362  | RGD1308818   | 3.30387415  | 0.00127958  | up |
| 318 | A_64_P062890  | Oaz3         | 3.291934582 | 0.000276093 | up |
| 319 | A_44_P1038028 | Tnfrsf12a    | 3.287228324 | 3.87098E-05 | up |
| 320 | A_44_P330828  | MGC105649    | 3.277173377 | 6.84431E-07 | up |
| 321 | A_64_P139408  | Evc2         | 3.276834175 | 0.002010639 | up |
| 322 | A_43_P11527   | Adm          | 3.263714816 | 0.000551368 | up |

|     |               |              |             |             |    |
|-----|---------------|--------------|-------------|-------------|----|
| 323 | A_44_P1004840 | Tnfsf9       | 3.254108452 | 6.19919E-05 | up |
| 324 | A_44_P470430  | Fap          | 3.243652646 | 2.82895E-05 | up |
| 325 | A_64_P067005  | Rnf19b       | 3.240108669 | 0.04358081  | up |
| 326 | A_44_P487530  | Tmem56       | 3.23986021  | 0.009867796 | up |
| 327 | A_64_P170328  | RGD1563231   | 3.238836183 | 0.001007188 | up |
| 328 | A_64_P132511  | Mcc          | 3.234578367 | 0.002911299 | up |
| 329 | A_64_P031123  | Slc1a2       | 3.23399123  | 2.14567E-05 | up |
| 330 | A_64_P047027  | Rhpn2        | 3.233316868 | 0.001259395 | up |
| 331 | A_43_P19852   | Fam71a       | 3.231110224 | 0.000117885 | up |
| 332 | A_44_P325629  | Olr1425      | 3.225174156 | 0.039641289 | up |
| 333 | A_64_P126772  | Flywch1      | 3.224275826 | 0.002197157 | up |
| 334 | A_64_P043644  | Slamf6       | 3.222808949 | 1.58572E-05 | up |
| 335 | A_44_P312089  | Neur13       | 3.221074435 | 0.000324367 | up |
| 336 | A_44_P1004757 | Serp1b10     | 3.220762917 | 0.00321962  | up |
| 337 | A_64_P042219  | Syt7         | 3.212438348 | 0.000158284 | up |
| 338 | A_64_P111594  | Dnah10       | 3.206738327 | 5.57112E-05 | up |
| 339 | A_64_P129293  | RGD1306565   | 3.205449026 | 0.005001139 | up |
| 340 | A_64_P125973  | Tnfrsf1b     | 3.204412035 | 0.000021808 | up |
| 341 | A_64_P118367  | Lrrd1        | 3.20259648  | 0.011725132 | up |
| 342 | A_64_P024540  | Guca2a       | 3.200111855 | 0.000259189 | up |
| 343 | A_64_P151126  | Cep152       | 3.197764954 | 5.83976E-06 | up |
| 344 | A_44_P144257  | Fzd5         | 3.195930865 | 8.60906E-05 | up |
| 345 | A_44_P1037806 | Hpx          | 3.195599629 | 0.001326436 | up |
| 346 | A_64_P014504  | Ii27         | 3.192398608 | 0.000260909 | up |
| 347 | A_44_P635178  | Fam129b      | 3.188162872 | 3.69544E-05 | up |
| 348 | A_44_P368065  | Adprh1       | 3.181341105 | 0.009214306 | up |
| 349 | A_64_P024798  | Ubox5        | 3.177857867 | 0.00042803  | up |
| 350 | A_64_P130967  | LOC683410    | 3.172570008 | 0.000637777 | up |
| 351 | A_44_P1008751 | Fgd6         | 3.165076419 | 1.14516E-05 | up |
| 352 | A_64_P004705  | Akap2        | 3.164355963 | 2.60815E-05 | up |
| 353 | A_64_P120808  | Krt80        | 3.162742132 | 0.004707422 | up |
| 354 | A_64_P087184  | Vwa2-ps1     | 3.162249792 | 0.033201503 | up |
| 355 | A_42_P764365  | Mpp4         | 3.157108188 | 0.000263419 | up |
| 356 | A_64_P003972  | Slc22a4      | 3.155336057 | 1.33269E-05 | up |
| 357 | A_64_P040300  | LOC100366147 | 3.152487391 | 0.006960085 | up |
| 358 | A_64_P011005  | Eid3         | 3.150832729 | 3.95635E-06 | up |
| 359 | A_64_P162331  | Zfp46        | 3.150454921 | 0.000299315 | up |
| 360 | A_42_P839964  | Plin2        | 3.149108212 | 6.4411E-07  | up |
| 361 | A_42_P488904  | Slc25a44     | 3.147292868 | 2.46109E-06 | up |
| 362 | A_42_P574859  | Hamp         | 3.145674075 | 1.30604E-06 | up |
| 363 | A_44_P552514  | Ccr7         | 3.144018413 | 3.05232E-05 | up |
| 364 | A_64_P033591  | LOC100365120 | 3.143659435 | 0.005288612 | up |
| 365 | A_44_P515305  | Olr120       | 3.140578143 | 0.038071195 | up |
| 366 | A_43_P11472   | Hmox1        | 3.127567165 | 8.63879E-06 | up |
| 367 | A_42_P610317  | Zfp142       | 3.127327914 | 5.75245E-06 | up |
| 368 | A_44_P504221  | Ccnt1        | 3.118909447 | 0.046008695 | up |
| 369 | A_43_P19763   | Tlr2         | 3.118547644 | 1.66994E-05 | up |
| 370 | A_42_P485932  | Sulf2        | 3.100736863 | 0.000033691 | up |
| 371 | A_44_P404861  | Mmp10        | 3.096942148 | 9.69909E-05 | up |
| 372 | A_64_P165666  | Siglec5      | 3.082892677 | 1.08717E-06 | up |
| 373 | A_44_P1023538 | C3           | 3.078644532 | 0.003792053 | up |

|     |               |              |             |             |    |
|-----|---------------|--------------|-------------|-------------|----|
| 374 | A_64_P064983  | RGD1560455   | 3.072521984 | 0.000213265 | up |
| 375 | A_44_P771864  | Cdc14a       | 3.070317106 | 0.000203421 | up |
| 376 | A_42_P541884  | Irak2        | 3.06659455  | 3.62677E-06 | up |
| 377 | A_64_P012939  | Dapk2        | 3.065421655 | 0.003784632 | up |
| 378 | A_42_P576446  | Slc7a11      | 3.062266341 | 4.35735E-06 | up |
| 379 | A_64_P072808  | Mtnr1a       | 3.06210248  | 0.021931545 | up |
| 380 | A_64_P127823  | Ggct         | 3.06166153  | 0.004825268 | up |
| 381 | A_64_P056743  | LOC100366054 | 3.061641723 | 0.005035859 | up |
| 382 | A_43_P11660   | Pspn         | 3.059932793 | 0.004415331 | up |
| 383 | A_64_P035817  | Whsc1l1      | 3.059241501 | 9.52111E-05 | up |
| 384 | A_64_P142111  | Gxylt1       | 3.057553409 | 0.000457275 | up |
| 385 | A_42_P817417  | PVR          | 3.056512216 | 4.8689E-06  | up |
| 386 | A_64_P078393  | Aff4         | 3.049772512 | 7.71264E-06 | up |
| 387 | A_44_P342426  | Irf4         | 3.043840791 | 0.016865818 | up |
| 388 | A_64_P079149  | LOC685371    | 3.043400782 | 0.002300283 | up |
| 389 | A_64_P125715  | Serinc4      | 3.041440611 | 0.000219686 | up |
| 390 | A_64_P049085  | LOC100364218 | 3.038563272 | 0.007838295 | up |
| 391 | A_64_P130407  | Megf11       | 3.038364807 | 0.043912712 | up |
| 392 | A_64_P134265  | Rmrp         | 3.031736846 | 0.001007009 | up |
| 393 | A_44_P321532  | Apon         | 3.024134907 | 0.000132205 | up |
| 394 | A_64_P143862  | LOC678958    | 3.023544893 | 0.037652057 | up |
| 395 | A_64_P054949  | Vom2r72      | 3.019986708 | 0.002211933 | up |
| 396 | A_44_P561879  | Mthfd2l      | 3.019225124 | 0.000121219 | up |
| 397 | A_64_P026374  | Flt3         | 3.016882901 | 0.026506798 | up |
| 398 | A_64_P046358  | LOC688507    | 3.012113221 | 0.000806592 | up |
| 399 | A_42_P730320  | RGD1307937   | 3.008366979 | 3.92619E-05 | up |
| 400 | A_42_P621872  | Gcgr         | 3.003406531 | 2.39032E-06 | up |
| 401 | A_43_P19284   | Bcar3        | 3.001810005 | 0.010909233 | up |
| 402 | A_44_P1039128 | Cxcl10       | 2.992793629 | 0.000368142 | up |
| 403 | A_64_P059151  | Lhx9         | 2.988633524 | 0.005465241 | up |
| 404 | A_44_P1014659 | Plek2        | 2.983946701 | 0.028353418 | up |
| 405 | A_64_P095810  | Hormad2      | 2.978544541 | 0.048680418 | up |
| 406 | A_64_P036390  | Col4a3bp     | 2.975756407 | 8.52337E-08 | up |
| 407 | A_64_P038478  | Gcnt2        | 2.97473269  | 0.000486245 | up |
| 408 | A_44_P186860  | Nfkbib       | 2.970103213 | 1.15702E-05 | up |
| 409 | A_44_P236820  | LOC685608    | 2.96885987  | 0.0425452   | up |
| 410 | A_44_P151482  | Il22ra2      | 2.96792767  | 0.000592217 | up |
| 411 | A_44_P245616  | Nid1         | 2.963500567 | 0.000695122 | up |
| 412 | A_64_P131915  | LOC685685    | 2.96338273  | 0.045298795 | up |
| 413 | A_44_P212964  | Plac8        | 2.962373878 | 0.00033657  | up |
| 414 | A_64_P040563  | RGD1308305   | 2.961784486 | 0.011610894 | up |
| 415 | A_64_P042183  | Pim1         | 2.952983646 | 1.11479E-05 | up |
| 416 | A_42_P596050  | Cdhr1        | 2.950072343 | 3.69643E-05 | up |
| 417 | A_64_P022447  | Slc4a11      | 2.948703303 | 0.001012756 | up |
| 418 | A_42_P682216  | Tmem206      | 2.945294439 | 4.20425E-05 | up |
| 419 | A_64_P056618  | Mitf         | 2.944453724 | 0.000122609 | up |
| 420 | A_64_P038887  | Cdca7l       | 2.930461737 | 4.54162E-05 | up |
| 421 | A_64_P006618  | Fam71b       | 2.925887705 | 0.00019594  | up |
| 422 | A_44_P372261  | Slpi         | 2.922207585 | 7.26475E-05 | up |
| 423 | A_64_P078108  | Ets2         | 2.916998141 | 0.001107504 | up |
| 424 | A_64_P021149  | LOC686141    | 2.914665252 | 1.08148E-06 | up |

|     |              |            |             |             |    |
|-----|--------------|------------|-------------|-------------|----|
| 425 | A_64_P024052 | Dusp16     | 2.907110883 | 2.24453E-05 | up |
| 426 | A_64_P016190 | Rictor     | 2.906747524 | 1.02005E-05 | up |
| 427 | A_64_P157229 | Zfp334     | 2.905037996 | 0.009239691 | up |
| 428 | A_42_P619110 | Eaf1       | 2.898056992 | 1.14314E-07 | up |
| 429 | A_64_P016013 | Hepacam2   | 2.898012531 | 0.035995684 | up |
| 430 | A_42_P535644 | Adamts1    | 2.890723793 | 6.45653E-06 | up |
| 431 | A_42_P457692 | Zfand2a    | 2.889225216 | 2.81385E-05 | up |
| 432 | A_44_P121446 | Tmed5      | 2.886718508 | 1.44401E-07 | up |
| 433 | A_42_P607012 | RGD1305572 | 2.881956714 | 0.000083651 | up |
| 434 | A_64_P116899 | Cd247      | 2.876534885 | 0.013857557 | up |
| 435 | A_44_P388783 | Clec4d     | 2.873938786 | 0.000127262 | up |
| 436 | A_44_P400250 | Olr531     | 2.870727053 | 0.012494814 | up |
| 437 | A_44_P337177 | Olr816     | 2.850567703 | 0.011807153 | up |
| 438 | A_64_P031781 | LOC680578  | 2.845130183 | 0.008447716 | up |
| 439 | A_64_P018781 | Calcbl     | 2.844439705 | 0.035307993 | up |
| 440 | A_64_P074544 | Ankrd61    | 2.843141036 | 1.64522E-06 | up |
| 441 | A_64_P113950 | Zc3hav1l   | 2.840375104 | 0.033844341 | up |
| 442 | A_44_P281510 | Tlr7       | 2.838017529 | 0.000161576 | up |
| 443 | A_44_P807058 | Emp1       | 2.835827478 | 9.30003E-05 | up |
| 444 | A_64_P048606 | Rabgef1    | 2.831570925 | 7.33677E-05 | up |
| 445 | A_44_P279083 | Abcb1a     | 2.828001071 | 0.000398383 | up |
| 446 | A_43_P15536  | lfnb1      | 2.825538147 | 0.00012736  | up |
| 447 | A_64_P061786 | Mcf2l      | 2.823830839 | 0.003696314 | up |
| 448 | A_44_P127597 | Dnajb9     | 2.823356422 | 3.21578E-05 | up |
| 449 | A_44_P206985 | Gnrh1      | 2.823034644 | 6.12364E-07 | up |
| 450 | A_64_P145917 | Nus1       | 2.819866442 | 0.000261718 | up |
| 451 | A_43_P10008  | Aig1       | 2.817994248 | 0.006020091 | up |
| 452 | A_44_P832655 | LOC687118  | 2.817977645 | 0.000111474 | up |
| 453 | A_44_P110788 | ltgad      | 2.817010159 | 0.000244526 | up |
| 454 | A_42_P612977 | Cyb561     | 2.815199182 | 0.00254533  | up |
| 455 | A_42_P794120 | Stra6      | 2.81415716  | 0.00056731  | up |
| 456 | A_64_P057643 | Wdr25l     | 2.81176658  | 0.026695841 | up |
| 457 | A_64_P110574 | LOC365723  | 2.81022829  | 8.32229E-05 | up |
| 458 | A_64_P019581 | Olr1531    | 2.809133134 | 0.035863989 | up |
| 459 | A_64_P077447 | Tctn1      | 2.806709144 | 0.005952444 | up |
| 460 | A_42_P684538 | Slc2a1     | 2.794761426 | 9.55173E-06 | up |
| 461 | A_64_P098053 | Tm4sf19    | 2.793540882 | 0.000132137 | up |
| 462 | A_64_P018510 | Dcp1a      | 2.792396936 | 0.011608314 | up |
| 463 | A_64_P149829 | Fam154a    | 2.790840677 | 0.001812531 | up |
| 464 | A_44_P323053 | Usp53      | 2.789443506 | 0.000462262 | up |
| 465 | A_64_P002156 | Rgs2       | 2.788267867 | 5.93288E-06 | up |
| 466 | A_64_P048637 | Cnfn       | 2.787009847 | 0.00448148  | up |
| 467 | A_43_P12384  | Birc3      | 2.785390047 | 0.000975683 | up |
| 468 | A_42_P457895 | Supv3l1    | 2.7829497   | 5.66828E-06 | up |
| 469 | A_64_P050199 | Sema3c     | 2.782461258 | 0.002116789 | up |
| 470 | A_64_P069216 | Gramd1c    | 2.780987641 | 0.002678696 | up |
| 471 | A_64_P126906 | RGD1308644 | 2.772013596 | 0.000872232 | up |
| 472 | A_44_P366157 | RGD1311993 | 2.768956904 | 0.000210129 | up |
| 473 | A_64_P108674 | RGD1307554 | 2.768371006 | 6.09563E-06 | up |
| 474 | A_64_P232281 | Vom2r5     | 2.767806079 | 3.90717E-05 | up |
| 475 | A_44_P492025 | Oasl       | 2.766135572 | 0.000859503 | up |

|     |               |              |             |             |    |
|-----|---------------|--------------|-------------|-------------|----|
| 476 | A_44_P222124  | Tssk3        | 2.765960077 | 0.001625338 | up |
| 477 | A_64_P105221  | Unc5cl       | 2.763630681 | 0.001269555 | up |
| 478 | A_64_P162950  | Ccr1l1       | 2.760126075 | 0.000535839 | up |
| 479 | A_44_P1027971 | Gpr84        | 2.759540833 | 0.00014749  | up |
| 480 | A_42_P570241  | Nampt        | 2.755722914 | 6.74348E-07 | up |
| 481 | A_44_P1001317 | Obfc2a       | 2.749857261 | 0.001037819 | up |
| 482 | A_64_P073979  | Mcoln3       | 2.746718382 | 1.01621E-06 | up |
| 483 | A_42_P671348  | Hhatl        | 2.745063647 | 0.000604092 | up |
| 484 | A_64_P078185  | Hbz          | 2.737811273 | 0.025960799 | up |
| 485 | A_64_P070208  | Gdap1l1      | 2.736882503 | 0.006637112 | up |
| 486 | A_44_P318553  | Met          | 2.736167847 | 0.000254298 | up |
| 487 | A_42_P524525  | Otp          | 2.734884046 | 0.00160104  | up |
| 488 | A_43_P16449   | Pelo         | 2.733238083 | 0.000010416 | up |
| 489 | A_64_P026389  | Olr837       | 2.732038852 | 0.044259865 | up |
| 490 | A_42_P685145  | Cmpk2        | 2.729265225 | 1.95132E-05 | up |
| 491 | A_64_P086969  | Slc16a1      | 2.725195381 | 0.000407491 | up |
| 492 | A_64_P082067  | Ifit3        | 2.718272645 | 0.0006047   | up |
| 493 | A_64_P041802  | Klhl21       | 2.716600588 | 0.000128737 | up |
| 494 | A_64_P010887  | Sat1         | 2.714618884 | 1.48703E-06 | up |
| 495 | A_64_P120479  | Itgax        | 2.710020942 | 0.000056746 | up |
| 496 | A_64_P083149  | Kctd4        | 2.70821104  | 8.1153E-06  | up |
| 497 | A_64_P001612  | Trim35       | 2.70791227  | 6.11373E-05 | up |
| 498 | A_64_P011929  | Ii34         | 2.706682751 | 0.023750741 | up |
| 499 | A_64_P072451  | LOC298109    | 2.704913452 | 0.001021495 | up |
| 500 | A_64_P060695  | Hic1         | 2.704807647 | 0.022122911 | up |
| 501 | A_64_P085695  | Rpl36a       | 2.702611239 | 0.045412789 | up |
| 502 | A_64_P097078  | Pdp2         | 2.701739355 | 1.32479E-05 | up |
| 503 | A_64_P093234  | Col12a1      | 2.697194698 | 0.000140902 | up |
| 504 | A_43_P15474   | Spf2         | 2.689981032 | 6.52096E-05 | up |
| 505 | A_64_P153502  | Armc9        | 2.685897346 | 1.87022E-06 | up |
| 506 | A_64_P022248  | Ccdc62       | 2.685704665 | 6.28871E-05 | up |
| 507 | A_44_P348812  | Hist1h1t     | 2.682452207 | 0.006802504 | up |
| 508 | A_64_P073400  | Olr922       | 2.681611362 | 0.000533208 | up |
| 509 | A_44_P351211  | Phlda1       | 2.679823529 | 0.033704961 | up |
| 510 | A_43_P12241   | Prl7a3       | 2.67937343  | 0.000786279 | up |
| 511 | A_64_P063229  | Icam5        | 2.678325493 | 5.97047E-07 | up |
| 512 | A_64_P045646  | Dppa3l1      | 2.677965423 | 0.014593751 | up |
| 513 | A_64_P057535  | RGD1304770   | 2.677935538 | 0.043928472 | up |
| 514 | A_64_P102433  | Slc11a2      | 2.675995271 | 1.17643E-05 | up |
| 515 | A_64_P054538  | Clic4        | 2.666703082 | 1.31468E-05 | up |
| 516 | A_44_P443500  | RGD1309808   | 2.664967366 | 0.001931552 | up |
| 517 | A_64_P147174  | LOC100365915 | 2.662950294 | 4.89732E-07 | up |
| 518 | A_44_P194803  | Baalc        | 2.662267122 | 0.041204633 | up |
| 519 | A_64_P074665  | Olr1366      | 2.662042492 | 0.014975261 | up |
| 520 | A_64_P161546  | Aadacl3      | 2.659212066 | 0.00048357  | up |
| 521 | A_64_P269447  | Nr3c1        | 2.653522288 | 0.000042377 | up |
| 522 | A_64_P038625  | LOC686860    | 2.651746137 | 1.00069E-05 | up |
| 523 | A_64_P072387  | Zfp295       | 2.647509939 | 3.14606E-05 | up |
| 524 | A_64_P010648  | Ccl12        | 2.643163495 | 1.74322E-06 | up |
| 525 | A_64_P125676  | Sptbn4       | 2.641934868 | 0.003729938 | up |
| 526 | A_42_P667148  | Plscr1       | 2.637133609 | 5.24816E-06 | up |

|     |               |            |             |             |    |
|-----|---------------|------------|-------------|-------------|----|
| 527 | A_64_P014687  | Shbg       | 2.636531804 | 0.008320502 | up |
| 528 | A_64_P097527  | Pdhx       | 2.636319213 | 3.7681E-06  | up |
| 529 | A_64_P130523  | Niacr1     | 2.634851036 | 7.51375E-06 | up |
| 530 | A_44_P121280  | Kcne1      | 2.627035325 | 0.000710995 | up |
| 531 | A_64_P116924  | LOC498705  | 2.622562097 | 0.000316744 | up |
| 532 | A_42_P542985  | Cbln2      | 2.616862279 | 0.001236443 | up |
| 533 | A_64_P116069  | Stard8     | 2.610317265 | 0.044889913 | up |
| 534 | A_44_P837227  | LOC687994  | 2.604097863 | 2.08761E-05 | up |
| 535 | A_44_P273355  | Cxcr1      | 2.602355215 | 5.23736E-06 | up |
| 536 | A_64_P138216  | Gch1       | 2.601863181 | 8.42552E-06 | up |
| 537 | A_64_P054074  | Tgm3       | 2.599043175 | 0.010251111 | up |
| 538 | A_64_P136046  | Optn       | 2.598212927 | 5.44359E-06 | up |
| 539 | A_64_P071139  | Map3k2     | 2.597007175 | 2.69111E-05 | up |
| 540 | A_44_P222936  | Slc36a3    | 2.594985301 | 0.04444844  | up |
| 541 | A_64_P114258  | Alg10      | 2.594317647 | 0.000309021 | up |
| 542 | A_42_P688320  | Gbp5       | 2.590497157 | 0.000600949 | up |
| 543 | A_44_P175530  | Plek       | 2.590408575 | 8.46923E-05 | up |
| 544 | A_44_P791030  | Cecr6      | 2.590320296 | 0.04022686  | up |
| 545 | A_64_P070053  | Cd200      | 2.586889087 | 5.11525E-05 | up |
| 546 | A_64_P114700  | Slx1b      | 2.585950214 | 0.019433731 | up |
| 547 | A_44_P321075  | Rasal2     | 2.584500235 | 0.000428225 | up |
| 548 | A_64_P102405  | RGD1566149 | 2.584273926 | 9.68073E-06 | up |
| 549 | A_64_P002422  | LOC683713  | 2.580451771 | 1.13674E-06 | up |
| 550 | A_42_P694928  | Arl5c      | 2.57983566  | 0.010906518 | up |
| 551 | A_44_P867688  | Ttc23l     | 2.576972247 | 0.026380649 | up |
| 552 | A_44_P437966  | Apcs       | 2.575568481 | 0.004894746 | up |
| 553 | A_43_P11044   | G0s2       | 2.573838146 | 8.74331E-06 | up |
| 554 | A_64_P105933  | Defb52     | 2.573267789 | 0.000585655 | up |
| 555 | A_64_P056693  | Pom121l2   | 2.572301647 | 0.033781224 | up |
| 556 | A_64_P049331  | LOC683156  | 2.570848628 | 0.000371527 | up |
| 557 | A_42_P775217  | Ly6g6c     | 2.570401747 | 2.98608E-05 | up |
| 558 | A_64_P125521  | Hps5       | 2.568460701 | 0.000004311 | up |
| 559 | A_64_P139173  | Cd40       | 2.566766395 | 6.85075E-05 | up |
| 560 | A_64_P039737  | Scx        | 2.564501769 | 0.001937213 | up |
| 561 | A_43_P12743   | Atp7a      | 2.562459081 | 0.000157672 | up |
| 562 | A_64_P136679  | Rab7b      | 2.561959495 | 0.000325262 | up |
| 563 | A_44_P837093  | RGD1308023 | 2.561572101 | 0.000638424 | up |
| 564 | A_64_P061677  | Camp       | 2.560661407 | 6.50415E-05 | up |
| 565 | A_64_P280765  | Cd44       | 2.556314902 | 0.00082698  | up |
| 566 | A_44_P1009709 | Arl9       | 2.554286524 | 0.00138155  | up |
| 567 | A_64_P014291  | Dkk1       | 2.549264379 | 0.034183662 | up |
| 568 | A_64_P017916  | LOC681371  | 2.548825019 | 0.000107155 | up |
| 569 | A_44_P374638  | Hsd17b2    | 2.547539649 | 0.000392865 | up |
| 570 | A_64_P051822  | Ly6g5c     | 2.54532786  | 0.019657771 | up |
| 571 | A_64_P156448  | LOC685157  | 2.543747609 | 0.000740744 | up |
| 572 | A_64_P094561  | LOC498201  | 2.540686436 | 5.79513E-05 | up |
| 573 | A_44_P435422  | Mef2a      | 2.536959403 | 0.00022338  | up |
| 574 | A_64_P056712  | Gpr137b    | 2.534539181 | 5.36857E-06 | up |
| 575 | A_64_P116418  | Slc25a33   | 2.533974255 | 2.80303E-05 | up |
| 576 | A_64_P087169  | Wtip       | 2.528458851 | 0.000762772 | up |
| 577 | A_64_P115706  | C1qtnf6    | 2.527564427 | 0.03746945  | up |

|     |               |              |             |             |    |
|-----|---------------|--------------|-------------|-------------|----|
| 578 | A_64_P019555  | Sele         | 2.527277937 | 0.044884594 | up |
| 579 | A_43_P13508   | Arl5b        | 2.524930306 | 0.000163236 | up |
| 580 | A_44_P226315  | Slc16a10     | 2.51979203  | 0.020978144 | up |
| 581 | A_64_P003789  | LOC498480    | 2.518877567 | 0.014060658 | up |
| 582 | A_44_P1013314 | Isg15        | 2.518527644 | 0.000118725 | up |
| 583 | A_44_P281540  | Mcu          | 2.518312466 | 0.004302341 | up |
| 584 | A_64_P160313  | Nolc1        | 2.516585941 | 3.33973E-05 | up |
| 585 | A_44_P822989  | Rab11fip1    | 2.515066884 | 0.001453847 | up |
| 586 | A_64_P138086  | Pcdh20       | 2.514261429 | 0.000246945 | up |
| 587 | A_44_P281733  | Nlrp3        | 2.50973841  | 1.71086E-05 | up |
| 588 | A_64_P110234  | Serpina3k    | 2.505500224 | 0.01654111  | up |
| 589 | A_64_P007633  | C4bpb        | 2.503315507 | 7.82244E-05 | up |
| 590 | A_64_P003589  | Sts          | 2.50304258  | 3.72009E-05 | up |
| 591 | A_64_P296046  | Rhoc         | 2.502000828 | 0.000050528 | up |
| 592 | A_44_P200018  | Celsr3       | 2.50162695  | 0.040046669 | up |
| 593 | A_44_P187195  | C1galt1      | 2.496773875 | 8.25821E-05 | up |
| 594 | A_64_P130475  | RGD1310495   | 2.495783977 | 0.000310916 | up |
| 595 | A_64_P017761  | Morn1        | 2.49461717  | 0.022995483 | up |
| 596 | A_64_P067831  | Etv3l        | 2.49228243  | 6.75058E-05 | up |
| 597 | A_64_P147334  | Fkbp1b       | 2.491316532 | 0.032308903 | up |
| 598 | A_44_P360772  | Tagln        | 2.490694195 | 0.000642602 | up |
| 599 | A_64_P378583  | Vom2r71      | 2.482174599 | 0.000150577 | up |
| 600 | A_42_P803673  | LOC360228    | 2.481069588 | 3.81543E-05 | up |
| 601 | A_42_P682589  | Nr4a1        | 2.47785483  | 0.000172193 | up |
| 602 | A_44_P161823  | RGD1309049   | 2.47177513  | 0.002174335 | up |
| 603 | A_44_P1026139 | RGD1564927   | 2.471418846 | 0.001099207 | up |
| 604 | A_42_P754654  | RGD1562378   | 2.470006777 | 1.66735E-05 | up |
| 605 | A_44_P130856  | LOC100360801 | 2.469614742 | 0.03156543  | up |
| 606 | A_64_P034952  | Vom2r50      | 2.466414313 | 0.001035606 | up |
| 607 | A_64_P044573  | Gucy1a3      | 2.463756482 | 0.000828675 | up |
| 608 | A_64_P088392  | Hbb-b1       | 2.460015377 | 0.043684268 | up |
| 609 | A_64_P215165  | Spag9        | 2.451166299 | 0.000495139 | up |
| 610 | A_44_P560961  | Eil          | 2.448662035 | 4.80351E-05 | up |
| 611 | A_64_P109610  | Cflar        | 2.448211901 | 0.001359541 | up |
| 612 | A_64_P131543  | Olr140       | 2.445086888 | 0.017011254 | up |
| 613 | A_64_P020938  | Ppp1r15a     | 2.441127191 | 8.20745E-05 | up |
| 614 | A_44_P104985  | Serpinb2     | 2.43984613  | 0.007500102 | up |
| 615 | A_64_P003997  | Slco1a4      | 2.439113117 | 0.014127801 | up |
| 616 | A_44_P284129  | Csrnp1       | 2.433752566 | 0.011123426 | up |
| 617 | A_44_P744940  | lqcf1        | 2.433484019 | 0.023783996 | up |
| 618 | A_64_P155501  | Fam155b      | 2.433400019 | 0.000327121 | up |
| 619 | A_44_P792481  | Mcts2        | 2.432720147 | 0.001808209 | up |
| 620 | A_44_P494130  | Nfkb1        | 2.432430076 | 1.48706E-05 | up |
| 621 | A_64_P088587  | Stk33        | 2.430597769 | 0.00050502  | up |
| 622 | A_44_P289378  | Cpt1b        | 2.430594119 | 2.51559E-05 | up |
| 623 | A_64_P037245  | Shisa2       | 2.429801288 | 0.018856645 | up |
| 624 | A_64_P002621  | Ptpn12       | 2.429572134 | 0.009355575 | up |
| 625 | A_64_P103493  | RGD1305704   | 2.429045195 | 0.000361762 | up |
| 626 | A_64_P041040  | Grip2        | 2.42866864  | 0.044653231 | up |
| 627 | A_64_P158940  | Wsb1         | 2.426493508 | 4.66312E-05 | up |
| 628 | A_64_P035062  | Rims3        | 2.423986785 | 0.002623198 | up |



|     |              |            |             |             |    |
|-----|--------------|------------|-------------|-------------|----|
| 629 | A_64_P079260 | Ttc36      | 2.423884576 | 0.000724816 | up |
| 630 | A_44_P168159 | Cd55       | 2.423769099 | 1.94371E-05 | up |
| 631 | A_44_P725710 | Zbtb2      | 2.423111009 | 0.004018767 | up |
| 632 | A_44_P349089 | Ifna1      | 2.421429501 | 0.010651304 | up |
| 633 | A_64_P074940 | Fgd4       | 2.416112559 | 0.001903693 | up |
| 634 | A_64_P149230 | Ccdc154    | 2.415393373 | 1.71405E-05 | up |
| 635 | A_44_P811606 | Ripk2      | 2.414931611 | 4.57058E-05 | up |
| 636 | A_64_P113316 | Zfyve1     | 2.413320737 | 5.09866E-05 | up |
| 637 | A_44_P215157 | Lin7b      | 2.41067389  | 0.029655113 | up |
| 638 | A_64_P141050 | RGD1563120 | 2.410539939 | 0.006004391 | up |
| 639 | A_64_P140636 | LOC688390  | 2.409712226 | 0.01224845  | up |
| 640 | A_43_P12175  | Xiap       | 2.4088371   | 2.64146E-06 | up |
| 641 | A_64_P099963 | Steap2     | 2.408290343 | 0.046652596 | up |
| 642 | A_43_P21719  | Mpzl2      | 2.407918117 | 0.000449832 | up |
| 643 | A_64_P062766 | Atp6v0e2   | 2.40629302  | 0.000681025 | up |
| 644 | A_64_P232257 | Vom2r65    | 2.40163349  | 0.000219793 | up |
| 645 | A_64_P316652 | Cacna1a    | 2.398654442 | 0.000108314 | up |
| 646 | A_64_P121981 | Htra4      | 2.397863886 | 0.000229836 | up |
| 647 | A_64_P020269 | Hist1h2bh  | 2.396916193 | 0.00014661  | up |
| 648 | A_64_P007472 | Zfp592     | 2.394860298 | 0.000286782 | up |
| 649 | A_44_P138800 | Gcap14     | 2.394832078 | 0.000102154 | up |
| 650 | A_64_P020238 | Hist1h2bf  | 2.393634708 | 2.37825E-05 | up |
| 651 | A_64_P068648 | Foxj3      | 2.392585476 | 0.000534173 | up |
| 652 | A_64_P029377 | Hrh4       | 2.392148358 | 0.01007296  | up |
| 653 | A_64_P113414 | Kcnd3      | 2.391853896 | 0.000492507 | up |
| 654 | A_64_P158345 | Ddx60      | 2.390044312 | 0.000718223 | up |
| 655 | A_64_P084896 | Serpinb8   | 2.389436122 | 0.030556274 | up |
| 656 | A_64_P064254 | RGD1562534 | 2.389093528 | 0.002207605 | up |
| 657 | A_64_P007030 | N4bp1      | 2.388043307 | 2.82402E-05 | up |
| 658 | A_44_P478319 | Lonrf3     | 2.387484996 | 1.36855E-05 | up |
| 659 | A_44_P339818 | Ralgds     | 2.386321293 | 0.003228829 | up |
| 660 | A_64_P127634 | Ercc6      | 2.38396221  | 0.015508906 | up |
| 661 | A_44_P262593 | Ankrd2     | 2.383166529 | 0.001231009 | up |
| 662 | A_42_P730229 | Myo1d      | 2.38293869  | 0.015259495 | up |
| 663 | A_64_P031460 | Vom2r3     | 2.381387398 | 0.000173854 | up |
| 664 | A_44_P991335 | Capns2     | 2.380497697 | 0.001518055 | up |
| 665 | A_64_P051229 | RGD1565025 | 2.380430432 | 0.00464101  | up |
| 666 | A_64_P286599 | Vwf        | 2.379951983 | 0.010702635 | up |
| 667 | A_64_P119675 | Jund       | 2.378796734 | 0.000230431 | up |
| 668 | A_64_P005029 | Pcp4l1     | 2.372791552 | 0.022014237 | up |
| 669 | A_44_P146821 | Hivep2     | 2.368778005 | 1.45333E-05 | up |
| 670 | A_64_P042278 | Crem       | 2.368637353 | 0.000250744 | up |
| 671 | A_64_P060485 | LOC686683  | 2.367648639 | 0.027757606 | up |
| 672 | A_64_P020741 | Rsph1      | 2.364685304 | 0.000500361 | up |
| 673 | A_42_P638494 | Nppb       | 2.36072414  | 0.011255025 | up |
| 674 | A_64_P041507 | Slamf8     | 2.360472486 | 0.000437175 | up |
| 675 | A_64_P155925 | Ckm        | 2.357972403 | 0.004832955 | up |
| 676 | A_44_P135224 | Plk3       | 2.357279727 | 0.000140691 | up |
| 677 | A_64_P057211 | Tex101     | 2.355998031 | 0.038109324 | up |
| 678 | A_64_P041481 | Mep1b      | 2.355267298 | 0.022090467 | up |
| 679 | A_44_P262078 | Gfi1       | 2.354856259 | 0.001915547 | up |

|     |               |            |             |             |    |
|-----|---------------|------------|-------------|-------------|----|
| 680 | A_64_P128219  | Egr3       | 2.353911369 | 0.019135097 | up |
| 681 | A_64_P161180  | Rnf224     | 2.353104406 | 0.004946837 | up |
| 682 | A_64_P137941  | Nodal      | 2.352890204 | 0.000382847 | up |
| 683 | A_42_P555795  | Nfat5      | 2.352632917 | 2.60959E-06 | up |
| 684 | A_64_P138008  | Adra2b     | 2.351049911 | 0.029147701 | up |
| 685 | A_43_P15587   | Map3k8     | 2.35000474  | 1.21996E-05 | up |
| 686 | A_44_P441252  | Slc5a10    | 2.349673011 | 0.003201672 | up |
| 687 | A_64_P071218  | RGD1564031 | 2.349197325 | 0.000302918 | up |
| 688 | A_44_P283812  | Fam46c     | 2.345247963 | 1.06357E-06 | up |
| 689 | A_64_P062980  | Gzmb       | 2.340923843 | 1.31287E-05 | up |
| 690 | A_43_P12927   | Dusp1      | 2.340844661 | 6.50395E-05 | up |
| 691 | A_64_P082037  | LOC679127  | 2.340334587 | 0.001519028 | up |
| 692 | A_44_P1053032 | Rnf150     | 2.213508428 | 0.049471765 | up |
| 693 | A_43_P20143   | Ceacam20   | 2.213129952 | 0.024385162 | up |
| 694 | A_42_P614984  | Ucp1       | 2.21141762  | 0.000309253 | up |
| 695 | A_64_P002126  | Cacna1d    | 2.207783492 | 0.003680373 | up |
| 696 | A_44_P147328  | RGD1560248 | 2.20777885  | 0.000394165 | up |
| 697 | A_44_P386799  | Nudt9      | 2.205260877 | 6.97049E-05 | up |
| 698 | A_44_P287089  | Gmfb       | 2.204529323 | 7.22233E-06 | up |
| 699 | A_64_P086021  | RGD1561465 | 2.203857027 | 0.000255893 | up |
| 700 | A_64_P025915  | Gramd2     | 2.202778858 | 0.012170768 | up |
| 701 | A_64_P334603  | Tcrb       | 2.196839138 | 0.000570175 | up |
| 702 | A_64_P085767  | Utp15      | 2.194599478 | 9.90025E-07 | up |
| 703 | A_64_P012291  | Pdzd7      | 2.194213892 | 0.026152464 | up |
| 704 | A_64_P033121  | Rasa4      | 2.193822292 | 2.87817E-05 | up |
| 705 | A_44_P555271  | Mmp12      | 2.19257572  | 1.57091E-06 | up |
| 706 | A_44_P809374  | Clcf1      | 2.19120784  | 4.07172E-06 | up |
| 707 | A_64_P084995  | Tnfrsf26   | 2.190882329 | 1.30696E-05 | up |
| 708 | A_44_P1036481 | Prrc2c     | 2.186337818 | 0.00563102  | up |
| 709 | A_44_P448710  | Slc44a1    | 2.18205006  | 0.002833277 | up |
| 710 | A_44_P464196  | Cd97       | 2.180650405 | 0.000596932 | up |
| 711 | A_44_P878617  | Slc41a2    | 2.179419978 | 8.22446E-05 | up |
| 712 | A_64_P105417  | Fcrla      | 2.17889096  | 3.75532E-05 | up |
| 713 | A_64_P039888  | Abcb1b     | 2.178637799 | 3.69326E-05 | up |
| 714 | A_64_P111893  | Apol9a     | 2.178239114 | 6.79371E-05 | up |
| 715 | A_64_P110103  | Sod2       | 2.17027571  | 2.12174E-05 | up |
| 716 | A_64_P101817  | Sec24a     | 2.167962797 | 2.77807E-06 | up |
| 717 | A_43_P16141   | Nphs2      | 2.167774866 | 0.002626293 | up |
| 718 | A_64_P126757  | Bcl6b      | 2.166856579 | 5.87025E-05 | up |
| 719 | A_44_P468141  | Plaur      | 2.16665783  | 0.000493341 | up |
| 720 | A_42_P800859  | Rapgef2    | 2.165165542 | 2.02479E-05 | up |
| 721 | A_43_P11538   | Hk1        | 2.16302599  | 0.002467376 | up |
| 722 | A_64_P139519  | Tnfsf8     | 2.160674674 | 0.001206199 | up |
| 723 | A_44_P128564  | Stam       | 2.160291006 | 0.001782933 | up |
| 724 | A_44_P545867  | Unc119b    | 2.157887321 | 0.000538184 | up |
| 725 | A_44_P445972  | Med13      | 2.154598916 | 0.000021533 | up |
| 726 | A_64_P210110  | Schip1     | 2.153380851 | 0.041838514 | up |
| 727 | A_64_P031740  | MGC116197  | 2.153132744 | 0.045821784 | up |
| 728 | A_43_P23363   | Spata22    | 2.152904264 | 4.99816E-05 | up |
| 729 | A_64_P124791  | Timm8a1    | 2.150562659 | 1.48405E-05 | up |
| 730 | A_64_P061061  | Lmbrd2     | 2.149789943 | 0.000954481 | up |

|     |               |              |             |             |    |
|-----|---------------|--------------|-------------|-------------|----|
| 731 | A_44_P414996  | Gfpt1        | 2.148626424 | 0.000317981 | up |
| 732 | A_44_P1054213 | Hspa5        | 2.148398322 | 0.000240902 | up |
| 733 | A_43_P14700   | LOC691125    | 2.145279614 | 0.000311709 | up |
| 734 | A_43_P11685   | Id2          | 2.14507313  | 0.001327988 | up |
| 735 | A_64_P036676  | Klf6         | 2.143904536 | 0.004596205 | up |
| 736 | A_44_P307978  | Cited2       | 2.143164615 | 0.000266547 | up |
| 737 | A_64_P055099  | Clec2dl1     | 2.142416287 | 1.33299E-05 | up |
| 738 | A_64_P101185  | Slc45a1      | 2.141672525 | 0.034532888 | up |
| 739 | A_44_P638191  | Otud1        | 2.135898119 | 0.001352982 | up |
| 740 | A_64_P147564  | LOC689800    | 2.131700368 | 1.37854E-05 | up |
| 741 | A_64_P150525  | Nup98        | 2.129896511 | 0.000134251 | up |
| 742 | A_42_P533865  | Anks4b       | 2.129163442 | 0.000514301 | up |
| 743 | A_64_P053790  | Adra1a       | 2.128293818 | 0.040376848 | up |
| 744 | A_64_P110932  | Rps6ka2      | 2.128163314 | 0.033324949 | up |
| 745 | A_43_P12767   | Pdlim5       | 2.127304175 | 0.000168155 | up |
| 746 | A_64_P118992  | Pnck         | 2.126537555 | 0.019641536 | up |
| 747 | A_64_P076342  | AA926063     | 2.12341349  | 9.09519E-05 | up |
| 748 | A_64_P054048  | Pgm3         | 2.119156889 | 0.003723216 | up |
| 749 | A_43_P19848   | RGD1309870   | 2.11857387  | 0.000277569 | up |
| 750 | A_44_P1049055 | Hspa4l       | 2.116009836 | 6.27141E-05 | up |
| 751 | A_44_P191285  | RGD1564171   | 2.114258092 | 5.52597E-06 | up |
| 752 | A_64_P145092  | Olr1240      | 2.114062262 | 0.015552232 | up |
| 753 | A_64_P084243  | Cln5         | 2.113836121 | 0.02188998  | up |
| 754 | A_44_P450758  | Qtrt1        | 2.113626803 | 0.000297818 | up |
| 755 | A_64_P013157  | RGD1564463   | 2.113396314 | 1.51254E-05 | up |
| 756 | A_64_P067654  | Aldh3a1      | 2.112306078 | 0.031398455 | up |
| 757 | A_44_P459858  | Dysfip1      | 2.112138441 | 0.001813262 | up |
| 758 | A_44_P356829  | RGD1306484   | 2.110108574 | 0.013208357 | up |
| 759 | A_44_P192134  | Mapk8        | 2.110047778 | 0.001648716 | up |
| 760 | A_64_P037050  | Mkx          | 2.108725636 | 0.004222089 | up |
| 761 | A_64_P021094  | LOC689103    | 2.10867901  | 0.000306527 | up |
| 762 | A_44_P101700  | Stx11        | 2.105812132 | 7.99319E-05 | up |
| 763 | A_64_P089662  | LOC10036480C | 2.105386836 | 0.000198251 | up |
| 764 | A_64_P098464  | Slc9a7       | 2.104929625 | 0.000107038 | up |
| 765 | A_64_P006097  | Gjc2         | 2.102186743 | 0.001003303 | up |
| 766 | A_64_P056846  | Gclc         | 2.100746868 | 2.5863E-06  | up |
| 767 | A_64_P057847  | Alox12b      | 2.099437248 | 0.004595181 | up |
| 768 | A_64_P016911  | Frmd4a       | 2.09872213  | 0.00031693  | up |
| 769 | A_64_P064088  | Hdhd2        | 2.097750357 | 0.007236244 | up |
| 770 | A_64_P081967  | Fam53c       | 2.096388742 | 0.040050623 | up |
| 771 | A_43_P15356   | Mgea5        | 2.094174507 | 0.00027355  | up |
| 772 | A_44_P238246  | Ilf3         | 2.094083786 | 2.59272E-05 | up |
| 773 | A_44_P1033194 | Slc7a6os     | 2.094080641 | 0.000141783 | up |
| 774 | A_64_P110609  | LOC691298    | 2.092172103 | 0.002577622 | up |
| 775 | A_64_P053896  | Alkbh7       | 2.091401908 | 0.000694314 | up |
| 776 | A_64_P032574  | Hk2          | 2.090249368 | 0.004732291 | up |
| 777 | A_64_P138543  | Bmp2k        | 2.088833258 | 2.48458E-05 | up |
| 778 | A_43_P15993   | Itgam        | 2.086879067 | 3.28618E-06 | up |
| 779 | A_44_P537673  | Zbtb43       | 2.086555796 | 4.32898E-05 | up |
| 780 | A_42_P599062  | Plg          | 2.082562799 | 0.001277662 | up |
| 781 | A_44_P503471  | Itga7        | 2.082535179 | 0.000156007 | up |

|     |               |              |             |             |    |
|-----|---------------|--------------|-------------|-------------|----|
| 782 | A_64_P001089  | Adipoq       | 2.082414265 | 0.003756412 | up |
| 783 | A_64_P049432  | LOC100361196 | 2.081485247 | 7.48254E-06 | up |
| 784 | A_44_P1050015 | Vcpip1       | 2.080541405 | 0.001228651 | up |
| 785 | A_64_P158913  | Irak3        | 2.079964156 | 0.000140931 | up |
| 786 | A_42_P756706  | Riok3        | 2.077464753 | 8.40322E-06 | up |
| 787 | A_44_P142817  | Fem1b        | 2.077178455 | 0.000805504 | up |
| 788 | A_64_P136036  | Ankk1        | 2.075652118 | 0.012171549 | up |
| 789 | A_42_P639027  | Mmp14        | 2.075370434 | 0.000990033 | up |
| 790 | A_64_P019408  | LOC685030    | 2.075068075 | 2.86377E-05 | up |
| 791 | A_44_P536275  | Adamts4      | 2.073476505 | 9.40508E-05 | up |
| 792 | A_64_P031481  | Slc26a9      | 2.071444165 | 0.001244083 | up |
| 793 | A_42_P540950  | Ier2         | 2.06712505  | 9.48974E-05 | up |
| 794 | A_44_P216395  | Gadd45a      | 2.067039082 | 0.000946033 | up |
| 795 | A_64_P123050  | Lta          | 2.065048979 | 1.41184E-06 | up |
| 796 | A_44_P180240  | Tmem185b     | 2.064187705 | 4.39747E-05 | up |
| 797 | A_64_P084851  | Rcan2        | 2.062027919 | 0.00033291  | up |
| 798 | A_64_P039112  | Max          | 2.06138384  | 0.000291256 | up |
| 799 | A_42_P553444  | Pcsk5        | 2.060003802 | 6.70752E-06 | up |
| 800 | A_44_P196824  | Serpinb9     | 2.058946486 | 0.004672242 | up |
| 801 | A_64_P042402  | LOC691931    | 2.058171688 | 0.000376709 | up |
| 802 | A_64_P125506  | Psgb1        | 2.056004848 | 0.002249262 | up |
| 803 | A_64_P000904  | Kcna3        | 2.053158398 | 0.012229234 | up |
| 804 | A_64_P058923  | Tes          | 2.051694129 | 6.55065E-05 | up |
| 805 | A_64_P018633  | Muc2         | 2.049075155 | 0.001655464 | up |
| 806 | A_44_P112371  | Nkrf         | 2.048569066 | 0.000745923 | up |
| 807 | A_44_P1004376 | Ins2         | 2.047414065 | 0.031408105 | up |
| 808 | A_44_P498972  | Eya4         | 2.047053678 | 0.006804486 | up |
| 809 | A_44_P178252  | Ccl21        | 2.043955943 | 0.00099355  | up |
| 810 | A_64_P103238  | Zfp52        | 2.043653582 | 3.32065E-05 | up |
| 811 | A_64_P019160  | Etnk1        | 2.039140713 | 0.000189502 | up |
| 812 | A_44_P436040  | Rassf6       | 2.03900908  | 0.000215907 | up |
| 813 | A_44_P1008245 | Casc1        | 2.038718143 | 0.000975923 | up |
| 814 | A_64_P232269  | Vom2r4       | 2.036525671 | 2.69968E-05 | up |
| 815 | A_44_P263015  | Sntb1        | 2.035006543 | 2.85745E-05 | up |
| 816 | A_64_P058615  | Uncx         | 2.034936581 | 0.000103813 | up |
| 817 | A_64_P072268  | Ahi1         | 2.034268344 | 9.9631E-06  | up |
| 818 | A_64_P098006  | Fitm1        | 2.033709337 | 0.020666192 | up |
| 819 | A_64_P027487  | LOC690137    | 2.032629965 | 0.000146739 | up |
| 820 | A_64_P065837  | RGD1561557   | 2.032550222 | 0.010746869 | up |
| 821 | A_43_P12143   | Clip2        | 2.032486355 | 2.43439E-05 | up |
| 822 | A_44_P519620  | Litaf        | 2.031637723 | 1.85871E-05 | up |
| 823 | A_64_P061716  | LOC100363841 | 2.029263672 | 0.013757913 | up |
| 824 | A_43_P12209   | Stat5b       | 2.025917839 | 0.000195424 | up |
| 825 | A_42_P518855  | Bcl2a1d      | 2.02444133  | 3.01792E-06 | up |
| 826 | A_64_P080479  | Pdgfb        | 2.022187633 | 0.000555594 | up |
| 827 | A_64_P037577  | Lmtk2        | 2.020768889 | 3.59038E-05 | up |
| 828 | A_64_P038342  | Snrpn        | 2.018843391 | 0.010907087 | up |
| 829 | A_64_P141251  | LOC681152    | 2.018785085 | 0.000273545 | up |
| 830 | A_44_P993370  | Fermt2       | 2.017338246 | 1.47303E-05 | up |
| 831 | A_44_P320752  | Rasl11a      | 2.017197161 | 0.000471368 | up |
| 832 | A_44_P879764  | B4galt1      | 2.01710311  | 0.000125274 | up |

|     |               |            |             |             |      |
|-----|---------------|------------|-------------|-------------|------|
| 833 | A_44_P360972  | Vom2r70    | 2.016110761 | 4.48936E-05 | up   |
| 834 | A_64_P093452  | RGD1305464 | 2.013741966 | 0.000015335 | up   |
| 835 | A_44_P380575  | Slc7a5     | 2.01352958  | 3.93462E-06 | up   |
| 836 | A_44_P461085  | Gtf2h1     | 2.012472403 | 0.00224901  | up   |
| 837 | A_44_P351723  | Cldn10     | 2.010952912 | 0.001006121 | up   |
| 838 | A_44_P605194  | Cwc25      | 2.01023686  | 0.000232958 | up   |
| 839 | A_43_P19889   | Angptl6    | 2.008877789 | 0.01380705  | up   |
| 840 | A_64_P020834  | LOC680039  | 2.005753943 | 0.003005326 | up   |
| 841 | A_44_P395572  | Nr1d2      | 2.005650648 | 0.000386338 | up   |
| 842 | A_64_P113019  | Hsd17b13   | 2.005487536 | 0.001572687 | up   |
| 843 | A_44_P1012606 | Npap60     | 2.004829664 | 1.56409E-05 | up   |
| 844 | A_64_P157059  | Usp18      | 2.003562711 | 0.001086656 | up   |
| 845 | A_64_P048191  | Pcnx12     | 2.00061732  | 0.037725751 | up   |
| 846 | A_44_P544256  | Erc1       | 20.37195457 | 5.71842E-06 | down |
| 847 | A_43_P22351   | Slc46a3    | 15.79307397 | 4.26834E-06 | down |
| 848 | A_44_P272070  | Ntng2      | 13.91610277 | 0.000342188 | down |
| 849 | A_44_P491942  | Lrat       | 11.8408666  | 0.001289639 | down |
| 850 | A_64_P133967  | Abcd2      | 11.07752159 | 1.55517E-06 | down |
| 851 | A_43_P18802   | Pask       | 11.05870643 | 6.61644E-06 | down |
| 852 | A_42_P833264  | Zfp278     | 10.67769692 | 0.000318626 | down |
| 853 | A_64_P043406  | Lrrc56     | 10.54475302 | 5.14539E-05 | down |
| 854 | A_44_P480830  | Zfp426     | 10.53710126 | 4.24506E-06 | down |
| 855 | A_44_P794669  | Mllt4      | 10.4498737  | 0.013365767 | down |
| 856 | A_44_P236738  | Pole2      | 9.124418803 | 2.70275E-05 | down |
| 857 | A_44_P397423  | Tmcc3      | 8.659040679 | 1.56943E-06 | down |
| 858 | A_64_P125245  | Gpr34      | 8.450483567 | 0.000142631 | down |
| 859 | A_64_P025108  | Cebpa      | 6.765024692 | 0.002623186 | down |
| 860 | A_44_P294650  | Brca1      | 6.755390806 | 0.000225082 | down |
| 861 | A_43_P22402   | Fbxo5      | 6.740801459 | 0.004594025 | down |
| 862 | A_64_P098031  | Tfap4      | 6.655240646 | 8.21836E-05 | down |
| 863 | A_44_P732517  | Zadh2      | 6.55077017  | 1.45159E-05 | down |
| 864 | A_44_P211061  | Etv1       | 6.296350265 | 2.77721E-05 | down |
| 865 | A_42_P454311  | Dixdc1     | 6.193593792 | 1.62623E-07 | down |
| 866 | A_64_P072755  | Olr434     | 6.180269141 | 0.001070225 | down |
| 867 | A_44_P238556  | Mcpt2      | 6.021726984 | 0.020609007 | down |
| 868 | A_64_P164804  | Gpr18      | 5.977241499 | 4.0531E-06  | down |
| 869 | A_42_P596942  | Filip1     | 5.865068535 | 5.27974E-07 | down |
| 870 | A_44_P231935  | Rad51      | 5.851946311 | 0.001986443 | down |
| 871 | A_44_P248358  | Tk2        | 5.83642038  | 0.005073134 | down |
| 872 | A_64_P001259  | Ntng1      | 5.770459481 | 0.025725385 | down |
| 873 | A_42_P677662  | Ttc30b     | 5.746877246 | 0.001008966 | down |
| 874 | A_64_P163754  | Sec14l4    | 5.628899148 | 0.027427852 | down |
| 875 | A_44_P215253  | N4bp2l1    | 5.536743674 | 0.000961267 | down |
| 876 | A_44_P170018  | LOC304558  | 5.519719165 | 0.000465731 | down |
| 877 | A_44_P170368  | Fmo4       | 5.484425356 | 4.48862E-05 | down |
| 878 | A_64_P138291  | Cenpk      | 5.478696934 | 0.000145922 | down |
| 879 | A_44_P102876  | Fam173b    | 5.476989318 | 0.0094182   | down |
| 880 | A_44_P422080  | Alms1      | 5.394979833 | 0.000809954 | down |
| 881 | A_64_P136056  | Olr883     | 5.319539892 | 0.000935934 | down |
| 882 | A_64_P021686  | Epor       | 5.300459133 | 7.31064E-05 | down |
| 883 | A_64_P029726  | Add3       | 5.292816853 | 9.52055E-05 | down |

|     |               |            |             |             |      |
|-----|---------------|------------|-------------|-------------|------|
| 884 | A_64_P160175  | Enam       | 5.200980877 | 0.008579321 | down |
| 885 | A_44_P606174  | Bcl2l14    | 5.136519303 | 0.000160411 | down |
| 886 | A_44_P443479  | Mns1       | 5.132854979 | 2.02079E-05 | down |
| 887 | A_64_P166489  | Napepld    | 5.116330165 | 2.62411E-05 | down |
| 888 | A_44_P276338  | Mcm6       | 5.068019703 | 0.000181065 | down |
| 889 | A_64_P126896  | Ly49i9     | 5.05331682  | 0.000068132 | down |
| 890 | A_44_P223446  | Mcm2       | 5.037101376 | 0.000548641 | down |
| 891 | A_64_P068624  | Trim45     | 5.005579729 | 0.00016723  | down |
| 892 | A_64_P069071  | Lpar6      | 5.002347681 | 5.28797E-06 | down |
| 893 | A_64_P133421  | Eid2b      | 4.990603198 | 0.013553476 | down |
| 894 | A_42_P459431  | Bphl       | 4.928404373 | 1.92727E-06 | down |
| 895 | A_43_P12191   | Pdcd4      | 4.903476623 | 0.000650343 | down |
| 896 | A_64_P017329  | Syk        | 4.822743895 | 0.000362879 | down |
| 897 | A_64_P111214  | Pik3ca     | 4.793500003 | 0.004137928 | down |
| 898 | A_42_P670580  | Vipr1      | 4.750788563 | 0.00003351  | down |
| 899 | A_64_P097764  | Dtwd2      | 4.699013133 | 0.000605368 | down |
| 900 | A_44_P389462  | Zmym3      | 4.689105375 | 1.05843E-05 | down |
| 901 | A_43_P12819   | Pola2      | 4.646922766 | 0.000027004 | down |
| 902 | A_44_P492013  | Map3k4     | 4.623366827 | 0.000021935 | down |
| 903 | A_64_P127312  | LOC691166  | 4.558697985 | 0.001440102 | down |
| 904 | A_64_P038352  | Appl2      | 4.532055724 | 0.001704744 | down |
| 905 | A_64_P163160  | LOC686506  | 4.529490047 | 0.003111538 | down |
| 906 | A_42_P586883  | Skp2       | 4.515147443 | 0.00072121  | down |
| 907 | A_42_P789204  | Ypel3      | 4.512651394 | 1.50798E-05 | down |
| 908 | A_64_P041937  | Robo3      | 4.488092883 | 0.016517513 | down |
| 909 | A_64_P065492  | RGD1565222 | 4.485496751 | 1.70474E-05 | down |
| 910 | A_64_P127337  | Per3       | 4.485013621 | 0.00037017  | down |
| 911 | A_64_P059227  | Nudt12     | 4.413732513 | 4.35764E-05 | down |
| 912 | A_44_P196856  | Cir1       | 4.397718318 | 0.001942352 | down |
| 913 | A_64_P088427  | Hdac8      | 4.376906504 | 0.001092538 | down |
| 914 | A_42_P623374  | Tnrc6b     | 4.368926293 | 0.000027893 | down |
| 915 | A_64_P016578  | Rassf7     | 4.361899208 | 0.002303862 | down |
| 916 | A_44_P405790  | Cnpy3      | 4.326395831 | 0.001034597 | down |
| 917 | A_64_P102315  | LOC691777  | 4.320128824 | 0.001301309 | down |
| 918 | A_44_P412647  | Gins2      | 4.31733278  | 4.90329E-05 | down |
| 919 | A_64_P019798  | RGD1306227 | 4.314302095 | 3.81077E-06 | down |
| 920 | A_44_P1008591 | Tmem218    | 4.312015408 | 7.67244E-05 | down |
| 921 | A_44_P532473  | Traip      | 4.293811229 | 7.79496E-06 | down |
| 922 | A_44_P172140  | Hfe        | 4.284198521 | 0.002413491 | down |
| 923 | A_44_P267501  | Cep57l1    | 4.277870076 | 0.000073818 | down |
| 924 | A_64_P001710  | Mblac2     | 4.259381047 | 0.000179487 | down |
| 925 | A_44_P273885  | Mettl20    | 4.248547516 | 3.22905E-06 | down |
| 926 | A_64_P073653  | Zfp395     | 4.244748665 | 6.80347E-06 | down |
| 927 | A_64_P132841  | Gtf2i      | 4.244704728 | 0.00044797  | down |
| 928 | A_43_P16635   | Lrrc4b     | 4.225428933 | 0.006833686 | down |
| 929 | A_44_P203665  | Ccng2      | 4.218243955 | 0.000229009 | down |
| 930 | A_64_P112734  | RGD1562342 | 4.211428774 | 0.000052415 | down |
| 931 | A_44_P438718  | Stil       | 4.19678823  | 0.001053421 | down |
| 932 | A_64_P006002  | Ppp1r3b    | 4.182121376 | 0.002611659 | down |
| 933 | A_43_P19276   | Cep68      | 4.17475249  | 3.78906E-07 | down |
| 934 | A_44_P194531  | Ubac1      | 4.10477772  | 1.81045E-05 | down |

|     |               |            |             |             |      |
|-----|---------------|------------|-------------|-------------|------|
| 935 | A_44_P551169  | B4galt4    | 4.102586541 | 2.76291E-06 | down |
| 936 | A_44_P295051  | Tmem9      | 4.096268831 | 0.017917057 | down |
| 937 | A_64_P027742  | Ezh1       | 4.062755093 | 0.00748139  | down |
| 938 | A_43_P20515   | Zfand1     | 4.05814946  | 0.001542987 | down |
| 939 | A_44_P517591  | Eef2k      | 4.040430358 | 0.003266711 | down |
| 940 | A_44_P325911  | Sirt4      | 4.005221972 | 0.000155748 | down |
| 941 | A_64_P036621  | Ears2      | 3.982669509 | 0.020058797 | down |
| 942 | A_44_P256457  | Pan2       | 3.96196417  | 0.00051346  | down |
| 943 | A_44_P300093  | Ttc15      | 3.956258882 | 0.000820023 | down |
| 944 | A_64_P023541  | Atg16l1    | 3.955509856 | 0.018765726 | down |
| 945 | A_64_P157244  | Sfxn2      | 3.92696961  | 0.000760751 | down |
| 946 | A_64_P040061  | Gper       | 3.92635658  | 3.59472E-05 | down |
| 947 | A_44_P299721  | Rrm1       | 3.921561611 | 0.003397356 | down |
| 948 | A_44_P100443  | Ung        | 3.914917304 | 0.00080489  | down |
| 949 | A_44_P252441  | St3gal2    | 3.900780809 | 0.000143852 | down |
| 950 | A_43_P22136   | Nadkd1     | 3.888517056 | 3.03766E-05 | down |
| 951 | A_64_P033082  | Polr2e     | 3.8760642   | 0.001200043 | down |
| 952 | A_44_P176051  | Icam2      | 3.871053196 | 0.000668831 | down |
| 953 | A_44_P271062  | Tmem70     | 3.870677386 | 2.39723E-06 | down |
| 954 | A_44_P222004  | Ii15       | 3.867443012 | 0.000012811 | down |
| 955 | A_64_P165327  | RGD1562550 | 3.860779428 | 0.034010873 | down |
| 956 | A_44_P321669  | Map3k3     | 3.853048466 | 0.00027034  | down |
| 957 | A_44_P945723  | Zc3h12d    | 3.842630794 | 9.65046E-06 | down |
| 958 | A_64_P072748  | Cage1      | 3.842335866 | 0.000100207 | down |
| 959 | A_64_P032018  | Mettl8     | 3.839285286 | 0.003868221 | down |
| 960 | A_42_P772157  | Ii6r       | 3.801015566 | 0.000152655 | down |
| 961 | A_64_P153134  | LOC688310  | 3.797544841 | 9.24486E-06 | down |
| 962 | A_64_P091948  | Man2a2     | 3.794604257 | 0.023308022 | down |
| 963 | A_44_P183638  | Lilrb3     | 3.789672122 | 0.000106038 | down |
| 964 | A_64_P124459  | Olr1584    | 3.775886502 | 3.16523E-05 | down |
| 965 | A_44_P1011038 | Fbxo31     | 3.766187953 | 2.95899E-06 | down |
| 966 | A_64_P107836  | LOC683603  | 3.764987478 | 3.07965E-05 | down |
| 967 | A_64_P001971  | LOC690217  | 3.747456851 | 0.000788701 | down |
| 968 | A_64_P001147  | Zfp280d    | 3.730311652 | 0.003712673 | down |
| 969 | A_42_P837441  | Fam53b     | 3.726383096 | 6.15109E-05 | down |
| 970 | A_44_P554679  | Mtss1      | 3.716732006 | 5.13394E-06 | down |
| 971 | A_43_P13378   | Bmf        | 3.716068339 | 9.84458E-06 | down |
| 972 | A_64_P152124  | Txndc3     | 3.715603525 | 3.46632E-05 | down |
| 973 | A_44_P105749  | Rimbp3     | 3.712607585 | 2.65041E-07 | down |
| 974 | A_64_P026883  | Ick        | 3.710492866 | 2.63207E-05 | down |
| 975 | A_42_P555701  | Inpp5f     | 3.705827343 | 1.00671E-05 | down |
| 976 | A_64_P061602  | Cbx3       | 3.676735684 | 0.000220456 | down |
| 977 | A_64_P133816  | LOC311352  | 3.676434461 | 0.00026897  | down |
| 978 | A_64_P113725  | Slc1a3     | 3.674019627 | 1.97677E-05 | down |
| 979 | A_64_P140612  | Ccdc34     | 3.667701089 | 4.83457E-07 | down |
| 980 | A_44_P107552  | Tomm40b    | 3.66535703  | 0.000233186 | down |
| 981 | A_64_P029775  | RGD1304879 | 3.65941026  | 0.00536293  | down |
| 982 | A_64_P026032  | Olr219     | 3.658203334 | 0.002146421 | down |
| 983 | A_44_P342750  | Xrcc6bp1   | 3.649353652 | 0.00016458  | down |
| 984 | A_43_P19787   | LOC679811  | 3.649098009 | 0.006659237 | down |
| 985 | A_64_P299808  | Hmgn5      | 3.648601023 | 0.02731565  | down |

|      |               |              |             |             |      |
|------|---------------|--------------|-------------|-------------|------|
| 986  | A_44_P304009  | Fam111a      | 3.639008279 | 1.00403E-05 | down |
| 987  | A_42_P688442  | Usf1         | 3.632267615 | 0.000724185 | down |
| 988  | A_44_P426608  | Wdhd1        | 3.627293455 | 1.73127E-05 | down |
| 989  | A_44_P555399  | Figl1        | 3.616045005 | 0.000115794 | down |
| 990  | A_64_P032643  | Hells        | 3.602361589 | 9.56372E-05 | down |
| 991  | A_64_P038232  | LOC100366173 | 3.589009727 | 1.57792E-06 | down |
| 992  | A_42_P480224  | Gpd1         | 3.586208994 | 4.10859E-05 | down |
| 993  | A_44_P226597  | Pycard       | 3.58365834  | 9.64541E-05 | down |
| 994  | A_64_P397198  | Mms22l       | 3.574415879 | 0.019640662 | down |
| 995  | A_64_P312700  | Arhgef7      | 3.572922366 | 0.003059455 | down |
| 996  | A_64_P050079  | LOC100188984 | 3.570905941 | 0.000713876 | down |
| 997  | A_42_P522582  | Usp43        | 3.562326622 | 9.03122E-05 | down |
| 998  | A_42_P472375  | Pdk2         | 3.559834902 | 5.01408E-05 | down |
| 999  | A_44_P686987  | Gpr160       | 3.549838769 | 0.000736082 | down |
| 1000 | A_64_P126291  | Pex26        | 3.544186035 | 0.000475178 | down |
| 1001 | A_44_P637827  | Fam117b      | 3.53992714  | 1.95048E-05 | down |
| 1002 | A_44_P1019923 | Casp2        | 3.52597277  | 1.15324E-05 | down |
| 1003 | A_44_P959077  | Rad51c       | 3.522614091 | 3.22767E-05 | down |
| 1004 | A_64_P000121  | Rcctb1       | 3.509592674 | 0.00167827  | down |
| 1005 | A_64_P151046  | Trub2        | 3.48930522  | 0.005097051 | down |
| 1006 | A_64_P121058  | Smcr7        | 3.487478686 | 1.15334E-06 | down |
| 1007 | A_64_P095368  | Ctps         | 3.482669814 | 0.005021264 | down |
| 1008 | A_64_P065676  | Hipk2        | 3.476595773 | 0.000432734 | down |
| 1009 | A_42_P669870  | Gtpbp3       | 3.460596655 | 2.38548E-05 | down |
| 1010 | A_44_P289862  | Abhd6        | 3.459030177 | 0.001421542 | down |
| 1011 | A_42_P555426  | Fgfbp3       | 3.453930053 | 1.08056E-06 | down |
| 1012 | A_44_P326259  | Iffo1        | 3.453027443 | 0.001749172 | down |
| 1013 | A_64_P047206  | Deptor       | 3.446266015 | 0.000205906 | down |
| 1014 | A_44_P139042  | Zfp579       | 3.434911194 | 0.000180211 | down |
| 1015 | A_43_P20954   | Wdr96        | 3.42721904  | 0.000499339 | down |
| 1016 | A_44_P246311  | Rmnd5b       | 3.4238061   | 0.000173823 | down |
| 1017 | A_64_P099307  | Tcf7l2       | 3.422169773 | 2.31928E-06 | down |
| 1018 | A_64_P297053  | Ush2a        | 3.41548755  | 0.013457129 | down |
| 1019 | A_64_P308666  | Ttc21b       | 3.400724103 | 0.002548598 | down |
| 1020 | A_42_P583546  | Lims2        | 3.397854714 | 0.000344854 | down |
| 1021 | A_64_P097193  | Topbp1       | 3.397752656 | 3.06896E-05 | down |
| 1022 | A_64_P117086  | Abcc10       | 3.390789599 | 1.67751E-05 | down |
| 1023 | A_64_P029831  | Irf2bpl      | 3.381983607 | 4.42088E-07 | down |
| 1024 | A_44_P977318  | Tfcp2l1      | 3.380701878 | 8.13858E-05 | down |
| 1025 | A_42_P485589  | Map2k5       | 3.380414833 | 0.000415991 | down |
| 1026 | A_44_P265058  | Gmnn         | 3.379465532 | 0.000138231 | down |
| 1027 | A_64_P038107  | Apobec1      | 3.37290262  | 5.07262E-05 | down |
| 1028 | A_44_P1050144 | Plk1s1       | 3.340202958 | 5.92559E-05 | down |
| 1029 | A_64_P159170  | LOC689629    | 3.339547034 | 0.025042356 | down |
| 1030 | A_44_P416751  | Rpa1         | 3.336449421 | 0.007791807 | down |
| 1031 | A_44_P156262  | Myod1        | 3.336191647 | 5.08656E-06 | down |
| 1032 | A_44_P1044030 | Klhdc9       | 3.333991054 | 0.000651401 | down |
| 1033 | A_42_P707010  | Zfp426l      | 3.33156375  | 1.78281E-05 | down |
| 1034 | A_44_P1007561 | Vars2        | 3.327794855 | 2.09357E-05 | down |
| 1035 | A_64_P033214  | Top2a        | 3.325979016 | 0.001718781 | down |
| 1036 | A_64_P023401  | Fut4         | 3.32348544  | 0.000161459 | down |



|      |               |            |             |             |      |
|------|---------------|------------|-------------|-------------|------|
| 1037 | A_64_P032579  | Rab27a     | 3.319839128 | 1.02281E-05 | down |
| 1038 | A_44_P680622  | Clspn      | 3.318125223 | 0.000221863 | down |
| 1039 | A_64_P069051  | P2ry1      | 3.317671168 | 9.07003E-07 | down |
| 1040 | A_64_P094362  | Cabin1     | 3.309329859 | 0.00012894  | down |
| 1041 | A_64_P140275  | Cdan1      | 3.300885662 | 0.000019093 | down |
| 1042 | A_42_P664472  | Rasa3      | 3.29457682  | 3.79944E-06 | down |
| 1043 | A_44_P148383  | RGD1564952 | 3.288662214 | 6.1142E-06  | down |
| 1044 | A_44_P491824  | Camk2g     | 3.273939662 | 0.001262371 | down |
| 1045 | A_44_P250654  | Habp4      | 3.267759859 | 0.000193266 | down |
| 1046 | A_64_P005254  | LOC689656  | 3.267105404 | 0.000223909 | down |
| 1047 | A_43_P11817   | Ghr        | 3.260278407 | 1.07868E-05 | down |
| 1048 | A_44_P217866  | LOC310902  | 3.260133026 | 0.000125055 | down |
| 1049 | A_64_P116331  | Eif2c4     | 3.259995335 | 0.038813118 | down |
| 1050 | A_44_P1041312 | Fes        | 3.25916336  | 5.35599E-07 | down |
| 1051 | A_43_P21333   | Mtmr4      | 3.256111869 | 0.000200616 | down |
| 1052 | A_44_P1047628 | Pars2      | 3.254603137 | 9.06499E-07 | down |
| 1053 | A_44_P243826  | Adck5      | 3.250251448 | 0.038168851 | down |
| 1054 | A_44_P227616  | Engase     | 3.250119131 | 2.27629E-05 | down |
| 1055 | A_42_P772136  | Fam60a     | 3.249869454 | 0.00066013  | down |
| 1056 | A_42_P643272  | Gemin2     | 3.249018969 | 3.61571E-06 | down |
| 1057 | A_44_P279116  | Dyrk4      | 3.234060273 | 5.33892E-05 | down |
| 1058 | A_64_P072204  | LOC691979  | 3.234023958 | 4.65358E-05 | down |
| 1059 | A_44_P243004  | Amigo2     | 3.225636271 | 0.002102386 | down |
| 1060 | A_64_P125853  | Kbtbd3     | 3.218659805 | 2.48462E-05 | down |
| 1061 | A_43_P15508   | Rbl2       | 3.201835081 | 3.15368E-07 | down |
| 1062 | A_64_P153639  | Cnnm3      | 3.199861584 | 1.95316E-05 | down |
| 1063 | A_44_P534154  | Cnpy4      | 3.196906463 | 0.001884393 | down |
| 1064 | A_44_P387246  | Sin3a      | 3.1814668   | 0.001341419 | down |
| 1065 | A_44_P455101  | RGD1561102 | 3.175965484 | 0.006505568 | down |
| 1066 | A_43_P12090   | Pold1      | 3.170781945 | 2.42959E-06 | down |
| 1067 | A_44_P377156  | Cntnap1    | 3.168939903 | 1.6103E-06  | down |
| 1068 | A_44_P419810  | Lrr1       | 3.168649972 | 1.40814E-06 | down |
| 1069 | A_44_P494591  | Sall1      | 3.167103979 | 0.005278463 | down |
| 1070 | A_44_P623236  | Rbak       | 3.161016429 | 8.61838E-05 | down |
| 1071 | A_44_P480573  | Cytip      | 3.1604157   | 5.71662E-05 | down |
| 1072 | A_44_P748197  | Efcab11    | 3.15970711  | 0.000714282 | down |
| 1073 | A_44_P227121  | Txndc16    | 3.154997364 | 0.000021624 | down |
| 1074 | A_44_P335703  | Toag1      | 3.152990449 | 0.000650749 | down |
| 1075 | A_43_P11186   | Aifm2      | 3.146416885 | 0.000126249 | down |
| 1076 | A_64_P160663  | Ylpm1      | 3.144005119 | 4.76446E-06 | down |
| 1077 | A_64_P138641  | Zfp472     | 3.128450188 | 0.043992745 | down |
| 1078 | A_64_P037631  | Ar         | 3.126784519 | 0.007996956 | down |
| 1079 | A_42_P573118  | RGD1309594 | 3.125935116 | 0.000673907 | down |
| 1080 | A_44_P683157  | Zfp133     | 3.125923994 | 0.00062305  | down |
| 1081 | A_44_P792784  | Htr2c      | 3.125260757 | 0.014428672 | down |
| 1082 | A_44_P634770  | Cxxc5      | 3.114797126 | 0.000254819 | down |
| 1083 | A_44_P243847  | RGD1308299 | 3.113892199 | 6.04778E-05 | down |
| 1084 | A_44_P1058932 | Akr1b7     | 3.11039463  | 0.000812715 | down |
| 1085 | A_64_P236773  | Nudt6      | 3.105503585 | 4.33455E-05 | down |
| 1086 | A_44_P217604  | Msh2       | 3.098799403 | 0.000236898 | down |
| 1087 | A_64_P126265  | Rbm20      | 3.095978745 | 0.024932811 | down |

|      |               |              |             |             |      |
|------|---------------|--------------|-------------|-------------|------|
| 1088 | A_43_P10757   | Fam122b      | 3.093610001 | 1.97803E-06 | down |
| 1089 | A_44_P497033  | Was          | 3.09102188  | 0.002557418 | down |
| 1090 | A_44_P637482  | Slc25a42     | 3.089604777 | 0.000677549 | down |
| 1091 | A_42_P459212  | Tnfrsf21     | 3.088425079 | 0.000246802 | down |
| 1092 | A_64_P084188  | Nod1         | 3.086898614 | 0.000372236 | down |
| 1093 | A_44_P100207  | Cnp          | 3.084676649 | 0.006399936 | down |
| 1094 | A_64_P024138  | Sbk1         | 3.083445471 | 0.000118815 | down |
| 1095 | A_64_P012631  | Rbl1         | 3.080039956 | 6.24342E-06 | down |
| 1096 | A_44_P930446  | She          | 3.079888665 | 9.83286E-05 | down |
| 1097 | A_44_P295118  | Fam53a       | 3.078931491 | 0.000289367 | down |
| 1098 | A_64_P273084  | RGD1566085   | 3.078780611 | 0.00291871  | down |
| 1099 | A_44_P1018447 | Micall2      | 3.07638913  | 8.31952E-05 | down |
| 1100 | A_44_P489273  | Sucnr1       | 3.074398619 | 1.22374E-05 | down |
| 1101 | A_43_P16005   | Prkd3        | 3.072955908 | 0.002412017 | down |
| 1102 | A_44_P523198  | Akap8l       | 3.070496446 | 0.000566509 | down |
| 1103 | A_44_P310792  | Cog8         | 3.067818574 | 8.88148E-05 | down |
| 1104 | A_44_P323430  | Nme7         | 3.065799324 | 0.001595632 | down |
| 1105 | A_44_P415003  | Rpusd3       | 3.061346826 | 1.82583E-06 | down |
| 1106 | A_44_P244040  | Gtpbp5       | 3.060574882 | 0.004758864 | down |
| 1107 | A_44_P435059  | Hmgb3        | 3.05712823  | 6.3411E-06  | down |
| 1108 | A_44_P325268  | Scfd2        | 3.056166196 | 5.54579E-07 | down |
| 1109 | A_64_P056537  | Dscc1        | 3.055264326 | 0.000348718 | down |
| 1110 | A_44_P325782  | Hsd3b7       | 3.038224337 | 0.010793841 | down |
| 1111 | A_64_P068162  | Zfp161       | 3.034832936 | 0.002547215 | down |
| 1112 | A_64_P041763  | Lrrcc1       | 3.026606883 | 0.00347531  | down |
| 1113 | A_64_P077940  | LOC366300    | 3.025753584 | 0.000292608 | down |
| 1114 | A_44_P714007  | Cidec        | 3.025294731 | 5.93931E-06 | down |
| 1115 | A_44_P149293  | Trim23       | 3.023959673 | 0.002102047 | down |
| 1116 | A_43_P15924   | Pola1        | 3.023226214 | 0.001345818 | down |
| 1117 | A_64_P102708  | Ddi2         | 3.020983002 | 6.04987E-05 | down |
| 1118 | A_64_P122589  | Lman2l       | 3.005719888 | 0.000101175 | down |
| 1119 | A_43_P22126   | Ptcd1        | 3.003825211 | 0.001025746 | down |
| 1120 | A_44_P294753  | RGD621098    | 2.993692553 | 6.32025E-05 | down |
| 1121 | A_44_P208049  | Sh2b1        | 2.993168782 | 0.007243137 | down |
| 1122 | A_64_P021591  | Tpm1         | 2.989164582 | 1.82321E-05 | down |
| 1123 | A_44_P168602  | Rbm43        | 2.974451662 | 0.002159753 | down |
| 1124 | A_64_P071515  | Fkbp9        | 2.973871616 | 0.000395273 | down |
| 1125 | A_42_P809596  | Mfsd9        | 2.971336985 | 1.90944E-05 | down |
| 1126 | A_44_P400922  | Rad52        | 2.968463416 | 4.24237E-06 | down |
| 1127 | A_44_P187120  | LOC100361905 | 2.963648742 | 0.000116715 | down |
| 1128 | A_44_P487778  | RGD1309138   | 2.961542931 | 8.95594E-05 | down |
| 1129 | A_44_P867745  | Ggnbp1       | 2.95294346  | 0.008494699 | down |
| 1130 | A_44_P128007  | Slco2b1      | 2.949028299 | 0.000354886 | down |
| 1131 | A_64_P002814  | Grhl3        | 2.946056775 | 1.38406E-05 | down |
| 1132 | A_44_P355850  | Coro6        | 2.945630221 | 0.000473038 | down |
| 1133 | A_64_P258485  | Mapk14       | 2.940649831 | 1.05265E-05 | down |
| 1134 | A_64_P035724  | Fancb        | 2.939814653 | 0.000237399 | down |
| 1135 | A_44_P606344  | Bend6        | 2.932429654 | 0.000199702 | down |
| 1136 | A_44_P424552  | Plscr4       | 2.931234319 | 0.008572854 | down |
| 1137 | A_64_P058251  | RGD1566386   | 2.925949494 | 1.09408E-05 | down |
| 1138 | A_43_P21489   | Zmynd10      | 2.924196512 | 0.005091129 | down |

|      |               |            |             |             |      |
|------|---------------|------------|-------------|-------------|------|
| 1139 | A_64_P031516  | LOC362863  | 2.901905354 | 0.010261715 | down |
| 1140 | A_44_P267128  | Tmpo       | 2.900201153 | 7.16139E-05 | down |
| 1141 | A_44_P501408  | Phemx      | 2.897658076 | 0.000397571 | down |
| 1142 | A_64_P032986  | Lpgat1     | 2.896829285 | 0.004679542 | down |
| 1143 | A_64_P049648  | RGD1562963 | 2.895753436 | 0.029801132 | down |
| 1144 | A_44_P100197  | Zfp799     | 2.892509705 | 0.004052403 | down |
| 1145 | A_44_P667524  | RGD1565059 | 2.89053091  | 6.10009E-05 | down |
| 1146 | A_44_P274762  | Cpped1     | 2.883827626 | 0.000513887 | down |
| 1147 | A_44_P497553  | Gcnt1      | 2.88310684  | 0.000386207 | down |
| 1148 | A_64_P020456  | Rad51b     | 2.880834336 | 0.005452602 | down |
| 1149 | A_44_P302405  | Tia1       | 2.878747261 | 7.47917E-05 | down |
| 1150 | A_44_P996410  | Hspb6      | 2.868857946 | 0.000871429 | down |
| 1151 | A_64_P008777  | Ccdc28a    | 2.867238339 | 2.15379E-05 | down |
| 1152 | A_44_P337064  | Slc36a2    | 2.866944812 | 3.44031E-06 | down |
| 1153 | A_44_P501898  | Chtf18     | 2.866116329 | 0.004676183 | down |
| 1154 | A_64_P166440  | LOC685909  | 2.862945089 | 6.74855E-06 | down |
| 1155 | A_42_P713907  | Sgk196     | 2.852190018 | 0.002343017 | down |
| 1156 | A_44_P1037410 | Ophn1      | 2.849766734 | 0.010578922 | down |
| 1157 | A_64_P082461  | Zfp748     | 2.848926167 | 5.53609E-05 | down |
| 1158 | A_42_P629599  | Haus1      | 2.848876536 | 5.62755E-05 | down |
| 1159 | A_44_P997444  | Tube1      | 2.846357222 | 0.003018659 | down |
| 1160 | A_43_P17311   | Tmem129    | 2.833354661 | 0.000438819 | down |
| 1161 | A_64_P138636  | Nr2f1      | 2.832668415 | 1.11011E-05 | down |
| 1162 | A_43_P18024   | lkbip      | 2.831720748 | 0.004891982 | down |
| 1163 | A_44_P405139  | Arhgef11   | 2.827225584 | 0.000469478 | down |
| 1164 | A_44_P550191  | Slc2a8     | 2.827173065 | 0.001237571 | down |
| 1165 | A_64_P021440  | Slc10a6    | 2.824274078 | 0.000342069 | down |
| 1166 | A_44_P342166  | Plcg1      | 2.821657668 | 0.000683498 | down |
| 1167 | A_44_P477568  | Sdccag8    | 2.819375819 | 0.001597112 | down |
| 1168 | A_42_P818546  | Fhod1      | 2.817948671 | 0.000152829 | down |
| 1169 | A_64_P152014  | Lfng       | 2.814806598 | 1.75403E-05 | down |
| 1170 | A_44_P1018246 | Xpa        | 2.814491647 | 8.23761E-05 | down |
| 1171 | A_44_P594610  | Cdca8      | 2.813356803 | 0.001268804 | down |
| 1172 | A_64_P140936  | Zfp39      | 2.813148478 | 1.75678E-06 | down |
| 1173 | A_44_P956502  | Pik3cd     | 2.813118124 | 6.71478E-06 | down |
| 1174 | A_42_P535085  | Ndufv3     | 2.812844631 | 0.000101854 | down |
| 1175 | A_64_P154811  | LOC499980  | 2.811771972 | 1.00893E-06 | down |
| 1176 | A_44_P635769  | Mks1       | 2.809655406 | 0.000604946 | down |
| 1177 | A_44_P457218  | Ddx28      | 2.809363555 | 1.55769E-05 | down |
| 1178 | A_64_P160111  | LOC685003  | 2.803452579 | 3.19416E-05 | down |
| 1179 | A_44_P255954  | Kctd2      | 2.800848987 | 0.002190294 | down |
| 1180 | A_44_P913369  | Slc47a2    | 2.794837688 | 0.000532854 | down |
| 1181 | A_42_P614692  | Oplah      | 2.787688768 | 0.031928248 | down |
| 1182 | A_44_P494439  | Cnm2       | 2.784735879 | 0.00080099  | down |
| 1183 | A_44_P497193  | Senp8      | 2.784363626 | 0.005136583 | down |
| 1184 | A_64_P058619  | Wdr24      | 2.782706979 | 7.87363E-06 | down |
| 1185 | A_64_P049411  | LOC679229  | 2.781455839 | 0.00076989  | down |
| 1186 | A_64_P078263  | Iglon5     | 2.781091735 | 0.027154405 | down |
| 1187 | A_64_P087109  | Ankrd10    | 2.773047509 | 3.65407E-05 | down |
| 1188 | A_64_P088447  | Abhd8      | 2.773029569 | 0.000101497 | down |
| 1189 | A_44_P369847  | Keap1      | 2.770774945 | 0.005726068 | down |

|      |               |            |             |             |      |
|------|---------------|------------|-------------|-------------|------|
| 1190 | A_64_P245720  | Zinki      | 2.769511124 | 0.000289196 | down |
| 1191 | A_44_P259125  | Nkiras1    | 2.766692935 | 5.92451E-06 | down |
| 1192 | A_44_P363647  | Ezh2       | 2.765113436 | 0.000204539 | down |
| 1193 | A_64_P004057  | Olr220     | 2.759555689 | 0.000692689 | down |
| 1194 | A_44_P357089  | Fbxl20     | 2.759392598 | 0.003221464 | down |
| 1195 | A_64_P014774  | Mcm5       | 2.759319152 | 6.64217E-07 | down |
| 1196 | A_44_P513853  | Nxn        | 2.75867729  | 0.001534851 | down |
| 1197 | A_44_P246381  | Dgcr6      | 2.756744827 | 0.001086737 | down |
| 1198 | A_64_P018977  | Tex13b     | 2.756704828 | 0.008704428 | down |
| 1199 | A_64_P155216  | Kif9       | 2.756604067 | 0.000211455 | down |
| 1200 | A_64_P114378  | Rere       | 2.755275663 | 5.03641E-05 | down |
| 1201 | A_44_P274491  | Large      | 2.75362888  | 0.040258826 | down |
| 1202 | A_64_P091318  | RGD1309823 | 2.752466618 | 7.51346E-05 | down |
| 1203 | A_44_P473234  | Zfp688     | 2.749563871 | 0.000274499 | down |
| 1204 | A_64_P138470  | Ifi204     | 2.746510549 | 2.99055E-05 | down |
| 1205 | A_64_P021428  | Slc16a6    | 2.736179353 | 0.000187937 | down |
| 1206 | A_43_P17761   | Etaa1      | 2.734561673 | 0.009969202 | down |
| 1207 | A_43_P21231   | Suv39h1    | 2.734294554 | 0.000340092 | down |
| 1208 | A_64_P134124  | Xylt2      | 2.732667634 | 3.20131E-05 | down |
| 1209 | A_44_P293008  | Ing2       | 2.729266928 | 0.00051952  | down |
| 1210 | A_42_P826191  | Pecam1     | 2.727446693 | 0.000185111 | down |
| 1211 | A_64_P043033  | Cbr3       | 2.721264582 | 2.40037E-05 | down |
| 1212 | A_43_P23215   | Smpdl3b    | 2.720686009 | 2.55276E-05 | down |
| 1213 | A_64_P141737  | RGD1566325 | 2.719916571 | 0.000791003 | down |
| 1214 | A_64_P078827  | Aer61      | 2.719493982 | 0.004763969 | down |
| 1215 | A_42_P641107  | Rpa2       | 2.716671264 | 1.84847E-07 | down |
| 1216 | A_44_P466700  | Lpin1      | 2.716385934 | 0.000139    | down |
| 1217 | A_42_P713844  | Setd6      | 2.712981795 | 0.000364913 | down |
| 1218 | A_42_P492882  | Nckipsd    | 2.712669588 | 6.22897E-05 | down |
| 1219 | A_42_P599116  | Phldb3     | 2.711764886 | 0.00092627  | down |
| 1220 | A_64_P030010  | Klhdc2     | 2.709505358 | 8.29776E-06 | down |
| 1221 | A_44_P1040187 | Mri1       | 2.708541508 | 0.000168903 | down |
| 1222 | A_44_P115886  | RGD1309534 | 2.706552426 | 8.69327E-06 | down |
| 1223 | A_64_P032833  | Aspa       | 2.70646738  | 3.00423E-05 | down |
| 1224 | A_64_P044752  | Trank1     | 2.702917542 | 0.010119936 | down |
| 1225 | A_44_P149563  | Zfp646     | 2.701276025 | 0.002408357 | down |
| 1226 | A_64_P000604  | Tradd      | 2.697247357 | 0.000591956 | down |
| 1227 | A_42_P496322  | Ncoa7      | 2.696310606 | 0.001994836 | down |
| 1228 | A_64_P054719  | Ube2v1     | 2.693555329 | 0.019563469 | down |
| 1229 | A_44_P407543  | Mblac1     | 2.687571804 | 6.59444E-06 | down |
| 1230 | A_64_P087915  | Abtb1      | 2.680470641 | 0.000135665 | down |
| 1231 | A_64_P048136  | Brca2      | 2.677371807 | 0.00091681  | down |
| 1232 | A_44_P1048727 | Mppe1      | 2.676645355 | 0.000115782 | down |
| 1233 | A_64_P097704  | Plcb2      | 2.676521608 | 0.00232703  | down |
| 1234 | A_44_P367653  | Mrpl16     | 2.676094508 | 5.40979E-06 | down |
| 1235 | A_44_P173138  | Ehbp111    | 2.674957556 | 0.014276194 | down |
| 1236 | A_44_P187640  | Dnajc30    | 2.67448368  | 1.32351E-05 | down |
| 1237 | A_44_P358160  | Ear11      | 2.673553723 | 6.81689E-07 | down |
| 1238 | A_43_P13267   | Rab3il1    | 2.672928167 | 0.001160935 | down |
| 1239 | A_42_P656476  | Zer1       | 2.672229654 | 4.67748E-08 | down |
| 1240 | A_44_P213214  | Npepl1     | 2.667249715 | 0.000659786 | down |

|      |               |            |             |             |      |
|------|---------------|------------|-------------|-------------|------|
| 1241 | A_64_P113458  | LOC691692  | 2.666294551 | 0.000366943 | down |
| 1242 | A_42_P531971  | Hist3h2a   | 2.665691758 | 1.12337E-06 | down |
| 1243 | A_44_P326515  | Chmp6      | 2.660658285 | 0.006568812 | down |
| 1244 | A_44_P111662  | Ly49s3     | 2.660098682 | 2.70909E-05 | down |
| 1245 | A_44_P1024065 | Hdac5      | 2.65696643  | 0.00021772  | down |
| 1246 | A_64_P026828  | Abhd14a    | 2.655506327 | 3.68006E-06 | down |
| 1247 | A_43_P18690   | Pds5a      | 2.653536389 | 0.025910243 | down |
| 1248 | A_42_P592157  | Pbx2       | 2.652944817 | 0.000237933 | down |
| 1249 | A_44_P558163  | Lipt1      | 2.651899006 | 1.70341E-05 | down |
| 1250 | A_64_P055077  | Ccdc61     | 2.650277023 | 9.42748E-06 | down |
| 1251 | A_44_P117234  | Mcat       | 2.650087142 | 0.000235921 | down |
| 1252 | A_43_P15141   | LOC682988  | 2.649771581 | 3.28739E-05 | down |
| 1253 | A_44_P356596  | RGD1304592 | 2.648099626 | 0.008014094 | down |
| 1254 | A_44_P135082  | P2rx1      | 2.645201638 | 0.045220785 | down |
| 1255 | A_64_P011474  | Gtf3c5     | 2.643386288 | 0.000621511 | down |
| 1256 | A_42_P723173  | Id1        | 2.643298829 | 0.000498808 | down |
| 1257 | A_64_P108314  | Slc25a40   | 2.642589254 | 0.000245893 | down |
| 1258 | A_43_P15727   | Lrp4       | 2.641707498 | 0.008868379 | down |
| 1259 | A_44_P123788  | LOC293589  | 2.64155601  | 4.17671E-05 | down |
| 1260 | A_64_P229432  | Pparg      | 2.641128203 | 9.20987E-06 | down |
| 1261 | A_44_P1017913 | Dars2      | 2.639726877 | 5.85009E-06 | down |
| 1262 | A_42_P601920  | Cpt2       | 2.639632648 | 1.92603E-05 | down |
| 1263 | A_64_P035152  | Osbpl7     | 2.63317426  | 9.38373E-05 | down |
| 1264 | A_42_P562202  | Atpaf1     | 2.632263593 | 7.07905E-06 | down |
| 1265 | A_44_P272210  | Ccne2      | 2.628122458 | 0.000492824 | down |
| 1266 | A_43_P16541   | Toe1       | 2.624628623 | 7.23747E-05 | down |
| 1267 | A_44_P204207  | Smyd4      | 2.624507039 | 0.017522979 | down |
| 1268 | A_64_P143507  | Alkbh2     | 2.624307301 | 1.50415E-05 | down |
| 1269 | A_44_P293302  | Cep57      | 2.624007542 | 1.0333E-06  | down |
| 1270 | A_44_P382482  | Atp6v1c2   | 2.623620889 | 0.001316854 | down |
| 1271 | A_64_P019886  | Sfi1       | 2.621846094 | 0.000655399 | down |
| 1272 | A_44_P200846  | Sfxn5      | 2.620854204 | 0.004392347 | down |
| 1273 | A_64_P066404  | Dok4       | 2.62066298  | 0.000413318 | down |
| 1274 | A_64_P159578  | Phactr1    | 2.620181711 | 0.000120279 | down |
| 1275 | A_42_P561329  | Anapc1     | 2.61479915  | 2.03431E-05 | down |
| 1276 | A_44_P184484  | Orc1       | 2.613336074 | 2.20294E-06 | down |
| 1277 | A_64_P055984  | Hadha      | 2.612110207 | 0.007547574 | down |
| 1278 | A_43_P20713   | Klhl20     | 2.609205003 | 0.000354599 | down |
| 1279 | A_43_P10931   | Gpr68      | 2.602365918 | 9.85611E-05 | down |
| 1280 | A_64_P042899  | Exosc2     | 2.601221825 | 0.000372285 | down |
| 1281 | A_44_P165999  | Adck3      | 2.601066288 | 1.13319E-06 | down |
| 1282 | A_44_P321686  | Fam55c     | 2.597877493 | 0.010064999 | down |
| 1283 | A_44_P477555  | Ns5atp9    | 2.596411108 | 3.89417E-06 | down |
| 1284 | A_64_P022155  | Slc2a5     | 2.595728453 | 6.32254E-05 | down |
| 1285 | A_44_P241409  | Vgll4      | 2.594943871 | 0.00021417  | down |
| 1286 | A_64_P121291  | Pop5       | 2.593595453 | 6.56291E-05 | down |
| 1287 | A_64_P071193  | Nmral1     | 2.591760127 | 6.87941E-05 | down |
| 1288 | A_64_P000381  | LOC500392  | 2.588862962 | 0.002976775 | down |
| 1289 | A_44_P363549  | Nsun6      | 2.586853764 | 1.37975E-06 | down |
| 1290 | A_44_P264124  | Neurl4     | 2.586229791 | 0.000017324 | down |
| 1291 | A_64_P246030  | Pfkfb1     | 2.586147092 | 0.000500397 | down |

|      |               |            |             |             |      |
|------|---------------|------------|-------------|-------------|------|
| 1292 | A_44_P550454  | LOC687516  | 2.585736922 | 0.007118602 | down |
| 1293 | A_43_P20930   | Thumpd2    | 2.584747226 | 3.14219E-06 | down |
| 1294 | A_64_P051802  | Rab1b      | 2.583629026 | 0.000393387 | down |
| 1295 | A_42_P723540  | Dyrk3      | 2.583577211 | 7.41993E-06 | down |
| 1296 | A_44_P435664  | Rnf166     | 2.583494836 | 4.84398E-05 | down |
| 1297 | A_42_P608768  | Bbs12      | 2.577929958 | 1.36241E-05 | down |
| 1298 | A_64_P133167  | Duoxa2     | 2.576270477 | 0.000493056 | down |
| 1299 | A_64_P072504  | Tpra1      | 2.576045305 | 5.84789E-06 | down |
| 1300 | A_64_P107841  | LOC685069  | 2.57415751  | 6.65703E-06 | down |
| 1301 | A_64_P079523  | Ahnak2     | 2.566608648 | 0.000017405 | down |
| 1302 | A_64_P014837  | Pcdhga5    | 2.566024598 | 0.026568859 | down |
| 1303 | A_64_P025083  | Stx16      | 2.564340193 | 3.25415E-06 | down |
| 1304 | A_64_P162276  | Pcyox1     | 2.564058776 | 2.50932E-05 | down |
| 1305 | A_44_P1049865 | Crot       | 2.562978424 | 2.18247E-05 | down |
| 1306 | A_44_P369144  | Wdfy2      | 2.56287065  | 0.000294538 | down |
| 1307 | A_44_P1011464 | Rhobtb1    | 2.561829568 | 1.74045E-05 | down |
| 1308 | A_44_P107184  | Rbbp9      | 2.561121329 | 1.49941E-05 | down |
| 1309 | A_64_P077613  | Mrpl2      | 2.557754269 | 0.000203655 | down |
| 1310 | A_64_P151764  | Fam35a     | 2.557057318 | 0.001185285 | down |
| 1311 | A_44_P276435  | Nat1       | 2.556728556 | 4.10898E-06 | down |
| 1312 | A_64_P155721  | Taok2      | 2.55496926  | 0.000549556 | down |
| 1313 | A_44_P203305  | Olr1637    | 2.552357942 | 8.04563E-05 | down |
| 1314 | A_64_P004702  | Akap3      | 2.551842579 | 0.000108279 | down |
| 1315 | A_64_P049828  | Dbp        | 2.551791874 | 0.000034162 | down |
| 1316 | A_44_P328512  | Zswim2     | 2.551354849 | 0.001347148 | down |
| 1317 | A_42_P701779  | Rps6ka5    | 2.551028824 | 0.000053626 | down |
| 1318 | A_44_P403532  | RGD1564019 | 2.545714445 | 0.00062335  | down |
| 1319 | A_44_P491393  | Nudt7      | 2.545251703 | 0.000101908 | down |
| 1320 | A_64_P065071  | LOC690326  | 2.545215478 | 0.017258281 | down |
| 1321 | A_64_P089927  | Sirt7      | 2.543926873 | 0.011380908 | down |
| 1322 | A_44_P378631  | Decr2      | 2.542833147 | 5.19672E-05 | down |
| 1323 | A_64_P045206  | Rmnd1      | 2.542359181 | 0.000416618 | down |
| 1324 | A_44_P1009948 | RGD1304587 | 2.539057148 | 0.000713091 | down |
| 1325 | A_43_P20639   | Spsb2      | 2.53804468  | 0.003881946 | down |
| 1326 | A_44_P452186  | Epm2a      | 2.532731953 | 0.002296196 | down |
| 1327 | A_64_P047097  | Ptpn2      | 2.532505964 | 0.009476323 | down |
| 1328 | A_64_P136178  | LOC689091  | 2.531122385 | 0.016868818 | down |
| 1329 | A_44_P545314  | Vps4a      | 2.527732506 | 0.044950347 | down |
| 1330 | A_64_P139457  | LOC499124  | 2.527680644 | 0.000672708 | down |
| 1331 | A_64_P051816  | RGD1560978 | 2.516294591 | 0.009224113 | down |
| 1332 | A_64_P335246  | Fuk        | 2.515149809 | 0.000048272 | down |
| 1333 | A_42_P475260  | Elac1      | 2.515081993 | 0.011238692 | down |
| 1334 | A_44_P548581  | Fus        | 2.51025629  | 0.022631536 | down |
| 1335 | A_43_P19047   | Golph3l    | 2.510078818 | 3.73308E-05 | down |
| 1336 | A_64_P090799  | LOC686151  | 2.509599303 | 0.000817022 | down |
| 1337 | A_64_P011089  | Pnpo       | 2.509089327 | 0.000159856 | down |
| 1338 | A_43_P13144   | Cdkn2c     | 2.507621608 | 2.09403E-05 | down |
| 1339 | A_64_P131370  | Calr4      | 2.500558228 | 0.007152481 | down |
| 1340 | A_64_P133081  | LOC498154  | 2.497591732 | 0.000951704 | down |
| 1341 | A_64_P138493  | Cerk       | 2.497303216 | 3.04293E-06 | down |
| 1342 | A_43_P17424   | Chaf1b     | 2.497244016 | 0.000159607 | down |

|      |               |            |             |             |      |
|------|---------------|------------|-------------|-------------|------|
| 1343 | A_44_P524314  | Dcun1d4    | 2.495767081 | 1.49963E-06 | down |
| 1344 | A_64_P004337  | Dtl        | 2.495664786 | 0.000500408 | down |
| 1345 | A_64_P105681  | LOC363326  | 2.495085465 | 0.00053221  | down |
| 1346 | A_44_P316490  | RGD1311612 | 2.493239947 | 6.03958E-05 | down |
| 1347 | A_64_P115137  | Plin3      | 2.486521835 | 0.007481656 | down |
| 1348 | A_43_P16992   | Auh        | 2.483711492 | 0.002919772 | down |
| 1349 | A_64_P008216  | Ppp1r9b    | 2.483123069 | 0.014997162 | down |
| 1350 | A_64_P065902  | Zfp157     | 2.48191774  | 0.000249083 | down |
| 1351 | A_43_P11305   | Tmem86a    | 2.481284222 | 4.62695E-05 | down |
| 1352 | A_42_P618538  | Lta4h      | 2.480810149 | 0.000132243 | down |
| 1353 | A_44_P546180  | Cdc40      | 2.4804556   | 0.006077818 | down |
| 1354 | A_64_P001666  | Zc3h6      | 2.479575808 | 1.33842E-05 | down |
| 1355 | A_44_P468193  | Mxd3       | 2.479535132 | 1.96072E-05 | down |
| 1356 | A_42_P493008  | Nrbp       | 2.4789607   | 0.003879306 | down |
| 1357 | A_64_P051617  | RGD1308026 | 2.478935842 | 8.11229E-05 | down |
| 1358 | A_44_P344730  | Arhgap29   | 2.477916661 | 0.000663248 | down |
| 1359 | A_44_P379805  | Ankrd42    | 2.477053336 | 0.000308985 | down |
| 1360 | A_44_P533786  | Aurkb      | 2.475732143 | 0.000353747 | down |
| 1361 | A_64_P044410  | LOC498122  | 2.474958555 | 0.000144666 | down |
| 1362 | A_64_P100246  | Llgl1      | 2.47491481  | 0.00045502  | down |
| 1363 | A_64_P102255  | Yeats2     | 2.474541664 | 0.011110538 | down |
| 1364 | A_43_P17271   | RGD1307569 | 2.472933881 | 1.18347E-06 | down |
| 1365 | A_64_P078852  | RGD1560151 | 2.471624478 | 4.50555E-05 | down |
| 1366 | A_44_P514987  | Tshz1      | 2.469611889 | 0.005279228 | down |
| 1367 | A_43_P20684   | Tceanc2    | 2.467890072 | 0.003233699 | down |
| 1368 | A_42_P733209  | Dgat2      | 2.467042096 | 4.66872E-06 | down |
| 1369 | A_44_P653701  | Mybl2      | 2.466842773 | 0.000079338 | down |
| 1370 | A_64_P152883  | RGD1563986 | 2.465799792 | 0.010374696 | down |
| 1371 | A_44_P746666  | Zfp667     | 2.46563549  | 0.000377524 | down |
| 1372 | A_44_P380132  | P2ry10     | 2.465101983 | 0.000136563 | down |
| 1373 | A_44_P515852  | Tpx2       | 2.46186804  | 8.54943E-05 | down |
| 1374 | A_64_P142922  | Cabp1      | 2.459577135 | 0.003671171 | down |
| 1375 | A_64_P015079  | Nek2       | 2.458735538 | 0.005065731 | down |
| 1376 | A_44_P1031638 | Nsrp1      | 2.458507347 | 0.005186684 | down |
| 1377 | A_64_P118907  | B3galt6    | 2.458338987 | 0.004829647 | down |
| 1378 | A_64_P070043  | Rin3       | 2.452787812 | 0.000137013 | down |
| 1379 | A_64_P044137  | Lrrc24     | 2.450817401 | 0.011110835 | down |
| 1380 | A_64_P044505  | Pxmp2      | 2.450218939 | 0.000902496 | down |
| 1381 | A_64_P036788  | Pxk        | 2.449077565 | 0.00337029  | down |
| 1382 | A_44_P437945  | Bbc3       | 2.449054139 | 0.000114961 | down |
| 1383 | A_44_P529859  | Ing1       | 2.445359089 | 0.001558633 | down |
| 1384 | A_44_P466169  | Rnase17    | 2.445046044 | 4.36719E-05 | down |
| 1385 | A_64_P014632  | Gosr1      | 2.444996444 | 0.011676955 | down |
| 1386 | A_44_P309266  | Pbk        | 2.443708891 | 5.55435E-05 | down |
| 1387 | A_44_P1011595 | Phf7       | 2.441262334 | 5.30593E-05 | down |
| 1388 | A_44_P480954  | Abhd15     | 2.440213312 | 0.001544052 | down |
| 1389 | A_44_P425848  | Rassf3     | 2.440061201 | 0.000098791 | down |
| 1390 | A_44_P190229  | Fam58b     | 2.439800187 | 0.003961719 | down |
| 1391 | A_44_P1021476 | Zfp637     | 2.439370112 | 7.53126E-06 | down |
| 1392 | A_42_P794052  | LOC691221  | 2.436681633 | 0.000603227 | down |
| 1393 | A_44_P411771  | LOC680262  | 2.436192047 | 0.000035862 | down |

|      |              |              |             |             |      |
|------|--------------|--------------|-------------|-------------|------|
| 1394 | A_64_P109814 | Hscb         | 2.435944899 | 8.67846E-05 | down |
| 1395 | A_44_P150471 | Gpr88        | 2.435425075 | 6.99471E-05 | down |
| 1396 | A_64_P015886 | Slc35e3      | 2.43503476  | 9.4193E-06  | down |
| 1397 | A_44_P757980 | Eif4ebp2     | 2.425620189 | 5.56737E-05 | down |
| 1398 | A_64_P028345 | Ift81        | 2.421607251 | 0.000493564 | down |
| 1399 | A_43_P18844  | Mtap         | 2.421241303 | 0.000562996 | down |
| 1400 | A_64_P152888 | Nphp4        | 2.420966025 | 0.003746517 | down |
| 1401 | A_44_P876363 | Vav2         | 2.420959984 | 0.000425131 | down |
| 1402 | A_64_P112896 | Klk1c6       | 2.41945784  | 0.044545227 | down |
| 1403 | A_44_P102661 | Spata7       | 2.417973556 | 0.000154546 | down |
| 1404 | A_44_P387308 | Adamtsl4     | 2.414522376 | 4.34314E-05 | down |
| 1405 | A_44_P308673 | Commd5       | 2.413017703 | 0.000376383 | down |
| 1406 | A_64_P101046 | Suv420h2     | 2.412562527 | 0.000622852 | down |
| 1407 | A_64_P140081 | Tsc22d4      | 2.409448391 | 0.018759192 | down |
| 1408 | A_64_P142166 | Polq         | 2.40822908  | 0.015228918 | down |
| 1409 | A_43_P17160  | Ppil2        | 2.406022888 | 0.005301794 | down |
| 1410 | A_64_P081501 | Mcm7         | 2.405768795 | 1.83292E-05 | down |
| 1411 | A_64_P105278 | Lphn2        | 2.404816256 | 0.000331459 | down |
| 1412 | A_64_P138513 | Sfxn1        | 2.404745414 | 0.045455277 | down |
| 1413 | A_44_P469040 | Fam118a      | 2.403232842 | 0.000529037 | down |
| 1414 | A_44_P185351 | RGD1565752   | 2.402069566 | 0.000145139 | down |
| 1415 | A_42_P634149 | Cryba2       | 2.400739221 | 0.042204827 | down |
| 1416 | A_64_P017796 | Pex5         | 2.399091918 | 0.001675007 | down |
| 1417 | A_44_P478298 | Agap3        | 2.398264035 | 0.006349133 | down |
| 1418 | A_64_P223344 | Sgk3         | 2.395874213 | 0.001186185 | down |
| 1419 | A_64_P150156 | Caskin1      | 2.390625979 | 0.000335786 | down |
| 1420 | A_42_P515876 | Rnpep        | 2.389704392 | 0.000198621 | down |
| 1421 | A_43_P11613  | Anp32a       | 2.389548252 | 0.0009314   | down |
| 1422 | A_44_P158216 | Pik3r2       | 2.387483893 | 1.35631E-06 | down |
| 1423 | A_64_P098544 | Spic         | 2.385329112 | 0.001696751 | down |
| 1424 | A_64_P000001 | Rnf187       | 2.383259422 | 0.001546539 | down |
| 1425 | A_43_P12678  | Pias3        | 2.382888368 | 2.33009E-05 | down |
| 1426 | A_64_P085467 | Tbccd1       | 2.382492215 | 0.001274064 | down |
| 1427 | A_43_P12631  | Capn10       | 2.382340565 | 0.000504798 | down |
| 1428 | A_44_P447585 | LOC100310874 | 2.38207725  | 1.16245E-06 | down |
| 1429 | A_43_P19656  | Mgat4b       | 2.381003817 | 0.004396555 | down |
| 1430 | A_64_P011291 | Zfp426l2     | 2.380934392 | 1.82906E-05 | down |
| 1431 | A_64_P055669 | Pcdha1       | 2.380464202 | 0.047419152 | down |
| 1432 | A_44_P438090 | Plcb3        | 2.376389523 | 0.010275381 | down |
| 1433 | A_64_P129063 | Hirip3       | 2.375201375 | 3.34546E-05 | down |
| 1434 | A_64_P089145 | Bin2         | 2.374261048 | 0.003172842 | down |
| 1435 | A_44_P157652 | Aes          | 2.372321655 | 0.001292557 | down |
| 1436 | A_42_P776018 | Stard4       | 2.371707892 | 2.50862E-07 | down |
| 1437 | A_64_P081546 | Plag1        | 2.371096972 | 0.003559416 | down |
| 1438 | A_64_P077806 | Lipt2        | 2.369023156 | 7.37146E-06 | down |
| 1439 | A_43_P16688  | Katnb1       | 2.364289008 | 0.018038579 | down |
| 1440 | A_64_P042480 | Sgol2        | 2.361375434 | 0.000222277 | down |
| 1441 | A_64_P048384 | Wdr6         | 2.361327968 | 1.66389E-08 | down |
| 1442 | A_64_P133355 | Ppapdc3      | 2.361085578 | 0.000022212 | down |
| 1443 | A_42_P482623 | Dstyk        | 2.359869476 | 0.000245504 | down |
| 1444 | A_44_P170396 | Timm44       | 2.358656453 | 0.005301224 | down |



|      |               |            |             |             |      |
|------|---------------|------------|-------------|-------------|------|
| 1445 | A_44_P473314  | RGD1309522 | 2.358325737 | 0.000177986 | down |
| 1446 | A_44_P119177  | Parp2      | 2.357055561 | 1.38564E-05 | down |
| 1447 | A_43_P18603   | Nek4       | 2.356432899 | 4.49203E-06 | down |
| 1448 | A_43_P10405   | Klhdc5     | 2.354226508 | 0.001218554 | down |
| 1449 | A_44_P429066  | Ankrd16    | 2.349168395 | 1.71238E-06 | down |
| 1450 | A_44_P536749  | Metap1d    | 2.344124561 | 0.000263912 | down |
| 1451 | A_64_P129618  | Mdm1       | 2.343772814 | 0.000670875 | down |
| 1452 | A_44_P140416  | Ccdc77     | 2.343069476 | 0.02148969  | down |
| 1453 | A_44_P1022237 | Rab26      | 2.342849314 | 2.14609E-06 | down |
| 1454 | A_44_P340375  | RGD1564209 | 2.341766829 | 0.000149295 | down |
| 1455 | A_42_P766913  | Ccdc28b    | 2.339888309 | 0.000273753 | down |
| 1456 | A_44_P286226  | Hnrnph3    | 2.339107285 | 0.025470088 | down |
| 1457 | A_64_P235760  | Trpc2      | 2.339053186 | 1.66737E-05 | down |
| 1458 | A_64_P146532  | Fbxo25     | 2.338171361 | 9.89292E-06 | down |
| 1459 | A_64_P160255  | Zfp709l2   | 2.337277826 | 1.59967E-05 | down |
| 1460 | A_44_P944998  | LOC690344  | 2.337144605 | 0.005044257 | down |
| 1461 | A_64_P029720  | Pex10      | 2.33557596  | 0.0012598   | down |
| 1462 | A_44_P1057272 | Ehmt2      | 2.334271169 | 0.000446696 | down |
| 1463 | A_44_P424658  | Timmdc1    | 2.329167941 | 0.002504308 | down |
| 1464 | A_44_P445694  | Wdr91      | 2.328677413 | 0.000202201 | down |
| 1465 | A_64_P041842  | Zfp386     | 2.327851455 | 1.71376E-05 | down |
| 1466 | A_64_P101301  | Clec4a3    | 2.324432718 | 1.49577E-05 | down |
| 1467 | A_64_P047701  | Ticam2     | 2.321418931 | 0.001550495 | down |
| 1468 | A_44_P274650  | Zfp691     | 2.320451269 | 0.043429534 | down |
| 1469 | A_64_P062084  | Birc6      | 2.318704277 | 0.024351309 | down |
| 1470 | A_64_P110654  | Slc25a26   | 2.318290191 | 0.000430251 | down |
| 1471 | A_44_P470824  | Trip13     | 2.31770101  | 5.32551E-06 | down |
| 1472 | A_44_P442780  | Kcnab1     | 2.315542655 | 0.000888954 | down |
| 1473 | A_44_P322860  | Camkk1     | 2.312888044 | 0.010041478 | down |
| 1474 | A_44_P550697  | Ankrd32    | 2.312452075 | 1.92231E-05 | down |
| 1475 | A_64_P076470  | Pcdhb17    | 2.30820293  | 0.001750707 | down |
| 1476 | A_44_P178240  | Rrs1       | 2.306103078 | 0.018650776 | down |
| 1477 | A_64_P079731  | Zfyve21    | 2.304818534 | 0.000461992 | down |
| 1478 | A_64_P074574  | Pddc1      | 2.304616981 | 0.034285376 | down |
| 1479 | A_43_P18203   | Sf3a3      | 2.302025104 | 0.011615501 | down |
| 1480 | A_64_P088680  | LOC680377  | 2.301455105 | 0.00341706  | down |
| 1481 | A_64_P152993  | Sipa1l1    | 2.300215188 | 0.000280703 | down |
| 1482 | A_44_P268215  | Maz        | 2.299957921 | 0.00625324  | down |
| 1483 | A_44_P477650  | Adap2      | 2.294066162 | 0.001375761 | down |
| 1484 | A_44_P149267  | Slc38a6    | 2.288837648 | 0.000554076 | down |
| 1485 | A_44_P384677  | Rtn4ip1    | 2.288552096 | 0.001444269 | down |
| 1486 | A_44_P1002141 | Tsen34     | 2.28754586  | 0.00010059  | down |
| 1487 | A_44_P396320  | Ercc6l     | 2.287309723 | 0.000399572 | down |
| 1488 | A_64_P064028  | Fgfr2      | 2.287181464 | 0.022052094 | down |
| 1489 | A_44_P520829  | Pik3r4     | 2.285985628 | 5.41966E-07 | down |
| 1490 | A_44_P346848  | Tmem177    | 2.285345781 | 0.000337141 | down |
| 1491 | A_44_P1015388 | Ankrd24    | 2.284347289 | 3.07258E-06 | down |
| 1492 | A_44_P176501  | Rrp15      | 2.283332668 | 0.015193856 | down |
| 1493 | A_44_P245795  | Ccdc88b    | 2.283260867 | 0.004850902 | down |
| 1494 | A_64_P080316  | Nr2f6      | 2.282514196 | 6.83608E-05 | down |
| 1495 | A_64_P050734  | Tdrkh      | 2.28158816  | 0.011585779 | down |

|      |               |            |             |             |      |
|------|---------------|------------|-------------|-------------|------|
| 1496 | A_44_P900001  | Arhgef15   | 2.276344852 | 0.019069814 | down |
| 1497 | A_44_P353836  | RGD1306962 | 2.275983712 | 5.34261E-05 | down |
| 1498 | A_64_P018412  | LOC684439  | 2.275521525 | 4.48776E-06 | down |
| 1499 | A_44_P315886  | Magi3      | 2.273150703 | 4.06057E-06 | down |
| 1500 | A_44_P434088  | Rnf145     | 2.271557986 | 0.000951447 | down |
| 1501 | A_64_P094541  | Pkd1       | 2.270980209 | 0.004792053 | down |
| 1502 | A_64_P117914  | Phf14      | 2.270724533 | 0.00041895  | down |
| 1503 | A_44_P506273  | Neil3      | 2.270435155 | 0.00017526  | down |
| 1504 | A_44_P479359  | Mvk        | 2.269651827 | 9.21817E-06 | down |
| 1505 | A_44_P333209  | Rnf113a1   | 2.268240946 | 0.010442824 | down |
| 1506 | A_64_P091008  | RGD1306271 | 2.268123242 | 0.044631949 | down |
| 1507 | A_44_P1019654 | Erc5       | 2.26789524  | 7.52198E-05 | down |
| 1508 | A_44_P998128  | Brd3       | 2.26686111  | 0.01131203  | down |
| 1509 | A_42_P811308  | Phf21a     | 2.266599351 | 0.000128664 | down |
| 1510 | A_44_P115048  | Terf2ip    | 2.262615647 | 1.35048E-05 | down |
| 1511 | A_44_P242958  | Ttpa       | 2.26247973  | 0.000204187 | down |
| 1512 | A_64_P090408  | Dip2a      | 2.261944033 | 0.003679451 | down |
| 1513 | A_44_P443976  | St3gal3    | 2.259559582 | 0.002361002 | down |
| 1514 | A_64_P026003  | Sec61gl    | 2.257175612 | 0.008743375 | down |
| 1515 | A_64_P042991  | Dnaja3     | 2.256975566 | 0.00946777  | down |
| 1516 | A_64_P050660  | Tnfaip8l2  | 2.255246037 | 5.43151E-07 | down |
| 1517 | A_42_P591245  | Gcdh       | 2.254679963 | 0.000106334 | down |
| 1518 | A_42_P456701  | Mtfmt      | 2.254335386 | 6.78473E-05 | down |
| 1519 | A_44_P140275  | Alpk1      | 2.253367728 | 0.002063908 | down |
| 1520 | A_64_P064321  | Scrn3      | 2.252790466 | 0.000683518 | down |
| 1521 | A_44_P182257  | Stx17      | 2.251594194 | 0.008924853 | down |
| 1522 | A_42_P832422  | Mllt3      | 2.250456845 | 2.21407E-05 | down |
| 1523 | A_44_P227604  | Eme1       | 2.250303253 | 0.005235366 | down |
| 1524 | A_44_P607486  | Foxn3      | 2.249572193 | 3.56032E-06 | down |
| 1525 | A_64_P045779  | Plcl2      | 2.248719374 | 0.030242633 | down |
| 1526 | A_44_P623426  | Rad51ap1   | 2.248485115 | 0.000122423 | down |
| 1527 | A_64_P031417  | Clecsf6    | 2.248247711 | 2.39535E-05 | down |
| 1528 | A_42_P565275  | Aspm       | 2.247454123 | 1.71653E-07 | down |
| 1529 | A_64_P080144  | Btbd6      | 2.247056292 | 5.70678E-06 | down |
| 1530 | A_64_P109457  | Kif2c      | 2.244233311 | 1.30671E-05 | down |
| 1531 | A_64_P041476  | LOC498368  | 2.241953828 | 2.24696E-06 | down |
| 1532 | A_44_P558652  | RGD1565983 | 2.241886281 | 0.000970105 | down |
| 1533 | A_44_P144943  | Wdr83      | 2.241461884 | 0.00065544  | down |
| 1534 | A_44_P191941  | Pex6       | 2.241432468 | 0.007396054 | down |
| 1535 | A_64_P042455  | Bloc1s3    | 2.240046737 | 5.43883E-07 | down |
| 1536 | A_44_P482595  | F11r       | 2.240023188 | 0.000187272 | down |
| 1537 | A_44_P105377  | Cenpb      | 2.238729001 | 0.00071284  | down |
| 1538 | A_42_P458494  | Acsf2      | 2.238602742 | 0.00491409  | down |
| 1539 | A_64_P162589  | Slc12a8    | 2.238317303 | 0.000075965 | down |
| 1540 | A_42_P691249  | Plekhn1    | 2.236400646 | 5.01994E-05 | down |
| 1541 | A_44_P1021489 | Palb2      | 2.232858302 | 0.000139688 | down |
| 1542 | A_43_P19743   | Krtcap3    | 2.226848176 | 0.019797572 | down |
| 1543 | A_44_P435016  | Nudt2      | 2.226631783 | 7.0216E-06  | down |
| 1544 | A_44_P1013405 | Acy3       | 2.226489796 | 8.63778E-05 | down |
| 1545 | A_64_P092728  | Uxs1       | 2.225649893 | 0.008236089 | down |
| 1546 | A_64_P009047  | Nt5c3l     | 2.225276333 | 0.000128464 | down |

|      |              |              |             |             |      |
|------|--------------|--------------|-------------|-------------|------|
| 1547 | A_42_P605985 | Ddit4        | 2.225205742 | 0.004667035 | down |
| 1548 | A_43_P12875  | Bbs2         | 2.225181989 | 0.000768388 | down |
| 1549 | A_44_P102652 | lkbkap       | 2.225172375 | 4.21598E-05 | down |
| 1550 | A_64_P164736 | LOC10035993C | 2.225075773 | 0.002634582 | down |
| 1551 | A_64_P159722 | Bub1         | 2.225044824 | 8.77089E-05 | down |
| 1552 | A_42_P763553 | Opa3         | 2.222670872 | 0.009778823 | down |
| 1553 | A_42_P679092 | H6pd         | 2.221531503 | 2.09526E-05 | down |
| 1554 | A_64_P265262 | Med20        | 2.219765742 | 0.019051309 | down |
| 1555 | A_64_P047445 | Tnfaip8      | 2.218489923 | 0.000476187 | down |
| 1556 | A_44_P713838 | Tyw3         | 2.218092658 | 0.003233804 | down |
| 1557 | A_44_P140314 | Cdc25c       | 2.21717411  | 0.02288434  | down |
| 1558 | A_64_P154711 | Olr907       | 2.214708105 | 0.001036587 | down |
| 1559 | A_64_P031383 | Adam15       | 2.213125094 | 0.003228225 | down |
| 1560 | A_64_P147659 | Tp53i13      | 2.212987088 | 0.003700282 | down |
| 1561 | A_64_P149819 | Fam134a      | 2.212434381 | 6.26532E-07 | down |
| 1562 | A_42_P834903 | Bckdk        | 2.211775567 | 5.06979E-05 | down |
| 1563 | A_44_P490117 | Mbip         | 2.21140781  | 5.55063E-06 | down |
| 1564 | A_64_P116288 | Lztf11       | 2.211097025 | 0.000173388 | down |
| 1565 | A_64_P067868 | B3gnt9       | 2.210858359 | 0.018724149 | down |
| 1566 | A_64_P066271 | Mxi1         | 2.209798259 | 2.4371E-06  | down |
| 1567 | A_64_P018582 | Pura         | 2.208877635 | 0.004700072 | down |
| 1568 | A_64_P130074 | Pot1b        | 2.207294711 | 1.19801E-06 | down |
| 1569 | A_43_P16070  | Axl          | 2.206581448 | 0.001025485 | down |
| 1570 | A_64_P022730 | RGD1306282   | 2.203512428 | 0.004872833 | down |
| 1571 | A_64_P132497 | LOC685634    | 2.202349091 | 0.000079861 | down |
| 1572 | A_44_P132733 | Olr339       | 2.201721005 | 0.037660028 | down |
| 1573 | A_43_P15304  | Grb2         | 2.201237533 | 0.00137388  | down |
| 1574 | A_64_P112816 | Gen1         | 2.200483011 | 0.002202017 | down |
| 1575 | A_44_P853289 | RGD1359158   | 2.200096544 | 0.000254934 | down |
| 1576 | A_64_P092906 | Rnf8         | 2.199610228 | 1.27299E-05 | down |
| 1577 | A_44_P372181 | Dbt          | 2.198222875 | 1.56702E-06 | down |
| 1578 | A_64_P119199 | RGD1561270   | 2.198022417 | 0.000420273 | down |
| 1579 | A_64_P362701 | RGD1563714   | 2.197537981 | 0.001106916 | down |
| 1580 | A_64_P033939 | Mcm4         | 2.197218128 | 0.000743432 | down |
| 1581 | A_44_P458878 | Tcf19        | 2.197205284 | 1.92917E-07 | down |
| 1582 | A_64_P023421 | Hebp2        | 2.196126412 | 2.49379E-05 | down |
| 1583 | A_64_P123804 | Clec4a2      | 2.194645874 | 9.05726E-06 | down |
| 1584 | A_44_P391706 | Abcb8        | 2.192762002 | 0.004280978 | down |
| 1585 | A_44_P548726 | Zfp414       | 2.189962147 | 0.010092967 | down |
| 1586 | A_44_P328815 | Smarcal1     | 2.189945045 | 0.000840247 | down |
| 1587 | A_44_P504274 | D2hgdh       | 2.188597314 | 0.001147769 | down |
| 1588 | A_64_P088305 | RGD1565129   | 2.188307026 | 0.0166545   | down |
| 1589 | A_64_P123346 | Xdh          | 2.187945294 | 1.25502E-06 | down |
| 1590 | A_64_P025481 | Ddhd2        | 2.187394799 | 0.005427603 | down |
| 1591 | A_44_P431198 | Pycr2        | 2.187250715 | 0.00033466  | down |
| 1592 | A_44_P419265 | Zscan12      | 2.18696384  | 1.01861E-06 | down |
| 1593 | A_44_P281086 | Siva1        | 2.186290586 | 2.79282E-05 | down |
| 1594 | A_64_P059545 | Mlycd        | 2.185273723 | 2.61852E-06 | down |
| 1595 | A_44_P337991 | Acot3        | 2.185250497 | 0.000161746 | down |
| 1596 | A_43_P18505  | Rnf135       | 2.183955308 | 0.000319555 | down |
| 1597 | A_43_P10136  | Amz2         | 2.183713113 | 2.98746E-06 | down |

|      |               |           |             |             |      |
|------|---------------|-----------|-------------|-------------|------|
| 1598 | A_42_P560781  | Vamp1     | 2.183395676 | 0.002077061 | down |
| 1599 | A_42_P795269  | Hspc159   | 2.18129516  | 1.19036E-07 | down |
| 1600 | A_64_P066841  | Batf3     | 2.181055981 | 0.002812458 | down |
| 1601 | A_64_P157126  | Tstd2     | 2.180836278 | 0.002282309 | down |
| 1602 | A_64_P152403  | E4f1      | 2.180809371 | 0.001326945 | down |
| 1603 | A_64_P111179  | Vom1r100  | 2.179503268 | 0.005187263 | down |
| 1604 | A_44_P342966  | Rwdd3     | 2.179229442 | 0.001752387 | down |
| 1605 | A_44_P304190  | Tifa      | 2.179033939 | 3.39619E-05 | down |
| 1606 | A_64_P111300  | LOC678880 | 2.178571808 | 1.30178E-05 | down |
| 1607 | A_43_P21295   | Cdc7      | 2.177444027 | 0.018032941 | down |
| 1608 | A_44_P199469  | Gsdmd     | 2.176778331 | 6.67277E-06 | down |
| 1609 | A_44_P338068  | Ccdc134   | 2.174723473 | 0.001648441 | down |
| 1610 | A_44_P114023  | Mis12     | 2.174267129 | 0.003142602 | down |
| 1611 | A_64_P033416  | Tbc1d17   | 2.174169874 | 0.002530157 | down |
| 1612 | A_64_P036820  | Fam109b   | 2.173274638 | 0.000163393 | down |
| 1613 | A_64_P151415  | Fancl     | 2.170694453 | 7.70024E-07 | down |
| 1614 | A_44_P323678  | Depdc1b   | 2.170122225 | 0.000689499 | down |
| 1615 | A_42_P663350  | Shpk      | 2.168975114 | 1.19992E-05 | down |
| 1616 | A_44_P995316  | Sgpp1     | 2.167304957 | 3.13094E-05 | down |
| 1617 | A_42_P771346  | Acvrl1    | 2.166895129 | 0.000209004 | down |
| 1618 | A_64_P001036  | Acsf3     | 2.166502798 | 0.000107677 | down |
| 1619 | A_44_P852017  | Gpr146    | 2.165425493 | 0.000126976 | down |
| 1620 | A_64_P129805  | Rfc2      | 2.163374354 | 0.000872588 | down |
| 1621 | A_64_P100933  | Pomt2     | 2.163174875 | 0.002148576 | down |
| 1622 | A_44_P947801  | Gli4      | 2.162971666 | 0.000171283 | down |
| 1623 | A_64_P104988  | Tonsl     | 2.161961952 | 0.000452298 | down |
| 1624 | A_64_P162860  | LOC686961 | 2.16180321  | 0.006300467 | down |
| 1625 | A_44_P520190  | Exoc2     | 2.161667705 | 0.001086018 | down |
| 1626 | A_44_P349539  | Elmo2     | 2.16153061  | 0.001961888 | down |
| 1627 | A_44_P998015  | Cdc42ep3  | 2.160844616 | 6.33823E-06 | down |
| 1628 | A_44_P548842  | Inpp5k    | 2.160801181 | 9.29614E-05 | down |
| 1629 | A_64_P123266  | Dab2ip    | 2.159644476 | 3.33779E-05 | down |
| 1630 | A_44_P332896  | Kctd14    | 2.157003823 | 0.011234957 | down |
| 1631 | A_44_P1038655 | Ttc25     | 2.155509469 | 0.001144612 | down |
| 1632 | A_64_P050229  | LOC686765 | 2.154654324 | 0.000157975 | down |
| 1633 | A_64_P050903  | Preli2    | 2.153879192 | 0.005001462 | down |
| 1634 | A_42_P788040  | Galnt4    | 2.152525855 | 0.000308245 | down |
| 1635 | A_64_P129770  | Tada2a    | 2.152043341 | 0.000245274 | down |
| 1636 | A_43_P15533   | Cebpe     | 2.151194542 | 5.44149E-05 | down |
| 1637 | A_44_P318444  | Bco2      | 2.150761075 | 0.011041273 | down |
| 1638 | A_44_P508935  | Ptplad2   | 2.14857544  | 0.00016971  | down |
| 1639 | A_64_P150187  | Pcbp4     | 2.146136443 | 0.01367322  | down |
| 1640 | A_64_P017786  | Specc1    | 2.145912721 | 0.004499059 | down |
| 1641 | A_42_P749435  | Ap1s1     | 2.144176499 | 0.001952478 | down |
| 1642 | A_64_P085053  | Scly      | 2.14177184  | 2.17871E-05 | down |
| 1643 | A_64_P166385  | Kifc1     | 2.141104188 | 0.000233672 | down |
| 1644 | A_64_P078664  | Slc20a2   | 2.140577743 | 0.001575556 | down |
| 1645 | A_44_P387344  | Atad5     | 2.140553905 | 0.01398032  | down |
| 1646 | A_64_P107439  | Camsap1   | 2.140196952 | 3.29154E-05 | down |
| 1647 | A_64_P151448  | Fancf     | 2.139166187 | 0.000929933 | down |
| 1648 | A_44_P541692  | Hexim2    | 2.139161838 | 0.000184538 | down |

|      |               |            |             |             |      |
|------|---------------|------------|-------------|-------------|------|
| 1649 | A_44_P389019  | RT1-CE10   | 2.138640861 | 0.037733017 | down |
| 1650 | A_44_P530547  | Prom2      | 2.138225782 | 6.61935E-05 | down |
| 1651 | A_43_P11329   | Zfp574     | 2.136163391 | 0.037525713 | down |
| 1652 | A_64_P032479  | Sp4        | 2.135902413 | 0.001242509 | down |
| 1653 | A_43_P10919   | Exosc8     | 2.135440302 | 0.00175447  | down |
| 1654 | A_64_P129157  | Ttf1       | 2.134292636 | 0.005244037 | down |
| 1655 | A_44_P161797  | Fam116b    | 2.133409531 | 0.000892164 | down |
| 1656 | A_44_P395538  | Rabep2     | 2.132669882 | 4.91655E-05 | down |
| 1657 | A_42_P704583  | LOC690349  | 2.131855027 | 5.37774E-05 | down |
| 1658 | A_44_P336608  | RGD1565496 | 2.131154225 | 3.70193E-05 | down |
| 1659 | A_44_P276562  | Pm20d1     | 2.129867034 | 0.021257889 | down |
| 1660 | A_43_P15577   | Rab11b     | 2.128913747 | 0.006198003 | down |
| 1661 | A_44_P910533  | Chaf1a     | 2.128062467 | 0.000479905 | down |
| 1662 | A_44_P237994  | Abcg1      | 2.126370508 | 0.001456207 | down |
| 1663 | A_64_P138565  | Narf       | 2.126257021 | 4.58972E-08 | down |
| 1664 | A_44_P297428  | Ncapg      | 2.125221677 | 0.016693602 | down |
| 1665 | A_64_P122178  | Zfp40      | 2.123304872 | 0.00348595  | down |
| 1666 | A_64_P035041  | Zfp111     | 2.122823022 | 0.001492266 | down |
| 1667 | A_42_P621628  | Fam63a     | 2.122757397 | 0.002365304 | down |
| 1668 | A_64_P070108  | Trim39     | 2.122517821 | 0.007490784 | down |
| 1669 | A_44_P107634  | Haus4      | 2.121798027 | 1.82965E-05 | down |
| 1670 | A_64_P011849  | Fam3a      | 2.121685961 | 9.61412E-05 | down |
| 1671 | A_44_P282433  | Akt1       | 2.121052014 | 0.002770137 | down |
| 1672 | A_44_P139730  | Palm       | 2.119797862 | 2.95745E-06 | down |
| 1673 | A_64_P007439  | Kcnc3      | 2.119481392 | 0.000213649 | down |
| 1674 | A_44_P423662  | Sh3bp5     | 2.119159484 | 1.42308E-05 | down |
| 1675 | A_64_P004725  | Akap7      | 2.119106752 | 0.000269429 | down |
| 1676 | A_44_P470884  | Prc1       | 2.117812843 | 0.045681519 | down |
| 1677 | A_44_P388755  | Kif15      | 2.116378989 | 3.29145E-05 | down |
| 1678 | A_64_P113493  | Nsf        | 2.116376984 | 7.99299E-05 | down |
| 1679 | A_44_P466614  | Lactb2     | 2.116128153 | 1.31305E-06 | down |
| 1680 | A_64_P023250  | Ascl2      | 2.114515448 | 0.033723658 | down |
| 1681 | A_42_P499282  | Msrb2      | 2.114309629 | 4.61254E-05 | down |
| 1682 | A_64_P152818  | Camta2     | 2.113496271 | 0.007585756 | down |
| 1683 | A_44_P337094  | Prkag1     | 2.112763574 | 0.000654755 | down |
| 1684 | A_43_P17786   | Setmar     | 2.111432071 | 1.96343E-05 | down |
| 1685 | A_64_P022511  | Casc5      | 2.110068255 | 0.000353901 | down |
| 1686 | A_64_P146762  | LOC686264  | 2.109300731 | 0.026772522 | down |
| 1687 | A_44_P1034155 | LOC686234  | 2.109242054 | 0.000396243 | down |
| 1688 | A_64_P029636  | Gtpbp10    | 2.107783955 | 7.80689E-05 | down |
| 1689 | A_44_P807091  | Cd2bp2     | 2.107239703 | 0.000999604 | down |
| 1690 | A_64_P100225  | LOC679038  | 2.106805893 | 0.000670444 | down |
| 1691 | A_64_P010613  | Asf1a      | 2.106725723 | 0.001091883 | down |
| 1692 | A_64_P055748  | Rhbdf1     | 2.106553661 | 0.006222985 | down |
| 1693 | A_64_P047688  | Igbp1      | 2.105992064 | 0.002009789 | down |
| 1694 | A_44_P1033023 | Parp1      | 2.105367379 | 2.48622E-05 | down |
| 1695 | A_64_P273080  | Pdxk       | 2.103488552 | 0.000832456 | down |
| 1696 | A_64_P138776  | Scarb1     | 2.102461089 | 0.00755192  | down |
| 1697 | A_44_P471233  | Sash3      | 2.102096111 | 0.048831274 | down |
| 1698 | A_64_P136382  | Acvr1      | 2.101996888 | 0.000060304 | down |
| 1699 | A_42_P537971  | Pard6b     | 2.101751205 | 6.63175E-06 | down |

|      |               |            |             |             |      |
|------|---------------|------------|-------------|-------------|------|
| 1700 | A_44_P344928  | RGD1563375 | 2.100608977 | 0.011987527 | down |
| 1701 | A_44_P307837  | Gfer       | 2.100501331 | 0.000299608 | down |
| 1702 | A_44_P990937  | Smarca4    | 2.100097876 | 0.040197849 | down |
| 1703 | A_43_P12346   | Mertk      | 2.100022133 | 0.000241173 | down |
| 1704 | A_43_P10088   | Rnaseh2a   | 2.099036858 | 0.000218659 | down |
| 1705 | A_44_P538970  | Ptpdc1     | 2.09827611  | 0.048259774 | down |
| 1706 | A_43_P15701   | Rab13      | 2.095914696 | 0.000454561 | down |
| 1707 | A_64_P061212  | Zfp703     | 2.095874551 | 0.031991834 | down |
| 1708 | A_64_P128590  | Slc16a14   | 2.095174201 | 0.015714982 | down |
| 1709 | A_64_P143966  | Pigh       | 2.094851484 | 0.000710227 | down |
| 1710 | A_44_P543957  | Wdr18      | 2.093312887 | 0.004428249 | down |
| 1711 | A_64_P120529  | Npat       | 2.093160105 | 0.003042399 | down |
| 1712 | A_64_P115142  | Accs       | 2.092739153 | 0.000199939 | down |
| 1713 | A_44_P522369  | Pld2       | 2.092066919 | 0.000281036 | down |
| 1714 | A_42_P735730  | Dapp1      | 2.09044246  | 0.000313814 | down |
| 1715 | A_44_P360804  | Mpg        | 2.090168813 | 6.32012E-06 | down |
| 1716 | A_64_P059032  | Susd3      | 2.087869441 | 7.83499E-06 | down |
| 1717 | A_44_P530637  | Gmppa      | 2.086506044 | 0.010224487 | down |
| 1718 | A_64_P011869  | Fam3d      | 2.085346084 | 0.000215659 | down |
| 1719 | A_64_P044668  | LOC691849  | 2.085331871 | 5.56381E-05 | down |
| 1720 | A_64_P075647  | Lmnb1      | 2.084988028 | 0.006371173 | down |
| 1721 | A_44_P132039  | Yipf2      | 2.084496573 | 0.003495951 | down |
| 1722 | A_64_P088247  | Prrt1      | 2.083614237 | 3.2937E-06  | down |
| 1723 | A_43_P20107   | Rfx3       | 2.082447609 | 0.000309889 | down |
| 1724 | A_64_P036049  | Me2        | 2.082425957 | 0.0010494   | down |
| 1725 | A_43_P21660   | Sun1       | 2.082409406 | 0.002082568 | down |
| 1726 | A_64_P016761  | Zdhhc9     | 2.081790898 | 0.018609532 | down |
| 1727 | A_64_P088034  | Tmem186    | 2.080715717 | 0.008229999 | down |
| 1728 | A_44_P943756  | Ccdc82     | 2.080383883 | 7.32639E-05 | down |
| 1729 | A_44_P335734  | Pigq       | 2.080338557 | 0.000139997 | down |
| 1730 | A_64_P153576  | LOC500684  | 2.079288627 | 0.009024479 | down |
| 1731 | A_64_P070818  | Cnpy2      | 2.079059432 | 9.61079E-05 | down |
| 1732 | A_64_P099293  | Slc4a5     | 2.077382819 | 0.013400088 | down |
| 1733 | A_43_P22110   | Nfatc2ip   | 2.076941479 | 0.038338719 | down |
| 1734 | A_64_P118352  | Msl3l2     | 2.076405719 | 6.47163E-06 | down |
| 1735 | A_44_P711020  | Znrf2      | 2.0725305   | 0.006021552 | down |
| 1736 | A_42_P555140  | Izumo4     | 2.071778689 | 0.00018138  | down |
| 1737 | A_44_P381069  | Glul       | 2.070925517 | 0.000394588 | down |
| 1738 | A_64_P102176  | Myo18a     | 2.070578644 | 0.013210257 | down |
| 1739 | A_43_P16804   | Pole3      | 2.070407717 | 0.004307088 | down |
| 1740 | A_44_P197086  | Rpusd4     | 2.070302145 | 0.000127052 | down |
| 1741 | A_64_P246797  | Hnrnpa3    | 2.070114356 | 0.028304681 | down |
| 1742 | A_43_P17861   | Tfdp2      | 2.069527664 | 9.0449E-06  | down |
| 1743 | A_64_P016241  | LOC684993  | 2.068555023 | 8.58419E-06 | down |
| 1744 | A_44_P157078  | RGD1305089 | 2.067635962 | 0.015075994 | down |
| 1745 | A_44_P131012  | Orc5       | 2.06756932  | 3.98959E-05 | down |
| 1746 | A_44_P1006090 | Spg20      | 2.067413115 | 0.034923179 | down |
| 1747 | A_42_P573232  | Ube2k      | 2.066808373 | 0.000051514 | down |
| 1748 | A_43_P11268   | Cdkn1b     | 2.065748089 | 0.000567002 | down |
| 1749 | A_44_P102061  | Zc3h7b     | 2.065166356 | 0.001140838 | down |
| 1750 | A_44_P490159  | Fam118b    | 2.063791797 | 0.000233633 | down |

|      |               |            |             |             |      |
|------|---------------|------------|-------------|-------------|------|
| 1751 | A_44_P1009603 | Gtse1      | 2.062771379 | 0.000843241 | down |
| 1752 | A_44_P929695  | Cdk19      | 2.062566546 | 0.000499033 | down |
| 1753 | A_44_P762828  | LOC497978  | 2.061927157 | 0.004446319 | down |
| 1754 | A_42_P535608  | Asf1b      | 2.061882804 | 0.000016361 | down |
| 1755 | A_44_P365947  | LOC606294  | 2.061408606 | 0.000125284 | down |
| 1756 | A_42_P810736  | Timeless   | 2.059022602 | 0.000688797 | down |
| 1757 | A_44_P548420  | Pmvk       | 2.058687712 | 3.28856E-05 | down |
| 1758 | A_64_P135202  | Snrnp35    | 2.056944213 | 0.004359643 | down |
| 1759 | A_64_P050705  | Arhgef3    | 2.056442928 | 0.017734349 | down |
| 1760 | A_44_P730677  | RGD1311517 | 2.056011499 | 0.00254996  | down |
| 1761 | A_64_P006728  | Zfp524     | 2.055960433 | 0.014188902 | down |
| 1762 | A_64_P042761  | Tcte4      | 2.055910508 | 0.00044369  | down |
| 1763 | A_44_P996124  | Tlr4       | 2.054536556 | 1.32366E-05 | down |
| 1764 | A_44_P301805  | Ryk        | 2.054312178 | 2.64831E-06 | down |
| 1765 | A_44_P187418  | RGD1563825 | 2.054280709 | 0.003270575 | down |
| 1766 | A_42_P715210  | Abcg3l3    | 2.05425954  | 7.21977E-05 | down |
| 1767 | A_44_P140514  | Cenpa      | 2.054140837 | 0.00023205  | down |
| 1768 | A_43_P23014   | Lpxn       | 2.054044115 | 0.00047192  | down |
| 1769 | A_64_P133973  | Abcd1      | 2.053612999 | 0.00067825  | down |
| 1770 | A_44_P368032  | Polr3a     | 2.053062812 | 0.009144989 | down |
| 1771 | A_43_P12540   | Dgkz       | 2.053006222 | 0.012529596 | down |
| 1772 | A_44_P700241  | Usp46      | 2.052717604 | 3.77581E-05 | down |
| 1773 | A_64_P063998  | Ttc4       | 2.050996458 | 0.014519068 | down |
| 1774 | A_64_P062545  | Tmem132a   | 2.049754934 | 0.005710602 | down |
| 1775 | A_44_P504374  | Mettl13    | 2.048269287 | 0.001073209 | down |
| 1776 | A_42_P661069  | Zbtb5      | 2.047803094 | 2.02816E-05 | down |
| 1777 | A_44_P321419  | RGD1561997 | 2.047714334 | 0.000265622 | down |
| 1778 | A_44_P471426  | Traf3ip1   | 2.047226792 | 0.002835462 | down |
| 1779 | A_44_P165692  | RGD1308874 | 2.046800371 | 0.004005769 | down |
| 1780 | A_42_P843603  | Tk1        | 2.044944469 | 4.43228E-05 | down |
| 1781 | A_44_P220575  | Irak4      | 2.044843171 | 0.012910783 | down |
| 1782 | A_64_P033049  | RGD1564791 | 2.044767012 | 0.002824467 | down |
| 1783 | A_64_P107106  | Hmgb2      | 2.044696903 | 0.00286174  | down |
| 1784 | A_42_P821898  | Efcab7     | 2.044401422 | 1.97885E-05 | down |
| 1785 | A_64_P087151  | RGD1560492 | 2.041913663 | 5.74587E-05 | down |
| 1786 | A_44_P159271  | Prr15      | 2.041824639 | 0.002167457 | down |
| 1787 | A_64_P008229  | Evi2a      | 2.039501404 | 8.61605E-06 | down |
| 1788 | A_42_P726293  | Coq9       | 2.03941682  | 7.20367E-05 | down |
| 1789 | A_44_P105680  | Zfp496     | 2.037759511 | 0.005210809 | down |
| 1790 | A_44_P415901  | Mrpl15     | 2.037567283 | 7.09134E-06 | down |
| 1791 | A_44_P417658  | Tfpt       | 2.037333226 | 0.014179621 | down |
| 1792 | A_44_P403005  | Trub1      | 2.036734412 | 0.000535425 | down |
| 1793 | A_43_P15261   | Nr3c2      | 2.036675919 | 0.000770945 | down |
| 1794 | A_64_P127267  | Dguok      | 2.036601899 | 0.0003573   | down |
| 1795 | A_64_P017821  | Rap2b      | 2.03606549  | 0.011768806 | down |
| 1796 | A_64_P009375  | Hdgf       | 2.036059187 | 0.015581565 | down |
| 1797 | A_44_P426550  | Prss53     | 2.035763496 | 0.000575468 | down |
| 1798 | A_44_P548812  | Telo2      | 2.035258391 | 0.000265301 | down |
| 1799 | A_64_P017243  | Tbc1d8     | 2.034358354 | 0.000522338 | down |
| 1800 | A_64_P028958  | Stard7     | 2.034120059 | 0.000878981 | down |
| 1801 | A_44_P881262  | Ppp2r5e    | 2.033020224 | 3.64698E-05 | down |

|      |              |              |             |             |      |
|------|--------------|--------------|-------------|-------------|------|
| 1802 | A_42_P668682 | Dusp6        | 2.032752638 | 0.000130933 | down |
| 1803 | A_44_P409518 | Gmpr         | 2.032530263 | 0.000312864 | down |
| 1804 | A_44_P541587 | Fbxo9        | 2.031260588 | 0.000279922 | down |
| 1805 | A_64_P156438 | Zfp346       | 2.031225953 | 0.000410668 | down |
| 1806 | A_44_P297645 | Zswim3       | 2.030966909 | 0.006780795 | down |
| 1807 | A_42_P590239 | Crebl2       | 2.029756503 | 7.74047E-06 | down |
| 1808 | A_43_P14655  | Ecsit        | 2.027359824 | 0.00027141  | down |
| 1809 | A_64_P098892 | RGD1563482   | 2.026064355 | 0.00095968  | down |
| 1810 | A_64_P080593 | LOC679825    | 2.025862278 | 0.00045388  | down |
| 1811 | A_44_P294687 | Cdk5         | 2.025528335 | 0.000247382 | down |
| 1812 | A_44_P321622 | Itfg3        | 2.024453913 | 0.000348054 | down |
| 1813 | A_64_P015479 | Rfc5         | 2.023459304 | 0.000310312 | down |
| 1814 | A_42_P493824 | Dok1         | 2.023263189 | 6.79901E-05 | down |
| 1815 | A_64_P044151 | Lrrc14       | 2.022996607 | 0.000375118 | down |
| 1816 | A_44_P544340 | Obfc2b       | 2.021288846 | 0.001218443 | down |
| 1817 | A_44_P191055 | Pogz         | 2.020209858 | 0.000820732 | down |
| 1818 | A_64_P020706 | Hist2h2be    | 2.020138724 | 0.009971884 | down |
| 1819 | A_44_P276227 | Usp19        | 2.019945451 | 0.005956777 | down |
| 1820 | A_44_P260134 | Srcrb4d      | 2.019503808 | 0.02533422  | down |
| 1821 | A_64_P016518 | Ffar2        | 2.019017945 | 0.013693361 | down |
| 1822 | A_44_P649046 | Lrrc20       | 2.018936217 | 3.14425E-05 | down |
| 1823 | A_44_P527185 | Gtf3c1       | 2.017469412 | 0.00427955  | down |
| 1824 | A_64_P136279 | Senp7        | 2.017406298 | 6.11187E-05 | down |
| 1825 | A_42_P605265 | Chek2        | 2.016972014 | 0.000311094 | down |
| 1826 | A_64_P097188 | Zfp94        | 2.016824664 | 3.58292E-06 | down |
| 1827 | A_44_P200636 | Cenpv        | 2.016059196 | 2.15183E-05 | down |
| 1828 | A_64_P004279 | RGD1561472   | 2.016038234 | 0.000695219 | down |
| 1829 | A_64_P016896 | LOC685233    | 2.014476068 | 0.000220665 | down |
| 1830 | A_44_P189026 | B3galnt2     | 2.014317824 | 0.000884322 | down |
| 1831 | A_42_P664274 | RGD1311558   | 2.013817342 | 0.000532872 | down |
| 1832 | A_64_P151071 | Hmgcs1       | 2.013415371 | 3.78836E-07 | down |
| 1833 | A_44_P945669 | Dsn1         | 2.013179948 | 0.000260837 | down |
| 1834 | A_44_P516635 | Arl2         | 2.011754649 | 0.007580706 | down |
| 1835 | A_44_P885147 | Def8         | 2.011527786 | 0.000386769 | down |
| 1836 | A_44_P210892 | Nanp         | 2.011493905 | 0.000156459 | down |
| 1837 | A_44_P995874 | LOC100364597 | 2.011424612 | 0.000183082 | down |
| 1838 | A_42_P841704 | Sh3tc1       | 2.010168353 | 9.93455E-05 | down |
| 1839 | A_64_P096647 | Tmprss5      | 2.009531464 | 0.040042719 | down |
| 1840 | A_44_P368249 | Spag8        | 2.008929264 | 0.003375749 | down |
| 1841 | A_44_P254973 | Trmt11       | 2.00859129  | 0.001112911 | down |
| 1842 | A_44_P449727 | Ttc12        | 2.008424181 | 0.00872153  | down |
| 1843 | A_64_P178339 | Trip11       | 2.00811645  | 0.014993453 | down |
| 1844 | A_64_P057261 | Synj2bp      | 2.007889209 | 2.71599E-05 | down |
| 1845 | A_42_P662683 | Slc41a1      | 2.00776349  | 4.00286E-06 | down |
| 1846 | A_64_P065200 | MGC112715    | 2.006601314 | 6.27113E-05 | down |
| 1847 | A_64_P327151 | Rxb          | 2.005864288 | 0.000529758 | down |
| 1848 | A_44_P506064 | Aldh1l2      | 2.004949316 | 1.56443E-06 | down |
| 1849 | A_43_P17531  | Muted        | 2.003360147 | 0.000240653 | down |
| 1850 | A_43_P12665  | Mmp24        | 2.002347819 | 0.000101992 | down |
| 1851 | A_44_P374741 | Dnmt3a       | 2.001861273 | 0.000579465 | down |
| 1852 | A_42_P603461 | Isoc1        | 2.001474821 | 5.97428E-06 | down |



|      |              |        |             |             |      |
|------|--------------|--------|-------------|-------------|------|
| 1853 | A_64_P128160 | Nisch  | 2.00083158  | 0.006475721 | down |
| 1854 | A_64_P091891 | Zfp217 | 2.000646534 | 0.003911037 | down |

---

**Supplementary Table S2 Aberrantly expressed genes in TGF- $\beta$ -stimulated WI-38 cells**

| No. | Probe Name    | Gene Symbol | Absolute Fold Change<br>([TGF- $\beta$ treatment] vs [Control]) | P-value     | Regulation |
|-----|---------------|-------------|-----------------------------------------------------------------|-------------|------------|
| 1   | A_24_P62659   | TSPAN2      | 400.1120877                                                     | 1.44E-08    | up         |
| 2   | A_24_P264943  | COMP        | 276.9847261                                                     | 1.33E-08    | up         |
| 3   | A_23_P206920  | MYH11       | 188.7076231                                                     | 0.000000325 | up         |
| 4   | A_33_P3369178 | PRG4        | 88.71321276                                                     | 0.0000668   | up         |
| 5   | A_23_P154338  | EFHD1       | 61.66401872                                                     | 0.00000012  | up         |
| 6   | A_23_P155848  | DKK2        | 58.26125762                                                     | 0.0000101   | up         |
| 7   | A_23_P115261  | AGT         | 53.51421876                                                     | 1.16E-08    | up         |
| 8   | A_23_P132378  | CELSR1      | 53.26237691                                                     | 0.0000259   | up         |
| 9   | A_23_P135990  | SLCO2A1     | 52.90122874                                                     | 0.0000335   | up         |
| 10  | A_24_P414803  | PLN         | 48.36087123                                                     | 0.002850672 | up         |
| 11  | A_32_P151544  | KRT18       | 44.39129732                                                     | 0.0000004   | up         |
| 12  | A_23_P137573  | LEFTY2      | 43.93421138                                                     | 0.000000134 | up         |
| 13  | A_23_P46936   | EGR2        | 38.21076123                                                     | 0.000000723 | up         |
| 14  | A_24_P140608  | HBEGF       | 37.70198725                                                     | 0.00000581  | up         |
| 15  | A_33_P3396214 | KREMEN2     | 35.82087121                                                     | 7.37E-08    | up         |
| 16  | A_23_P396858  | FZD8        | 34.69098624                                                     | 6.37E-08    | up         |
| 17  | A_33_P3224324 | NOX4        | 34.16238797                                                     | 0.00000105  | up         |
| 18  | A_23_P1320    | MYOZ1       | 33.59018762                                                     | 2.39E-08    | up         |
| 19  | A_23_P106389  | SEMA7A      | 30.80971821                                                     | 0.00000018  | up         |
| 20  | A_23_P34700   | TNNT2       | 30.78328064                                                     | 0.00000767  | up         |
| 21  | A_24_P304423  | IGF1        | 29.38018761                                                     | 0.000000259 | up         |
| 22  | A_23_P145761  | ARL4A       | 28.65309812                                                     | 0.00000139  | up         |
| 23  | A_23_P21706   | CTPS        | 28.25017681                                                     | 0.000000131 | up         |
| 24  | A_23_P42257   | IER3        | 23.37127692                                                     | 0.000102452 | up         |
| 25  | A_23_P23346   | MLLT11      | 21.76087912                                                     | 0.0000382   | up         |
| 26  | A_23_P500773  | TAK1        | 21.65287691                                                     | 0.0000165   | up         |
| 27  | A_23_P71037   | IL6         | 21.11421081                                                     | 0.000013    | up         |
| 28  | A_23_P348257  | NUAK1       | 20.88087341                                                     | 0.00000158  | up         |
| 29  | A_23_P39766   | GLS         | 20.24398762                                                     | 0.0000398   | up         |
| 30  | A_33_P3249354 | CCDC99      | 19.76156721                                                     | 0.00000848  | up         |
| 31  | A_23_P201731  | TRAF5       | 19.57087132                                                     | 0.00000214  | up         |
| 32  | A_23_P325040  | TMPO        | 19.31129725                                                     | 0.000016    | up         |
| 33  | A_23_P208310  | CD3EAP      | 18.83276971                                                     | 0.0000072   | up         |
| 34  | A_23_P113825  | NACC2       | 17.46176092                                                     | 0.0000087   | up         |
| 35  | A_23_P58321   | CCNA2       | 16.77328797                                                     | 0.00000143  | up         |
| 36  | A_24_P419132  | CENPI       | 16.68421981                                                     | 0.023995268 | up         |
| 37  | A_24_P56270   | DYRK2       | 11.90198879                                                     | 0.0000284   | up         |
| 38  | A_23_P81121   | EXOSC9      | 11.02087981                                                     | 0.0000339   | up         |
| 39  | A_23_P55518   | SMAD7       | 10.96368213                                                     | 0.001205765 | up         |
| 40  | A_23_P100868  | MYO19       | 10.35098798                                                     | 0.0000311   | up         |
| 41  | A_23_P252306  | ID1         | 10.34219771                                                     | 0.00000083  | up         |
| 42  | A_23_P24903   | P2RY2       | 9.972987781                                                     | 0.000384152 | up         |
| 43  | A_23_P150693  | FJX1        | 9.812987794                                                     | 0.0000144   | up         |
| 44  | A_23_P205789  | GABPB1      | 8.453287901                                                     | 0.0000132   | up         |
| 45  | A_33_P3292829 | SCYL2       | 8.124876912                                                     | 0.000521042 | up         |
| 46  | A_23_P62840   | YRDC        | 6.980986124                                                     | 0.000104682 | up         |
| 47  | A_33_P3319041 | HMGB3       | 6.951098761                                                     | 0.0000161   | up         |

|    |               |            |             |             |    |
|----|---------------|------------|-------------|-------------|----|
| 48 | A_24_P71373   | SLC9A1     | 6.844567814 | 0.006387341 | up |
| 49 | A_33_P3374210 | MKI67      | 6.692176992 | 0.000709776 | up |
| 50 | A_23_P259413  | CDV3       | 5.518987985 | 0.0000349   | up |
| 51 | A_23_P26024   | C15orf48   | 5.508702303 | 0.00000162  | up |
| 52 | A_24_P365975  | COL8A2     | 5.490428188 | 0.000000265 | up |
| 53 | A_23_P206022  | ITGA11     | 5.452399476 | 0.000000112 | up |
| 54 | A_33_P3268783 | AMZ1       | 5.433218248 | 0.00000107  | up |
| 55 | A_23_P163567  | SMPD3      | 5.427664075 | 0.0000206   | up |
| 56 | A_33_P3252286 | CRLF1      | 5.398971122 | 0.00000016  | up |
| 57 | A_32_P98227   | LDB3       | 5.379901156 | 8.24E-08    | up |
| 58 | A_23_P406025  | PRUNE2     | 5.360139446 | 1.39E-08    | up |
| 59 | A_24_P130363  | C18orf1    | 5.358925278 | 0.009319466 | up |
| 60 | A_23_P57277   | C21orf7    | 5.350269882 | 0.000000764 | up |
| 61 | A_33_P3418541 | ACTG2      | 5.340493882 | 0.000000464 | up |
| 62 | A_33_P3215640 | PI16       | 5.334934284 | 0.004311506 | up |
| 63 | A_33_P3373046 | ZNF772     | 5.324709309 | 7.97E-08    | up |
| 64 | A_23_P102681  | MGC4294    | 5.322472904 | 8.49E-08    | up |
| 65 | A_23_P126836  | TNFSF4     | 5.319958162 | 0.00000121  | up |
| 66 | A_33_P3313283 | CILP2      | 5.312280526 | 0.000006    | up |
| 67 | A_33_P3336686 | CLIC3      | 5.307815659 | 0.000000154 | up |
| 68 | A_24_P329487  | FAM84B     | 5.303997149 | 0.000000153 | up |
| 69 | A_23_P151895  | CILP       | 5.298402093 | 0.000000531 | up |
| 70 | A_24_P69095   | ENC1       | 5.296832913 | 2.33E-09    | up |
| 71 | A_24_P227927  | IL21R      | 5.294277197 | 0.00000105  | up |
| 72 | A_24_P6903    | ACTBL2     | 5.277368163 | 0.00000129  | up |
| 73 | A_23_P157914  | MAMDC2     | 5.265108761 | 0.000000102 | up |
| 74 | A_33_P3345534 | KRT14      | 5.245363182 | 0.000808355 | up |
| 75 | A_23_P49499   | ST6GALNAC2 | 5.234530705 | 0.000000908 | up |
| 76 | A_33_P3358208 | PADI1      | 5.209029714 | 8.12E-09    | up |
| 77 | A_24_P935794  | FAM150A    | 5.202675284 | 3.81E-08    | up |
| 78 | A_23_P25030   | HSD17B6    | 5.201161613 | 4.49E-08    | up |
| 79 | A_23_P215634  | IGFBP3     | 5.193705341 | 1.59E-11    | up |
| 80 | A_23_P167367  | PITX2      | 5.193012387 | 1.23E-09    | up |
| 81 | A_23_P53663   | PAWR       | 5.169436405 | 0.000000607 | up |
| 82 | A_24_P787897  | XYLT1      | 5.163866368 | 5.27E-08    | up |
| 83 | A_23_P65240   | COL4A1     | 5.150010951 | 0.00000125  | up |
| 84 | A_23_P203558  | HBB        | 5.138883692 | 0.036476756 | up |
| 85 | A_23_P167159  | SCRG1      | 5.138058086 | 0.00000131  | up |
| 86 | A_24_P331704  | KRT80      | 5.136936832 | 9.83E-08    | up |
| 87 | A_23_P421306  | SYT12      | 5.128238763 | 0.0000304   | up |
| 88 | A_24_P268676  | BHLHE40    | 5.107907267 | 0.00000987  | up |
| 89 | A_23_P139418  | GALNTL4    | 5.106694425 | 0.00000293  | up |
| 90 | A_23_P394395  | JPH2       | 5.102377002 | 0.000000148 | up |
| 91 | A_33_P3357818 | HTR1D      | 5.100527055 | 0.001647136 | up |
| 92 | A_23_P204286  | MGP        | 5.095359129 | 0.00000002  | up |
| 93 | A_23_P151778  | CMA1       | 5.092372073 | 0.0000923   | up |
| 94 | A_23_P128084  | ITGA7      | 5.088040661 | 0.000000524 | up |
| 95 | A_33_P3347291 | INMT       | 5.084021154 | 0.00000272  | up |
| 96 | A_23_P125233  | CNN1       | 5.080700188 | 0.000000541 | up |
| 97 | A_33_P3259339 | COL11A1    | 5.073310055 | 0.000000939 | up |
| 98 | A_23_P127721  | P2RX3      | 5.059888755 | 0.0000549   | up |

|     |               |             |             |             |    |
|-----|---------------|-------------|-------------|-------------|----|
| 99  | A_33_P3249818 | CEACAM18    | 5.04236388  | 0.000821821 | up |
| 100 | A_23_P38732   | CDH2        | 5.034301776 | 0.000000082 | up |
| 101 | A_33_P3277674 | FBXL22      | 5.032630694 | 0.00000398  | up |
| 102 | A_24_P104407  | SYNM        | 5.021187736 | 0.00000194  | up |
| 103 | A_24_P413126  | PMEPA1      | 5.014463195 | 0.000000256 | up |
| 104 | A_33_P3738458 | TNS1        | 5.009687342 | 0.00000305  | up |
| 105 | A_33_P3310929 | ADAM12      | 5.00510615  | 0.00000191  | up |
| 106 | A_32_P51237   | KANK4       | 5.000000249 | 0.000046    | up |
| 107 | A_23_P13740   | NAV3        | 4.985309362 | 0.0000012   | up |
| 108 | A_33_P3402654 | FLJ43390    | 4.936928895 | 5.43E-08    | up |
| 109 | A_24_P22800   | PSG11       | 4.913823369 | 0.00000274  | up |
| 110 | A_24_P158089  | SERPINE1    | 4.899785863 | 0.000337067 | up |
| 111 | A_23_P146946  | CST6        | 4.895764516 | 0.000000118 | up |
| 112 | A_24_P251969  | FGF1        | 4.892406118 | 5.95E-08    | up |
| 113 | A_33_P3335915 | SYNE1       | 4.888774519 | 0.00000915  | up |
| 114 | A_24_P371628  | ANKH        | 4.887656847 | 9.28E-08    | up |
| 115 | A_23_P43107   | TM7SF4      | 4.882532566 | 0.000181024 | up |
| 116 | A_33_P3353791 | ITGA1       | 4.876484147 | 0.00000048  | up |
| 117 | A_23_P122924  | INHBA       | 4.85938296  | 0.00000611  | up |
| 118 | A_23_P106617  | WFDC1       | 4.85773234  | 1.53E-10    | up |
| 119 | A_23_P119095  | PPP1R13L    | 4.856281327 | 0.00000198  | up |
| 120 | A_23_P45424   | ITGB1BP2    | 4.841743549 | 0.0000102   | up |
| 121 | A_33_P3306624 | HCRT        | 4.840571314 | 0.0000312   | up |
| 122 | A_33_P3239347 | NKX3-1      | 4.834552759 | 0.00000106  | up |
| 123 | A_33_P3365735 | THBS2       | 4.834473117 | 0.0000203   | up |
| 124 | A_33_P3342957 | STK17B      | 4.834179243 | 6.62E-08    | up |
| 125 | A_23_P140928  | TMC7        | 4.831147833 | 0.000163208 | up |
| 126 | A_33_P3879161 | PIK3AP1     | 4.82467022  | 0.004597394 | up |
| 127 | A_23_P372834  | AQP1        | 4.82114649  | 6.25E-08    | up |
| 128 | A_33_P3268532 | PCK2        | 4.818059578 | 8.68E-08    | up |
| 129 | A_33_P3399534 | RNU105B     | 4.800677427 | 0.0000923   | up |
| 130 | A_24_P64233   | ALDH1B1     | 4.797807142 | 3.73E-08    | up |
| 131 | A_32_P226205  | ZFHX2       | 4.785340998 | 0.0000084   | up |
| 132 | A_32_P192823  | PRPS1L1     | 4.780013082 | 0.000000218 | up |
| 133 | A_24_P931443  | GPR68       | 4.779350588 | 0.00000034  | up |
| 134 | A_23_P39931   | DYSF        | 4.778619842 | 0.0000229   | up |
| 135 | A_23_P40295   | C20orf103   | 4.771404509 | 0.000000479 | up |
| 136 | A_33_P3235043 | TRIM67      | 4.767581717 | 0.0000513   | up |
| 137 | A_23_P430658  | HEYL        | 4.730644668 | 0.00000095  | up |
| 138 | A_33_P3299934 | LOC10028925 | 4.73054914  | 0.000257715 | up |
| 139 | A_23_P161507  | MTL5        | 4.712770955 | 0.0000423   | up |
| 140 | A_33_P3399980 | TYRP1       | 4.708659826 | 0.0000114   | up |
| 141 | A_24_P253251  | SLC7A1      | 4.702039961 | 1.07E-08    | up |
| 142 | A_32_P62863   | SCHIP1      | 4.692945263 | 7.81E-08    | up |
| 143 | A_23_P205370  | ASB2        | 4.645262207 | 0.000000858 | up |
| 144 | A_23_P56347   | PSG3        | 4.630503583 | 0.001082196 | up |
| 145 | A_33_P3255194 | OSBPL6      | 4.622276619 | 0.0000164   | up |
| 146 | A_24_P226970  | ZNF365      | 4.618489218 | 0.000000913 | up |
| 147 | A_33_P3415052 | NIPAL4      | 4.612691051 | 0.000132427 | up |
| 148 | A_23_P48109   | NINJ2       | 4.601749442 | 0.00000438  | up |
| 149 | A_23_P161352  | PTPLA       | 4.596035686 | 0.000000172 | up |

|     |               |             |             |             |    |
|-----|---------------|-------------|-------------|-------------|----|
| 150 | A_23_P158851  | PCDH10      | 4.592514681 | 0.000000659 | up |
| 151 | A_33_P3332547 | IQCJ-SCHIP1 | 4.589786034 | 1.47E-08    | up |
| 152 | A_23_P26457   | HBA2        | 4.582705787 | 0.048873677 | up |
| 153 | A_24_P914625  | BEND4       | 4.573675994 | 0.000138083 | up |
| 154 | A_24_P117029  | LDLR        | 4.570737606 | 0.0000058   | up |
| 155 | A_33_P3299510 | SCXA        | 4.566682745 | 0.000615309 | up |
| 156 | A_33_P3409159 | SLC22A23    | 4.557413161 | 0.00000791  | up |
| 157 | A_23_P2283    | TAC3        | 4.549595135 | 0.000000195 | up |
| 158 | A_33_P3421913 | CADM1       | 4.547459009 | 0.00000392  | up |
| 159 | A_24_P239606  | GADD45B     | 4.518551398 | 0.00000112  | up |
| 160 | A_24_P54390   | RASGRP3     | 4.515920118 | 0.0000041   | up |
| 161 | A_24_P926960  | MEGF6       | 4.513954887 | 0.00000339  | up |
| 162 | A_33_P3211238 | VWCE        | 4.51045612  | 0.00000295  | up |
| 163 | A_33_P3376971 | CHAC1       | 4.507500755 | 6.73E-08    | up |
| 164 | A_33_P3323564 | LOC646324   | 4.498114857 | 0.00000177  | up |
| 165 | A_23_P138194  | NCF2        | 4.472030931 | 0.000013    | up |
| 166 | A_33_P3406899 | TRAK1       | 4.466418283 | 0.00000126  | up |
| 167 | A_23_P57784   | CLDN1       | 4.46442147  | 0.00000105  | up |
| 168 | A_23_P427136  | TSSK1B      | 4.455746327 | 0.0000715   | up |
| 169 | A_23_P209347  | ANKRD44     | 4.447008411 | 0.000000486 | up |
| 170 | A_23_P432013  | ZPLD1       | 4.442622836 | 0.00000235  | up |
| 171 | A_23_P36888   | FAM113B     | 4.441013633 | 0.00000336  | up |
| 172 | A_33_P3392525 | ARL4D       | 4.430231331 | 0.000000843 | up |
| 173 | A_23_P374082  | ADAM19      | 4.420981917 | 8.55E-08    | up |
| 174 | A_33_P3269166 | NALCN       | 4.42008598  | 0.00000575  | up |
| 175 | A_23_P105251  | GLI1        | 4.416602519 | 1.68E-08    | up |
| 176 | A_24_P88850   | MRAS        | 4.409411133 | 1.08E-08    | up |
| 177 | A_24_P389916  | LRRC32      | 4.408572239 | 0.00000826  | up |
| 178 | A_33_P3229156 | SLC17A9     | 4.407512517 | 0.00000162  | up |
| 179 | A_33_P3401647 | PPP1R14A    | 4.390044306 | 0.0000848   | up |
| 180 | A_24_P246293  | FDXACB1     | 4.383258206 | 0.000000924 | up |
| 181 | A_23_P103703  | HSPB7       | 4.383017077 | 0.000118617 | up |
| 182 | A_33_P3318272 | OR5M11      | 4.381269924 | 0.019839364 | up |
| 183 | A_33_P3246418 | MDFI        | 4.375304222 | 0.000000233 | up |
| 184 | A_23_P131676  | CXCR7       | 4.374691451 | 0.000000854 | up |
| 185 | A_33_P3243093 | RGS5        | 4.371270126 | 0.0000022   | up |
| 186 | A_23_P62999   | EXTL1       | 4.368147784 | 0.0000179   | up |
| 187 | A_23_P168610  | TSPAN13     | 4.36318708  | 0.000000306 | up |
| 188 | A_24_P275073  | ADAMTS14    | 4.361639703 | 0.00000425  | up |
| 189 | A_23_P94552   | TMEM2       | 4.357191938 | 0.0000056   | up |
| 190 | A_32_P105549  | ANXA8L2     | 4.307788442 | 0.000168238 | up |
| 191 | A_23_P155979  | EGF         | 4.301526225 | 0.00000819  | up |
| 192 | A_23_P12554   | PKD2L1      | 4.297266152 | 0.001498593 | up |
| 193 | A_33_P3225512 | OAS2        | 4.296071785 | 0.00044649  | up |
| 194 | A_33_P3441639 | LOC145694   | 4.28354467  | 0.00000127  | up |
| 195 | A_23_P304524  | DCLK2       | 4.282441286 | 0.00000252  | up |
| 196 | A_33_P3331746 | ST6GAL2     | 4.279374682 | 0.000144159 | up |
| 197 | A_33_P3272231 | MFSD2A      | 4.270021498 | 0.000000888 | up |
| 198 | A_23_P107744  | S1PR5       | 4.266520559 | 0.000000144 | up |
| 199 | A_33_P3395581 | TRIM53P     | 4.263157039 | 0.016502484 | up |
| 200 | A_23_P150053  | ACTA2       | 4.259795679 | 5.65E-09    | up |

|     |               |             |             |             |    |
|-----|---------------|-------------|-------------|-------------|----|
| 201 | A_33_P3254380 | SLC9A7P1    | 4.249931731 | 0.00000347  | up |
| 202 | A_23_P113777  | ITGB1       | 4.24680196  | 0.00000029  | up |
| 203 | A_23_P66881   | RGS9        | 4.243905897 | 0.00000132  | up |
| 204 | A_33_P3851023 | NRXN3       | 4.228610464 | 0.000018    | up |
| 205 | A_23_P78750   | SLC17A7     | 4.218522121 | 0.000199891 | up |
| 206 | A_33_P3398143 | ITGB2       | 4.190933414 | 0.0000125   | up |
| 207 | A_32_P14610   | PDLIM5      | 4.188876935 | 0.000000046 | up |
| 208 | A_23_P59738   | MYL7        | 4.171986048 | 0.000000581 | up |
| 209 | A_24_P34155   | RUNX1       | 4.166022891 | 0.00000572  | up |
| 210 | A_23_P333228  | 4-Mar       | 4.162034719 | 1.91E-08    | up |
| 211 | A_24_P335620  | SLC7A5      | 4.156657852 | 0.0000104   | up |
| 212 | A_24_P191312  | SLC1A4      | 4.153030307 | 0.00000279  | up |
| 213 | A_23_P126103  | CTH         | 4.145139534 | 0.0000074   | up |
| 214 | A_23_P350005  | TRIML2      | 4.143734015 | 0.000100539 | up |
| 215 | A_23_P29773   | LAMP3       | 4.138037349 | 0.007954962 | up |
| 216 | A_23_P122216  | LOX         | 4.13641136  | 5.67E-08    | up |
| 217 | A_23_P374844  | GAL         | 4.135553218 | 0.000031    | up |
| 218 | A_23_P127584  | NNMT        | 4.12529417  | 0.000000272 | up |
| 219 | A_23_P426305  | AOC3        | 4.113509475 | 0.000000208 | up |
| 220 | A_33_P3703501 | GALNT10     | 4.111762115 | 0.00000788  | up |
| 221 | A_33_P3312509 | ADAMTSL2    | 4.107837181 | 0.00000996  | up |
| 222 | A_24_P71468   | QPCT        | 4.095226745 | 0.00000171  | up |
| 223 | A_23_P64567   | PPME1       | 4.093691353 | 0.0000291   | up |
| 224 | A_33_P3417650 | KLK10       | 4.093224417 | 0.00938347  | up |
| 225 | A_33_P3411260 | LOC10028888 | 4.091669828 | 0.002355253 | up |
| 226 | A_33_P3268181 | LIMS2       | 4.087479703 | 0.008257101 | up |
| 227 | A_23_P41629   | ADAMTS16    | 4.087070134 | 0.000831393 | up |
| 228 | A_23_P87013   | TAGLN       | 4.08332387  | 0.00000878  | up |
| 229 | A_23_P210690  | TRIB3       | 4.072810434 | 0.00000511  | up |
| 230 | A_24_P413470  | TP73        | 4.067366516 | 0.005526173 | up |
| 231 | A_33_P3278590 | AKAP14      | 4.065949603 | 0.002848303 | up |
| 232 | A_33_P3335966 | TPM1        | 4.037987188 | 3.77E-09    | up |
| 233 | A_23_P256470  | NPY         | 4.031413219 | 0.037472966 | up |
| 234 | A_33_P3258279 | NTM         | 4.031219947 | 2.72E-08    | up |
| 235 | A_33_P3387861 | CENPN       | 4.029501397 | 0.000000943 | up |
| 236 | A_23_P95764   | PRPS1       | 4.022977679 | 0.00000416  | up |
| 237 | A_32_P101031  | LYPD1       | 4.022348825 | 0.000000375 | up |
| 238 | A_23_P7727    | HAPLN1      | 4.014411197 | 0.0000181   | up |
| 239 | A_23_P22350   | GRAMD3      | 4.014312695 | 0.000000645 | up |
| 240 | A_23_P141802  | SERPINB7    | 3.993632279 | 0.0000229   | up |
| 241 | A_23_P58390   | C4orf32     | 3.991317372 | 0.000000461 | up |
| 242 | A_23_P11843   | LRRN2       | 3.990478636 | 0.0000125   | up |
| 243 | A_33_P3235880 | TBC1D28     | 3.981568192 | 0.011212092 | up |
| 244 | A_33_P3377786 | LOC649887   | 3.969411048 | 0.00000741  | up |
| 245 | A_23_P162171  | MCAM        | 3.963222598 | 0.0000507   | up |
| 246 | A_23_P139500  | BHLHE41     | 3.955810089 | 0.000000019 | up |
| 247 | A_23_P42397   | PRSS35      | 3.945652497 | 1.26E-08    | up |
| 248 | A_24_P96961   | SPSB1       | 3.942255733 | 0.00000257  | up |
| 249 | A_23_P206733  | CES1        | 3.935963749 | 0.0000435   | up |
| 250 | A_33_P3436732 | DSCR10      | 3.926117001 | 0.0000121   | up |
| 251 | A_33_P3313145 | ITIH3       | 3.91060124  | 1.01E-09    | up |

|     |               |             |             |             |    |
|-----|---------------|-------------|-------------|-------------|----|
| 252 | A_23_P431933  | CAMKK1      | 3.89505311  | 0.000000673 | up |
| 253 | A_23_P379020  | GNRHR2      | 3.889519213 | 0.004551633 | up |
| 254 | A_23_P214300  | GSTA2       | 3.878553584 | 0.001739253 | up |
| 255 | A_33_P3270311 | HECW2       | 3.878327764 | 0.000391994 | up |
| 256 | A_23_P352799  | NPW         | 3.877318726 | 0.000521803 | up |
| 257 | A_23_P110430  | MSX1        | 3.877191517 | 4.02E-08    | up |
| 258 | A_23_P120794  | SLC7A4      | 3.876380704 | 0.00000165  | up |
| 259 | A_24_P186943  | ELN         | 3.86906223  | 0.013314967 | up |
| 260 | A_23_P211445  | LIMK2       | 3.863648011 | 0.000000773 | up |
| 261 | A_23_P110184  | SC4MOL      | 3.856483219 | 0.00003     | up |
| 262 | A_23_P169909  | DGKI        | 3.85543764  | 0.00001     | up |
| 263 | A_32_P190303  | LONRF2      | 3.854837825 | 0.0000102   | up |
| 264 | A_33_P3374365 | LOC10012970 | 3.852462375 | 0.000110185 | up |
| 265 | A_33_P3381666 | ABLIM2      | 3.852364375 | 0.002255999 | up |
| 266 | A_23_P369485  | MGC45800    | 3.849916796 | 0.000174262 | up |
| 267 | A_24_P151032  | MYL4        | 3.845984904 | 0.00028083  | up |
| 268 | A_33_P3262094 | OR8G5       | 3.843482235 | 0.000995775 | up |
| 269 | A_23_P112220  | INSL4       | 3.835110997 | 0.00002     | up |
| 270 | A_24_P74896   | GPR144      | 3.831476437 | 0.0000257   | up |
| 271 | A_24_P347378  | ALOX5AP     | 3.823427011 | 0.00000686  | up |
| 272 | A_23_P4899    | NTF4        | 3.82304867  | 0.000000313 | up |
| 273 | A_33_P3421821 | PLA2G6      | 3.781703706 | 0.028709258 | up |
| 274 | A_33_P3318796 | FSTL3       | 3.780195985 | 0.000168912 | up |
| 275 | A_33_P3285565 | CLDN3       | 3.77598404  | 0.0000201   | up |
| 276 | A_23_P67151   | OLFM2       | 3.775381844 | 0.000415063 | up |
| 277 | A_33_P3363188 | FLJ43315    | 3.772467138 | 0.0000027   | up |
| 278 | A_24_P500422  | LOC730101   | 3.762611496 | 0.00000309  | up |
| 279 | A_23_P25566   | GPR183      | 3.761100873 | 0.0000285   | up |
| 280 | A_24_P74932   | PLP2        | 3.75985146  | 0.000000687 | up |
| 281 | A_23_P91850   | IL20RB      | 3.748680578 | 0.0000136   | up |
| 282 | A_23_P68740   | AIRE        | 3.746729957 | 0.000442258 | up |
| 283 | A_33_P3338494 | RTCD1       | 3.746377123 | 0.000155035 | up |
| 284 | A_33_P3343316 | SH3BGRL2    | 3.74239974  | 0.00000111  | up |
| 285 | A_33_P3413905 | ADM2        | 3.73879983  | 0.00000268  | up |
| 286 | A_23_P151075  | ARHGDIB     | 3.734474292 | 0.00000305  | up |
| 287 | A_33_P3418125 | GLIPR1      | 3.726557964 | 0.00000222  | up |
| 288 | A_23_P124642  | RASGRP1     | 3.706155635 | 0.00000436  | up |
| 289 | A_33_P3219090 | INSIG1      | 3.705877432 | 0.0000057   | up |
| 290 | A_33_P3269403 | FOXI1       | 3.704663912 | 0.047222343 | up |
| 291 | A_33_P3286953 | ADAMTS6     | 3.702862214 | 0.0000194   | up |
| 292 | A_23_P152838  | CCL5        | 3.686177476 | 0.040324379 | up |
| 293 | A_23_P8497    | GHRHR       | 3.685283228 | 0.038980059 | up |
| 294 | A_33_P3318581 | PLOD2       | 3.684349697 | 0.0000157   | up |
| 295 | A_23_P376088  | LIME1       | 3.683183647 | 0.000161159 | up |
| 296 | A_33_P3254590 | HNRNPKP3    | 3.679377408 | 0.041408905 | up |
| 297 | A_33_P3260634 | PLCB4       | 3.67743328  | 0.000000391 | up |
| 298 | A_23_P140760  | GPR97       | 3.669853147 | 0.0000288   | up |
| 299 | A_23_P151970  | FEM1B       | 3.668391631 | 0.000000989 | up |
| 300 | A_23_P96158   | KRT17       | 3.654541289 | 0.000329855 | up |
| 301 | A_33_P3243887 | IL11        | 3.65324523  | 0.0000207   | up |
| 302 | A_33_P3229477 | MPP7        | 3.648508547 | 0.000650703 | up |

|     |               |              |             |             |    |
|-----|---------------|--------------|-------------|-------------|----|
| 303 | A_23_P69030   | COL8A1       | 3.639368743 | 0.0000252   | up |
| 304 | A_23_P75430   | C11orf75     | 3.636134755 | 0.00000583  | up |
| 305 | A_23_P120316  | MTHFD2       | 3.622104911 | 8.59E-08    | up |
| 306 | A_32_P207169  | C1orf133     | 3.618215909 | 0.00000492  | up |
| 307 | A_23_P92730   | HSPB3        | 3.615086915 | 0.000155739 | up |
| 308 | A_23_P166616  | AGTR1        | 3.605134039 | 0.0000177   | up |
| 309 | A_23_P50919   | SERPINE2     | 3.602874336 | 0.00000297  | up |
| 310 | A_33_P3606685 | LOC283403    | 3.598654337 | 0.001398583 | up |
| 311 | A_23_P379475  | DHCR24       | 3.593607889 | 0.0000018   | up |
| 312 | A_33_P3227934 | LOC100130431 | 3.580168692 | 0.031895882 | up |
| 313 | A_32_P157945  | DSP          | 3.571420482 | 2.18E-08    | up |
| 314 | A_33_P3227400 | COL4A4       | 3.567697262 | 0.000732604 | up |
| 315 | A_24_P178300  | PRR21        | 3.560828616 | 0.0000639   | up |
| 316 | A_33_P3372257 | HOMER1       | 3.559831694 | 7.15E-08    | up |
| 317 | A_23_P160159  | SLC2A5       | 3.555840634 | 0.00000479  | up |
| 318 | A_23_P135061  | CORO2A       | 3.553912102 | 0.0000144   | up |
| 319 | A_24_P357169  | EPPK1        | 3.547518399 | 0.000634139 | up |
| 320 | A_33_P3300332 | LOC100506221 | 3.545739711 | 0.000290436 | up |
| 321 | A_23_P250212  | SGK223       | 3.545154904 | 0.00000132  | up |
| 322 | A_23_P131074  | THEG         | 3.544736366 | 0.00000632  | up |
| 323 | A_23_P153676  | TLE2         | 3.538033643 | 6.89E-08    | up |
| 324 | A_33_P3413741 | OXTR         | 3.532357431 | 0.0000365   | up |
| 325 | A_23_P99515   | C13orf33     | 3.526816057 | 0.000000821 | up |
| 326 | A_23_P113701  | PDGFA        | 3.52561474  | 0.00000248  | up |
| 327 | A_33_P3708413 | MFAP5        | 3.525236383 | 0.00000349  | up |
| 328 | A_23_P401472  | CHRM3        | 3.524202931 | 0.0000148   | up |
| 329 | A_33_P3271276 | PSG5         | 3.523024074 | 0.00000548  | up |
| 330 | A_23_P371824  | TUFT1        | 3.520267025 | 0.00000411  | up |
| 331 | A_23_P389102  | MYO1D        | 3.519227386 | 3.32E-08    | up |
| 332 | A_32_P163858  | SCD          | 3.518992242 | 0.0000649   | up |
| 333 | A_23_P160466  | SLC19A2      | 3.518023939 | 0.00000204  | up |
| 334 | A_24_P5750    | KLK2         | 3.51670666  | 0.0000111   | up |
| 335 | A_23_P165201  | PRODH2       | 3.508828657 | 0.043673482 | up |
| 336 | A_23_P209978  | VSNL1        | 3.50420538  | 0.000427563 | up |
| 337 | A_33_P3246448 | KCNE4        | 3.489851464 | 0.0000175   | up |
| 338 | A_23_P401606  | EDIL3        | 3.489815744 | 0.0000415   | up |
| 339 | A_23_P153022  | KRTAP2-4     | 3.486075141 | 0.0000256   | up |
| 340 | A_23_P81717   | FRMD1        | 3.480946562 | 0.020879845 | up |
| 341 | A_33_P3335147 | MURC         | 3.473565575 | 0.0000187   | up |
| 342 | A_32_P4626    | LOC100505881 | 3.468854031 | 0.00000166  | up |
| 343 | A_23_P147245  | OSBPL10      | 3.466983971 | 0.00000702  | up |
| 344 | A_24_P93855   | FOXP4        | 3.463799525 | 0.000423907 | up |
| 345 | A_32_P103291  | SMYD3        | 3.454014964 | 0.00000285  | up |
| 346 | A_24_P348989  | LILRA1       | 3.451614396 | 0.0000162   | up |
| 347 | A_23_P136355  | HHAT         | 3.449000489 | 0.0000081   | up |
| 348 | A_23_P433798  | PODNL1       | 3.448374271 | 0.000155528 | up |
| 349 | A_23_P115190  | NGF          | 3.447711365 | 0.000000113 | up |
| 350 | A_24_P334130  | FN1          | 3.447576903 | 0.0000501   | up |
| 351 | A_32_P108655  | AK4          | 3.435991816 | 0.0000789   | up |
| 352 | A_33_P3408305 | CERS3        | 3.433542925 | 0.0000403   | up |
| 353 | A_24_P59220   | POTEF        | 3.431039258 | 0.0000963   | up |



|     |               |           |             |             |    |
|-----|---------------|-----------|-------------|-------------|----|
| 354 | A_23_P121665  | SORCS2    | 3.424835829 | 0.0000278   | up |
| 355 | A_23_P114008  | TM4SF20   | 3.421372851 | 0.0000352   | up |
| 356 | A_23_P210581  | KCNG1     | 3.417561579 | 0.00000368  | up |
| 357 | A_23_P128008  | CCDC81    | 3.413846838 | 0.0000748   | up |
| 358 | A_33_P3378835 | SLC9A3R1  | 3.408684091 | 0.000000737 | up |
| 359 | A_23_P27795   | SPINT2    | 3.407576392 | 0.000000016 | up |
| 360 | A_23_P303155  | TMEM87B   | 3.392699376 | 0.00000566  | up |
| 361 | A_23_P254507  | HOPX      | 3.392193968 | 0.0000002   | up |
| 362 | A_33_P3349646 | PCDH7     | 3.38552702  | 0.00000328  | up |
| 363 | A_23_P204375  | LPAR5     | 3.384574954 | 0.000041    | up |
| 364 | A_23_P162589  | VDR       | 3.384192967 | 0.00000358  | up |
| 365 | A_23_P115444  | TNFSF18   | 3.382475927 | 0.0000501   | up |
| 366 | A_23_P207632  | ATP2A3    | 3.381699188 | 0.000369919 | up |
| 367 | A_33_P3391275 | LOC284749 | 3.377290627 | 0.004280913 | up |
| 368 | A_23_P318904  | SERTAD4   | 3.37611879  | 3.48E-08    | up |
| 369 | A_33_P3812815 | PKD1      | 3.371410735 | 0.000165912 | up |
| 370 | A_33_P3256272 | KRTAP10-5 | 3.371178457 | 0.005677133 | up |
| 371 | A_23_P31984   | ACTL7A    | 3.368366216 | 0.0000426   | up |
| 372 | A_23_P426021  | SEL1L3    | 3.368263332 | 0.0000105   | up |
| 373 | A_23_P201386  | DDAH1     | 3.36784638  | 0.00000181  | up |
| 374 | A_33_P3418576 | SERAC1    | 3.363266655 | 0.0000012   | up |
| 375 | A_33_P3289596 | EFR3B     | 3.363197029 | 0.000000373 | up |
| 376 | A_23_P27734   | NPAS1     | 3.361568465 | 0.000776569 | up |
| 377 | A_24_P354689  | SPOCK1    | 3.358379348 | 0.000000262 | up |
| 378 | A_23_P44724   | CSRP2     | 3.357672066 | 0.0000002   | up |
| 379 | A_23_P145694  | ASNS      | 3.357219037 | 8.08E-09    | up |
| 380 | A_23_P128728  | ARG2      | 3.354261888 | 0.0000031   | up |
| 381 | A_24_P395814  | CGB       | 3.35245926  | 0.00000365  | up |
| 382 | A_23_P214821  | EDN1      | 3.352091895 | 0.00000235  | up |
| 383 | A_24_P366526  | SYNGR2    | 3.350598454 | 0.00000167  | up |
| 384 | A_23_P205428  | FOXG1     | 3.348196655 | 0.039763887 | up |
| 385 | A_23_P47704   | UCP2      | 3.34749059  | 0.00010504  | up |
| 386 | A_23_P214144  | COL10A1   | 3.344978644 | 0.005325068 | up |
| 387 | A_23_P2431    | C3AR1     | 3.343595212 | 0.000149637 | up |
| 388 | A_33_P3277110 | SLC5A3    | 3.341452811 | 0.000000119 | up |
| 389 | A_23_P35456   | SH3PXD2A  | 3.339316488 | 8.5E-09     | up |
| 390 | A_23_P52336   | UNC5B     | 3.338738265 | 0.0000339   | up |
| 391 | A_33_P3311770 | ZNF789    | 3.33728871  | 0.00000168  | up |
| 392 | A_23_P143559  | CLTCL1    | 3.336248535 | 0.0000118   | up |
| 393 | A_33_P3218960 | CACNA1H   | 3.330970322 | 0.000000492 | up |
| 394 | A_24_P234415  | STAC      | 3.324548367 | 0.000113351 | up |
| 395 | A_33_P3402635 | C16orf3   | 3.322969382 | 0.000091    | up |
| 396 | A_33_P3250745 | DCAF8L1   | 3.318894262 | 0.000124998 | up |
| 397 | A_24_P298027  | AXIN2     | 3.315902377 | 0.033985412 | up |
| 398 | A_33_P3369844 | CD24      | 3.315695603 | 0.000164371 | up |
| 399 | A_23_P165624  | TNFAIP6   | 3.310711888 | 0.000000353 | up |
| 400 | A_23_P344884  | CARNS1    | 3.307594785 | 0.0000115   | up |
| 401 | A_32_P61684   | PAG1      | 3.307346806 | 9.25E-08    | up |
| 402 | A_33_P3221960 | IL18RAP   | 3.299268062 | 0.0000139   | up |
| 403 | A_23_P36624   | TAS2R7    | 3.298447175 | 0.000102479 | up |
| 404 | A_33_P3225507 | OR10G2    | 3.296448022 | 0.000930533 | up |

|     |               |             |             |             |    |
|-----|---------------|-------------|-------------|-------------|----|
| 405 | A_23_P59950   | SLC39A14    | 3.295186757 | 0.000000814 | up |
| 406 | A_33_P3331916 | LOC10050708 | 3.294118985 | 0.0000518   | up |
| 407 | A_33_P3369098 | MYL10       | 3.29279516  | 7.47E-08    | up |
| 408 | A_24_P349274  | OR4X2       | 3.291990639 | 0.042384902 | up |
| 409 | A_23_P157865  | TNC         | 3.289230397 | 0.00000158  | up |
| 410 | A_33_P3235761 | LOC284023   | 3.284813587 | 0.001617374 | up |
| 411 | A_33_P3409477 | UBASH3B     | 3.283060873 | 0.0000308   | up |
| 412 | A_33_P3318530 | LOC441204   | 3.282358457 | 0.011167721 | up |
| 413 | A_33_P3308456 | HOXB13-AS1  | 3.280446441 | 0.000000657 | up |
| 414 | A_23_P85922   | BMP8A       | 3.279589697 | 0.001836755 | up |
| 415 | A_33_P3382565 | KIF26B      | 3.279560145 | 0.00000601  | up |
| 416 | A_24_P299318  | FAM101B     | 3.275618482 | 1.97E-08    | up |
| 417 | A_23_P55586   | CDH20       | 3.275131802 | 0.003515318 | up |
| 418 | A_23_P94795   | TEAD4       | 3.273083331 | 0.000344154 | up |
| 419 | A_24_P348806  | PLEKHA7     | 3.27226964  | 0.0000131   | up |
| 420 | A_33_P3282634 | ALDH1L2     | 3.27212002  | 0.0000449   | up |
| 421 | A_23_P107173  | MEOX1       | 3.272045931 | 0.000152521 | up |
| 422 | A_23_P131348  | THUMPD2     | 3.27136711  | 0.00000203  | up |
| 423 | A_33_P3331426 | FLJ37786    | 3.262964595 | 0.0000326   | up |
| 424 | A_23_P116942  | LAG3        | 3.260991845 | 0.0000117   | up |
| 425 | A_23_P131050  | ACSBG2      | 3.259541025 | 0.000527067 | up |
| 426 | A_24_P318967  | PDXK        | 3.253246936 | 0.000000558 | up |
| 427 | A_23_P256473  | SEMA3C      | 3.252211764 | 0.0000025   | up |
| 428 | A_33_P3728698 | FLJ45248    | 3.250550347 | 0.0000447   | up |
| 429 | A_23_P73012   | C9orf3      | 3.242526204 | 0.00000833  | up |
| 430 | A_23_P384635  | DZIP1L      | 3.242172234 | 0.00000109  | up |
| 431 | A_23_P49674   | ARHGEF15    | 3.239270618 | 0.000531038 | up |
| 432 | A_33_P3709173 | PHTF2       | 3.238914908 | 0.000333798 | up |
| 433 | A_33_P3398331 | MMP24       | 3.237839262 | 0.000000513 | up |
| 434 | A_33_P3278220 | RABEPK      | 3.234099354 | 0.000255561 | up |
| 435 | A_33_P3260964 | LOC731779   | 3.233866972 | 0.000000791 | up |
| 436 | A_23_P90722   | PTPRN       | 3.233005586 | 0.004246937 | up |
| 437 | A_33_P3237729 | PDLIM4      | 3.227361087 | 0.00000629  | up |
| 438 | A_23_P24444   | DHCR7       | 3.225276992 | 0.0000076   | up |
| 439 | A_33_P3404749 | FMN1        | 3.223812118 | 0.00243644  | up |
| 440 | A_33_P3386414 | DCAF4L2     | 3.223724225 | 0.000101686 | up |
| 441 | A_33_P3255509 | FCHO1       | 3.22276308  | 0.000265359 | up |
| 442 | A_24_P126139  | RAB9B       | 3.220172559 | 0.000028    | up |
| 443 | A_33_P3340615 | PON1        | 3.219884637 | 0.0000323   | up |
| 444 | A_23_P215419  | ICA1        | 3.219147094 | 0.000267965 | up |
| 445 | A_24_P298723  | TTY20       | 3.218823565 | 0.000152561 | up |
| 446 | A_24_P827037  | LRRC15      | 3.215230868 | 0.00000419  | up |
| 447 | A_23_P320897  | DENND1B     | 3.213813773 | 0.00000059  | up |
| 448 | A_33_P3274935 | C17orf28    | 3.207565368 | 7.96E-08    | up |
| 449 | A_33_P3373364 | CLIC4       | 3.202283124 | 0.0000222   | up |
| 450 | A_24_P99046   | STK38L      | 3.200866928 | 0.00000286  | up |
| 451 | A_33_P3296772 | C14orf82    | 3.198056292 | 0.00000545  | up |
| 452 | A_33_P3407299 | ANP32E      | 3.192953037 | 0.00000697  | up |
| 453 | A_33_P3462960 | DNAJC3      | 3.19217704  | 0.00000635  | up |
| 454 | A_32_P156851  | RCAN2       | 3.189881137 | 0.00000214  | up |
| 455 | A_23_P259692  | PSAT1       | 3.18957013  | 0.000000232 | up |

|     |               |              |             |             |    |
|-----|---------------|--------------|-------------|-------------|----|
| 456 | A_24_P104512  | EVPL         | 3.18869181  | 0.000193707 | up |
| 457 | A_24_P142495  | KRTAP1-3     | 3.18854778  | 0.00000164  | up |
| 458 | A_23_P500433  | CARD9        | 3.188280734 | 1.04E-08    | up |
| 459 | A_33_P3218980 | ENTPD1       | 3.184292506 | 0.000124258 | up |
| 460 | A_23_P46429   | CYR61        | 3.184235414 | 0.00000018  | up |
| 461 | A_24_P237583  | WFDC8        | 3.179893541 | 0.009603609 | up |
| 462 | A_33_P3401008 | TMEM150B     | 3.175320022 | 0.0000134   | up |
| 463 | A_23_P406385  | FBXL16       | 3.175107122 | 0.000012    | up |
| 464 | A_23_P19291   | TUBB2A       | 3.163226071 | 0.00000186  | up |
| 465 | A_24_P340941  | LOC100306974 | 3.157773952 | 0.005724057 | up |
| 466 | A_33_P3460043 | C8orf56      | 3.157425732 | 0.0000273   | up |
| 467 | A_33_P3230990 | SCUBE1       | 3.157174423 | 0.000000328 | up |
| 468 | A_33_P3739260 | CAP2         | 3.155211759 | 0.0000605   | up |
| 469 | A_24_P95822   | NPTN         | 3.15291476  | 0.0000669   | up |
| 470 | A_23_P62890   | GBP1         | 3.151127945 | 0.000000135 | up |
| 471 | A_23_P122174  | XRCC4        | 3.150874516 | 0.000000409 | up |
| 472 | A_33_P3333627 | PHACTR1      | 3.143452217 | 0.0000224   | up |
| 473 | A_23_P116512  | PRR5L        | 3.140185966 | 0.000000788 | up |
| 474 | A_23_P107116  | RNF112       | 3.136083922 | 0.000000695 | up |
| 475 | A_23_P100074  | AVEN         | 3.133203916 | 0.00000153  | up |
| 476 | A_24_P306304  | PRAMEF16     | 3.128337863 | 0.03013309  | up |
| 477 | A_33_P3270863 | XDH          | 3.121955557 | 0.000954071 | up |
| 478 | A_33_P3705884 | LOC148189    | 3.120836046 | 0.000000295 | up |
| 479 | A_23_P258381  | SPSB4        | 3.120834099 | 0.0000303   | up |
| 480 | A_33_P3332081 | KHDRBS3      | 3.120798406 | 0.000000403 | up |
| 481 | A_33_P3298024 | ABCC3        | 3.119040819 | 0.00000136  | up |
| 482 | A_23_P327519  | STARD4       | 3.116915405 | 0.0000162   | up |
| 483 | A_23_P354027  | KCTD11       | 3.1144281   | 0.000137896 | up |
| 484 | A_32_P225355  | CPEB2        | 3.11111883  | 0.00000921  | up |
| 485 | A_33_P3302428 | TNRC6C       | 3.111046374 | 0.0000507   | up |
| 486 | A_23_P25994   | LGMN         | 3.104722157 | 0.0000266   | up |
| 487 | A_33_P3218178 | MCART6       | 3.102856979 | 0.000026    | up |
| 488 | A_33_P3367293 | MT1IP        | 3.102355468 | 0.019893049 | up |
| 489 | A_24_P52921   | BCAT1        | 3.100955881 | 0.000000335 | up |
| 490 | A_23_P429998  | FOSB         | 3.1005069   | 0.00000326  | up |
| 491 | A_23_P26522   | AQP8         | 3.09942709  | 0.0000237   | up |
| 492 | A_23_P408376  | HSPA12A      | 3.098188665 | 0.000000488 | up |
| 493 | A_33_P3608210 | LOC554202    | 3.096809561 | 1.98E-08    | up |
| 494 | A_23_P301053  | PAIP2B       | 3.096230405 | 0.000220198 | up |
| 495 | A_32_P471485  | RTKN2        | 3.092723806 | 0.002016628 | up |
| 496 | A_23_P255876  | DNAI1        | 3.088247189 | 0.005902692 | up |
| 497 | A_33_P3217559 | DLK1         | 3.087924188 | 4.69E-09    | up |
| 498 | A_23_P1819    | OR8B8        | 3.087260668 | 2.22E-08    | up |
| 499 | A_23_P487     | UCK2         | 3.086422502 | 0.0000156   | up |
| 500 | A_33_P3362008 | NPPB         | 3.084598964 | 0.0000253   | up |
| 501 | A_33_P3370714 | PGC          | 3.083078094 | 0.004201376 | up |
| 502 | A_23_P107963  | FUT1         | 3.080105997 | 0.000000123 | up |
| 503 | A_33_P3279629 | UCN2         | 3.078838586 | 0.00000353  | up |
| 504 | A_23_P112187  | FIBCD1       | 3.077150274 | 0.000969737 | up |
| 505 | A_23_P121011  | CSRNP1       | 3.076803339 | 0.000317126 | up |
| 506 | A_33_P3233947 | FAM36A       | 3.072154063 | 0.0000017   | up |

|     |               |              |             |             |    |
|-----|---------------|--------------|-------------|-------------|----|
| 507 | A_23_P399001  | CXXC5        | 3.070741353 | 0.0000748   | up |
| 508 | A_23_P21976   | CSPG4        | 3.070537736 | 0.0000679   | up |
| 509 | A_23_P331700  | SRRM3        | 3.064933559 | 0.000271704 | up |
| 510 | A_23_P383227  | S100A1       | 3.064495671 | 0.000292429 | up |
| 511 | A_33_P3818959 | SAMD11       | 3.061159958 | 0.00000913  | up |
| 512 | A_33_P3267814 | MICAL3       | 3.060584358 | 0.0000079   | up |
| 513 | A_23_P69738   | RASL11B      | 3.058862661 | 0.00000286  | up |
| 514 | A_32_P473302  | FLJ35024     | 3.058586336 | 0.00000323  | up |
| 515 | A_33_P3254811 | C3orf70      | 3.054345432 | 0.0000116   | up |
| 516 | A_23_P164912  | LIN7B        | 3.052537249 | 0.00000226  | up |
| 517 | A_33_P3394380 | AKAP5        | 3.050743599 | 0.000512062 | up |
| 518 | A_33_P3233700 | LOC100128671 | 3.046584312 | 0.0000247   | up |
| 519 | A_32_P88231   | LOC100505691 | 3.044666409 | 0.0000514   | up |
| 520 | A_24_P167642  | GCH1         | 3.043093792 | 0.0000772   | up |
| 521 | A_23_P303891  | LCE1C        | 3.040259213 | 0.000341482 | up |
| 522 | A_23_P110403  | PDLIM3       | 3.038043092 | 0.00000246  | up |
| 523 | A_33_P3350758 | RASAL2       | 3.035837915 | 0.0000769   | up |
| 524 | A_23_P19650   | VIP          | 3.035474177 | 0.0000082   | up |
| 525 | A_23_P24129   | DKK1         | 3.033800041 | 5.98E-08    | up |
| 526 | A_23_P388379  | ATRNL1       | 3.032902599 | 0.004282539 | up |
| 527 | A_24_P213643  | TSPAN10      | 3.024184168 | 0.02127846  | up |
| 528 | A_23_P146134  | DUSP26       | 3.022751262 | 0.0000011   | up |
| 529 | A_23_P416666  | GJA10        | 3.018343849 | 0.000965769 | up |
| 530 | A_23_P314101  | SUSD2        | 3.016387271 | 0.0000535   | up |
| 531 | A_33_P3369158 | KIF3C        | 3.00780909  | 0.00000621  | up |
| 532 | A_33_P3230264 | GPC3         | 3.001309293 | 0.016143343 | up |
| 533 | A_33_P3222139 | SREBF1       | 3.000254741 | 0.000215158 | up |
| 534 | A_24_P185854  | DMD          | 2.997959028 | 2.79E-08    | up |
| 535 | A_24_P131222  | ATP13A2      | 2.996813285 | 0.00032862  | up |
| 536 | A_23_P7313    | SPP1         | 2.995717675 | 0.00000022  | up |
| 537 | A_33_P3336700 | SHROOM3      | 2.995073346 | 0.0000097   | up |
| 538 | A_33_P3307960 | AADA3L3      | 2.992209868 | 0.0000165   | up |
| 539 | A_33_P3391375 | LANCL3       | 2.991763775 | 0.0000253   | up |
| 540 | A_23_P413923  | DMRTA1       | 2.991672048 | 0.009090189 | up |
| 541 | A_33_P3395028 | LOC152225    | 2.990030429 | 0.002580945 | up |
| 542 | A_23_P254079  | STBD1        | 2.989812131 | 0.0000336   | up |
| 543 | A_23_P146284  | SQLE         | 2.984020955 | 0.0000133   | up |
| 544 | A_33_P3380383 | TIFAB        | 2.983580012 | 0.002798356 | up |
| 545 | A_33_P3267081 | ZNF771       | 2.983548233 | 0.000000777 | up |
| 546 | A_23_P344555  | NEDD9        | 2.981349134 | 0.00000796  | up |
| 547 | A_23_P35444   | INA          | 2.980704451 | 0.00000752  | up |
| 548 | A_23_P121716  | ANXA3        | 2.979367661 | 0.00000328  | up |
| 549 | A_33_P3422802 | ULBP1        | 2.97886732  | 0.00000147  | up |
| 550 | A_23_P168403  | KCNH2        | 2.978425418 | 0.00000966  | up |
| 551 | A_33_P3356857 | KIF9         | 2.973908652 | 0.000954057 | up |
| 552 | A_23_P8196    | ME1          | 2.972663784 | 0.00000314  | up |
| 553 | A_33_P3406493 | GABBR2       | 2.968987872 | 0.0000446   | up |
| 554 | A_33_P3286846 | LOC653550    | 2.967573303 | 0.031550213 | up |
| 555 | A_23_P148990  | HMCN1        | 2.966935438 | 0.000000565 | up |
| 556 | A_24_P215240  | ENKUR        | 2.966137888 | 0.006347386 | up |
| 557 | A_32_P131640  | SLITRK4      | 2.965966974 | 0.0000814   | up |

|     |               |           |             |             |    |
|-----|---------------|-----------|-------------|-------------|----|
| 558 | A_24_P3005    | SCN9A     | 2.964886752 | 0.000000947 | up |
| 559 | A_23_P208009  | SEC11C    | 2.964269121 | 2.91E-08    | up |
| 560 | A_23_P54291   | DUOX1     | 2.963786791 | 0.001923157 | up |
| 561 | A_23_P98580   | FADS2     | 2.962139668 | 0.0000575   | up |
| 562 | A_23_P153930  | ACVR2A    | 2.958022104 | 0.000000181 | up |
| 563 | A_32_P210202  | E2F7      | 2.954538913 | 0.00000473  | up |
| 564 | A_33_P3266489 | OR13H1    | 2.950698879 | 0.000000361 | up |
| 565 | A_33_P3788618 | ACER2     | 2.949540393 | 0.017367854 | up |
| 566 | A_33_P3278868 | HEATR5A   | 2.944941209 | 0.00000741  | up |
| 567 | A_33_P3273629 | CCDC144A  | 2.944799004 | 0.000613163 | up |
| 568 | A_33_P3229370 | ID4       | 2.943328701 | 0.00000396  | up |
| 569 | A_33_P3388948 | SNX30     | 2.942903699 | 0.00000115  | up |
| 570 | A_33_P3246613 | CCDC78    | 2.940907687 | 0.000142676 | up |
| 571 | A_23_P156218  | GZMK      | 2.939934134 | 0.00000335  | up |
| 572 | A_33_P3233150 | ZSWIM4    | 2.938206242 | 0.00000732  | up |
| 573 | A_23_P114839  | FHL3      | 2.936737806 | 0.0000318   | up |
| 574 | A_24_P810290  | PPAPDC1A  | 2.932646135 | 0.0000111   | up |
| 575 | A_24_P182620  | CELSR2    | 2.929187748 | 0.00000173  | up |
| 576 | A_32_P42574   | C1orf198  | 2.928518213 | 0.000000516 | up |
| 577 | A_24_P317907  | SORBS1    | 2.925843155 | 0.0000202   | up |
| 578 | A_32_P76720   | NT5DC3    | 2.925678686 | 0.00000535  | up |
| 579 | A_23_P211428  | SMTN      | 2.925576683 | 0.000000725 | up |
| 580 | A_23_P83818   | COL5A1    | 2.916956085 | 0.002111124 | up |
| 581 | A_33_P3412463 | C10orf81  | 2.91683983  | 0.045665455 | up |
| 582 | A_24_P129417  | BMP1      | 2.915044687 | 0.001390594 | up |
| 583 | A_24_P522631  | TMEM201   | 2.914398182 | 0.000716972 | up |
| 584 | A_33_P3228305 | ARHGAP26  | 2.91344754  | 0.00000145  | up |
| 585 | A_23_P33664   | ELSPBP1   | 2.912492834 | 0.000501072 | up |
| 586 | A_23_P203947  | DDX11     | 2.911088434 | 0.00000583  | up |
| 587 | A_33_P3243702 | KLHL30    | 2.90979416  | 0.0000732   | up |
| 588 | A_24_P250922  | PTGS2     | 2.905685715 | 0.00000736  | up |
| 589 | A_32_P140489  | GDF6      | 2.902591943 | 0.000000283 | up |
| 590 | A_23_P133386  | RASGRF2   | 2.902491616 | 0.00000199  | up |
| 591 | A_33_P3372288 | ZNF81     | 2.899565443 | 0.004904303 | up |
| 592 | A_23_P11032   | SLC9A7    | 2.899414442 | 0.000611295 | up |
| 593 | A_33_P3299160 | LOC440131 | 2.899360113 | 0.002366629 | up |
| 594 | A_32_P207124  | CT47A11   | 2.898528491 | 0.000000329 | up |
| 595 | A_23_P93531   | TAAR1     | 2.89755223  | 0.000979777 | up |
| 596 | A_24_P336577  | C1orf183  | 2.895286402 | 0.0000545   | up |
| 597 | A_23_P216812  | CDKN2B    | 2.892686746 | 0.046165091 | up |
| 598 | A_23_P371266  | DNM3      | 2.890325552 | 0.00012685  | up |
| 599 | A_33_P3278313 | MSRB3     | 2.889899189 | 0.000000412 | up |
| 600 | A_33_P3423979 | PALLD     | 2.889304455 | 0.007121089 | up |
| 601 | A_23_P316381  | ACOX3     | 2.881141467 | 0.00000103  | up |
| 602 | A_33_P3420235 | ARPC5     | 2.876679909 | 0.0000104   | up |
| 603 | A_23_P347048  | SGPP1     | 2.874912804 | 0.000123068 | up |
| 604 | A_33_P3343467 | FLJ35390  | 2.869230092 | 0.002720473 | up |
| 605 | A_23_P334751  | B3GALNT2  | 2.868742414 | 0.00000623  | up |
| 606 | A_24_P144784  | HILS1     | 2.868403534 | 0.00000368  | up |
| 607 | A_33_P3238548 | C3orf36   | 2.867592452 | 0.000129822 | up |
| 608 | A_33_P3310784 | TM6SF1    | 2.867046361 | 0.00000259  | up |

|     |               |           |             |             |    |
|-----|---------------|-----------|-------------|-------------|----|
| 609 | A_33_P3307495 | STRA6     | 2.866542164 | 0.000399811 | up |
| 610 | A_23_P200579  | CELA3B    | 2.866444475 | 0.04472812  | up |
| 611 | A_24_P100368  | DYNLT3    | 2.866011702 | 0.000161102 | up |
| 612 | A_33_P3358601 | IFITM10   | 2.863049605 | 0.000015    | up |
| 613 | A_24_P270033  | MPZL3     | 2.86293186  | 0.00065933  | up |
| 614 | A_23_P214011  | CDH6      | 2.857279563 | 0.0000139   | up |
| 615 | A_23_P35148   | TAF13     | 2.855482085 | 0.000000151 | up |
| 616 | A_33_P3313622 | MIR17HG   | 2.855286804 | 0.033182548 | up |
| 617 | A_33_P3230528 | MPRIP     | 2.852297898 | 0.000000196 | up |
| 618 | A_24_P942773  | SLMAP     | 2.852255062 | 0.000000314 | up |
| 619 | A_33_P3214665 | MAP2      | 2.84854823  | 0.00000865  | up |
| 620 | A_23_P356616  | ABTB2     | 2.843011629 | 0.00000895  | up |
| 621 | A_33_P3670415 | NAT8L     | 2.840295631 | 0.000161337 | up |
| 622 | A_24_P134392  | HSPA13    | 2.838051954 | 0.000000507 | up |
| 623 | A_23_P161424  | PLXDC2    | 2.835322483 | 0.00000201  | up |
| 624 | A_24_P282547  | CFHR4     | 2.82932721  | 0.000165989 | up |
| 625 | A_23_P368645  | AGPS      | 2.828615341 | 0.00000212  | up |
| 626 | A_23_P59099   | OR11A1    | 2.828171681 | 0.000259153 | up |
| 627 | A_23_P133694  | SLC29A1   | 2.827471208 | 0.00000682  | up |
| 628 | A_23_P125475  | GABRQ     | 2.826871687 | 0.027876374 | up |
| 629 | A_23_P144959  | VCAN      | 2.825248758 | 0.000000604 | up |
| 630 | A_33_P3261862 | OR2A42    | 2.823171295 | 0.000000102 | up |
| 631 | A_23_P359214  | LOC643650 | 2.822062618 | 0.000000506 | up |
| 632 | A_33_P3303542 | SSC5D     | 2.820318964 | 0.000000558 | up |
| 633 | A_33_P3344482 | FERMT2    | 2.818534383 | 0.00000082  | up |
| 634 | A_32_P159445  | IQSEC2    | 2.81677013  | 0.000296658 | up |
| 635 | A_23_P58009   | C3orf52   | 2.816103451 | 0.000283751 | up |
| 636 | A_23_P416314  | HRASLS5   | 2.811934521 | 0.000249546 | up |
| 637 | A_23_P210358  | LIMS1     | 2.810230303 | 0.000344009 | up |
| 638 | A_23_P375524  | LCE1D     | 2.810086746 | 0.001733699 | up |
| 639 | A_33_P3239185 | SYT7      | 2.809631647 | 0.000016    | up |
| 640 | A_24_P79054   | TGFB1     | 2.809231791 | 0.002013339 | up |
| 641 | A_33_P3388651 | ABLIM1    | 2.808725561 | 0.0000229   | up |
| 642 | A_33_P3265222 | KIAA1324  | 2.806531658 | 0.0000884   | up |
| 643 | A_33_P3604591 | SNORA78   | 2.804793647 | 0.002796093 | up |
| 644 | A_23_P47614   | PHLDA2    | 2.803373557 | 0.0000953   | up |
| 645 | A_23_P23850   | DAB1      | 2.802901022 | 0.020293471 | up |
| 646 | A_23_P150741  | C2CD3     | 2.800758002 | 0.00000316  | up |
| 647 | A_23_P371865  | CDYL2     | 2.796560096 | 0.00000645  | up |
| 648 | A_33_P3235531 | CD1D      | 2.794801849 | 0.000454224 | up |
| 649 | A_23_P111724  | RUNDC3B   | 2.789565319 | 0.00000805  | up |
| 650 | A_23_P126649  | PGBD5     | 2.788327459 | 0.000445277 | up |
| 651 | A_24_P210569  | SCG3      | 2.786518696 | 0.030406041 | up |
| 652 | A_32_P104063  | CRNDE     | 2.785724461 | 0.00000933  | up |
| 653 | A_23_P103864  | TTC13     | 2.785377111 | 0.0000227   | up |
| 654 | A_33_P3229241 | HIST2H2BF | 2.785306964 | 0.0000118   | up |
| 655 | A_23_P120435  | WFDC3     | 2.783928194 | 0.00000554  | up |
| 656 | A_24_P122137  | LIF       | 2.781983121 | 0.00000819  | up |
| 657 | A_23_P65618   | TGM1      | 2.781439772 | 0.0000157   | up |
| 658 | A_23_P3038    | GPX2      | 2.780842366 | 0.018681593 | up |
| 659 | A_23_P22224   | EIF4EBP1  | 2.776566276 | 0.00000236  | up |

|     |               |              |             |             |    |
|-----|---------------|--------------|-------------|-------------|----|
| 660 | A_24_P9346    | SYNGAP1      | 2.776553253 | 0.0000173   | up |
| 661 | A_24_P135753  | PTPLB        | 2.774191668 | 0.00000119  | up |
| 662 | A_23_P389897  | NGFR         | 2.769731256 | 0.00000139  | up |
| 663 | A_33_P3309799 | TRIM10       | 2.7680129   | 0.000434733 | up |
| 664 | A_33_P3239278 | OR4D10       | 2.767822961 | 0.000071    | up |
| 665 | A_23_P156880  | ENPP1        | 2.767452906 | 0.0000144   | up |
| 666 | A_33_P3340862 | TMEM88B      | 2.766687437 | 0.000333861 | up |
| 667 | A_33_P3274332 | UBE2J1       | 2.766096203 | 0.0000215   | up |
| 668 | A_23_P88099   | MCF2L        | 2.762382947 | 0.008373486 | up |
| 669 | A_23_P65129   | SPRYD3       | 2.761325704 | 0.00000176  | up |
| 670 | A_33_P3410599 | FAM46A       | 2.753161677 | 0.0000198   | up |
| 671 | A_24_P46130   | ACPP         | 2.751634724 | 0.0000135   | up |
| 672 | A_33_P3369760 | GLIPR2       | 2.748956035 | 0.00000292  | up |
| 673 | A_33_P3280521 | MFAP3L       | 2.748851873 | 0.00000326  | up |
| 674 | A_33_P3293391 | LOC642826    | 2.748238098 | 0.0000179   | up |
| 675 | A_23_P7535    | HRH2         | 2.745866718 | 0.035024734 | up |
| 676 | A_33_P3219870 | PNPLA2       | 2.745033965 | 0.00000216  | up |
| 677 | A_24_P406754  | LOXL4        | 2.744992422 | 0.000396448 | up |
| 678 | A_33_P3297978 | MYO1E        | 2.744248257 | 9.19E-08    | up |
| 679 | A_33_P3420466 | MATN3        | 2.743378343 | 0.0000127   | up |
| 680 | A_23_P401675  | MARVELD2     | 2.743031139 | 0.0000305   | up |
| 681 | A_33_P3313421 | UHRF1BP1     | 2.743026703 | 0.0000152   | up |
| 682 | A_23_P392470  | NR3C2        | 2.742462322 | 0.0000135   | up |
| 683 | A_33_P3250055 | MAPK12       | 2.740807175 | 0.000651086 | up |
| 684 | A_23_P419239  | ETNK1        | 2.740461436 | 0.00000453  | up |
| 685 | A_33_P3252974 | SCRT2        | 2.738990509 | 0.02224433  | up |
| 686 | A_33_P3332382 | LOC100129401 | 2.738116821 | 0.00000281  | up |
| 687 | A_23_P206501  | CLEC18B      | 2.734981675 | 0.0000409   | up |
| 688 | A_23_P258088  | PACSN1       | 2.734390014 | 0.00000041  | up |
| 689 | A_23_P301572  | FAM184B      | 2.730522289 | 0.000000721 | up |
| 690 | A_23_P216549  | RUSC2        | 2.727714719 | 0.001314298 | up |
| 691 | A_23_P128174  | RAB3IP       | 2.724402133 | 0.0000468   | up |
| 692 | A_23_P424900  | C1orf88      | 2.724245588 | 0.00000272  | up |
| 693 | A_23_P43164   | SULF1        | 2.723480681 | 0.000000614 | up |
| 694 | A_33_P3254460 | DLK2         | 2.721758381 | 0.00000334  | up |
| 695 | A_24_P141707  | INHBE        | 2.719384277 | 0.00000114  | up |
| 696 | A_33_P3306654 | LOC10013155  | 2.718638511 | 0.000883657 | up |
| 697 | A_23_P150583  | SCGB1A1      | 2.714961362 | 0.000873174 | up |
| 698 | A_24_P703830  | NANOS3       | 2.714426337 | 0.000000219 | up |
| 699 | A_33_P3363245 | NXPH4        | 2.713579169 | 0.0000578   | up |
| 700 | A_33_P3394312 | OR2A2        | 2.709778946 | 0.0000179   | up |
| 701 | A_33_P3259775 | DOCK5        | 2.706758485 | 0.001405155 | up |
| 702 | A_33_P3280811 | TTC16        | 2.705909021 | 0.004666535 | up |
| 703 | A_23_P131596  | PRADC1       | 2.705469105 | 0.000000361 | up |
| 704 | A_33_P3227793 | CGREF1       | 2.704547683 | 0.000751992 | up |
| 705 | A_33_P3398998 | C2orf50      | 2.704455202 | 0.000182222 | up |
| 706 | A_33_P3293474 | OPN3         | 2.702964692 | 0.006517494 | up |
| 707 | A_33_P3369834 | REEP6        | 2.702413924 | 0.000752578 | up |
| 708 | A_23_P76460   | MYF6         | 2.700694588 | 0.000253742 | up |
| 709 | A_32_P313405  | LAMA1        | 2.699034778 | 0.0000181   | up |
| 710 | A_23_P92261   | ECE2         | 2.695805666 | 0.000000813 | up |

|     |               |             |             |             |    |
|-----|---------------|-------------|-------------|-------------|----|
| 711 | A_23_P49338   | TNFRSF12A   | 2.691789883 | 0.000104402 | up |
| 712 | A_23_P250694  | TSGA13      | 2.691725949 | 0.005880978 | up |
| 713 | A_33_P3327097 | MTMR1       | 2.687279224 | 0.000069    | up |
| 714 | A_33_P3294986 | LIPE        | 2.687222288 | 0.00000375  | up |
| 715 | A_23_P19592   | PGM3        | 2.687062727 | 0.00000399  | up |
| 716 | A_23_P204980  | UGGT2       | 2.684646994 | 0.000027    | up |
| 717 | A_23_P259521  | WDR41       | 2.683445957 | 0.00000642  | up |
| 718 | A_23_P25674   | CKB         | 2.675583092 | 0.000000098 | up |
| 719 | A_33_P3292896 | SFXN5       | 2.674614253 | 0.005806584 | up |
| 720 | A_23_P63825   | GOT1        | 2.67115248  | 0.00000139  | up |
| 721 | A_23_P31921   | ASS1        | 2.670806889 | 0.003754564 | up |
| 722 | A_23_P167129  | HHIP        | 2.668140799 | 0.004647351 | up |
| 723 | A_23_P87500   | ORMDL2      | 2.666998229 | 0.00000357  | up |
| 724 | A_33_P3419790 | C6orf105    | 2.665198524 | 0.022352864 | up |
| 725 | A_24_P363896  | COL27A1     | 2.664806294 | 0.000499132 | up |
| 726 | A_33_P3306207 | KLRG2       | 2.662980135 | 0.000335463 | up |
| 727 | A_33_P3292402 | LRRIQ3      | 2.661001518 | 0.000197862 | up |
| 728 | A_32_P315395  | MGC16275    | 2.660483581 | 0.000239851 | up |
| 729 | A_33_P3277579 | ZFYVE28     | 2.660113863 | 0.003775313 | up |
| 730 | A_24_P160202  | PANX2       | 2.660097576 | 0.021110349 | up |
| 731 | A_33_P3257330 | DCBLD1      | 2.659167214 | 0.009201801 | up |
| 732 | A_33_P3245248 | TERC        | 2.658827781 | 0.002110343 | up |
| 733 | A_23_P161218  | ANKRD1      | 2.658285085 | 0.001718041 | up |
| 734 | A_33_P3221177 | ZDHHC20     | 2.658186018 | 0.000406174 | up |
| 735 | A_23_P304450  | GATA6       | 2.657425966 | 0.000000163 | up |
| 736 | A_24_P683011  | LOC10012798 | 2.65597457  | 0.000000377 | up |
| 737 | A_23_P351215  | SKIL        | 2.65422192  | 0.000019    | up |
| 738 | A_32_P118372  | INTU        | 2.653588135 | 0.000000284 | up |
| 739 | A_33_P3220149 | MAML1       | 2.65283326  | 0.000142899 | up |
| 740 | A_23_P315212  | NTSR2       | 2.652317832 | 0.00000114  | up |
| 741 | A_24_P914940  | MEF2BNB     | 2.651311351 | 0.0000467   | up |
| 742 | A_23_P137532  | PLOD1       | 2.646205249 | 0.000406563 | up |
| 743 | A_33_P3277097 | LY6G6E      | 2.642697694 | 0.000693911 | up |
| 744 | A_23_P405129  | LTBP2       | 2.637669915 | 0.00000777  | up |
| 745 | A_24_P684186  | EMB         | 2.637631217 | 0.00000399  | up |
| 746 | A_33_P3805090 | FNIP2       | 2.637031248 | 0.0000303   | up |
| 747 | A_33_P3424057 | PEG3        | 2.635925508 | 0.002786363 | up |
| 748 | A_33_P3244753 | DRP2        | 2.635247564 | 0.000000389 | up |
| 749 | A_23_P252201  | EAF2        | 2.633819235 | 0.0000413   | up |
| 750 | A_23_P170857  | IL1RAP      | 2.627662525 | 0.0000102   | up |
| 751 | A_23_P31135   | ACAT2       | 2.626482854 | 0.0000509   | up |
| 752 | A_33_P3337267 | NRARP       | 2.626186609 | 0.002500074 | up |
| 753 | A_23_P250478  | PDK3        | 2.625605926 | 0.00015882  | up |
| 754 | A_33_P3415895 | NRBF2       | 2.62265705  | 0.000000128 | up |
| 755 | A_23_P64404   | FADS3       | 2.621589258 | 0.012084396 | up |
| 756 | A_32_P148345  | ANXA2       | 2.62030485  | 0.0000298   | up |
| 757 | A_23_P353005  | RNF217      | 2.619735818 | 0.00000189  | up |
| 758 | A_23_P368886  | CHSY3       | 2.619160011 | 0.00000249  | up |
| 759 | A_23_P120103  | KCNS3       | 2.618862715 | 0.00321226  | up |
| 760 | A_33_P3314276 | ASPHD1      | 2.61754136  | 0.0000935   | up |
| 761 | A_23_P436158  | TLL2        | 2.617489954 | 0.04830929  | up |



|     |               |              |             |             |    |
|-----|---------------|--------------|-------------|-------------|----|
| 762 | A_23_P94319   | KBTBD11      | 2.617175191 | 0.0000291   | up |
| 763 | A_24_P79403   | PF4          | 2.615365599 | 0.000409081 | up |
| 764 | A_23_P81441   | C5orf20      | 2.612326942 | 0.000000357 | up |
| 765 | A_23_P250274  | LRRRC8A      | 2.611831816 | 0.0000276   | up |
| 766 | A_33_P3347707 | NOVA2        | 2.607838208 | 0.043952518 | up |
| 767 | A_33_P3258772 | LOC100506811 | 2.606605645 | 0.012051632 | up |
| 768 | A_24_P238118  | PP12613      | 2.603426722 | 0.000147742 | up |
| 769 | A_33_P3462422 | THEMIS       | 2.601560335 | 0.000173406 | up |
| 770 | A_33_P3799692 | LOC338620    | 2.600228064 | 0.00000221  | up |
| 771 | A_33_P3336287 | SEC61A2      | 2.599968841 | 0.019840937 | up |
| 772 | A_33_P3408244 | SPRNP1       | 2.59951882  | 0.000916883 | up |
| 773 | A_23_P4036    | TEX2         | 2.598693524 | 0.000114134 | up |
| 774 | A_23_P217208  | SLC35A2      | 2.597053378 | 0.0000063   | up |
| 775 | A_23_P25913   | DNAL1        | 2.5934342   | 0.0000451   | up |
| 776 | A_33_P3272539 | PLEKHG5      | 2.59070282  | 0.0000383   | up |
| 777 | A_33_P3249489 | WDR89        | 2.588241913 | 0.00000039  | up |
| 778 | A_23_P153571  | IGFL2        | 2.587200447 | 0.000529757 | up |
| 779 | A_24_P216361  | PRAME        | 2.586365079 | 0.039257074 | up |
| 780 | A_23_P307502  | C9orf53      | 2.58546164  | 0.007553768 | up |
| 781 | A_23_P160503  | GLRX2        | 2.584815368 | 0.000000179 | up |
| 782 | A_23_P167040  | PDIA5        | 2.584590405 | 0.00000232  | up |
| 783 | A_33_P3282434 | SLC16A1      | 2.582850428 | 0.00000652  | up |
| 784 | A_23_P160460  | UAP1         | 2.582527121 | 0.000000637 | up |
| 785 | A_33_P3283669 | ATP1A3       | 2.580368601 | 0.000000766 | up |
| 786 | A_23_P122068  | C1QTNF3      | 2.579981999 | 0.00000989  | up |
| 787 | A_33_P3422113 | ZSCAN12P1    | 2.577447247 | 0.002381933 | up |
| 788 | A_23_P46470   | ERRF11       | 2.575678038 | 0.00000108  | up |
| 789 | A_23_P410110  | C10orf25     | 2.575502428 | 0.000260157 | up |
| 790 | A_33_P3275435 | LOC100216541 | 2.573901421 | 0.00000379  | up |
| 791 | A_33_P3329344 | FASN         | 2.573433734 | 2.13E-08    | up |
| 792 | A_33_P3395758 | C14orf28     | 2.57224786  | 0.0000107   | up |
| 793 | A_23_P352389  | C17orf46     | 2.570680534 | 0.000000115 | up |
| 794 | A_33_P3399248 | UFM1         | 2.570250548 | 0.0000568   | up |
| 795 | A_23_P204158  | RNFT2        | 2.569855368 | 0.0000792   | up |
| 796 | A_33_P3387621 | RHPN2        | 2.568482065 | 0.00000223  | up |
| 797 | A_32_P78816   | PSPH         | 2.567990146 | 0.0000368   | up |
| 798 | A_33_P3367201 | MMAB         | 2.566795454 | 0.0000224   | up |
| 799 | A_32_P377880  | GDNF         | 2.565789532 | 0.0000612   | up |
| 800 | A_32_P208120  | CAMK1D       | 2.564724746 | 0.00000561  | up |
| 801 | A_23_P74330   | MGC4473      | 2.561196659 | 0.00000239  | up |
| 802 | A_23_P28598   | DLX2         | 2.56000152  | 0.000000469 | up |
| 803 | A_33_P3281572 | CMAHP        | 2.559685449 | 0.0000437   | up |
| 804 | A_33_P3242923 | LOC283553    | 2.557596485 | 0.00000379  | up |
| 805 | A_23_P115022  | TMEM125      | 2.556387373 | 0.001970626 | up |
| 806 | A_23_P30495   | HMGCR        | 2.555794783 | 0.0000456   | up |
| 807 | A_23_P42695   | GGCT         | 2.554786384 | 0.00000507  | up |
| 808 | A_23_P205031  | COL4A2       | 2.55456073  | 0.000000823 | up |
| 809 | A_33_P3426943 | LOC151484    | 2.549874072 | 0.028885868 | up |
| 810 | A_32_P121085  | DOK3         | 2.547172149 | 0.0000363   | up |
| 811 | A_23_P16944   | SDC1         | 2.546703199 | 8.45E-08    | up |
| 812 | A_24_P253003  | WNT11        | 2.542762058 | 0.000167543 | up |

|     |               |             |             |             |    |
|-----|---------------|-------------|-------------|-------------|----|
| 813 | A_33_P3270203 | DIS3L2      | 2.542716116 | 0.004669954 | up |
| 814 | A_33_P3213707 | PDCD1LG2    | 2.541968231 | 0.00000214  | up |
| 815 | A_33_P3309491 | PTPRU       | 2.541726678 | 0.000000238 | up |
| 816 | A_23_P15174   | MT1F        | 2.536912335 | 0.0000117   | up |
| 817 | A_24_P314477  | TUBB2B      | 2.536455998 | 0.000000489 | up |
| 818 | A_32_P3476    | RPRML       | 2.534920203 | 0.002544185 | up |
| 819 | A_23_P65157   | COX17       | 2.534260215 | 0.0000254   | up |
| 820 | A_33_P3372212 | PSG10P      | 2.531489207 | 0.0000604   | up |
| 821 | A_33_P3413038 | PLXNB3      | 2.531343279 | 0.000000861 | up |
| 822 | A_23_P153628  | YIF1B       | 2.53030413  | 0.000694607 | up |
| 823 | A_33_P3211734 | SIKE1       | 2.530240757 | 0.0000772   | up |
| 824 | A_32_P452655  | LGALS9C     | 2.52839757  | 0.0000162   | up |
| 825 | A_23_P15844   | BRIP1       | 2.527308302 | 0.0000708   | up |
| 826 | A_33_P3329839 | CDK2AP2     | 2.524465859 | 0.00000454  | up |
| 827 | A_23_P125717  | NAP1L3      | 2.524211272 | 0.00000501  | up |
| 828 | A_33_P3280405 | OR7E37P     | 2.524188527 | 0.00000431  | up |
| 829 | A_33_P3322859 | HES6        | 2.523581186 | 0.000228934 | up |
| 830 | A_24_P187970  | PADI2       | 2.523163916 | 0.013516634 | up |
| 831 | A_24_P149036  | DPYSL3      | 2.521857051 | 0.00000851  | up |
| 832 | A_23_P205074  | SLC46A3     | 2.519853453 | 0.00000486  | up |
| 833 | A_23_P132175  | RTN4R       | 2.51950386  | 0.0000435   | up |
| 834 | A_33_P3331188 | ARHGAP23    | 2.519462355 | 0.000224029 | up |
| 835 | A_23_P259442  | CPE         | 2.518083575 | 0.0000224   | up |
| 836 | A_33_P3412767 | SYDE2       | 2.517971872 | 0.000123424 | up |
| 837 | A_33_P3303772 | SLC6A3      | 2.517277037 | 0.039096045 | up |
| 838 | A_23_P70688   | LY86        | 2.51723458  | 0.000000159 | up |
| 839 | A_33_P3394699 | SCN2B       | 2.514071185 | 0.000460145 | up |
| 840 | A_33_P3264926 | SAMD4A      | 2.51032821  | 9.63E-08    | up |
| 841 | A_23_P29067   | TMPRSS2     | 2.510158505 | 0.0000871   | up |
| 842 | A_33_P3382412 | ZNF468      | 2.509489077 | 0.0000303   | up |
| 843 | A_33_P3209581 | IQSEC3      | 2.509414398 | 0.005197671 | up |
| 844 | A_23_P1029    | MFAP2       | 2.508665817 | 0.0000217   | up |
| 845 | A_24_P925040  | CAV2        | 2.508418097 | 0.0000013   | up |
| 846 | A_33_P3283061 | LOC10012834 | 2.507483777 | 0.000400173 | up |
| 847 | A_33_P3380751 | ST8SIA1     | 2.503726775 | 0.000441627 | up |
| 848 | A_24_P934126  | LOC10012803 | 2.502906966 | 0.00054733  | up |
| 849 | A_33_P3422030 | FXYD5       | 2.502688612 | 0.016376791 | up |
| 850 | A_33_P3252598 | DEFB136     | 2.502446108 | 0.000000668 | up |
| 851 | A_23_P210465  | PI3         | 2.502400721 | 0.000000299 | up |
| 852 | A_33_P3364268 | LBH         | 2.501132232 | 0.0000189   | up |
| 853 | A_23_P154986  | GGT1        | 2.500648821 | 0.0000254   | up |
| 854 | A_24_P152649  | LOC644189   | 2.49835069  | 0.0000442   | up |
| 855 | A_24_P154948  | GARS        | 2.497637321 | 0.0000102   | up |
| 856 | A_23_P118392  | RASD1       | 2.496371189 | 0.00000486  | up |
| 857 | A_33_P3382125 | LOC728675   | 2.494550945 | 0.0000117   | up |
| 858 | A_23_P151506  | PLEK2       | 2.494504664 | 0.00084111  | up |
| 859 | A_33_P3228722 | TBCD        | 2.493968367 | 0.006775761 | up |
| 860 | A_24_P462899  | CENPW       | 2.490313147 | 0.00000496  | up |
| 861 | A_33_P3402404 | SCN3B       | 2.487222662 | 0.000133453 | up |
| 862 | A_33_P3284939 | TMEM189     | 2.486308127 | 0.0000266   | up |
| 863 | A_33_P3398912 | SLC2A6      | 2.484629378 | 0.00000213  | up |

|     |               |              |             |             |    |
|-----|---------------|--------------|-------------|-------------|----|
| 864 | A_33_P3239134 | POM121L4P    | 2.48220683  | 9.76E-08    | up |
| 865 | A_24_P118196  | GXYLT2       | 2.481710792 | 0.0000129   | up |
| 866 | A_23_P110791  | CSF1R        | 2.481283534 | 0.000000238 | up |
| 867 | A_33_P3362371 | RTN3         | 2.480575153 | 0.0011174   | up |
| 868 | A_23_P47247   | TCP11L1      | 2.47915453  | 0.000000803 | up |
| 869 | A_32_P25437   | SLC12A2      | 2.478716315 | 0.0000166   | up |
| 870 | A_23_P38649   | MC2R         | 2.478016682 | 0.0000473   | up |
| 871 | A_23_P137381  | ID3          | 2.477978952 | 0.000398836 | up |
| 872 | A_24_P373152  | CFL2         | 2.475253755 | 0.00000057  | up |
| 873 | A_23_P418031  | IFFO2        | 2.474832126 | 0.00000829  | up |
| 874 | A_23_P167812  | RBM24        | 2.474083743 | 0.00000068  | up |
| 875 | A_33_P3267482 | KIAA1804     | 2.47373587  | 0.000657169 | up |
| 876 | A_32_P157391  | FOLH1B       | 2.472604794 | 0.000111381 | up |
| 877 | A_23_P353744  | LARP1B       | 2.471172007 | 0.00000433  | up |
| 878 | A_33_P3280385 | COL6A3       | 2.470831223 | 0.000028    | up |
| 879 | A_23_P211561  | MEI1         | 2.470286832 | 0.0000936   | up |
| 880 | A_33_P3419419 | PIK3C2B      | 2.469843393 | 0.000259306 | up |
| 881 | A_33_P3259821 | DOCK9        | 2.467856772 | 0.00000217  | up |
| 882 | A_32_P73796   | PPM1E        | 2.467428592 | 0.0000178   | up |
| 883 | A_24_P165450  | TTLL7        | 2.466995983 | 0.0000551   | up |
| 884 | A_33_P3217213 | PDLIM7       | 2.464715852 | 0.000911084 | up |
| 885 | A_24_P193295  | RAB15        | 2.463957833 | 0.0000178   | up |
| 886 | A_24_P943095  | SPECC1       | 2.463686636 | 0.00000103  | up |
| 887 | A_33_P3422265 | LOC729305    | 2.462239048 | 0.001349635 | up |
| 888 | A_23_P322704  | FAM177A1     | 2.461537071 | 0.000000984 | up |
| 889 | A_33_P3330991 | LOC10013423  | 2.458664869 | 0.000252962 | up |
| 890 | A_23_P85903   | TLR5         | 2.458171661 | 0.011339656 | up |
| 891 | A_33_P3216714 | DNAJC6       | 2.456333073 | 0.000182972 | up |
| 892 | A_33_P3331307 | CDC42EP3     | 2.455042727 | 0.000753023 | up |
| 893 | A_33_P3274009 | LOC100132961 | 2.454886799 | 0.0000876   | up |
| 894 | A_24_P323114  | ANXA2P3      | 2.454812214 | 0.00000101  | up |
| 895 | A_33_P3289356 | CD58         | 2.454657378 | 0.000000886 | up |
| 896 | A_32_P123514  | PABPC4L      | 2.453067275 | 0.00000695  | up |
| 897 | A_23_P138655  | CYP26A1      | 2.452269777 | 0.000802942 | up |
| 898 | A_23_P6413    | SELM         | 2.451806856 | 0.000001    | up |
| 899 | A_33_P3282181 | ARHGAP4      | 2.446876579 | 0.002994104 | up |
| 900 | A_24_P915196  | C9orf91      | 2.446737507 | 0.0000667   | up |
| 901 | A_33_P3296352 | PPM1B        | 2.445952974 | 0.033454856 | up |
| 902 | A_33_P3266928 | LMTK3        | 2.445869166 | 0.000589537 | up |
| 903 | A_23_P415643  | ZNF48        | 2.445835598 | 0.000000203 | up |
| 904 | A_33_P3305250 | PSMD5        | 2.445823222 | 0.001979121 | up |
| 905 | A_33_P3383205 | OK/SW-CL.58  | 2.445807173 | 0.000137573 | up |
| 906 | A_33_P3259522 | CDCP2        | 2.445595269 | 0.000181759 | up |
| 907 | A_23_P253586  | DOPEY2       | 2.445074911 | 0.0000278   | up |
| 908 | A_24_P161036  | ACOT1        | 2.442270502 | 0.00000339  | up |
| 909 | A_33_P3282489 | GCNT1        | 2.4413492   | 0.00000605  | up |
| 910 | A_32_P197340  | LOC285141    | 2.440470027 | 0.0000401   | up |
| 911 | A_23_P64860   | SELPLG       | 2.440433602 | 0.000108781 | up |
| 912 | A_33_P3237096 | INPP5F       | 2.440365657 | 0.00000806  | up |
| 913 | A_32_P6015    | MNX1         | 2.440088826 | 0.000113017 | up |
| 914 | A_32_P9382    | MZT1         | 2.438596956 | 0.00000631  | up |

|     |               |             |             |             |    |
|-----|---------------|-------------|-------------|-------------|----|
| 915 | A_23_P161698  | MMP3        | 2.434922746 | 0.000108401 | up |
| 916 | A_23_P388168  | RAB3B       | 2.432971634 | 0.0000835   | up |
| 917 | A_33_P3359012 | DUSP8       | 2.430326257 | 0.0000406   | up |
| 918 | A_33_P3229863 | LOC10012871 | 2.428306114 | 0.00000631  | up |
| 919 | A_23_P95790   | ITLN1       | 2.427744223 | 0.000505056 | up |
| 920 | A_33_P3241393 | SLC4A5      | 2.425428919 | 0.000000227 | up |
| 921 | A_23_P210425  | MYL9        | 2.424001682 | 0.03606866  | up |
| 922 | A_33_P3877739 | SMCR2       | 2.423358199 | 0.000222999 | up |
| 923 | A_23_P310972  | PCDHGB1     | 2.422726418 | 0.000311617 | up |
| 924 | A_23_P75529   | PKNOX2      | 2.422060105 | 0.00000971  | up |
| 925 | A_24_P134195  | MYADM       | 2.421711149 | 0.019160778 | up |
| 926 | A_24_P206047  | SLC25A4     | 2.420534963 | 0.0000566   | up |
| 927 | A_23_P253350  | C8orf4      | 2.420252664 | 0.0000043   | up |
| 928 | A_23_P80839   | MAP6D1      | 2.419944287 | 0.0000364   | up |
| 929 | A_33_P3671647 | LOC441025   | 2.41958815  | 0.0000103   | up |
| 930 | A_33_P3329549 | FBRS        | 2.417447681 | 0.024487306 | up |
| 931 | A_33_P3280801 | LMO7        | 2.41690539  | 0.00000977  | up |
| 932 | A_24_P42066   | GGT3P       | 2.416549701 | 0.00000305  | up |
| 933 | A_33_P3602006 | ADAT2       | 2.414010582 | 0.001407732 | up |
| 934 | A_23_P204579  | TDG         | 2.413714153 | 0.0000202   | up |
| 935 | A_23_P10858   | ANKLE2      | 2.412585604 | 0.0000113   | up |
| 936 | A_33_P3383071 | LOC10012843 | 2.412517097 | 0.000850681 | up |
| 937 | A_33_P3308105 | GGH         | 2.412482817 | 0.0000229   | up |
| 938 | A_23_P353574  | NEK7        | 2.412163447 | 0.000537639 | up |
| 939 | A_23_P387031  | COL23A1     | 2.41111534  | 0.011362539 | up |
| 940 | A_23_P315122  | EMX1        | 2.410929225 | 0.00532742  | up |
| 941 | A_23_P253389  | SLC4A2      | 2.4103439   | 0.024755157 | up |
| 942 | A_33_P3369317 | DNAJB5      | 2.410307868 | 0.002693827 | up |
| 943 | A_23_P204801  | SLC41A2     | 2.409721914 | 0.00000155  | up |
| 944 | A_23_P160940  | ABCA4       | 2.409494153 | 0.0000711   | up |
| 945 | A_33_P3218832 | RIMS1       | 2.409332489 | 0.0000889   | up |
| 946 | A_33_P3220570 | UBTD1       | 2.40783578  | 0.00000092  | up |
| 947 | A_23_P136405  | PDCD1       | 2.405301092 | 0.009939543 | up |
| 948 | A_23_P150198  | LOC440040   | 2.403972068 | 0.007789069 | up |
| 949 | A_33_P3489737 | NLN         | 2.403432301 | 1.37E-08    | up |
| 950 | A_23_P44836   | NT5DC2      | 2.402030828 | 0.000314377 | up |
| 951 | A_23_P75811   | SLC3A2      | 2.401730598 | 0.001023541 | up |
| 952 | A_23_P111092  | OR2H1       | 2.401095524 | 0.000152766 | up |
| 953 | A_33_P3213119 | HAS2-AS1    | 2.400673047 | 0.0000248   | up |
| 954 | A_24_P416961  | ARVCF       | 2.399438496 | 0.000129022 | up |
| 955 | A_33_P3388865 | LRRC10      | 2.399089867 | 0.021181312 | up |
| 956 | A_23_P119102  | VASP        | 2.398811288 | 0.0000585   | up |
| 957 | A_23_P92727   | RAI14       | 2.398690466 | 0.00000783  | up |
| 958 | A_33_P3211739 | CREB3L2     | 2.395400132 | 0.0000157   | up |
| 959 | A_33_P3222069 | SPHK1       | 2.394695411 | 0.00000629  | up |
| 960 | A_23_P218597  | NPAS2       | 2.394142791 | 0.0000396   | up |
| 961 | A_24_P200000  | STEAP3      | 2.393318442 | 0.001508995 | up |
| 962 | A_23_P413815  | VKORC1L1    | 2.391364145 | 0.000000285 | up |
| 963 | A_24_P230282  | VCX2        | 2.390602393 | 0.016611647 | up |
| 964 | A_33_P3387691 | SCML4       | 2.389885169 | 0.024563826 | up |
| 965 | A_33_P3417459 | SCARNA9L    | 2.389047271 | 0.000567189 | up |

|      |               |             |             |             |    |
|------|---------------|-------------|-------------|-------------|----|
| 966  | A_23_P371787  | KIAA0247    | 2.388134624 | 0.000011    | up |
| 967  | A_24_P80138   | PDCL3       | 2.38764387  | 0.000323299 | up |
| 968  | A_33_P3850216 | TRIM55      | 2.386355533 | 0.0000997   | up |
| 969  | A_23_P318284  | GPD1L       | 2.385096933 | 0.00000084  | up |
| 970  | A_23_P258944  | DNAJB9      | 2.382487536 | 0.000000393 | up |
| 971  | A_23_P404685  | LCE1A       | 2.382394728 | 0.000368025 | up |
| 972  | A_33_P3235335 | MTMR3       | 2.38182431  | 0.01074812  | up |
| 973  | A_23_P349406  | RIMKLA      | 2.380498412 | 0.0387936   | up |
| 974  | A_33_P3230698 | KIF1A       | 2.379978048 | 0.00000539  | up |
| 975  | A_33_P3356701 | ZDHHC12     | 2.379810172 | 0.000000774 | up |
| 976  | A_24_P937405  | PRSS23      | 2.378730231 | 0.0000141   | up |
| 977  | A_33_P3287710 | LOC10012829 | 2.376793887 | 0.0000269   | up |
| 978  | A_24_P272290  | C6orf145    | 2.376588237 | 0.000225095 | up |
| 979  | A_23_P30363   | P4HA2       | 2.375545544 | 0.00000915  | up |
| 980  | A_33_P3257150 | CDC42       | 2.374923155 | 0.000107573 | up |
| 981  | A_23_P40847   | CHST2       | 2.373722028 | 0.00000736  | up |
| 982  | A_24_P117942  | TOMM20L     | 2.373661152 | 0.012568881 | up |
| 983  | A_23_P82478   | PUS7        | 2.372381237 | 0.0000876   | up |
| 984  | A_32_P110872  | A2LD1       | 2.372241905 | 0.00000619  | up |
| 985  | A_33_P3249976 | JAM2        | 2.36941893  | 0.0000093   | up |
| 986  | A_33_P3214035 | ADORA2A     | 2.368571134 | 0.019669782 | up |
| 987  | A_23_P408768  | DOT1L       | 2.367476601 | 0.0000887   | up |
| 988  | A_23_P165840  | ODC1        | 2.365593198 | 0.0000162   | up |
| 989  | A_33_P3326588 | TNFRSF10D   | 2.365171613 | 1.52E-08    | up |
| 990  | A_33_P3393766 | C17orf96    | 2.364230723 | 0.0000491   | up |
| 991  | A_33_P3421351 | TRAF3IP3    | 2.363434419 | 0.028052506 | up |
| 992  | A_33_P3215953 | MPZL1       | 2.360927381 | 0.00000703  | up |
| 993  | A_33_P3283833 | FOXS1       | 2.36070374  | 0.000121917 | up |
| 994  | A_33_P3224423 | POLM        | 2.359897993 | 0.0000337   | up |
| 995  | A_32_P194264  | CHAC2       | 2.358559778 | 0.011422589 | up |
| 996  | A_33_P3321462 | OR5B21      | 2.356586221 | 0.007836349 | up |
| 997  | A_33_P3335935 | HN1L        | 2.356146643 | 0.0000109   | up |
| 998  | A_23_P106544  | C16orf61    | 2.355246619 | 0.0000017   | up |
| 999  | A_23_P166400  | RASL10A     | 2.354705279 | 0.000000509 | up |
| 1000 | A_23_P43476   | VLDLR       | 2.350923999 | 0.000136441 | up |
| 1001 | A_33_P3243008 | KCNU1       | 2.350326741 | 0.0000206   | up |
| 1002 | A_23_P126388  | SH3BGRL3    | 2.350154603 | 0.00000178  | up |
| 1003 | A_23_P257111  | FBP1        | 2.349972705 | 0.008230729 | up |
| 1004 | A_32_P24376   | LOC730755   | 2.349608951 | 0.001248052 | up |
| 1005 | A_24_P332647  | SSH1        | 2.349325044 | 0.00000691  | up |
| 1006 | A_23_P58877   | GOPC        | 2.348982014 | 0.00000423  | up |
| 1007 | A_23_P252913  | BBS7        | 2.347603341 | 0.000004    | up |
| 1008 | A_24_P103886  | IDI1        | 2.347326185 | 0.000000561 | up |
| 1009 | A_23_P154065  | TUBA4A      | 2.345824906 | 0.00000661  | up |
| 1010 | A_23_P14515   | ACOT4       | 2.344107013 | 0.0000248   | up |
| 1011 | A_23_P166336  | TMEM191A    | 2.343683193 | 0.0000765   | up |
| 1012 | A_33_P3342628 | HES4        | 2.343470228 | 0.0000362   | up |
| 1013 | A_33_P3327608 | EML6        | 2.34304008  | 0.012948908 | up |
| 1014 | A_33_P3229953 | EEF1A2      | 2.3428714   | 0.001284546 | up |
| 1015 | A_23_P166306  | CBS         | 2.342241227 | 0.000000186 | up |
| 1016 | A_33_P3340490 | FLJ46906    | 2.341556203 | 0.00000369  | up |

|      |               |             |             |             |    |
|------|---------------|-------------|-------------|-------------|----|
| 1017 | A_33_P3412548 | LOC10013442 | 2.340798905 | 0.001954982 | up |
| 1018 | A_23_P144123  | SLC22A13    | 2.339676608 | 0.00000709  | up |
| 1019 | A_24_P76666   | CSNK2A1     | 2.338381413 | 0.00000708  | up |
| 1020 | A_33_P3386062 | LOC283585   | 2.335506025 | 0.0000905   | up |
| 1021 | A_23_P431388  | SPOCD1      | 2.335089694 | 0.0000901   | up |
| 1022 | A_23_P208698  | GYS1        | 2.33367825  | 0.0000121   | up |
| 1023 | A_33_P3327270 | TMED7-TICAM | 2.33216242  | 0.000360132 | up |
| 1024 | A_23_P171336  | NXF3        | 2.331904382 | 0.0000285   | up |
| 1025 | A_33_P3273125 | FAM106CP    | 2.331851151 | 0.038492593 | up |
| 1026 | A_23_P42897   | MGAM        | 2.329245975 | 0.007497294 | up |
| 1027 | A_33_P3421243 | AFP         | 2.329017802 | 0.000357908 | up |
| 1028 | A_23_P139648  | IAPP        | 2.329006501 | 0.001082031 | up |
| 1029 | A_24_P297537  | MAMSTR      | 2.328696299 | 0.0000214   | up |
| 1030 | A_32_P148796  | UBXN2B      | 2.328177952 | 0.000000376 | up |
| 1031 | A_24_P40094   | ATCAY       | 2.328139921 | 0.001098225 | up |
| 1032 | A_23_P71649   | MUSK        | 2.327467464 | 0.043453429 | up |
| 1033 | A_33_P3421571 | RAPH1       | 2.327443802 | 0.000200128 | up |
| 1034 | A_33_P3390335 | RSU1        | 2.324889262 | 0.0000887   | up |
| 1035 | A_33_P3329795 | SLC22A20    | 2.322783461 | 0.019374232 | up |
| 1036 | A_23_P363647  | DDX26B      | 2.322728989 | 0.00000156  | up |
| 1037 | A_24_P125839  | C21orf91    | 2.317146617 | 0.0000723   | up |
| 1038 | A_23_P363769  | KRT86       | 2.316875198 | 0.0000138   | up |
| 1039 | A_33_P3237634 | TSC22D3     | 2.316869738 | 0.000123078 | up |
| 1040 | A_23_P106145  | ERO1L       | 2.313163111 | 0.0000056   | up |
| 1041 | A_32_P87013   | IL8         | 2.312028102 | 0.000374338 | up |
| 1042 | A_23_P125829  | PGK1        | 2.311937398 | 0.000000313 | up |
| 1043 | A_33_P3288219 | FLJ45684    | 2.311638548 | 3.75E-08    | up |
| 1044 | A_23_P31376   | LRRN3       | 2.311011331 | 0.000415277 | up |
| 1045 | A_23_P9614    | NDUFA4L2    | 2.31080897  | 0.0238882   | up |
| 1046 | A_33_P3554053 | NCRNA00106  | 2.309652383 | 0.023997577 | up |
| 1047 | A_33_P3410925 | KLF1        | 2.30863703  | 0.000233198 | up |
| 1048 | A_33_P3419180 | LOC283547   | 2.307976445 | 0.0000906   | up |
| 1049 | A_24_P237586  | ANKRD37     | 2.306278916 | 0.0000766   | up |
| 1050 | A_33_P3420635 | OR4D6       | 2.30461171  | 0.000572183 | up |
| 1051 | A_23_P67381   | SULT2A1     | 2.304509955 | 0.002959954 | up |
| 1052 | A_33_P3257703 | C9orf131    | 2.303432785 | 0.021050298 | up |
| 1053 | A_23_P119593  | EPHX3       | 2.301972023 | 0.000742642 | up |
| 1054 | A_23_P319617  | CHST7       | 2.301896552 | 0.000000277 | up |
| 1055 | A_32_P140898  | FOXN2       | 2.301854271 | 0.000351313 | up |
| 1056 | A_33_P3352687 | LOC10013316 | 2.301509397 | 0.000148168 | up |
| 1057 | A_33_P3269844 | LRRC26      | 2.298550453 | 0.000505263 | up |
| 1058 | A_23_P162547  | MYL2        | 2.297289489 | 0.045895983 | up |
| 1059 | A_24_P62615   | CAP1        | 2.29447502  | 0.00000296  | up |
| 1060 | A_33_P3789382 | LOC84989    | 2.293919875 | 0.000101192 | up |
| 1061 | A_33_P3229012 | LOC652586   | 2.293899735 | 0.000608397 | up |
| 1062 | A_24_P112447  | ENTPD7      | 2.292997899 | 0.000065    | up |
| 1063 | A_23_P53345   | ARNTL2      | 2.290734991 | 0.0000127   | up |
| 1064 | A_23_P162579  | HSPB8       | 2.290399351 | 0.000138021 | up |
| 1065 | A_33_P3331085 | SEC24A      | 2.289665211 | 0.0000387   | up |
| 1066 | A_33_P3280400 | MGC72080    | 2.289409124 | 0.0000858   | up |
| 1067 | A_33_P3258013 | UBE3B       | 2.288641777 | 0.000157924 | up |

|      |               |             |             |             |    |
|------|---------------|-------------|-------------|-------------|----|
| 1068 | A_33_P3251322 | MTMR14      | 2.288436616 | 0.020414543 | up |
| 1069 | A_33_P3415087 | CLCN5       | 2.288369995 | 0.000504381 | up |
| 1070 | A_32_P58407   | KCND3       | 2.287380963 | 0.0000049   | up |
| 1071 | A_23_P407565  | CX3CR1      | 2.284700676 | 0.00000128  | up |
| 1072 | A_23_P428260  | STEAP2      | 2.282811918 | 0.0000323   | up |
| 1073 | A_33_P3794213 | LOC338653   | 2.281012996 | 0.00000163  | up |
| 1074 | A_33_P3702364 | SNX24       | 2.280996501 | 0.000296609 | up |
| 1075 | A_33_P3248424 | FAM105B     | 2.279342673 | 0.0000123   | up |
| 1076 | A_33_P3417222 | CD72        | 2.279226288 | 0.000977909 | up |
| 1077 | A_23_P422831  | FAM189A2    | 2.278466775 | 0.000769294 | up |
| 1078 | A_24_P925062  | MXRA7       | 2.27805856  | 0.0000296   | up |
| 1079 | A_33_P3447441 | LOC202025   | 2.277772615 | 0.00000282  | up |
| 1080 | A_23_P82334   | SLC25A13    | 2.277029528 | 0.0000027   | up |
| 1081 | A_24_P55225   | RSPH9       | 2.274808868 | 0.000935273 | up |
| 1082 | A_33_P3282566 | TMEM104     | 2.273554624 | 0.0000388   | up |
| 1083 | A_23_P51646   | PLK3        | 2.270476965 | 0.0000496   | up |
| 1084 | A_33_P3241884 | SDC3        | 2.269260134 | 0.000686401 | up |
| 1085 | A_33_P3314515 | NCRNA00119  | 2.269109137 | 0.000700437 | up |
| 1086 | A_23_P15369   | CD300LB     | 2.26737031  | 0.0000966   | up |
| 1087 | A_23_P372848  | P2RX1       | 2.26693077  | 0.0000111   | up |
| 1088 | A_33_P3286196 | KRTAP2-2    | 2.266630669 | 0.0000226   | up |
| 1089 | A_23_P357811  | MBNL1       | 2.266288088 | 0.00000582  | up |
| 1090 | A_33_P3324086 | CCDC90A     | 2.266243162 | 0.000000513 | up |
| 1091 | A_23_P85941   | ALX3        | 2.26606158  | 0.00000893  | up |
| 1092 | A_33_P3390950 | LOC10012833 | 2.265515718 | 0.001147477 | up |
| 1093 | A_24_P213161  | NLRP2       | 2.264778042 | 0.0000708   | up |
| 1094 | A_33_P3344618 | TFEB        | 2.263640205 | 0.0000151   | up |
| 1095 | A_23_P401774  | ELMOD1      | 2.263570122 | 0.000994297 | up |
| 1096 | A_23_P89343   | SNX11       | 2.263552864 | 0.000000652 | up |
| 1097 | A_33_P3316800 | AHR         | 2.263526191 | 0.00000112  | up |
| 1098 | A_33_P3341365 | RNF216      | 2.262397347 | 0.0000198   | up |
| 1099 | A_33_P3310455 | LOC644248   | 2.261482084 | 0.000656748 | up |
| 1100 | A_23_P150852  | ESYT1       | 2.260474328 | 0.0000343   | up |
| 1101 | A_23_P409623  | PPFIBP2     | 2.259327274 | 0.00000571  | up |
| 1102 | A_33_P3247204 | LOC619207   | 2.259257168 | 0.0000599   | up |
| 1103 | A_33_P3339070 | LOC10021600 | 2.258165983 | 0.0000491   | up |
| 1104 | A_32_P31771   | KIAA1715    | 2.258069671 | 0.00000376  | up |
| 1105 | A_33_P3357753 | LOC728190   | 2.257424181 | 0.00000653  | up |
| 1106 | A_24_P67681   | LOC10050867 | 2.256740342 | 0.0000336   | up |
| 1107 | A_23_P115726  | SLC16A9     | 2.256432935 | 0.000973947 | up |
| 1108 | A_23_P171077  | EBP         | 2.254632818 | 0.00000271  | up |
| 1109 | A_23_P36464   | C12orf11    | 2.253050005 | 0.00000165  | up |
| 1110 | A_23_P78099   | VTN         | 2.251083648 | 0.00000733  | up |
| 1111 | A_23_P60742   | MYLPF       | 2.248221739 | 0.00000357  | up |
| 1112 | A_24_P1054    | TONSL       | 2.247562498 | 0.010670512 | up |
| 1113 | A_33_P3305620 | TIPARP      | 2.245771118 | 0.000156051 | up |
| 1114 | A_23_P368338  | BET3L       | 2.244835403 | 0.008799836 | up |
| 1115 | A_33_P3345936 | CCDC9       | 2.244708074 | 0.001163419 | up |
| 1116 | A_33_P3325275 | NRSN2       | 2.244058055 | 0.000854435 | up |
| 1117 | A_33_P3279162 | NBPF6       | 2.242335265 | 0.000495727 | up |
| 1118 | A_23_P383278  | PYCRL       | 2.241336662 | 0.002877646 | up |

|      |               |            |             |             |    |
|------|---------------|------------|-------------|-------------|----|
| 1119 | A_32_P158083  | LHFPL3     | 2.241200936 | 0.000970766 | up |
| 1120 | A_23_P141021  | LPCAT2     | 2.240450212 | 0.000100647 | up |
| 1121 | A_33_P3376681 | GPR139     | 2.239557954 | 0.021981794 | up |
| 1122 | A_33_P3352073 | LOC401093  | 2.238640138 | 0.00000639  | up |
| 1123 | A_32_P181103  | GGCX       | 2.21653058  | 0.00000713  | up |
| 1124 | A_33_P3415191 | ATP8B1     | 2.214321954 | 0.00000472  | up |
| 1125 | A_32_P183970  | C15orf62   | 2.21423626  | 0.003588436 | up |
| 1126 | A_32_P170547  | CT45A5     | 2.213744414 | 0.000264983 | up |
| 1127 | A_33_P3368560 | AHSA2      | 2.212453295 | 0.000104362 | up |
| 1128 | A_23_P117873  | CHRM5      | 2.21235975  | 0.0000396   | up |
| 1129 | A_33_P3246248 | LOC729879  | 2.21175717  | 0.000381133 | up |
| 1130 | A_33_P3338152 | HIF3A      | 2.211735298 | 0.00023741  | up |
| 1131 | A_33_P3365750 | EML5       | 2.210727491 | 0.001609077 | up |
| 1132 | A_33_P3231252 | NHLH2      | 2.210712474 | 0.000000787 | up |
| 1133 | A_23_P42997   | CPSF4      | 2.210522369 | 1.93E-08    | up |
| 1134 | A_33_P3316878 | CHPF       | 2.209310717 | 0.000000222 | up |
| 1135 | A_33_P3216664 | LOC151174  | 2.209163455 | 0.000263041 | up |
| 1136 | A_23_P215525  | OSBPL3     | 2.208943472 | 0.00000927  | up |
| 1137 | A_33_P3405848 | TPO        | 2.208404379 | 0.00000193  | up |
| 1138 | A_23_P308042  | C6orf195   | 2.208392592 | 0.004343382 | up |
| 1139 | A_33_P3366120 | FLNA       | 2.207288183 | 0.004108924 | up |
| 1140 | A_33_P3252196 | EZH2       | 2.204004241 | 0.0000521   | up |
| 1141 | A_33_P3218356 | TMEM167B   | 2.202855609 | 0.0000249   | up |
| 1142 | A_23_P502312  | CD97       | 2.201982241 | 0.0000199   | up |
| 1143 | A_23_P72157   | MFSD7      | 2.200725947 | 0.0000138   | up |
| 1144 | A_23_P91636   | POM121L9P  | 2.200025583 | 0.0000418   | up |
| 1145 | A_24_P212811  | ANKRD34A   | 2.19890905  | 0.000224439 | up |
| 1146 | A_33_P3392580 | AK2        | 2.195750299 | 0.0000184   | up |
| 1147 | A_23_P166421  | TBC1D10A   | 2.195000802 | 0.000018    | up |
| 1148 | A_23_P254816  | TCF15      | 2.194058866 | 0.000115813 | up |
| 1149 | A_23_P108785  | ACTR3      | 2.194036206 | 0.000000246 | up |
| 1150 | A_33_P3418803 | C4orf44    | 2.193271889 | 0.009701783 | up |
| 1151 | A_33_P3286754 | SEC14L2    | 2.191860832 | 0.000107427 | up |
| 1152 | A_33_P3255304 | GGT5       | 2.190064207 | 0.00000122  | up |
| 1153 | A_24_P362904  | PFKFB4     | 2.189770993 | 0.0000354   | up |
| 1154 | A_32_P32391   | OR7E156P   | 2.189081246 | 0.0000283   | up |
| 1155 | A_23_P406616  | FLJ36031   | 2.188705227 | 0.000172025 | up |
| 1156 | A_23_P63190   | NRAS       | 2.188548466 | 0.00000242  | up |
| 1157 | A_23_P201918  | ABCB10     | 2.186628804 | 0.000000135 | up |
| 1158 | A_24_P750305  | LOC643837  | 2.185904441 | 0.0000555   | up |
| 1159 | A_23_P7896    | DUSP22     | 2.185663949 | 0.0000787   | up |
| 1160 | A_33_P3629247 | ANKMY1     | 2.185192081 | 0.0000522   | up |
| 1161 | A_32_P163805  | NCRNA00301 | 2.185176783 | 0.008652028 | up |
| 1162 | A_32_P416161  | XKRX       | 2.185009673 | 0.000395132 | up |
| 1163 | A_32_P175739  | HK2        | 2.1849289   | 0.000807275 | up |
| 1164 | A_33_P3215123 | RAP1GDS1   | 2.184303661 | 0.0000205   | up |
| 1165 | A_33_P3341586 | SIL1       | 2.184277721 | 0.0000567   | up |
| 1166 | A_33_P3233906 | RAMP1      | 2.183174779 | 0.000518961 | up |
| 1167 | A_33_P3361758 | C15orf33   | 2.183068904 | 0.000342076 | up |
| 1168 | A_24_P258846  | NFATC1     | 2.182665424 | 0.000128859 | up |
| 1169 | A_33_P3306287 | METTTL16   | 2.181796684 | 0.0000101   | up |



|      |               |             |             |             |    |
|------|---------------|-------------|-------------|-------------|----|
| 1170 | A_24_P557479  | XAF1        | 2.1798079   | 0.0000216   | up |
| 1171 | A_23_P127579  | PTS         | 2.178356935 | 0.000000465 | up |
| 1172 | A_24_P769672  | C12orf73    | 2.17799705  | 0.0000165   | up |
| 1173 | A_23_P122863  | GRB10       | 2.177872757 | 0.00000583  | up |
| 1174 | A_33_P3415843 | CRAT        | 2.1767645   | 0.0000386   | up |
| 1175 | A_33_P3311503 | SMR3B       | 2.176622675 | 0.00000773  | up |
| 1176 | A_33_P3314466 | IMMT        | 2.175826971 | 0.000000247 | up |
| 1177 | A_33_P3209351 | IARS        | 2.175451721 | 0.000025    | up |
| 1178 | A_33_P3383331 | SLC35A3     | 2.175278821 | 0.000000403 | up |
| 1179 | A_33_P3416231 | HOXA9       | 2.175221275 | 0.000081    | up |
| 1180 | A_23_P171132  | EDA2R       | 2.174978792 | 0.0000877   | up |
| 1181 | A_33_P3365845 | NUPL1       | 2.174831808 | 0.004882189 | up |
| 1182 | A_24_P348083  | C18orf23    | 2.173607326 | 0.000651994 | up |
| 1183 | A_24_P913227  | CDC23       | 2.172998131 | 0.000356592 | up |
| 1184 | A_33_P3248602 | DUX4        | 2.171324475 | 0.036137308 | up |
| 1185 | A_23_P29769   | WWTR1       | 2.170969764 | 0.00000451  | up |
| 1186 | A_23_P6119    | SEC23B      | 2.169256773 | 0.000000936 | up |
| 1187 | A_33_P3672756 | LOC284561   | 2.169245997 | 0.00197723  | up |
| 1188 | A_33_P3419785 | BNIP3       | 2.168799221 | 0.00000099  | up |
| 1189 | A_23_P93524   | SAMD3       | 2.168795713 | 0.0000756   | up |
| 1190 | A_23_P376557  | MMP25       | 2.167324487 | 0.0000575   | up |
| 1191 | A_33_P3252394 | GADD45G     | 2.167281172 | 0.0000713   | up |
| 1192 | A_33_P3272823 | MAG         | 2.167135108 | 0.006164622 | up |
| 1193 | A_23_P101013  | TMC6        | 2.166299927 | 0.000107772 | up |
| 1194 | A_33_P3407414 | LOC92249    | 2.166105884 | 0.000000679 | up |
| 1195 | A_23_P80773   | SRPRB       | 2.16514213  | 0.00000321  | up |
| 1196 | A_23_P134058  | GFOD1       | 2.164641984 | 0.000001    | up |
| 1197 | A_33_P3702055 | SLC11A1     | 2.164095151 | 0.000154336 | up |
| 1198 | A_33_P3415859 | NLRC3       | 2.164044751 | 0.000669454 | up |
| 1199 | A_23_P78762   | HSD17B14    | 2.163749421 | 0.002828015 | up |
| 1200 | A_24_P929369  | AP4E1       | 2.163148636 | 6.45E-08    | up |
| 1201 | A_24_P326491  | MKX         | 2.162239502 | 0.000079    | up |
| 1202 | A_24_P307289  | TMEM95      | 2.16119922  | 0.004454017 | up |
| 1203 | A_32_P226646  | LOC10012978 | 2.160800232 | 0.0000151   | up |
| 1204 | A_33_P3385762 | OR52W1      | 2.16054498  | 0.000156348 | up |
| 1205 | A_23_P48088   | CD27        | 2.16007609  | 0.031269693 | up |
| 1206 | A_33_P3271530 | PGAP1       | 2.159928167 | 0.0000773   | up |
| 1207 | A_23_P346291  | GPR173      | 2.159742778 | 5.59E-09    | up |
| 1208 | A_33_P3364884 | PDHB        | 2.158898125 | 0.00000192  | up |
| 1209 | A_33_P3333488 | HAGH        | 2.15843438  | 9.54E-08    | up |
| 1210 | A_33_P3253807 | CEBPG       | 2.158211621 | 0.0000148   | up |
| 1211 | A_24_P910688  | LOC10050904 | 2.158096186 | 0.00000889  | up |
| 1212 | A_23_P117851  | CPLX3       | 2.154454554 | 0.0000181   | up |
| 1213 | A_32_P134007  | XKR4        | 2.154049445 | 0.025870408 | up |
| 1214 | A_33_P3417502 | WNT3A       | 2.153670089 | 0.0000151   | up |
| 1215 | A_33_P3347622 | MOBKL1A     | 2.153315675 | 0.000245302 | up |
| 1216 | A_33_P3304878 | WDFY4       | 2.150140448 | 0.023802787 | up |
| 1217 | A_33_P3797897 | LOC494558   | 2.149283808 | 0.024230129 | up |
| 1218 | A_24_P69053   | ODZ3        | 2.14927487  | 0.008731335 | up |
| 1219 | A_33_P3275600 | PLA2G4E     | 2.148552058 | 0.028786974 | up |
| 1220 | A_33_P3415678 | MKL1        | 2.14802681  | 0.00050696  | up |

|      |               |             |             |             |    |
|------|---------------|-------------|-------------|-------------|----|
| 1221 | A_33_P3287646 | HSPB1       | 2.14788388  | 0.00000182  | up |
| 1222 | A_24_P942481  | GPR180      | 2.147809442 | 0.0000043   | up |
| 1223 | A_33_P3307133 | GRIK2       | 2.145519579 | 0.007085435 | up |
| 1224 | A_33_P3221761 | MLL4        | 2.14541092  | 0.009837579 | up |
| 1225 | A_33_P3409580 | LOC10012972 | 2.144912804 | 0.012760801 | up |
| 1226 | A_23_P373119  | HMGB3P1     | 2.143548213 | 0.0000059   | up |
| 1227 | A_23_P87363   | ART1        | 2.143447379 | 0.0000611   | up |
| 1228 | A_23_P18641   | SNX25       | 2.14234476  | 0.0000252   | up |
| 1229 | A_24_P204244  | ANXA2P1     | 2.141042351 | 0.00000247  | up |
| 1230 | A_33_P3337977 | FIG4        | 2.140393916 | 0.00028897  | up |
| 1231 | A_33_P3373298 | STAG3L4     | 2.140371563 | 0.000129946 | up |
| 1232 | A_33_P3305433 | LOC10013138 | 2.140020228 | 0.036546071 | up |
| 1233 | A_24_P56130   | MYL6        | 2.139307894 | 0.0000145   | up |
| 1234 | A_33_P3388067 | ZNF735      | 2.138701542 | 0.000734715 | up |
| 1235 | A_24_P253723  | C17orf91    | 2.138610374 | 0.00000318  | up |
| 1236 | A_23_P51397   | ENAH        | 2.138336301 | 0.0000048   | up |
| 1237 | A_33_P3267844 | OR51Q1      | 2.138145849 | 0.038465424 | up |
| 1238 | A_23_P132936  | SPCS3       | 2.137930567 | 0.000028    | up |
| 1239 | A_23_P71241   | SEC61G      | 2.136228393 | 0.000133435 | up |
| 1240 | A_33_P3464555 | LOC283070   | 2.13601217  | 0.0000192   | up |
| 1241 | A_24_P330303  | FRMD6       | 2.135883019 | 0.000000352 | up |
| 1242 | A_33_P3419696 | FGF2        | 2.135072411 | 0.00000065  | up |
| 1243 | A_33_P3340565 | PRSS53      | 2.134896555 | 0.00000113  | up |
| 1244 | A_33_P3436316 | ASXL1       | 2.134796424 | 0.0000072   | up |
| 1245 | A_23_P96209   | REEP4       | 2.13472091  | 0.000252733 | up |
| 1246 | A_33_P3374778 | FLJ36644    | 2.133082847 | 0.001269596 | up |
| 1247 | A_33_P3354137 | MAP4        | 2.131247635 | 0.005512742 | up |
| 1248 | A_23_P1102    | ACTA1       | 2.130654496 | 0.0000341   | up |
| 1249 | A_33_P3302260 | C11orf9     | 2.130625944 | 0.00194067  | up |
| 1250 | A_32_P212897  | LOC643406   | 2.13051666  | 0.0000263   | up |
| 1251 | A_23_P368195  | LSM11       | 2.129761972 | 0.0000284   | up |
| 1252 | A_23_P23029   | BSND        | 2.128525637 | 0.044090799 | up |
| 1253 | A_33_P3357149 | FAM35A      | 2.12817777  | 1.83E-09    | up |
| 1254 | A_23_P4572    | MYL12A      | 2.12771856  | 0.000000768 | up |
| 1255 | A_33_P3364060 | HR          | 2.127145914 | 0.0000188   | up |
| 1256 | A_33_P3303810 | LAD1        | 2.12711446  | 0.000300974 | up |
| 1257 | A_24_P337657  | SRF         | 2.126941323 | 0.001677774 | up |
| 1258 | A_24_P335305  | OAS3        | 2.125709326 | 0.012971881 | up |
| 1259 | A_33_P3260575 | CERCAM      | 2.125703433 | 0.000000466 | up |
| 1260 | A_23_P50907   | ITGAV       | 2.125606434 | 9.66E-08    | up |
| 1261 | A_33_P3381255 | CLEC2A      | 2.124208383 | 0.00000565  | up |
| 1262 | A_33_P3383696 | SPEG        | 2.123137244 | 0.00000892  | up |
| 1263 | A_33_P3255499 | MCART1      | 2.12299499  | 0.00068315  | up |
| 1264 | A_23_P159956  | MID2        | 2.121948977 | 0.000201494 | up |
| 1265 | A_33_P3245163 | MYC         | 2.121751112 | 0.000907268 | up |
| 1266 | A_33_P3209960 | RASGRP2     | 2.121221241 | 0.0000653   | up |
| 1267 | A_32_P300427  | APCDD1L     | 2.120911369 | 7.23E-08    | up |
| 1268 | A_33_P3293009 | NKAIN4      | 2.12059532  | 0.0002225   | up |
| 1269 | A_33_P3214129 | LOC728061   | 2.120536526 | 0.001828875 | up |
| 1270 | A_23_P160849  | FCER1G      | 2.12020324  | 0.000161187 | up |
| 1271 | A_33_P3235132 | LOC400968   | 2.119787136 | 0.0000416   | up |

|      |               |             |             |             |    |
|------|---------------|-------------|-------------|-------------|----|
| 1272 | A_23_P416212  | HSPB9       | 2.119759366 | 0.024482048 | up |
| 1273 | A_33_P3284311 | LOC728660   | 2.119342859 | 0.0000624   | up |
| 1274 | A_33_P3217704 | KIAA1539    | 2.119127953 | 0.0000578   | up |
| 1275 | A_23_P203475  | PRKCDBP     | 2.117461395 | 0.00000117  | up |
| 1276 | A_23_P43800   | BOP1        | 2.116671423 | 0.0000129   | up |
| 1277 | A_23_P49279   | C16orf87    | 2.115617772 | 0.0000296   | up |
| 1278 | A_33_P3219641 | CEP78       | 2.115544012 | 0.00000226  | up |
| 1279 | A_33_P3284646 | FBXL6       | 2.114271525 | 0.0000247   | up |
| 1280 | A_24_P369232  | CCDC3       | 2.114239284 | 0.0000543   | up |
| 1281 | A_24_P169234  | ZAP70       | 2.113993587 | 0.000336979 | up |
| 1282 | A_24_P175909  | MARS        | 2.11367808  | 0.00000027  | up |
| 1283 | A_24_P42389   | OTUD6A      | 2.112832014 | 0.015147514 | up |
| 1284 | A_23_P302060  | IFNE        | 2.112418576 | 0.0000786   | up |
| 1285 | A_33_P3402010 | LOC10050814 | 2.112202762 | 0.0000167   | up |
| 1286 | A_33_P3410206 | C16orf7     | 2.112088031 | 0.000514973 | up |
| 1287 | A_23_P15146   | IL32        | 2.111311821 | 0.00000352  | up |
| 1288 | A_32_P15512   | C1orf194    | 2.110437834 | 0.0000274   | up |
| 1289 | A_33_P3297020 | PSORS1C3    | 2.110350163 | 0.02253017  | up |
| 1290 | A_33_P3249046 | CLDN2       | 2.110284241 | 0.0000171   | up |
| 1291 | A_32_P59678   | C7orf46     | 2.110222807 | 0.000913858 | up |
| 1292 | A_33_P3378284 | COX6B2      | 2.110109939 | 0.006634606 | up |
| 1293 | A_33_P3266132 | GRHL3       | 2.109439192 | 0.003190708 | up |
| 1294 | A_33_P3386467 | RPL23AP7    | 2.109342936 | 0.000013    | up |
| 1295 | A_33_P3370364 | PRLHR       | 2.108306572 | 0.000873385 | up |
| 1296 | A_23_P7099    | AGA         | 2.10818952  | 0.0000273   | up |
| 1297 | A_23_P120863  | GAL3ST1     | 2.107481792 | 0.0000803   | up |
| 1298 | A_32_P81768   | TMEM167A    | 2.106798981 | 5.95E-08    | up |
| 1299 | A_24_P188377  | CD55        | 2.106724019 | 0.00000359  | up |
| 1300 | A_33_P3210379 | SCGB3A1     | 2.105980386 | 0.000250266 | up |
| 1301 | A_23_P356330  | PPPDE2      | 2.105574127 | 0.0000181   | up |
| 1302 | A_33_P3415440 | MAP3K2      | 2.105240907 | 0.0000216   | up |
| 1303 | A_23_P346006  | CCPG1       | 2.104218956 | 0.000000353 | up |
| 1304 | A_23_P257231  | AGXT2L1     | 2.104091971 | 0.032370375 | up |
| 1305 | A_23_P128372  | FKBP4       | 2.103698081 | 0.0000466   | up |
| 1306 | A_33_P3362153 | LOC388564   | 2.102566358 | 0.002638741 | up |
| 1307 | A_23_P28246   | SLC23A3     | 2.102332849 | 0.000684406 | up |
| 1308 | A_23_P47579   | NLRP14      | 2.102210785 | 0.000954818 | up |
| 1309 | A_33_P3363425 | FRMD3       | 2.102001939 | 0.014183922 | up |
| 1310 | A_23_P13364   | NUCB2       | 2.101520845 | 0.00000274  | up |
| 1311 | A_24_P286569  | LANCL2      | 2.101262886 | 0.000431319 | up |
| 1312 | A_24_P359091  | FAM95B1     | 2.099108394 | 0.000072    | up |
| 1313 | A_33_P3249259 | TGM6        | 2.098570601 | 0.000110016 | up |
| 1314 | A_33_P3342260 | GCK         | 2.097862322 | 0.012743353 | up |
| 1315 | A_23_P105028  | ATL3        | 2.097160096 | 0.000116374 | up |
| 1316 | A_33_P3225066 | DNAJC12     | 2.09693833  | 0.00000448  | up |
| 1317 | A_24_P150874  | GNA13       | 2.096762805 | 0.0000042   | up |
| 1318 | A_33_P3373185 | LOC399744   | 2.096549365 | 0.001920813 | up |
| 1319 | A_23_P500130  | KANK1       | 2.095430493 | 0.00000694  | up |
| 1320 | A_23_P382506  | OR1F2P      | 2.095319142 | 0.0000127   | up |
| 1321 | A_23_P30315   | TRIM7       | 2.093989682 | 0.0000484   | up |
| 1322 | A_33_P3390207 | TMEM155     | 2.092972903 | 0.000039    | up |

|      |               |             |             |             |    |
|------|---------------|-------------|-------------|-------------|----|
| 1323 | A_32_P154053  | ATG9B       | 2.092322154 | 0.000557215 | up |
| 1324 | A_24_P379750  | MXD1        | 2.091982089 | 0.000341033 | up |
| 1325 | A_33_P3210622 | ASB13       | 2.091761307 | 0.0000453   | up |
| 1326 | A_33_P3312676 | MYT1        | 2.091214428 | 0.0000167   | up |
| 1327 | A_23_P158725  | SLC16A3     | 2.091033488 | 0.0000166   | up |
| 1328 | A_33_P3313401 | CYCS        | 2.089908964 | 0.00000533  | up |
| 1329 | A_23_P131846  | SNAI1       | 2.089510488 | 0.0000496   | up |
| 1330 | A_33_P3238280 | ESYT3       | 2.087758733 | 0.000873682 | up |
| 1331 | A_32_P126229  | FLJ23152    | 2.08726431  | 0.000423845 | up |
| 1332 | A_33_P3219010 | PPA2        | 2.086193821 | 0.0000188   | up |
| 1333 | A_33_P3386686 | LOC10013287 | 2.08607255  | 0.0000105   | up |
| 1334 | A_23_P403081  | C5orf34     | 2.084732339 | 0.0000795   | up |
| 1335 | A_33_P3247534 | LOC389834   | 2.084602532 | 0.000264421 | up |
| 1336 | A_33_P3235546 | RIMS3       | 2.084489348 | 0.000612194 | up |
| 1337 | A_33_P3632937 | LOC10013126 | 2.084212676 | 0.00000947  | up |
| 1338 | A_23_P132226  | TPST2       | 2.08263743  | 0.000223938 | up |
| 1339 | A_23_P31453   | STEAP1      | 2.082059888 | 0.000265402 | up |
| 1340 | A_33_P3641714 | C19orf66    | 2.082019624 | 0.002614233 | up |
| 1341 | A_24_P80776   | LOC221710   | 2.080656538 | 0.000125707 | up |
| 1342 | A_33_P3236591 | RLTPR       | 2.079647002 | 0.001380903 | up |
| 1343 | A_33_P3413305 | SH3BP5L     | 2.07949392  | 0.0000208   | up |
| 1344 | A_23_P92202   | GMPPB       | 2.079416518 | 0.002174882 | up |
| 1345 | A_23_P430792  | C17orf66    | 2.079284976 | 0.000912879 | up |
| 1346 | A_23_P121480  | CD200       | 2.078238363 | 0.000649007 | up |
| 1347 | A_33_P3396200 | LRCH4       | 2.075392204 | 0.000150883 | up |
| 1348 | A_23_P325562  | SLC1A7      | 2.07515102  | 0.002151403 | up |
| 1349 | A_23_P74943   | KCNH1       | 2.074144874 | 0.0000335   | up |
| 1350 | A_23_P386942  | DIRAS1      | 2.073572274 | 0.0000152   | up |
| 1351 | A_32_P137966  | DEPDC4      | 2.073167381 | 0.000432902 | up |
| 1352 | A_23_P210330  | HSPC159     | 2.072445026 | 0.0000328   | up |
| 1353 | A_33_P3271121 | SH3BP4      | 2.071023131 | 0.0000237   | up |
| 1354 | A_23_P26223   | ASL         | 2.070784369 | 0.000106393 | up |
| 1355 | A_23_P257131  | PEX13       | 2.070726477 | 0.000016    | up |
| 1356 | A_23_P142631  | FKBP1B      | 2.069687711 | 1.47E-08    | up |
| 1357 | A_23_P54736   | GNG13       | 2.069187909 | 0.0000352   | up |
| 1358 | A_24_P879740  | MAP1B       | 2.067528667 | 0.0000296   | up |
| 1359 | A_23_P112162  | DGAT1       | 2.066788603 | 0.0000106   | up |
| 1360 | A_24_P655268  | LOC729082   | 2.066495086 | 0.0000378   | up |
| 1361 | A_23_P254271  | TUBB6       | 2.065792478 | 0.00000443  | up |
| 1362 | A_23_P350698  | ANKFN1      | 2.065774579 | 0.0000119   | up |
| 1363 | A_33_P3872301 | SNAR-C3     | 2.065269615 | 0.00000372  | up |
| 1364 | A_32_P116206  | RELL1       | 2.064133908 | 0.00014045  | up |
| 1365 | A_33_P3354646 | PNLIPRP1    | 2.063945678 | 0.041605099 | up |
| 1366 | A_23_P94494   | TLE4        | 2.062475526 | 0.00000769  | up |
| 1367 | A_33_P3370449 | GOT1L1      | 2.062250138 | 0.00030565  | up |
| 1368 | A_33_P3367106 | C1orf152    | 2.062059555 | 0.000775545 | up |
| 1369 | A_23_P40354   | MAPRE1      | 2.06190448  | 0.00000938  | up |
| 1370 | A_32_P148710  | CFL1        | 2.061573884 | 0.009868488 | up |
| 1371 | A_33_P3233125 | PSD         | 2.061457426 | 0.00038596  | up |
| 1372 | A_23_P67661   | COX7A1      | 2.060897519 | 0.00000674  | up |
| 1373 | A_23_P428729  | ZMYM6       | 2.05929279  | 0.000110871 | up |

|      |               |              |             |             |    |
|------|---------------|--------------|-------------|-------------|----|
| 1374 | A_33_P3215948 | MPZL2        | 2.058482048 | 0.017875664 | up |
| 1375 | A_33_P3351259 | LOC100130561 | 2.057630834 | 0.001089469 | up |
| 1376 | A_33_P3329419 | DNM1         | 2.056896783 | 0.016484535 | up |
| 1377 | A_23_P500464  | COL2A1       | 2.056241906 | 0.001630176 | up |
| 1378 | A_23_P43317   | PRDM12       | 2.056208887 | 0.000363175 | up |
| 1379 | A_23_P303210  | IKBIP        | 2.056086794 | 0.0000352   | up |
| 1380 | A_23_P55251   | ITGA3        | 2.055667029 | 0.007511495 | up |
| 1381 | A_33_P3259253 | CD28         | 2.053712596 | 0.041588132 | up |
| 1382 | A_33_P3360565 | ZNF474       | 2.053444564 | 0.00000583  | up |
| 1383 | A_32_P34920   | FOXD1        | 2.052119863 | 0.00000716  | up |
| 1384 | A_32_P167239  | AFAP1L1      | 2.050808241 | 0.0000481   | up |
| 1385 | A_23_P102890  | MRPS6        | 2.050329863 | 0.00000272  | up |
| 1386 | A_23_P110212  | ACSL1        | 2.049641133 | 0.0000503   | up |
| 1387 | A_23_P64019   | MTMR2        | 2.048362425 | 0.00000273  | up |
| 1388 | A_23_P137814  | ATP6V0B      | 2.048200573 | 0.0000219   | up |
| 1389 | A_33_P3589819 | LOC100507637 | 2.047441172 | 0.000151157 | up |
| 1390 | A_33_P3365134 | PPP1R13B     | 2.046923048 | 0.00000606  | up |
| 1391 | A_24_P289383  | CHD7         | 2.046074486 | 0.001490989 | up |
| 1392 | A_23_P10785   | VTI1A        | 2.045527595 | 0.00000814  | up |
| 1393 | A_24_P322709  | SNTA1        | 2.045433263 | 0.017356242 | up |
| 1394 | A_33_P3273552 | KRT83        | 2.045318473 | 0.008784722 | up |
| 1395 | A_23_P357374  | PTH2         | 2.045111262 | 0.00000271  | up |
| 1396 | A_23_P166269  | FAM3B        | 2.044538174 | 0.000377956 | up |
| 1397 | A_33_P3283122 | WWC2         | 2.044408744 | 0.0000845   | up |
| 1398 | A_33_P3469673 | LOC284576    | 2.0437059   | 0.03819097  | up |
| 1399 | A_33_P3474250 | LOC283270    | 2.042853386 | 0.000354123 | up |
| 1400 | A_24_P15043   | KLHL18       | 2.041845208 | 0.0000115   | up |
| 1401 | A_33_P3538688 | HIST2H4A     | 2.041511225 | 0.000185668 | up |
| 1402 | A_23_P54846   | HERPUD1      | 2.041087692 | 0.00000494  | up |
| 1403 | A_23_P207537  | DUSP14       | 2.040738886 | 0.00000198  | up |
| 1404 | A_23_P141770  | NAPG         | 2.039246251 | 0.00000199  | up |
| 1405 | A_23_P206359  | CDH1         | 2.039238477 | 0.00000264  | up |
| 1406 | A_33_P3379922 | PROC         | 2.038682532 | 0.00017601  | up |
| 1407 | A_23_P62907   | ATF6         | 2.038166154 | 0.0000373   | up |
| 1408 | A_23_P130488  | ERCC2        | 2.038150896 | 0.000751984 | up |
| 1409 | A_23_P62115   | TIMP1        | 2.036163389 | 7.11E-08    | up |
| 1410 | A_24_P402438  | TGFB2        | 2.035481346 | 0.0000191   | up |
| 1411 | A_23_P393727  | NRP2         | 2.033913983 | 0.000315894 | up |
| 1412 | A_24_P252497  | TRIB1        | 2.03328155  | 0.00010543  | up |
| 1413 | A_24_P93206   | TMEM179      | 2.03304667  | 0.011548754 | up |
| 1414 | A_33_P3526458 | LOC338579    | 2.032861791 | 0.001679891 | up |
| 1415 | A_23_P334798  | LRRC2        | 2.032351583 | 0.0000108   | up |
| 1416 | A_33_P3275835 | TOR2A        | 2.032260018 | 0.0000776   | up |
| 1417 | A_24_P192994  | FADS1        | 2.031737709 | 0.00000299  | up |
| 1418 | A_33_P3270317 | SLC18A3      | 2.031442693 | 0.046245605 | up |
| 1419 | A_24_P911288  | HPX-2        | 2.031326294 | 0.000300827 | up |
| 1420 | A_33_P3350643 | LMX1B        | 2.030842044 | 0.000355042 | up |
| 1421 | A_23_P60227   | CCIN         | 2.0305161   | 0.00000329  | up |
| 1422 | A_23_P36562   | ITGA5        | 2.030202076 | 0.004884296 | up |
| 1423 | A_32_P84009   | CMTM4        | 2.02976682  | 0.0000923   | up |
| 1424 | A_33_P3270451 | TXNDC5       | 2.029611314 | 0.000027    | up |

|      |               |              |             |             |    |
|------|---------------|--------------|-------------|-------------|----|
| 1425 | A_32_P62276   | LOC100507201 | 2.029486861 | 0.02166201  | up |
| 1426 | A_23_P202565  | SHOC2        | 2.029370528 | 0.000125509 | up |
| 1427 | A_23_P139143  | STX3         | 2.028913651 | 0.000097    | up |
| 1428 | A_23_P116902  | ART4         | 2.028776351 | 0.002268405 | up |
| 1429 | A_23_P204947  | GJB2         | 2.02873482  | 0.00150187  | up |
| 1430 | A_33_P3325467 | C1orf212     | 2.028653777 | 0.000246018 | up |
| 1431 | A_24_P921366  | CALD1        | 2.028309907 | 0.00000358  | up |
| 1432 | A_33_P3353170 | CLTC         | 2.02818605  | 0.00000157  | up |
| 1433 | A_33_P3269423 | C13orf35     | 2.02758866  | 0.000142307 | up |
| 1434 | A_23_P251151  | NELL1        | 2.026730131 | 0.000772872 | up |
| 1435 | A_33_P3223923 | PDIA3        | 2.025931694 | 0.0000357   | up |
| 1436 | A_24_P169073  | FAM131C      | 2.0254119   | 0.001137091 | up |
| 1437 | A_33_P3375413 | LOC100131711 | 2.025382278 | 0.000597374 | up |
| 1438 | A_23_P23356   | RRP15        | 2.025365338 | 0.0000314   | up |
| 1439 | A_32_P226186  | KIAA1549     | 2.025176058 | 0.000114453 | up |
| 1440 | A_23_P983     | PRDX6        | 2.025076862 | 0.0000271   | up |
| 1441 | A_24_P264909  | NDFIP2       | 2.025067832 | 0.00000202  | up |
| 1442 | A_33_P3260100 | CCDC167      | 2.024599668 | 0.0000037   | up |
| 1443 | A_24_P364296  | STX2         | 2.023687699 | 0.00000382  | up |
| 1444 | A_33_P3330125 | DIABLO       | 2.022774038 | 0.002179574 | up |
| 1445 | A_33_P3544887 | TTC28        | 2.021713175 | 0.019861203 | up |
| 1446 | A_33_P3369631 | EIF3J        | 2.021646192 | 0.0000314   | up |
| 1447 | A_23_P109026  | KCNK15       | 2.021380616 | 0.000489734 | up |
| 1448 | A_24_P141736  | METAP2       | 2.0213596   | 0.000105388 | up |
| 1449 | A_33_P3356255 | ANXA11       | 2.020395406 | 0.021745908 | up |
| 1450 | A_24_P374427  | ZDHHC21      | 2.019657747 | 0.000000912 | up |
| 1451 | A_33_P3368301 | BOLA3        | 2.018828465 | 0.0000782   | up |
| 1452 | A_33_P3240996 | LOC100134241 | 2.017801607 | 0.000267478 | up |
| 1453 | A_33_P3238215 | COBLL1       | 2.017683192 | 0.000202935 | up |
| 1454 | A_32_P44568   | LDHA         | 2.017162439 | 0.0000402   | up |
| 1455 | A_23_P60210   | RLN1         | 2.017137831 | 0.009213974 | up |
| 1456 | A_23_P53763   | C13orf18     | 2.016967447 | 0.000984902 | up |
| 1457 | A_33_P3327663 | SUSD4        | 2.016388782 | 0.000590375 | up |
| 1458 | A_33_P3323048 | SLC10A7      | 2.016261367 | 0.0000771   | up |
| 1459 | A_24_P294832  | PTP4A1       | 2.015292621 | 0.0000456   | up |
| 1460 | A_33_P3260134 | NTRK3        | 2.015207179 | 0.002994341 | up |
| 1461 | A_33_P3422888 | CLEC16A      | 2.014890122 | 0.00000705  | up |
| 1462 | A_23_P75630   | APOA5        | 2.014785612 | 0.000590809 | up |
| 1463 | A_24_P256155  | NKX1-2       | 2.014539602 | 0.0000593   | up |
| 1464 | A_23_P51679   | MEF2D        | 2.013906912 | 0.000172287 | up |
| 1465 | A_23_P149649  | SDHB         | 2.013449284 | 0.00000357  | up |
| 1466 | A_23_P144916  | GFPT2        | 2.012673285 | 0.00000999  | up |
| 1467 | A_33_P3260969 | PRAP1        | 2.012368018 | 0.0000783   | up |
| 1468 | A_32_P62963   | KRT16P2      | 2.01177208  | 0.017063964 | up |
| 1469 | A_23_P128201  | NCKAP1L      | 2.007790072 | 0.0000181   | up |
| 1470 | A_33_P3328251 | LOC100288011 | 2.007705041 | 0.048182803 | up |
| 1471 | A_33_P3210343 | ETV6         | 2.007397977 | 0.000000149 | up |
| 1472 | A_33_P3214943 | SPOCK2       | 2.007192382 | 0.0000108   | up |
| 1473 | A_24_P108451  | GPI          | 2.007032066 | 0.0000457   | up |
| 1474 | A_23_P360240  | MYEOV        | 2.006731596 | 0.032498456 | up |
| 1475 | A_23_P47116   | RASSF7       | 2.006132645 | 0.033488359 | up |

|      |               |             |             |             |    |
|------|---------------|-------------|-------------|-------------|----|
| 1476 | A_23_P68669   | CHODL       | 2.005298492 | 0.000255085 | up |
| 1477 | A_33_P3251896 | APBB2       | 2.00425212  | 0.00000167  | up |
| 1478 | A_23_P27528   | CYP2A7      | 2.002830041 | 0.000490996 | up |
| 1479 | A_33_P3229002 | C17orf50    | 2.001937499 | 0.049786975 | up |
| 1480 | A_23_P200222  | LRP8        | 2.001325737 | 0.000544384 | up |
| 1481 | A_33_P3360972 | EXOC3L4     | 2.000861999 | 0.0000778   | up |
| 1482 | A_33_P3254756 | LOC550112   | 2.000598969 | 0.000329906 | up |
| 1483 | A_33_P3247624 | REP15       | 2.000399986 | 0.0000158   | up |
| 1484 | A_33_P3222892 | SLC10A3     | 15.3200684  | 0.0000162   | up |
| 1485 | A_32_P48466   | LCA5L       | 11.65759407 | 0.0006526   | up |
| 1486 | A_33_P3422654 | LOC10013398 | 10.99706223 | 0.002281103 | up |
| 1487 | A_33_P3402868 | GRIN2D      | 9.887128847 | 0.0000248   | up |
| 1488 | A_23_P10206   | HAS2        | 9.661669704 | 0.000241089 | up |
| 1489 | A_33_P3260373 | ISY1-RAB43  | 9.653374619 | 0.00000978  | up |
| 1490 | A_32_P225345  | C11orf88    | 9.200954289 | 0.001725937 | up |
| 1491 | A_23_P390704  | STK38       | 8.112231369 | 0.001930079 | up |
| 1492 | A_33_P3760937 | LOC497256   | 7.755348073 | 0.0000592   | up |
| 1493 | A_23_P50052   | C18orf12    | 7.137624474 | 0.002293227 | up |
| 1494 | A_23_P29365   | RYBP        | 6.734244802 | 0.0000702   | up |
| 1495 | A_24_P307808  | KCTD16      | 6.27486636  | 0.0000723   | up |
| 1496 | A_24_P225604  | DNAJC10     | 6.266268116 | 0.000000512 | up |
| 1497 | A_33_P3229452 | FLJ44477    | 6.002900826 | 0.0000261   | up |
| 1498 | A_23_P8906    | LRP12       | 5.768868988 | 0.00000605  | up |
| 1499 | A_23_P127128  | DNAJC1      | 5.707981531 | 0.000144426 | up |
| 1500 | A_32_P133840  | TMCC2       | 5.663606504 | 0.003274473 | up |
| 1501 | A_33_P3410454 | GTF2IRD2B   | 5.548840883 | 0.008859007 | up |
| 1502 | A_33_P3338166 | NUAK2       | 5.359887674 | 0.001533241 | up |
| 1503 | A_23_P319640  | LOC151534   | 5.313741944 | 0.00027124  | up |
| 1504 | A_23_P66739   | SLC13A5     | 5.299191143 | 0.000614457 | up |
| 1505 | A_23_P11279   | ALG13       | 5.275033783 | 0.0000443   | up |
| 1506 | A_23_P171117  | MORC4       | 5.265659864 | 0.000000438 | up |
| 1507 | A_33_P3357247 | USP36       | 5.168034138 | 0.0000461   | up |
| 1508 | A_33_P3245489 | ADAMTSL5    | 5.09112669  | 0.000734087 | up |
| 1509 | A_33_P3390868 | SYNPO2      | 4.999025894 | 0.0000716   | up |
| 1510 | A_33_P3355599 | PCDHB7      | 4.925893717 | 0.000247638 | up |
| 1511 | A_23_P102694  | DEFB129     | 4.881420381 | 0.000588147 | up |
| 1512 | A_23_P36226   | SLC25A33    | 4.838286831 | 0.000141002 | up |
| 1513 | A_33_P3341970 | NEGR1       | 4.631285406 | 0.001163025 | up |
| 1514 | A_24_P203953  | LOC439951   | 4.433715707 | 0.000332714 | up |
| 1515 | A_23_P58763   | PELO        | 4.367473855 | 0.0000684   | up |
| 1516 | A_24_P400172  | LOC10013069 | 4.361439165 | 0.001279419 | up |
| 1517 | A_24_P322771  | TFF1        | 4.327851708 | 0.000374023 | up |
| 1518 | A_24_P355493  | LHPP        | 4.320318978 | 0.00000704  | up |
| 1519 | A_33_P3234490 | BOLA2B      | 4.232007155 | 0.000408078 | up |
| 1520 | A_33_P3247252 | LOC729549   | 4.186852808 | 0.006023574 | up |
| 1521 | A_23_P28590   | FASTKD1     | 4.120286527 | 0.0000483   | up |
| 1522 | A_33_P3353263 | CYB5RL      | 3.91182591  | 0.00000147  | up |
| 1523 | A_33_P3223182 | TPTE2P3     | 3.84427533  | 0.000181142 | up |
| 1524 | A_24_P250227  | NR1D1       | 3.832732648 | 0.004957389 | up |
| 1525 | A_23_P204702  | TMBIM6      | 3.818858328 | 0.0000973   | up |
| 1526 | A_23_P366394  | ZAK         | 3.783089829 | 0.000322088 | up |

|      |               |              |             |             |    |
|------|---------------|--------------|-------------|-------------|----|
| 1527 | A_33_P3317589 | GFRA4        | 3.747194682 | 0.044473465 | up |
| 1528 | A_33_P3317253 | PTER         | 3.715679674 | 0.000002    | up |
| 1529 | A_33_P3244141 | NDEL1        | 3.675262256 | 0.0000159   | up |
| 1530 | A_32_P215318  | ACACA        | 3.659644895 | 0.013232305 | up |
| 1531 | A_33_P3214466 | MESP1        | 3.600097636 | 0.00029431  | up |
| 1532 | A_23_P83976   | CEP112       | 3.597688636 | 0.00034635  | up |
| 1533 | A_23_P30283   | FAM174A      | 3.595996625 | 0.00000489  | up |
| 1534 | A_23_P139919  | CHST11       | 3.567115921 | 0.00000676  | up |
| 1535 | A_33_P3358938 | CLOCK        | 3.476527175 | 0.000000126 | up |
| 1536 | A_24_P319942  | SSR3         | 3.449104086 | 0.000392001 | up |
| 1537 | A_23_P154875  | BACE2        | 3.436726394 | 0.0000263   | up |
| 1538 | A_24_P211709  | XPNPEP2      | 3.433579815 | 0.000707695 | up |
| 1539 | A_23_P307310  | ACAN         | 3.352733938 | 0.000248613 | up |
| 1540 | A_23_P78108   | ALDOC        | 3.34122306  | 0.00000604  | up |
| 1541 | A_24_P23995   | RNF187       | 3.338680024 | 0.0000312   | up |
| 1542 | A_33_P3335386 | FAM83G       | 3.331182435 | 0.0000737   | up |
| 1543 | A_23_P333951  | DNAH14       | 3.290590499 | 0.0000154   | up |
| 1544 | A_24_P11061   | CSAG1        | 3.285020712 | 0.000182073 | up |
| 1545 | A_23_P111995  | LOXL2        | 3.282683972 | 0.00000302  | up |
| 1546 | A_33_P3223495 | FRY          | 3.26820361  | 0.0000894   | up |
| 1547 | A_23_P404091  | GRPEL2       | 3.25256187  | 0.0000554   | up |
| 1548 | A_23_P65518   | DACT1        | 3.172910367 | 0.0000151   | up |
| 1549 | A_24_P252364  | NRCAM        | 3.169352953 | 0.000046    | up |
| 1550 | A_33_P3333992 | LOC100132491 | 3.139096399 | 0.006083723 | up |
| 1551 | A_24_P365515  | FOXA2        | 3.121455936 | 0.001253567 | up |
| 1552 | A_33_P3285911 | KIAA1919     | 3.117042588 | 0.000116704 | up |
| 1553 | A_33_P3802116 | LOC157860    | 3.0966128   | 0.000688193 | up |
| 1554 | A_33_P3218120 | LOC402036    | 3.089953798 | 0.000144762 | up |
| 1555 | A_23_P425750  | ARMC6        | 3.028270333 | 0.014583663 | up |
| 1556 | A_23_P165668  | SLC35F5      | 2.974000864 | 0.0000358   | up |
| 1557 | A_23_P153524  | C19orf73     | 2.96491662  | 0.0000286   | up |
| 1558 | A_32_P75284   | KATNAL1      | 2.959513833 | 0.0000978   | up |
| 1559 | A_33_P3377514 | HOXA1        | 2.937494872 | 0.00000857  | up |
| 1560 | A_32_P191441  | C10orf90     | 2.935723103 | 0.003295066 | up |
| 1561 | A_24_P721699  | A1BG-AS1     | 2.922335196 | 0.00000288  | up |
| 1562 | A_33_P3279124 | FAM21C       | 2.917606125 | 0.005102555 | up |
| 1563 | A_23_P112798  | CRIP2        | 2.913050543 | 0.028916468 | up |
| 1564 | A_33_P3268310 | LIMS3L       | 2.879048049 | 0.000412694 | up |
| 1565 | A_33_P3407925 | VMP1         | 2.872357192 | 0.0000811   | up |
| 1566 | A_33_P3216292 | TBC1D2       | 2.867169575 | 0.000588778 | up |
| 1567 | A_23_P19182   | REEP2        | 2.854286329 | 0.0000486   | up |
| 1568 | A_33_P3249768 | DGKK         | 2.847848369 | 0.000934838 | up |
| 1569 | A_23_P417415  | ACOT11       | 2.847351233 | 0.00000219  | up |
| 1570 | A_24_P74559   | CYTH4        | 2.824234012 | 0.0000854   | up |
| 1571 | A_23_P126727  | NOL9         | 2.785972467 | 0.00046031  | up |
| 1572 | A_23_P41114   | CSTA         | 2.748773881 | 0.0000296   | up |
| 1573 | A_33_P3262575 | BAIAP2L1     | 2.730297577 | 0.000066    | up |
| 1574 | A_23_P70307   | SMOC2        | 2.716489242 | 0.001893036 | up |
| 1575 | A_23_P68219   | TTN          | 2.703400766 | 0.004576022 | up |
| 1576 | A_23_P385081  | SCAMP2       | 2.691511644 | 0.0000505   | up |
| 1577 | A_33_P3236858 | TGFB111      | 2.685005419 | 0.0000178   | up |



|      |               |             |             |             |    |
|------|---------------|-------------|-------------|-------------|----|
| 1578 | A_24_P358328  | TPI1P2      | 2.672501393 | 0.0000076   | up |
| 1579 | A_33_P3344991 | TBC1D3      | 2.659052939 | 0.0000441   | up |
| 1580 | A_33_P3344574 | SFTPA2      | 2.656708977 | 0.00000828  | up |
| 1581 | A_33_P3216438 | SPATA21     | 2.65607245  | 0.002502028 | up |
| 1582 | A_23_P148273  | MAGT1       | 2.655241408 | 0.0000014   | up |
| 1583 | A_23_P385063  | DNAJB6      | 2.620031215 | 0.000193019 | up |
| 1584 | A_23_P209183  | GLT25D1     | 2.60627262  | 0.000602844 | up |
| 1585 | A_23_P209320  | PER2        | 2.599036389 | 0.00000825  | up |
| 1586 | A_33_P3415698 | TMIGD2      | 2.596641359 | 0.00000224  | up |
| 1587 | A_33_P3394405 | LOC727721   | 2.588410318 | 0.00000486  | up |
| 1588 | A_23_P6771    | LMCD1       | 2.580921628 | 0.0000843   | up |
| 1589 | A_23_P35205   | RCAN3       | 2.551513603 | 0.00000946  | up |
| 1590 | A_23_P26976   | CHAD        | 2.544690739 | 0.000593717 | up |
| 1591 | A_33_P3255964 | CYMP        | 2.542598503 | 0.011528754 | up |
| 1592 | A_23_P71790   | MAMDC4      | 2.541648162 | 0.0000911   | up |
| 1593 | A_23_P147918  | S100A16     | 2.536129182 | 0.0000147   | up |
| 1594 | A_33_P3365117 | AKR1C1      | 2.533233974 | 0.0000555   | up |
| 1595 | A_33_P3240258 | RPN2        | 2.532710008 | 0.00000119  | up |
| 1596 | A_32_P192970  | ALDH4A1     | 2.52736652  | 0.000000589 | up |
| 1597 | A_33_P3391796 | NOG         | 2.515281379 | 0.002417001 | up |
| 1598 | A_23_P115223  | HAX1        | 2.506572448 | 0.0000597   | up |
| 1599 | A_33_P3261433 | LOC10013147 | 2.485294184 | 0.000777441 | up |
| 1600 | A_33_P3390357 | SPIRE1      | 2.470287345 | 0.0000813   | up |
| 1601 | A_33_P3326553 | TMEM82      | 2.458331433 | 0.000920559 | up |
| 1602 | A_33_P3233871 | F12         | 2.456070149 | 0.000000381 | up |
| 1603 | A_23_P132956  | UCHL1       | 2.413472408 | 0.000927503 | up |
| 1604 | A_33_P3248213 | CSNK1A1P1   | 2.409730488 | 0.000486425 | up |
| 1605 | A_23_P76622   | DCT         | 2.407243363 | 0.002297527 | up |
| 1606 | A_23_P128613  | KDELC1      | 2.405188557 | 0.000039    | up |
| 1607 | A_33_P3661631 | PCBD2       | 2.38489624  | 0.000155658 | up |
| 1608 | A_33_P3370555 | GALC        | 2.383787554 | 0.000071    | up |
| 1609 | A_33_P3378360 | PRELID1     | 2.376926732 | 0.0000492   | up |
| 1610 | A_33_P3364205 | SBDSP1      | 2.370974259 | 0.0000547   | up |
| 1611 | A_33_P3268686 | FBXW12      | 2.362025926 | 0.000368576 | up |
| 1612 | A_33_P3397486 | ENTPD4      | 2.351133023 | 0.000000596 | up |
| 1613 | A_24_P105564  | PRKAB2      | 2.346691182 | 0.0000301   | up |
| 1614 | A_33_P3333527 | MSTO1       | 2.335146398 | 0.0000455   | up |
| 1615 | A_24_P12136   | S100Z       | 2.330468803 | 0.033097561 | up |
| 1616 | A_23_P138125  | FAIM3       | 2.328566903 | 0.01876136  | up |
| 1617 | A_33_P3401658 | PSG2        | 2.326515824 | 0.000297492 | up |
| 1618 | A_23_P127175  | SAR1A       | 2.320879575 | 0.0000502   | up |
| 1619 | A_33_P3239087 | FAM87B      | 2.315082597 | 0.000278468 | up |
| 1620 | A_32_P181638  | BVES        | 2.307532552 | 0.0000657   | up |
| 1621 | A_33_P3374289 | C10orf82    | 2.306101267 | 0.000133901 | up |
| 1622 | A_33_P3414242 | MOG         | 2.299042549 | 0.001131352 | up |
| 1623 | A_23_P64792   | KCNMB4      | 2.295137202 | 0.0000191   | up |
| 1624 | A_23_P416142  | DLG1        | 2.294473588 | 0.000328986 | up |
| 1625 | A_23_P215517  | KLHL7       | 2.289087695 | 0.00000186  | up |
| 1626 | A_33_P3358312 | OTUD6B      | 2.285919079 | 0.000000954 | up |
| 1627 | A_23_P410965  | KIAA1522    | 2.282982815 | 0.000000138 | up |
| 1628 | A_24_P383762  | RASGEF1C    | 2.270896834 | 0.018247718 | up |

|      |               |              |             |             |    |
|------|---------------|--------------|-------------|-------------|----|
| 1629 | A_33_P3382281 | C20orf94     | 2.25033814  | 0.0000982   | up |
| 1630 | A_33_P3318646 | CALY         | 2.248052456 | 0.000294526 | up |
| 1631 | A_23_P124108  | ITGAM        | 2.246850862 | 0.000593845 | up |
| 1632 | A_23_P89902   | RTN2         | 2.241711934 | 0.000653889 | up |
| 1633 | A_23_P357929  | SLC35D1      | 2.24000792  | 0.0000468   | up |
| 1634 | A_24_P151692  | POF1B        | 2.235236782 | 0.001225553 | up |
| 1635 | A_23_P409438  | IL28A        | 2.223265124 | 0.000659354 | up |
| 1636 | A_33_P3222439 | TCP10L2      | 2.219210215 | 0.002188778 | up |
| 1637 | A_23_P4400    | KRTAP4-11    | 2.216620153 | 0.02665422  | up |
| 1638 | A_24_P256654  | LOC401588    | 2.212923022 | 0.000266348 | up |
| 1639 | A_33_P3424132 | LOC158376    | 2.207430629 | 0.0000895   | up |
| 1640 | A_23_P16110   | OR7E24       | 2.207121626 | 0.0000321   | up |
| 1641 | A_33_P3402615 | SLC6A9       | 2.194062313 | 0.0000805   | up |
| 1642 | A_23_P402787  | FAM100A      | 2.189870666 | 0.000238856 | up |
| 1643 | A_24_P167614  | INTS6        | 2.188037807 | 0.0000129   | up |
| 1644 | A_33_P3214481 | P4HA1        | 2.18732081  | 0.000062    | up |
| 1645 | A_23_P207967  | CTIF         | 2.17602279  | 0.002237255 | up |
| 1646 | A_23_P147786  | RIMS2        | 2.170991684 | 0.0000297   | up |
| 1647 | A_33_P3400152 | LOC728558    | 2.1631143   | 0.006893537 | up |
| 1648 | A_24_P347880  | ALOXE3       | 2.161529711 | 0.000436703 | up |
| 1649 | A_23_P38677   | SLMO1        | 2.154887172 | 0.00000585  | up |
| 1650 | A_33_P3313920 | KIR2DL2      | 2.149333319 | 0.002171149 | up |
| 1651 | A_23_P45751   | CLCA4        | 2.14242287  | 0.000034    | up |
| 1652 | A_33_P3247082 | SLC6A10P     | 2.141549959 | 0.00000346  | up |
| 1653 | A_23_P2181    | CYB5R2       | 2.139509423 | 0.001111391 | up |
| 1654 | A_33_P3401980 | SPRED3       | 2.123347798 | 0.029933658 | up |
| 1655 | A_33_P3298617 | LOC100508991 | 2.123270089 | 0.007560348 | up |
| 1656 | A_33_P3240507 | KCTD12       | 2.119257217 | 0.00005     | up |
| 1657 | A_33_P3384432 | TFDP2        | 2.117855757 | 0.0000795   | up |
| 1658 | A_23_P47226   | YIF1A        | 2.103183895 | 0.000000434 | up |
| 1659 | A_33_P3257030 | LEPREL4      | 2.101532353 | 0.0000557   | up |
| 1660 | A_33_P3235117 | LOC100133281 | 2.099246138 | 0.0000645   | up |
| 1661 | A_23_P212089  | NFKBIZ       | 2.096594221 | 0.001222551 | up |
| 1662 | A_24_P36745   | CXorf38      | 2.094540867 | 0.000561612 | up |
| 1663 | A_23_P307536  | SH3D21       | 2.088364925 | 0.00101766  | up |
| 1664 | A_23_P14165   | GPR18        | 2.087007811 | 0.008525128 | up |
| 1665 | A_24_P407930  | SEH1L        | 2.081313997 | 0.0000106   | up |
| 1666 | A_23_P167479  | IL17B        | 2.074725302 | 0.006215444 | up |
| 1667 | A_33_P3365524 | SETD3        | 2.069926107 | 0.0000403   | up |
| 1668 | A_23_P252471  | PECAM1       | 2.067829211 | 0.037373549 | up |
| 1669 | A_23_P145357  | BAK1         | 2.065626384 | 0.0000527   | up |
| 1670 | A_33_P3292844 | NEUROG3      | 2.063503044 | 0.04405845  | up |
| 1671 | A_23_P257649  | RBP1         | 2.062820088 | 0.001098894 | up |
| 1672 | A_23_P419107  | TCP11L2      | 2.061113187 | 0.000190964 | up |
| 1673 | A_33_P3291776 | NANS         | 2.055258129 | 0.00000523  | up |
| 1674 | A_33_P3222630 | FBXO43       | 2.045708616 | 0.017135732 | up |
| 1675 | A_32_P439662  | DNAH17       | 2.04529319  | 0.003736002 | up |
| 1676 | A_33_P3331882 | CRTC1        | 2.042195619 | 0.000171836 | up |
| 1677 | A_23_P405282  | MGC45922     | 2.03539011  | 0.000837663 | up |
| 1678 | A_23_P259272  | WSB2         | 2.024028634 | 0.000241597 | up |
| 1679 | A_33_P3340525 | SYT10        | 2.018426053 | 0.000169916 | up |

|      |               |              |             |             |    |
|------|---------------|--------------|-------------|-------------|----|
| 1680 | A_23_P257256  | GRK6         | 2.0147102   | 0.0000379   | up |
| 1681 | A_33_P3519683 | ZBTB8OS      | 2.013890161 | 0.000147096 | up |
| 1682 | A_33_P3423954 | CBX2         | 2.011179245 | 0.0154933   | up |
| 1683 | A_33_P3368830 | LY9          | 2.010700634 | 0.0000837   | up |
| 1684 | A_33_P3322388 | SPRR2D       | 2.01061706  | 0.000184052 | up |
| 1685 | A_23_P32414   | MST4         | 2.044787232 | 0.000317552 | up |
| 1686 | A_24_P205589  | ACOT7        | 2.044538174 | 0.000804482 | up |
| 1687 | A_33_P3247599 | ZNF805       | 2.044408744 | 0.00000417  | up |
| 1688 | A_23_P204144  | KRT85        | 2.043982248 | 0.042630581 | up |
| 1689 | A_33_P3290955 | KIAA1875     | 2.0437059   | 0.01038533  | up |
| 1690 | A_23_P17955   | FBXL2        | 2.042853386 | 0.0000364   | up |
| 1691 | A_33_P3522525 | GRPEL1       | 2.041845208 | 0.0000852   | up |
| 1692 | A_24_P37887   | GPR150       | 2.041511225 | 0.000560335 | up |
| 1693 | A_23_P350754  | OR7E13P      | 2.041087692 | 0.0000526   | up |
| 1694 | A_23_P101054  | KRT34        | 2.040738886 | 0.001671144 | up |
| 1695 | A_23_P6535    | KLHDC7B      | 2.039246251 | 0.018541281 | up |
| 1696 | A_24_P332623  | CTAGE11P     | 2.039238477 | 0.000277835 | up |
| 1697 | A_24_P916718  | ZNF467       | 2.038682532 | 0.000297856 | up |
| 1698 | A_23_P8640    | GPER         | 2.038166154 | 0.000173033 | up |
| 1699 | A_23_P363313  | SLC16A11     | 2.038150896 | 0.001917808 | up |
| 1700 | A_33_P3274696 | GPR172A      | 2.036163389 | 0.00000101  | up |
| 1701 | A_33_P3243337 | C19orf10     | 2.035481346 | 0.0000292   | up |
| 1702 | A_24_P59607   | C17orf51     | 2.033913983 | 0.00000298  | up |
| 1703 | A_33_P3371089 | SGTB         | 2.03328155  | 0.000000605 | up |
| 1704 | A_23_P313728  | FAM98A       | 2.032351583 | 0.000159238 | up |
| 1705 | A_23_P137391  | ENO1         | 2.032260018 | 0.0000146   | up |
| 1706 | A_23_P218505  | LHB          | 2.031737709 | 0.0000041   | up |
| 1707 | A_23_P45294   | FAM199X      | 2.031442693 | 0.0000523   | up |
| 1708 | A_33_P3273409 | SLC35E1      | 2.031326294 | 1.45E-09    | up |
| 1709 | A_23_P160537  | C1orf135     | 2.0305161   | 0.0010904   | up |
| 1710 | A_33_P3571120 | AP3D1        | 2.030202076 | 0.000275921 | up |
| 1711 | A_24_P392110  | PSG8         | 2.02976682  | 0.000173581 | up |
| 1712 | A_24_P24685   | HMGB3P22     | 2.029611314 | 0.002024304 | up |
| 1713 | A_33_P3210848 | ELFN1        | 2.029486861 | 0.000684836 | up |
| 1714 | A_24_P153568  | MPEG1        | 2.029370528 | 0.009104548 | up |
| 1715 | A_23_P115838  | C10orf12     | 2.028913651 | 6.02E-08    | up |
| 1716 | A_23_P78526   | CEACAM19     | 2.028776351 | 0.000238449 | up |
| 1717 | A_23_P97632   | EPRS         | 2.028653777 | 0.0000354   | up |
| 1718 | A_33_P3351617 | MYO3A        | 2.028309907 | 0.003199944 | up |
| 1719 | A_23_P71904   | METTLL11A    | 2.02758866  | 0.000144578 | up |
| 1720 | A_33_P3416568 | AIG1         | 2.026730131 | 0.000735527 | up |
| 1721 | A_33_P3373745 | BRD4         | 2.025931694 | 0.000173276 | up |
| 1722 | A_23_P21673   | KIAA1797     | 2.0254119   | 0.000134885 | up |
| 1723 | A_23_P302038  | POU4F2       | 2.025382278 | 0.001774337 | up |
| 1724 | A_33_P3388938 | MGC23284     | 2.025365338 | 0.000266718 | up |
| 1725 | A_23_P20832   | SPTAN1       | 2.025176058 | 0.005102233 | up |
| 1726 | A_33_P3867461 | DKFZp686O132 | 2.025076862 | 0.004615798 | up |
| 1727 | A_23_P405878  | C12orf54     | 2.025067832 | 0.0000516   | up |
| 1728 | A_33_P3594214 | OR7E104P     | 2.023687699 | 0.00000119  | up |
| 1729 | A_24_P388810  | SRP19        | 2.022774038 | 0.00000361  | up |
| 1730 | A_33_P3385436 | PLAC8L1      | 2.021887743 | 0.000412352 | up |

|      |               |              |             |             |      |
|------|---------------|--------------|-------------|-------------|------|
| 1731 | A_33_P3417086 | NIPAL1       | 2.021713175 | 0.028471453 | up   |
| 1732 | A_33_P3316770 | SLCO1A2      | 2.021646192 | 0.0000795   | up   |
| 1733 | A_23_P54991   | DYNLL2       | 2.021380616 | 0.0000281   | up   |
| 1734 | A_23_P98085   | PTEN         | 2.0213596   | 0.0000293   | up   |
| 1735 | A_24_P372134  | TMEM140      | 2.020395406 | 0.000216277 | up   |
| 1736 | A_23_P88351   | ATL1         | 2.019657747 | 0.00014131  | up   |
| 1737 | A_23_P132915  | FAM114A1     | 2.019233383 | 0.0000288   | up   |
| 1738 | A_23_P258814  | DPH3P1       | 2.018828465 | 6.27E-09    | up   |
| 1739 | A_23_P147025  | RAB33A       | 2.017801607 | 0.000109167 | up   |
| 1740 | A_23_P57379   | CDC45        | 2.017683192 | 0.000000462 | up   |
| 1741 | A_24_P930111  | SLC4A10      | 2.017162439 | 0.003940932 | up   |
| 1742 | A_33_P3264188 | OR2D3        | 2.016967447 | 0.008348136 | up   |
| 1743 | A_32_P46840   | LOC729680    | 2.016388782 | 0.000236912 | up   |
| 1744 | A_33_P3381235 | LOC100127888 | 2.016261367 | 0.00000128  | up   |
| 1745 | A_23_P379327  | FAM63B       | 2.015292621 | 0.00000195  | up   |
| 1746 | A_23_P82286   | ZAN          | 2.015207179 | 0.001834332 | up   |
| 1747 | A_33_P3279379 | DSTNP2       | 2.014890122 | 0.0000531   | up   |
| 1748 | A_33_P3226557 | PRR23B       | 2.014785612 | 0.00000195  | up   |
| 1749 | A_23_P47857   | TM7SF3       | 2.014539602 | 0.00000821  | up   |
| 1750 | A_23_P330616  | WIPF1        | 2.013906912 | 0.005777198 | up   |
| 1751 | A_33_P3418091 | ISLR2        | 2.013449284 | 0.035418029 | up   |
| 1752 | A_23_P130194  | PYCR1        | 2.012368018 | 0.0000387   | up   |
| 1753 | A_33_P3389342 | ARID5A       | 2.011772208 | 0.0000698   | up   |
| 1754 | A_23_P57658   | HRASLS       | 2.010567028 | 0.014190637 | up   |
| 1755 | A_23_P88893   | DEF8         | 2.008185676 | 0.00000719  | up   |
| 1756 | A_23_P85800   | CD52         | 2.007790072 | 0.005276582 | up   |
| 1757 | A_33_P3232038 | RBAK-LOC389  | 2.007705041 | 0.0000274   | up   |
| 1758 | A_24_P288685  | IL13RA1      | 2.007397977 | 0.0000375   | up   |
| 1759 | A_23_P45955   | TEKT2        | 2.007192382 | 0.039280963 | up   |
| 1760 | A_24_P263672  | BMS1         | 2.007032066 | 0.0000355   | up   |
| 1761 | A_33_P3272948 | C17orf107    | 2.006731596 | 0.000033    | up   |
| 1762 | A_33_P3341676 | MEF2A        | 2.006132645 | 0.00000848  | up   |
| 1763 | A_33_P3294297 | RNF126       | 2.005298492 | 0.000174409 | up   |
| 1764 | A_33_P3313215 | LRIT2        | 2.005170711 | 0.0000543   | up   |
| 1765 | A_33_P3303031 | FLJ40606     | 2.002830041 | 0.006572659 | up   |
| 1766 | A_33_P3285334 | LOC10013041  | 2.002653185 | 0.001410547 | up   |
| 1767 | A_23_P77980   | SLC4A1       | 2.001937499 | 0.003739186 | up   |
| 1768 | A_33_P3249529 | PCNX         | 2.001325737 | 0.000131682 | up   |
| 1769 | A_33_P3257503 | LOC387647    | 2.000861999 | 0.0000421   | up   |
| 1770 | A_23_P372925  | KIAA1737     | 2.000598969 | 0.0000356   | up   |
| 1771 | A_23_P143981  | FBLN2        | 2.000399986 | 0.000539264 | up   |
| 1772 | A_23_P41476   | SHISA3       | 478.1657545 | 1.17E-08    | down |
| 1773 | A_24_P291658  | ADH1A        | 313.5856287 | 0.000000303 | down |
| 1774 | A_33_P3295358 | ANGPTL4      | 253.1984273 | 2.58E-08    | down |
| 1775 | A_33_P3238290 | FAM65C       | 124.8234862 | 9.62E-09    | down |
| 1776 | A_23_P27306   | COLEC12      | 111.8936044 | 4.21E-09    | down |
| 1777 | A_23_P121926  | SEPP1        | 104.2580858 | 0.000000494 | down |
| 1778 | A_33_P3332018 | FGL2         | 94.68161    | 8.82E-08    | down |
| 1779 | A_24_P124349  | PDGFD        | 77.33951971 | 0.000000574 | down |
| 1780 | A_23_P52266   | IFIT1        | 69.61337904 | 1.91E-08    | down |
| 1781 | A_23_P324754  | KIAA1199     | 68.50248092 | 0.000000132 | down |

|      |               |          |             |             |      |
|------|---------------|----------|-------------|-------------|------|
| 1782 | A_23_P81158   | ADH1C    | 63.92630343 | 0.00000133  | down |
| 1783 | A_33_P3275702 | FMO2     | 61.46704963 | 0.00000119  | down |
| 1784 | A_23_P347169  | MTUS1    | 54.88092528 | 0.00000349  | down |
| 1785 | A_24_P260101  | MME      | 54.14487063 | 1.46E-09    | down |
| 1786 | A_23_P434398  | TXLNB    | 51.41363106 | 0.000000038 | down |
| 1787 | A_23_P211680  | MLC1     | 51.07378829 | 0.0000109   | down |
| 1788 | A_23_P205959  | ALDH1A3  | 49.34252594 | 7.27E-08    | down |
| 1789 | A_23_P200780  | TGFBR3   | 44.7127074  | 0.000000383 | down |
| 1790 | A_23_P34345   | VCAM1    | 40.90483661 | 0.000000231 | down |
| 1791 | A_33_P3255404 | CLDN11   | 37.86313596 | 2.32E-08    | down |
| 1792 | A_23_P382705  | TMTC2    | 35.61415445 | 0.000000287 | down |
| 1793 | A_23_P329261  | KCNJ2    | 34.65792156 | 1.04E-08    | down |
| 1794 | A_23_P101960  | ZFP36L2  | 33.31627806 | 0.000000184 | down |
| 1795 | A_23_P163216  | ATP8B4   | 28.71960496 | 4.03E-08    | down |
| 1796 | A_23_P144476  | SPRY1    | 28.57787621 | 0.000000341 | down |
| 1797 | A_23_P202978  | CASP1    | 26.76919593 | 0.00000211  | down |
| 1798 | A_23_P137470  | SIPA1L2  | 26.6040995  | 0.000000386 | down |
| 1799 | A_23_P369899  | TMEM158  | 26.41261063 | 0.000000194 | down |
| 1800 | A_23_P102391  | SLC40A1  | 25.44690571 | 0.000000658 | down |
| 1801 | A_23_P121064  | PTX3     | 23.20875133 | 9.4E-10     | down |
| 1802 | A_23_P118615  | ABCA8    | 22.5466726  | 0.000000664 | down |
| 1803 | A_33_P3244728 | LRP2     | 21.39329106 | 0.000226498 | down |
| 1804 | A_23_P83134   | GAS1     | 20.30086084 | 0.00000106  | down |
| 1805 | A_23_P54144   | BMP4     | 20.05115356 | 0.00000336  | down |
| 1806 | A_23_P218858  | ABI3BP   | 20.02211768 | 0.00000143  | down |
| 1807 | A_33_P3221129 | LRRN4CL  | 20.00736588 | 0.000000437 | down |
| 1808 | A_23_P252062  | PPARG    | 19.86048983 | 0.00000016  | down |
| 1809 | A_23_P72117   | SMPDL3A  | 19.73626609 | 7.82E-08    | down |
| 1810 | A_33_P3270489 | C6orf97  | 19.45297452 | 0.00000118  | down |
| 1811 | A_24_P579356  | ARHGAP28 | 19.29155368 | 0.0000214   | down |
| 1812 | A_23_P79968   | PCSK2    | 19.23510011 | 0.000054    | down |
| 1813 | A_23_P69573   | GUCY1A3  | 19.11002994 | 0.000000485 | down |
| 1814 | A_24_P403417  | PTGES    | 18.15683202 | 0.0000671   | down |
| 1815 | A_24_P941167  | APOL6    | 18.07554489 | 0.00019708  | down |
| 1816 | A_33_P3304983 | PRKAR2B  | 17.96364568 | 0.00000177  | down |
| 1817 | A_33_P3283480 | CTSC     | 17.93339424 | 0.000000239 | down |
| 1818 | A_33_P3213822 | KCNK2    | 17.58757333 | 0.000000105 | down |
| 1819 | A_24_P48204   | SECTM1   | 17.26996356 | 2.43E-09    | down |
| 1820 | A_32_P202013  | FAM196A  | 17.1404225  | 0.000000239 | down |
| 1821 | A_33_P3390013 | ADAMTS1  | 17.09310716 | 8.65E-09    | down |
| 1822 | A_23_P74278   | PDE4B    | 17.00161118 | 0.000000321 | down |
| 1823 | A_23_P110253  | KIT      | 16.761181   | 0.000000192 | down |
| 1824 | A_23_P213857  | C7       | 15.95513488 | 0.000000697 | down |
| 1825 | A_23_P378416  | GPM6B    | 15.93574873 | 0.000000453 | down |
| 1826 | A_24_P226755  | TOX      | 15.93281965 | 7.38E-08    | down |
| 1827 | A_23_P73097   | RGS20    | 15.83098262 | 5.56E-08    | down |
| 1828 | A_23_P18447   | PPARGC1A | 15.82194547 | 0.00000799  | down |
| 1829 | A_23_P33326   | ADRA1B   | 15.6773075  | 2.81E-08    | down |
| 1830 | A_23_P52227   | GDF10    | 15.60030684 | 1.02E-08    | down |
| 1831 | A_24_P208436  | PDE1A    | 15.49572338 | 0.00000542  | down |
| 1832 | A_23_P12082   | CHI3L2   | 15.44222678 | 0.000000548 | down |

|      |               |            |             |             |      |
|------|---------------|------------|-------------|-------------|------|
| 1833 | A_23_P501831  | C5orf4     | 15.35005231 | 0.00000225  | down |
| 1834 | A_23_P64173   | CARD16     | 15.29250985 | 0.00000939  | down |
| 1835 | A_23_P362191  | NCRNA00324 | 15.02690613 | 0.0000228   | down |
| 1836 | A_23_P201808  | PPAP2B     | 14.90631417 | 5.06E-08    | down |
| 1837 | A_24_P108311  | NEDD4L     | 14.84654573 | 0.00000175  | down |
| 1838 | A_23_P61406   | SHC3       | 14.82578921 | 0.000000136 | down |
| 1839 | A_23_P8820    | FABP4      | 14.66342011 | 0.0000185   | down |
| 1840 | A_23_P156890  | TCF21      | 14.33705365 | 0.00000516  | down |
| 1841 | A_24_P133253  | KITLG      | 14.22401817 | 0.000000169 | down |
| 1842 | A_24_P759477  | ITGB8      | 13.98620192 | 0.000000359 | down |
| 1843 | A_23_P156861  | RGS17      | 13.97781998 | 2.86E-08    | down |
| 1844 | A_32_P46214   | SLC9A9     | 13.97269109 | 1.61E-08    | down |
| 1845 | A_33_P3276693 | PGF        | 13.56258399 | 0.000000982 | down |
| 1846 | A_33_P3276703 | VGFB       | 13.48189822 | 0.0000203   | down |
| 1847 | A_23_P63402   | GPSM2      | 13.46317742 | 0.00000345  | down |
| 1848 | A_23_P53137   | HBG1       | 13.2612972  | 0.00000925  | down |
| 1849 | A_23_P127948  | ADM        | 13.1887354  | 1.31E-12    | down |
| 1850 | A_23_P131208  | NR4A2      | 13.07055805 | 0.0000178   | down |
| 1851 | A_23_P257583  | DENND2A    | 13.01286898 | 1.08E-08    | down |
| 1852 | A_24_P915692  | PHLDA1     | 12.92617927 | 0.000000901 | down |
| 1853 | A_24_P870620  | PTN        | 12.66909881 | 0.000000213 | down |
| 1854 | A_33_P3225273 | QSOX1      | 12.3436866  | 0.003408547 | down |
| 1855 | A_33_P3263217 | LRRC4      | 12.31982024 | 0.000230021 | down |
| 1856 | A_23_P431268  | PLEKHA6    | 12.26135771 | 0.00000274  | down |
| 1857 | A_32_P88262   | SLC7A14    | 12.23701972 | 0.000000526 | down |
| 1858 | A_23_P217379  | COL4A6     | 12.13693754 | 0.00000202  | down |
| 1859 | A_33_P3240018 | PDE3B      | 12.11951393 | 0.00000191  | down |
| 1860 | A_24_P200023  | IL1R1      | 11.98511627 | 0.000000403 | down |
| 1861 | A_23_P114740  | CFH        | 11.94099099 | 0.000000339 | down |
| 1862 | A_33_P3283611 | IFIT3      | 11.93650026 | 0.000000945 | down |
| 1863 | A_24_P928052  | NRP1       | 11.92746323 | 6.7E-10     | down |
| 1864 | A_33_P3212575 | NNAT       | 11.90050178 | 6.33E-08    | down |
| 1865 | A_23_P138352  | WNT2B      | 11.83322901 | 0.000000698 | down |
| 1866 | A_32_P164246  | FOXQ1      | 11.75327765 | 0.00000396  | down |
| 1867 | A_23_P69810   | AGPAT9     | 11.74039058 | 0.00000518  | down |
| 1868 | A_23_P167920  | DLL1       | 11.59066015 | 0.000000149 | down |
| 1869 | A_23_P404481  | S1PR1      | 11.51552276 | 0.00000155  | down |
| 1870 | A_24_P681011  | HIPK2      | 11.50166512 | 0.0000288   | down |
| 1871 | A_23_P134854  | CLDN23     | 11.28078349 | 0.000000518 | down |
| 1872 | A_33_P3232552 | GUCY1B3    | 11.24843224 | 0.00000527  | down |
| 1873 | A_23_P85682   | NFIA       | 11.13664703 | 0.0000214   | down |
| 1874 | A_33_P3599591 | PAPPA      | 11.12140381 | 0.00000145  | down |
| 1875 | A_23_P145984  | TSPAN12    | 11.05652458 | 9.09E-08    | down |
| 1876 | A_24_P333857  | SGIP1      | 11.04850298 | 0.00000107  | down |
| 1877 | A_33_P3372426 | ADAMTS5    | 11.0218228  | 0.00000388  | down |
| 1878 | A_23_P12884   | GRK5       | 11.01043579 | 0.00000176  | down |
| 1879 | A_23_P111311  | AKAP12     | 10.98969595 | 0.000000417 | down |
| 1880 | A_23_P82868   | PLAT       | 10.90675984 | 1.37E-08    | down |
| 1881 | A_33_P3352522 | FLJ41484   | 10.89980888 | 0.00000538  | down |
| 1882 | A_33_P3307363 | LPHN2      | 10.83717883 | 0.000000196 | down |
| 1883 | A_23_P216361  | COL14A1    | 10.8033125  | 0.00000182  | down |

|      |               |           |             |             |      |
|------|---------------|-----------|-------------|-------------|------|
| 1884 | A_24_P274814  | TBXAS1    | 10.78201512 | 0.000000151 | down |
| 1885 | A_24_P192805  | CARD17    | 10.69170797 | 0.000000191 | down |
| 1886 | A_33_P3237379 | KCNC1     | 10.56638297 | 0.000202127 | down |
| 1887 | A_23_P138541  | AKR1C3    | 10.53283794 | 0.0000016   | down |
| 1888 | A_33_P3230269 | GRHL1     | 10.43516398 | 0.00000167  | down |
| 1889 | A_23_P24948   | KCNE3     | 10.30677778 | 0.00000344  | down |
| 1890 | A_33_P3331125 | SLC2A12   | 10.19742247 | 0.00000217  | down |
| 1891 | A_33_P3217983 | ACSL5     | 10.18465637 | 0.000000101 | down |
| 1892 | A_24_P940275  | FRMPD4    | 9.993242517 | 0.000358043 | down |
| 1893 | A_23_P372308  | RGMA      | 9.959651995 | 1.25E-08    | down |
| 1894 | A_33_P3368771 | C3orf47   | 9.891497836 | 0.0000725   | down |
| 1895 | A_33_P3377130 | MAP3K5    | 9.754061036 | 0.00000868  | down |
| 1896 | A_24_P382187  | IGFBP4    | 9.740138814 | 0.000599056 | down |
| 1897 | A_23_P115011  | ADAMTSL4  | 9.730913865 | 0.000101452 | down |
| 1898 | A_24_P141214  | STOM      | 9.667295448 | 0.0000009   | down |
| 1899 | A_23_P500400  | ABCA6     | 9.653970155 | 0.000737603 | down |
| 1900 | A_24_P220485  | OLFML2A   | 9.642273376 | 0.000000224 | down |
| 1901 | A_23_P26386   | TPPP3     | 9.612491607 | 0.000131566 | down |
| 1902 | A_33_P3301940 | PDE7B     | 9.60994384  | 0.00000197  | down |
| 1903 | A_23_P414958  | PLXNC1    | 9.578997652 | 0.000176493 | down |
| 1904 | A_23_P134426  | GPNMB     | 9.576567625 | 7.17E-08    | down |
| 1905 | A_24_P243749  | PDK4      | 9.545255841 | 0.00000498  | down |
| 1906 | A_33_P3423941 | IFITM1    | 9.510839346 | 4.02E-08    | down |
| 1907 | A_32_P60065   | F2RL2     | 9.444243027 | 0.0000105   | down |
| 1908 | A_23_P113161  | C1orf21   | 9.367180292 | 1.26E-08    | down |
| 1909 | A_23_P420551  | CIT       | 9.349797808 | 0.000000437 | down |
| 1910 | A_23_P162211  | MANSC1    | 9.331598917 | 0.00000261  | down |
| 1911 | A_24_P171268  | RASSF5    | 9.296880854 | 0.000000235 | down |
| 1912 | A_32_P47157   | FP588     | 9.283261554 | 0.00000344  | down |
| 1913 | A_32_P128656  | MID1      | 9.278389002 | 0.000000079 | down |
| 1914 | A_23_P217428  | ARHGAP6   | 9.218489863 | 0.00000262  | down |
| 1915 | A_32_P208403  | GNG2      | 9.210768292 | 0.000000268 | down |
| 1916 | A_23_P76914   | SIX1      | 9.062078574 | 2.13E-10    | down |
| 1917 | A_33_P3317603 | B4GALNT4  | 9.025387033 | 0.000370406 | down |
| 1918 | A_24_P402080  | MBP       | 8.941206804 | 0.000000284 | down |
| 1919 | A_33_P3270514 | NBLA00301 | 8.904038105 | 0.00000509  | down |
| 1920 | A_24_P49260   | SPTLC3    | 8.890008715 | 0.00000202  | down |
| 1921 | A_33_P3226810 | TNFSF10   | 8.888721343 | 0.000154268 | down |
| 1922 | A_23_P385322  | STAMBPL1  | 8.866393138 | 0.00020622  | down |
| 1923 | A_33_P3250348 | PCDH18    | 8.805900237 | 0.00000436  | down |
| 1924 | A_32_P196021  | FGF7      | 8.764786607 | 0.000000965 | down |
| 1925 | A_23_P45324   | TMEM35    | 8.598858573 | 0.0000172   | down |
| 1926 | A_23_P420196  | SOCS1     | 8.536918068 | 0.000000165 | down |
| 1927 | A_23_P216596  | SVEP1     | 8.493001472 | 0.00000325  | down |
| 1928 | A_33_P3773168 | LOC285768 | 8.486503056 | 0.000281316 | down |
| 1929 | A_32_P37867   | KIAA1644  | 8.478065427 | 0.00000125  | down |
| 1930 | A_33_P3237110 | GPR137C   | 8.430179012 | 0.00000172  | down |
| 1931 | A_23_P11685   | PLA2G4A   | 8.429804851 | 0.000000398 | down |
| 1932 | A_33_P3212615 | TFPI      | 8.398860852 | 0.00000134  | down |
| 1933 | A_23_P77993   | C1QL1     | 8.384797838 | 0.000118872 | down |
| 1934 | A_23_P65307   | SLITRK6   | 8.281252586 | 0.0000287   | down |

|      |               |             |             |             |      |
|------|---------------|-------------|-------------|-------------|------|
| 1935 | A_23_P385067  | CLIC6       | 8.21027588  | 0.000185467 | down |
| 1936 | A_33_P3369058 | LRRK2       | 8.200056404 | 8.93E-08    | down |
| 1937 | A_23_P304897  | BDKRB2      | 8.191747991 | 0.0000018   | down |
| 1938 | A_33_P3423185 | DPF3        | 8.158983559 | 0.0000166   | down |
| 1939 | A_23_P205867  | NR2E3       | 8.126104589 | 0.000000696 | down |
| 1940 | A_23_P55544   | CCBE1       | 8.086080502 | 0.0000027   | down |
| 1941 | A_33_P3368855 | GPC5        | 8.083938615 | 0.0000081   | down |
| 1942 | A_24_P55496   | OSR2        | 8.065485806 | 0.0000132   | down |
| 1943 | A_24_P941359  | FAM65B      | 8.035506516 | 0.00000565  | down |
| 1944 | A_23_P417918  | PENK        | 8.008288416 | 0.0000204   | down |
| 1945 | A_33_P3239455 | GTF2IRD2    | 7.939014328 | 0.0000455   | down |
| 1946 | A_24_P321581  | SLC38A4     | 7.938720111 | 0.00000382  | down |
| 1947 | A_23_P140057  | TNFRSF19    | 7.881552473 | 0.001037387 | down |
| 1948 | A_23_P155596  | FMO3        | 7.867317278 | 0.0000274   | down |
| 1949 | A_24_P344961  | AMOT        | 7.850440819 | 0.00000214  | down |
| 1950 | A_33_P3278078 | LOC10050550 | 7.846501609 | 0.0000128   | down |
| 1951 | A_32_P198731  | NEURL1B     | 7.817765262 | 0.000000602 | down |
| 1952 | A_23_P352266  | BCL2        | 7.812011827 | 8.52E-08    | down |
| 1953 | A_23_P63209   | HSD11B1     | 7.809974836 | 0.0000157   | down |
| 1954 | A_23_P21324   | TWIST2      | 7.783120356 | 0.00000154  | down |
| 1955 | A_33_P3276713 | HGF         | 7.762899624 | 0.0000114   | down |
| 1956 | A_23_P159974  | KLHL13      | 7.738897939 | 0.000000851 | down |
| 1957 | A_33_P3369371 | GPX3        | 7.714678845 | 0.0000584   | down |
| 1958 | A_23_P58251   | CPZ         | 7.702738599 | 0.0000824   | down |
| 1959 | A_23_P345460  | PLEKHG4     | 7.638651998 | 0.000000146 | down |
| 1960 | A_23_P30163   | FLJ13197    | 7.63567254  | 0.00000546  | down |
| 1961 | A_23_P82503   | PEG10       | 7.634655185 | 0.00000225  | down |
| 1962 | A_33_P3403117 | NR2F1       | 7.587103228 | 0.00000212  | down |
| 1963 | A_33_P3376546 | PTGFR       | 7.543647344 | 0.00000831  | down |
| 1964 | A_33_P3384462 | THSD4       | 7.536494696 | 1.64E-08    | down |
| 1965 | A_33_P3368646 | CNKSR3      | 7.520251965 | 0.00000582  | down |
| 1966 | A_23_P85952   | DENND2D     | 7.478579325 | 0.00000293  | down |
| 1967 | A_33_P3419190 | AREG        | 7.474971092 | 0.00000301  | down |
| 1968 | A_33_P3281283 | S1PR3       | 7.448837726 | 0.000000303 | down |
| 1969 | A_23_P207367  | STAT5A      | 7.431073128 | 0.00000402  | down |
| 1970 | A_23_P18123   | NLGN1       | 7.4007742   | 0.0000156   | down |
| 1971 | A_23_P415611  | NHEDC1      | 7.381178605 | 0.00000931  | down |
| 1972 | A_33_P3300837 | LDB2        | 7.375951997 | 0.0000376   | down |
| 1973 | A_24_P158946  | FGD4        | 7.358605197 | 0.0000171   | down |
| 1974 | A_33_P3385266 | ABCC6       | 7.319008055 | 1.69E-08    | down |
| 1975 | A_24_P12065   | CCNG2       | 7.293831139 | 7.55E-08    | down |
| 1976 | A_23_P48936   | SMAD3       | 7.241170898 | 8.47E-08    | down |
| 1977 | A_23_P134601  | WNT16       | 7.230600996 | 0.0000529   | down |
| 1978 | A_24_P208567  | IL18R1      | 7.217559855 | 0.00000544  | down |
| 1979 | A_33_P3408918 | SAA2        | 7.213378699 | 0.000158791 | down |
| 1980 | A_24_P330263  | EDNRB       | 7.175264428 | 0.00000233  | down |
| 1981 | A_23_P216307  | RUNX1T1     | 7.161470069 | 0.000133149 | down |
| 1982 | A_23_P14986   | HSD11B2     | 7.14191848  | 0.000000303 | down |
| 1983 | A_23_P32404   | ISG20       | 7.13162577  | 0.0000241   | down |
| 1984 | A_23_P391396  | EBF3        | 7.095295812 | 0.000011    | down |
| 1985 | A_23_P74701   | COL24A1     | 7.091979831 | 0.000000153 | down |



|      |               |           |             |             |      |
|------|---------------|-----------|-------------|-------------|------|
| 1986 | A_33_P3849275 | FHL1      | 7.086944086 | 0.0000016   | down |
| 1987 | A_32_P108156  | MIR155HG  | 7.049205351 | 0.000000514 | down |
| 1988 | A_33_P3367636 | C6orf221  | 7.047864723 | 0.0000177   | down |
| 1989 | A_23_P29939   | SNCA      | 7.034218585 | 0.000000631 | down |
| 1990 | A_33_P3279590 | OGN       | 6.975535624 | 0.00000601  | down |
| 1991 | A_23_P400449  | VAT1L     | 6.948360788 | 0.0000426   | down |
| 1992 | A_33_P3393650 | PLEKHA5   | 6.914108133 | 0.00041612  | down |
| 1993 | A_33_P3289227 | DNALI1    | 6.894968688 | 0.00000809  | down |
| 1994 | A_32_P2452    | TMTC1     | 6.879413147 | 0.00000316  | down |
| 1995 | A_23_P103511  | C1orf226  | 6.87350202  | 0.0000162   | down |
| 1996 | A_33_P3213362 | CASC2     | 6.855372691 | 0.006195849 | down |
| 1997 | A_23_P14124   | RASL11A   | 6.853315478 | 0.000000655 | down |
| 1998 | A_33_P3263890 | PRRX1     | 6.805002382 | 0.00000282  | down |
| 1999 | A_23_P33759   | DHRS3     | 6.736361992 | 7.63E-08    | down |
| 2000 | A_32_P86905   | KGFLP2    | 6.723140659 | 0.00000972  | down |
| 2001 | A_23_P80974   | TDO2      | 6.71997547  | 0.00000187  | down |
| 2002 | A_33_P3412468 | SLC25A27  | 6.712221075 | 0.001063188 | down |
| 2003 | A_33_P3374623 | ABCA7     | 6.665416989 | 0.000095    | down |
| 2004 | A_23_P118065  | HSD17B2   | 6.646964429 | 0.00000278  | down |
| 2005 | A_33_P3383326 | LPAR1     | 6.629415453 | 0.000000748 | down |
| 2006 | A_24_P235338  | TRPA1     | 6.627349178 | 0.00000208  | down |
| 2007 | A_33_P3414591 | TWIST1    | 6.609364678 | 0.0000565   | down |
| 2008 | A_23_P97402   | CAMK1G    | 6.595555775 | 0.00000855  | down |
| 2009 | A_24_P237778  | MAN1C1    | 6.543824393 | 0.0000511   | down |
| 2010 | A_32_P790284  | KATNAL2   | 6.531314442 | 0.00000523  | down |
| 2011 | A_23_P255104  | LHFPL2    | 6.468307057 | 0.000000819 | down |
| 2012 | A_32_P205624  | SHC2      | 6.455970859 | 0.00000282  | down |
| 2013 | A_23_P156708  | TNXB      | 6.454648651 | 0.00000008  | down |
| 2014 | A_23_P328621  | UBQLNL    | 6.447949896 | 0.000000274 | down |
| 2015 | A_23_P24004   | IFIT2     | 6.416381102 | 0.000000662 | down |
| 2016 | A_24_P289178  | C16orf74  | 6.404837643 | 0.000000573 | down |
| 2017 | A_24_P229531  | OBFC2A    | 6.402938857 | 0.0000155   | down |
| 2018 | A_23_P16953   | HTR2B     | 6.394270013 | 0.00018269  | down |
| 2019 | A_23_P126908  | TNFRSF14  | 6.382145797 | 0.00000754  | down |
| 2020 | A_23_P86470   | CH25H     | 6.358832029 | 0.00000422  | down |
| 2021 | A_33_P3285868 | CYGB      | 6.339050084 | 0.000000165 | down |
| 2022 | A_33_P3290403 | IMPA2     | 6.309263188 | 0.000109072 | down |
| 2023 | A_33_P3729375 | LOC285181 | 6.297528736 | 0.0000063   | down |
| 2024 | A_23_P30666   | TNFRSF21  | 6.278110115 | 0.00000672  | down |
| 2025 | A_24_P10137   | C13orf15  | 6.265408897 | 0.00000136  | down |
| 2026 | A_32_P146113  | C6orf81   | 6.254377357 | 0.000225312 | down |
| 2027 | A_33_P3314176 | FAM46C    | 6.19651835  | 0.000000161 | down |
| 2028 | A_23_P163087  | NID2      | 6.17217514  | 0.00000232  | down |
| 2029 | A_23_P255896  | C2orf89   | 6.150918669 | 0.02633848  | down |
| 2030 | A_23_P112103  | GSDMD     | 6.129313654 | 0.001605034 | down |
| 2031 | A_33_P3424062 | KCNF1     | 6.113186156 | 0.0000301   | down |
| 2032 | A_23_P369701  | FAM108C1  | 6.108280582 | 0.00000289  | down |
| 2033 | A_24_P80500   | BDH2      | 6.079824586 | 0.000000795 | down |
| 2034 | A_23_P433016  | FBLN1     | 6.070191371 | 0.0000198   | down |
| 2035 | A_23_P76136   | TSPAN11   | 6.031393378 | 0.000000527 | down |
| 2036 | A_23_P82929   | NOV       | 5.99612226  | 0.00000658  | down |

|      |               |             |             |             |      |
|------|---------------|-------------|-------------|-------------|------|
| 2037 | A_23_P300033  | PDGFRA      | 5.97188617  | 0.000000478 | down |
| 2038 | A_24_P219474  | MGAT5B      | 5.962074075 | 0.00000324  | down |
| 2039 | A_23_P18078   | RARRES1     | 5.958960427 | 0.00000141  | down |
| 2040 | A_33_P3259135 | D4S234E     | 5.949211905 | 0.00000513  | down |
| 2041 | A_32_P112493  | PKDCC       | 5.942608476 | 0.000362832 | down |
| 2042 | A_23_P35725   | ANO3        | 5.938487508 | 0.000000284 | down |
| 2043 | A_33_P3259557 | LOC440104   | 5.932046883 | 0.00000379  | down |
| 2044 | A_23_P32577   | DACH1       | 5.925817381 | 0.0000708   | down |
| 2045 | A_23_P134835  | CSGALNACT1  | 5.92269311  | 0.000000123 | down |
| 2046 | A_23_P384044  | CNIH3       | 5.911070934 | 0.00000275  | down |
| 2047 | A_23_P61487   | LRRC20      | 5.893781869 | 0.000000247 | down |
| 2048 | A_24_P140569  | LRRTM2      | 5.891748986 | 0.000000754 | down |
| 2049 | A_23_P363778  | FRZB        | 5.869657541 | 0.000000426 | down |
| 2050 | A_33_P3235053 | TRIM47      | 5.860965452 | 0.00000171  | down |
| 2051 | A_24_P304154  | AMPD3       | 5.86077858  | 0.00000235  | down |
| 2052 | A_33_P3368014 | HVCN1       | 5.859254708 | 0.00000332  | down |
| 2053 | A_33_P3388466 | BTN3A1      | 5.859090226 | 0.0000425   | down |
| 2054 | A_33_P3341601 | WDR86       | 5.854078669 | 0.018736901 | down |
| 2055 | A_24_P68079   | TRANK1      | 5.847560298 | 0.000000823 | down |
| 2056 | A_23_P9293    | TJP2        | 5.836751581 | 0.00000225  | down |
| 2057 | A_23_P428129  | CDKN1C      | 5.818129198 | 1.46E-08    | down |
| 2058 | A_24_P183128  | PLAC8       | 5.812971492 | 0.00000156  | down |
| 2059 | A_23_P164047  | MMD         | 5.807886796 | 9.68E-09    | down |
| 2060 | A_24_P945113  | ACVRL1      | 5.755933802 | 0.00000314  | down |
| 2061 | A_23_P88626   | ANPEP       | 5.754989648 | 0.00010294  | down |
| 2062 | A_23_P135239  | TLE1        | 5.748869705 | 0.000000339 | down |
| 2063 | A_33_P3413815 | LAMB2P1     | 5.740555965 | 0.0000135   | down |
| 2064 | A_23_P310022  | KIAA1217    | 5.731501092 | 0.0000191   | down |
| 2065 | A_23_P14564   | GPR65       | 5.729530406 | 0.000000823 | down |
| 2066 | A_23_P69497   | CLEC3B      | 5.724169264 | 0.000000979 | down |
| 2067 | A_23_P360079  | NCKAP5      | 5.695290244 | 0.0000183   | down |
| 2068 | A_23_P428298  | UNC5CL      | 5.689646947 | 0.000309219 | down |
| 2069 | A_23_P326931  | TTC18       | 5.680898395 | 0.000000644 | down |
| 2070 | A_24_P150580  | RASL12      | 5.676052106 | 0.0000321   | down |
| 2071 | A_23_P115645  | CELF2       | 5.673259805 | 0.00000201  | down |
| 2072 | A_33_P3379061 | C9orf47     | 5.660951513 | 0.0000119   | down |
| 2073 | A_24_P200854  | HOXA2       | 5.65906026  | 0.0000182   | down |
| 2074 | A_23_P210763  | JAG1        | 5.633453702 | 0.00000135  | down |
| 2075 | A_23_P37375   | RPS6KA5     | 5.602129241 | 0.000088    | down |
| 2076 | A_23_P48771   | C14orf159   | 5.60130246  | 0.000000377 | down |
| 2077 | A_23_P157117  | CREB5       | 5.59767037  | 0.000000123 | down |
| 2078 | A_33_P3355921 | LOC10013089 | 5.578242423 | 0.0000162   | down |
| 2079 | A_32_P44453   | INPP1       | 5.562243873 | 0.0000058   | down |
| 2080 | A_23_P301521  | KIAA1462    | 5.555070932 | 0.00000217  | down |
| 2081 | A_33_P3347697 | NOVA1       | 5.553979941 | 0.0000205   | down |
| 2082 | A_33_P3338733 | MITF        | 5.541343626 | 0.000102384 | down |
| 2083 | A_33_P3255914 | MYLIP       | 5.53667306  | 0.0000122   | down |
| 2084 | A_23_P66017   | PRRT2       | 5.535819231 | 0.00000335  | down |
| 2085 | A_32_P4018    | ROR1        | 5.520011095 | 0.00000102  | down |
| 2086 | A_23_P302550  | RGS18       | 5.506586585 | 0.00021292  | down |
| 2087 | A_24_P238499  | C18orf56    | 5.503350826 | 0.0000119   | down |

|      |               |             |             |             |      |
|------|---------------|-------------|-------------|-------------|------|
| 2088 | A_23_P69109   | PLSCR1      | 5.495147984 | 0.000000015 | down |
| 2089 | A_23_P75786   | SLC15A3     | 5.464508096 | 0.000000522 | down |
| 2090 | A_32_P158966  | KLRF1       | 5.463449156 | 0.000324543 | down |
| 2091 | A_33_P3328863 | PNMAL2      | 5.446923354 | 0.000512208 | down |
| 2092 | A_33_P3333777 | LOC10012938 | 5.430050192 | 0.000000987 | down |
| 2093 | A_23_P316447  | FGFR1       | 5.41320003  | 0.000011    | down |
| 2094 | A_33_P3230478 | C1S         | 5.412404509 | 0.003403987 | down |
| 2095 | A_33_P3231047 | CCDC121     | 5.402398268 | 0.0000846   | down |
| 2096 | A_33_P3261982 | PRIM2       | 5.38463094  | 0.000589201 | down |
| 2097 | A_23_P57709   | PCOLCE2     | 5.383105997 | 0.000000928 | down |
| 2098 | A_23_P157007  | TMEM176B    | 5.374166057 | 0.00000568  | down |
| 2099 | A_32_P148538  | LPPR4       | 5.374021153 | 0.000000206 | down |
| 2100 | A_23_P44466   | CCDC102B    | 5.372766599 | 0.00000492  | down |
| 2101 | A_23_P30243   | ERAP2       | 5.356716087 | 0.00000269  | down |
| 2102 | A_33_P3420259 | RN28S1      | 5.351961607 | 0.0000187   | down |
| 2103 | A_23_P139704  | DUSP6       | 5.345380573 | 0.00000303  | down |
| 2104 | A_23_P89780   | LAMA3       | 5.340965382 | 0.00000483  | down |
| 2105 | A_23_P307844  | PHYHD1      | 5.299172533 | 0.0000318   | down |
| 2106 | A_23_P87049   | SORL1       | 5.297605939 | 0.00004     | down |
| 2107 | A_24_P217904  | TRERF1      | 5.294462888 | 0.00000558  | down |
| 2108 | A_33_P3231739 | ELOVL2      | 5.286104333 | 0.00000987  | down |
| 2109 | A_33_P3361422 | CYP27A1     | 5.264918991 | 0.00000123  | down |
| 2110 | A_33_P3363168 | SSH2        | 5.247123209 | 4.93E-08    | down |
| 2111 | A_23_P358709  | AHRR        | 5.208905149 | 5.63E-08    | down |
| 2112 | A_33_P3257513 | FAT3        | 5.206957267 | 0.0000698   | down |
| 2113 | A_24_P555510  | PCM1        | 5.199732239 | 0.000000975 | down |
| 2114 | A_33_P3363720 | C1orf213    | 5.198610979 | 0.00000244  | down |
| 2115 | A_33_P3367301 | GJD3        | 5.197478073 | 0.00000384  | down |
| 2116 | A_33_P3418025 | CTSO        | 5.191215337 | 0.000000433 | down |
| 2117 | A_33_P3264269 | MOV10       | 5.164898628 | 0.021738824 | down |
| 2118 | A_23_P216225  | EGR3        | 5.157457401 | 0.000011    | down |
| 2119 | A_23_P212119  | GALNTL2     | 5.148307883 | 0.000058    | down |
| 2120 | A_23_P202448  | CXCL12      | 5.133925996 | 0.00000179  | down |
| 2121 | A_24_P411561  | HAVCR2      | 5.127646953 | 0.0000232   | down |
| 2122 | A_23_P13753   | NFE2        | 5.11890938  | 0.000021    | down |
| 2123 | A_23_P49539   | BAHCC1      | 5.115512083 | 0.0000529   | down |
| 2124 | A_24_P926507  | SLC14A1     | 5.109051695 | 0.0000693   | down |
| 2125 | A_23_P143713  | APOBEC3G    | 5.102594749 | 0.0000659   | down |
| 2126 | A_23_P118834  | TOP2A       | 5.088315991 | 0.0000505   | down |
| 2127 | A_23_P97700   | TXNIP       | 5.079682527 | 0.00000832  | down |
| 2128 | A_33_P3266010 | RIN1        | 5.079490051 | 0.000062    | down |
| 2129 | A_24_P342632  | AK5         | 5.078095171 | 0.0000147   | down |
| 2130 | A_32_P101917  | LOC400550   | 5.065854005 | 0.00000183  | down |
| 2131 | A_23_P151133  | TSPAN9      | 5.064232591 | 0.000337064 | down |
| 2132 | A_23_P25615   | SOHLH2      | 5.052566366 | 0.0000088   | down |
| 2133 | A_33_P3245415 | N4BP2L1     | 5.049311095 | 0.000000117 | down |
| 2134 | A_23_P324327  | GPRC5B      | 5.02887723  | 0.0000408   | down |
| 2135 | A_24_P252078  | BTN3A2      | 5.020861167 | 0.00000107  | down |
| 2136 | A_23_P30254   | PLK2        | 5.017755473 | 0.00000356  | down |
| 2137 | A_33_P3414880 | LOC339192   | 5.010028348 | 0.00103358  | down |
| 2138 | A_33_P3219245 | C9orf130    | 4.997110776 | 0.0000185   | down |

|      |               |             |             |             |      |
|------|---------------|-------------|-------------|-------------|------|
| 2139 | A_33_P3288159 | ASPM        | 4.991231432 | 0.0000165   | down |
| 2140 | A_33_P3350374 | C10orf58    | 4.98312524  | 0.00080712  | down |
| 2141 | A_23_P94840   | DYNLRB2     | 4.98014587  | 0.00000508  | down |
| 2142 | A_33_P3593774 | PIK3R3      | 4.970190675 | 0.000215496 | down |
| 2143 | A_33_P3407324 | GULP1       | 4.965249337 | 0.00000218  | down |
| 2144 | A_23_P165727  | MSTN        | 4.938042774 | 0.021971045 | down |
| 2145 | A_33_P3305731 | NINL        | 4.907566102 | 0.002620151 | down |
| 2146 | A_23_P502470  | IL6ST       | 4.894577166 | 0.000462112 | down |
| 2147 | A_23_P416965  | FAM149A     | 4.890201345 | 0.000743615 | down |
| 2148 | A_23_P21207   | UBA7        | 4.88559238  | 0.00003     | down |
| 2149 | A_33_P3312601 | AADA4L4     | 4.878622204 | 0.00011512  | down |
| 2150 | A_23_P414312  | KNDC1       | 4.870752916 | 0.0000196   | down |
| 2151 | A_23_P85082   | RHOXF1      | 4.870585462 | 0.000563153 | down |
| 2152 | A_23_P104563  | CPT1A       | 4.869787096 | 0.000000415 | down |
| 2153 | A_24_P115932  | GPR44       | 4.863423191 | 0.00000221  | down |
| 2154 | A_24_P658427  | NFIB        | 4.848881959 | 8.34E-08    | down |
| 2155 | A_23_P39131   | GLTSCR2     | 4.839445878 | 0.025649046 | down |
| 2156 | A_33_P3410589 | FAM43A      | 4.831462621 | 5.36E-08    | down |
| 2157 | A_23_P8834    | EPHX2       | 4.825741822 | 0.000000316 | down |
| 2158 | A_23_P252541  | RAB7B       | 4.825190272 | 0.0000156   | down |
| 2159 | A_32_P86763   | TGM2        | 4.820273478 | 0.006454376 | down |
| 2160 | A_23_P363255  | CCDC68      | 4.815577652 | 0.000000861 | down |
| 2161 | A_24_P406060  | RNF144B     | 4.8151789   | 0.00000158  | down |
| 2162 | A_23_P49816   | ADAP2       | 4.796879947 | 0.0000419   | down |
| 2163 | A_24_P8220    | HS6ST1      | 4.7901583   | 0.000000583 | down |
| 2164 | A_33_P3269218 | BAI2        | 4.773800136 | 0.00000395  | down |
| 2165 | A_23_P128215  | SOCS2       | 4.769395205 | 0.00000848  | down |
| 2166 | A_23_P66891   | CDC42EP4    | 4.767319556 | 0.000011    | down |
| 2167 | A_23_P374695  | TEK         | 4.753758675 | 5.31E-08    | down |
| 2168 | A_23_P430930  | RSPO2       | 4.741966486 | 1.56E-08    | down |
| 2169 | A_23_P164451  | TBX2        | 4.734626652 | 0.000046    | down |
| 2170 | A_23_P95930   | HMGA2       | 4.733763619 | 0.00000221  | down |
| 2171 | A_33_P3356361 | LOC10013108 | 4.723456264 | 0.00000359  | down |
| 2172 | A_23_P27229   | MYO15A      | 4.710351211 | 0.00000023  | down |
| 2173 | A_23_P363878  | RFTN2       | 4.701077073 | 0.00000567  | down |
| 2174 | A_23_P424582  | EGFL8       | 4.699028442 | 0.000000607 | down |
| 2175 | A_33_P3252281 | EYA4        | 4.694707148 | 0.0000568   | down |
| 2176 | A_33_P3306146 | PLAU        | 4.686290645 | 0.002811348 | down |
| 2177 | A_32_P103695  | FAM92A1     | 4.680869898 | 8.03E-08    | down |
| 2178 | A_23_P110196  | HERC5       | 4.668482688 | 0.0000809   | down |
| 2179 | A_23_P93772   | HOXA5       | 4.668418833 | 0.000000165 | down |
| 2180 | A_23_P139682  | PZP         | 4.658364297 | 0.00000679  | down |
| 2181 | A_23_P103256  | CFHR3       | 4.650179587 | 0.0000181   | down |
| 2182 | A_33_P3342126 | PRDM8       | 4.646224398 | 0.00000369  | down |
| 2183 | A_23_P252082  | TMEM176A    | 4.641470557 | 0.00000907  | down |
| 2184 | A_23_P150325  | TMEM133     | 4.640242598 | 0.00000112  | down |
| 2185 | A_23_P211207  | ADARB1      | 4.63508994  | 0.000000924 | down |
| 2186 | A_23_P94800   | S100A4      | 4.619658905 | 0.0000219   | down |
| 2187 | A_33_P3363560 | TMEM51      | 4.613088596 | 0.00000857  | down |
| 2188 | A_32_P169179  | MSX2P1      | 4.594251175 | 0.00000377  | down |
| 2189 | A_33_P3210278 | SYNE2       | 4.588527222 | 0.00000116  | down |

|      |               |              |             |             |      |
|------|---------------|--------------|-------------|-------------|------|
| 2190 | A_24_P658584  | SASH1        | 4.58279473  | 0.00000345  | down |
| 2191 | A_33_P3397073 | LOC10050754  | 4.581998967 | 0.0000204   | down |
| 2192 | A_23_P363316  | HOXB5        | 4.581920203 | 0.000000249 | down |
| 2193 | A_23_P45365   | COL4A5       | 4.579148441 | 0.000000413 | down |
| 2194 | A_23_P105138  | CAT          | 4.577553243 | 1.22E-08    | down |
| 2195 | A_23_P74088   | MMP23B       | 4.575162545 | 0.000000835 | down |
| 2196 | A_23_P89431   | CCL2         | 4.562330624 | 0.0000103   | down |
| 2197 | A_33_P3326225 | SAMD12       | 4.559153658 | 0.0000152   | down |
| 2198 | A_23_P254741  | SOD3         | 4.557745916 | 0.00000382  | down |
| 2199 | A_33_P3245183 | HRH1         | 4.554200054 | 0.00000025  | down |
| 2200 | A_24_P396702  | CD302        | 4.550611739 | 1.05E-08    | down |
| 2201 | A_23_P370588  | HOXB8        | 4.547305611 | 0.000241141 | down |
| 2202 | A_23_P259251  | KCND2        | 4.544549854 | 0.0000143   | down |
| 2203 | A_23_P200260  | PCNXL2       | 4.544279274 | 0.00000216  | down |
| 2204 | A_23_P358410  | SRGAP3       | 4.53348643  | 0.005107523 | down |
| 2205 | A_23_P26629   | PYCARD       | 4.533215252 | 0.00000116  | down |
| 2206 | A_23_P107247  | CACNA1G      | 4.526935967 | 0.00000618  | down |
| 2207 | A_24_P416997  | APOL3        | 4.519842915 | 0.0000201   | down |
| 2208 | A_33_P3290562 | GLI3         | 4.516833811 | 0.0000216   | down |
| 2209 | A_32_P167705  | AGBL2        | 4.508765049 | 0.00000305  | down |
| 2210 | A_33_P3281191 | NID1         | 4.507841115 | 0.000000389 | down |
| 2211 | A_24_P626850  | H6PD         | 4.501078211 | 0.000201997 | down |
| 2212 | A_23_P407614  | PYDC1        | 4.497239864 | 0.0000794   | down |
| 2213 | A_33_P3256828 | LOC100127911 | 4.485832962 | 0.0000759   | down |
| 2214 | A_24_P7143    | MYO1B        | 4.485259946 | 0.00060521  | down |
| 2215 | A_23_P1691    | MMP1         | 4.479215259 | 0.0000122   | down |
| 2216 | A_23_P415021  | METTL7A      | 4.478395679 | 0.0000312   | down |
| 2217 | A_24_P224488  | MAPT         | 4.474811157 | 0.00000366  | down |
| 2218 | A_23_P256084  | ARSE         | 4.472859784 | 0.00000367  | down |
| 2219 | A_23_P11800   | CAMK2N1      | 4.465567924 | 0.00000361  | down |
| 2220 | A_23_P60499   | ZNF462       | 4.458676    | 0.000539133 | down |
| 2221 | A_23_P135548  | DPYD         | 4.456685017 | 0.00000373  | down |
| 2222 | A_33_P3243832 | ZEB2         | 4.440269778 | 0.000118358 | down |
| 2223 | A_23_P45185   | FIGF         | 4.438665632 | 0.00000973  | down |
| 2224 | A_24_P82155   | ANKDD1A      | 4.438392946 | 0.0000312   | down |
| 2225 | A_24_P397255  | ENPP6        | 4.418303021 | 0.000139659 | down |
| 2226 | A_23_P110571  | MAST4        | 4.415344481 | 0.000684713 | down |
| 2227 | A_33_P3352019 | SCARA3       | 4.410005128 | 0.000000272 | down |
| 2228 | A_23_P3221    | SQRDL        | 4.407893397 | 0.00000472  | down |
| 2229 | A_33_P3371718 | SAT1         | 4.401402573 | 0.00000633  | down |
| 2230 | A_23_P23074   | IFI44        | 4.397163975 | 0.000000552 | down |
| 2231 | A_24_P6517    | PLEKHG1      | 4.393685687 | 0.0000898   | down |
| 2232 | A_33_P3308744 | LAMA4        | 4.391156644 | 8.19E-08    | down |
| 2233 | A_33_P3227691 | SLC9A5       | 4.38629355  | 0.000144877 | down |
| 2234 | A_23_P36658   | MGST1        | 4.382949329 | 0.00000413  | down |
| 2235 | A_23_P112289  | TMOD1        | 4.379946557 | 0.000000533 | down |
| 2236 | A_23_P134953  | PLIN2        | 4.379691748 | 0.000000992 | down |
| 2237 | A_24_P163237  | STOX2        | 4.373172732 | 0.0000204   | down |
| 2238 | A_23_P36305   | ATG16L2      | 4.36925629  | 0.00000921  | down |
| 2239 | A_23_P120594  | ACSS1        | 4.36860813  | 0.000000593 | down |
| 2240 | A_33_P3403723 | LOC10013030  | 4.365539635 | 0.00000555  | down |

|      |               |             |             |             |      |
|------|---------------|-------------|-------------|-------------|------|
| 2241 | A_33_P3361811 | NAA16       | 4.357333285 | 0.004653367 | down |
| 2242 | A_33_P3548860 | SEC1        | 4.35042325  | 0.000021    | down |
| 2243 | A_24_P235429  | ABCA1       | 4.349979192 | 0.0000206   | down |
| 2244 | A_33_P3365408 | MATL2963    | 4.349074633 | 0.000330269 | down |
| 2245 | A_32_P204239  | CDHR3       | 4.344390338 | 0.000200535 | down |
| 2246 | A_32_P117354  | LIMCH1      | 4.342499953 | 0.002665501 | down |
| 2247 | A_23_P18372   | B3GNT5      | 4.341930299 | 0.00000917  | down |
| 2248 | A_32_P358887  | SLC4A4      | 4.33606535  | 0.00000558  | down |
| 2249 | A_23_P69863   | PCDHB5      | 4.32586747  | 0.0000116   | down |
| 2250 | A_33_P3404531 | ZCWPW1      | 4.318480075 | 0.000834968 | down |
| 2251 | A_23_P41470   | DDX60       | 4.314265113 | 0.00000122  | down |
| 2252 | A_24_P896205  | LOC645722   | 4.313873884 | 0.000000404 | down |
| 2253 | A_32_P178499  | C16orf86    | 4.313036425 | 0.0000342   | down |
| 2254 | A_23_P42282   | C4B         | 4.304595475 | 0.00000123  | down |
| 2255 | A_33_P3280237 | CNRIP1      | 4.302152206 | 0.039487038 | down |
| 2256 | A_23_P158925  | GPR125      | 4.300352731 | 0.00000245  | down |
| 2257 | A_24_P342312  | ODZ4        | 4.296679996 | 0.00000236  | down |
| 2258 | A_33_P3398448 | PARP10      | 4.277578508 | 0.00000453  | down |
| 2259 | A_33_P3237775 | NR1H3       | 4.272071126 | 0.00000747  | down |
| 2260 | A_24_P182494  | DUSP10      | 4.271904316 | 0.000073    | down |
| 2261 | A_23_P206901  | NDE1        | 4.271769097 | 0.0000134   | down |
| 2262 | A_23_P363968  | C1RL        | 4.269029109 | 0.000000148 | down |
| 2263 | A_23_P78742   | FLT3LG      | 4.256065833 | 0.002447219 | down |
| 2264 | A_23_P316410  | NOX1        | 4.245784851 | 0.00001     | down |
| 2265 | A_23_P29096   | PDE9A       | 4.23864106  | 0.0000327   | down |
| 2266 | A_23_P109171  | BFSP1       | 4.232354093 | 0.0000164   | down |
| 2267 | A_24_P192301  | SEMA3A      | 4.227429904 | 0.000000256 | down |
| 2268 | A_23_P169978  | ZNF608      | 4.2273839   | 3.47E-08    | down |
| 2269 | A_23_P396666  | TBC1D2B     | 4.22686099  | 0.0000159   | down |
| 2270 | A_33_P3368139 | MAP3K1      | 4.224177623 | 0.0000153   | down |
| 2271 | A_23_P22352   | FRMD4A      | 4.219385781 | 0.000631758 | down |
| 2272 | A_23_P258493  | LMNB1       | 4.217917274 | 0.000179968 | down |
| 2273 | A_23_P124190  | TRIM34      | 4.213759282 | 0.00111565  | down |
| 2274 | A_23_P383986  | CHST15      | 4.209290269 | 0.00000296  | down |
| 2275 | A_24_P303454  | TIAM2       | 4.203277385 | 0.0000588   | down |
| 2276 | A_33_P3560679 | LOC10028722 | 4.200032719 | 0.0000106   | down |
| 2277 | A_23_P86021   | SELENBP1    | 4.186248634 | 0.000000207 | down |
| 2278 | A_23_P211957  | TGFBR2      | 4.178755456 | 0.00000326  | down |
| 2279 | A_23_P151870  | GLCE        | 4.175159077 | 0.0000466   | down |
| 2280 | A_33_P3368750 | PAQR5       | 4.174092196 | 0.0000744   | down |
| 2281 | A_23_P313389  | UGCG        | 4.164574304 | 0.00023192  | down |
| 2282 | A_32_P57810   | RNF157      | 4.164253512 | 0.0000326   | down |
| 2283 | A_33_P3312242 | CCL25       | 4.157845835 | 0.0000557   | down |
| 2284 | A_33_P3287959 | RASA4       | 4.150678723 | 0.0000019   | down |
| 2285 | A_23_P2705    | LPAR6       | 4.142426214 | 0.00000903  | down |
| 2286 | A_33_P3300747 | ADHFE1      | 4.137517364 | 0.000210099 | down |
| 2287 | A_33_P3388983 | C5orf56     | 4.129928486 | 0.00000613  | down |
| 2288 | A_23_P415652  | GALNT12     | 4.112403142 | 0.00000442  | down |
| 2289 | A_23_P130735  | SLC6A16     | 4.111340898 | 0.0000537   | down |
| 2290 | A_33_P3325349 | TSPAN5      | 4.107803014 | 0.000621164 | down |
| 2291 | A_23_P128744  | BDKRB1      | 4.099120308 | 0.000000873 | down |

|      |               |            |             |             |      |
|------|---------------|------------|-------------|-------------|------|
| 2292 | A_23_P34744   | CTSK       | 4.095308119 | 0.00000404  | down |
| 2293 | A_23_P416434  | PHF15      | 4.087340027 | 0.0000125   | down |
| 2294 | A_33_P3413483 | SORD       | 4.082688979 | 0.00000848  | down |
| 2295 | A_33_P3697530 | SEMA4D     | 4.080525336 | 0.0000441   | down |
| 2296 | A_33_P3404601 | C2         | 4.079045312 | 0.0000341   | down |
| 2297 | A_24_P396375  | ECE1       | 4.078696051 | 0.010783452 | down |
| 2298 | A_23_P218770  | RAC2       | 4.074117719 | 0.000000476 | down |
| 2299 | A_33_P3281795 | MGLL       | 4.073181683 | 0.000000679 | down |
| 2300 | A_23_P146294  | EFCAB1     | 4.063574375 | 0.002217565 | down |
| 2301 | A_23_P116898  | A2M        | 4.056844487 | 0.000000206 | down |
| 2302 | A_33_P3274930 | PMP22      | 4.046848947 | 0.000099    | down |
| 2303 | A_23_P210675  | SYCP2      | 4.045987324 | 0.000018    | down |
| 2304 | A_32_P107002  | RUNDC2A    | 4.044488802 | 0.001177547 | down |
| 2305 | A_24_P85775   | C1orf38    | 4.040172429 | 0.00009     | down |
| 2306 | A_23_P83175   | PTPLAD2    | 4.033631622 | 1.06E-09    | down |
| 2307 | A_32_P157208  | LOC572558  | 4.026024635 | 0.0000218   | down |
| 2308 | A_24_P15898   | C1orf145   | 4.018581292 | 0.000375218 | down |
| 2309 | A_23_P315364  | CXCL2      | 4.017333318 | 0.000000799 | down |
| 2310 | A_33_P3219939 | CUBN       | 4.014793356 | 0.011694014 | down |
| 2311 | A_32_P16258   | EXOC6B     | 4.002780486 | 0.000105864 | down |
| 2312 | A_32_P177040  | SPDYE5     | 4.000591252 | 0.000000472 | down |
| 2313 | A_23_P71379   | PSCA       | 3.993854108 | 0.0000012   | down |
| 2314 | A_23_P159775  | GABRE      | 3.9883      | 0.0000181   | down |
| 2315 | A_23_P151297  | TENC1      | 3.98552239  | 0.003197624 | down |
| 2316 | A_23_P85693   | GBP2       | 3.981792479 | 0.0000121   | down |
| 2317 | A_24_P30923   | SNN        | 3.979707317 | 0.00000327  | down |
| 2318 | A_23_P167096  | VEGFC      | 3.979261381 | 0.001348706 | down |
| 2319 | A_24_P71938   | SMAD1      | 3.972239655 | 0.000000792 | down |
| 2320 | A_23_P112004  | LRRC6      | 3.969101621 | 0.00000852  | down |
| 2321 | A_23_P204640  | NANOG      | 3.967590598 | 0.000000214 | down |
| 2322 | A_23_P44505   | KLF11      | 3.965317355 | 0.00000562  | down |
| 2323 | A_33_P3302453 | NCRNA00242 | 3.963306477 | 0.00000146  | down |
| 2324 | A_32_P117170  | NAPEPLD    | 3.96159299  | 0.00000125  | down |
| 2325 | A_24_P194886  | EHBP1      | 3.958319502 | 0.000418563 | down |
| 2326 | A_23_P334883  | SHANK2     | 3.95810678  | 0.00000159  | down |
| 2327 | A_23_P145024  | ADRB2      | 3.949427029 | 0.00000936  | down |
| 2328 | A_23_P158277  | TMCO4      | 3.939934102 | 0.0000134   | down |
| 2329 | A_23_P35349   | SVIL       | 3.939009783 | 0.000591175 | down |
| 2330 | A_23_P212800  | FGF5       | 3.932218983 | 0.0000863   | down |
| 2331 | A_33_P3242543 | MAOA       | 3.931697064 | 0.000150021 | down |
| 2332 | A_24_P732099  | HBBP1      | 3.92467149  | 0.000000799 | down |
| 2333 | A_23_P425967  | SPDYE1     | 3.922235516 | 0.000177803 | down |
| 2334 | A_23_P68031   | STAT4      | 3.917043093 | 0.0000206   | down |
| 2335 | A_23_P109452  | CHEK2      | 3.910242731 | 0.00000989  | down |
| 2336 | A_23_P156445  | DDX43      | 3.907947177 | 0.000382095 | down |
| 2337 | A_33_P3387766 | LOC284276  | 3.899543739 | 0.0000159   | down |
| 2338 | A_23_P211212  | COL18A1    | 3.898654117 | 0.0000251   | down |
| 2339 | A_33_P3613516 | LOC254057  | 3.895639741 | 0.000039    | down |
| 2340 | A_23_P88331   | DLGAP5     | 3.886408185 | 0.0000763   | down |
| 2341 | A_33_P3293869 | TIAL1      | 3.884347215 | 0.000504389 | down |
| 2342 | A_33_P3403576 | FCGR2A     | 3.88367659  | 0.0000152   | down |

|      |               |             |             |             |      |
|------|---------------|-------------|-------------|-------------|------|
| 2343 | A_23_P117298  | F7          | 3.882628034 | 0.00000188  | down |
| 2344 | A_32_P129419  | NARG2       | 3.882451314 | 0.000054    | down |
| 2345 | A_24_P655849  | SMAD9       | 3.881210462 | 0.000504263 | down |
| 2346 | A_23_P18798   | PCDHB9      | 3.877963703 | 0.0000289   | down |
| 2347 | A_23_P29684   | VILL        | 3.870971896 | 0.00000148  | down |
| 2348 | A_33_P3211633 | WDR3        | 3.8597136   | 0.043364145 | down |
| 2349 | A_33_P3320062 | PLD1        | 3.855957811 | 0.00000368  | down |
| 2350 | A_33_P3261828 | LOC390660   | 3.852825912 | 0.0000111   | down |
| 2351 | A_24_P365807  | EFNB1       | 3.852448934 | 0.000000384 | down |
| 2352 | A_33_P3369567 | LSP1        | 3.850690044 | 0.0000014   | down |
| 2353 | A_23_P398566  | NR4A3       | 3.850219333 | 0.000329304 | down |
| 2354 | A_24_P313993  | CAPS        | 3.84914975  | 0.018941074 | down |
| 2355 | A_23_P308136  | TRIM50      | 3.847325875 | 0.002622768 | down |
| 2356 | A_24_P51080   | FLJ42709    | 3.843220718 | 0.00000179  | down |
| 2357 | A_33_P3404052 | TNFAIP8     | 3.841908962 | 0.00000948  | down |
| 2358 | A_33_P3343101 | ARGLU1      | 3.839196758 | 0.001611203 | down |
| 2359 | A_23_P77908   | SLC47A2     | 3.830294798 | 0.036146    | down |
| 2360 | A_24_P90097   | ADD3        | 3.828325945 | 0.00000342  | down |
| 2361 | A_33_P3323760 | LOC153684   | 3.828034061 | 0.00000046  | down |
| 2362 | A_33_P3239242 | SPATA6      | 3.826747029 | 0.00000819  | down |
| 2363 | A_33_P3220919 | ADRBK2      | 3.821877843 | 0.0000283   | down |
| 2364 | A_32_P88120   | YPEL1       | 3.81530837  | 0.0000315   | down |
| 2365 | A_23_P46369   | RAB13       | 3.811229979 | 0.005068212 | down |
| 2366 | A_23_P138680  | IL15RA      | 3.807914713 | 3.35E-09    | down |
| 2367 | A_33_P3293346 | KCTD3       | 3.807557965 | 0.008608234 | down |
| 2368 | A_24_P10233   | DAPK2       | 3.805268797 | 0.000107904 | down |
| 2369 | A_24_P135769  | VWA5A       | 3.805140963 | 0.0000376   | down |
| 2370 | A_24_P85557   | GPR37       | 3.802781112 | 0.00000533  | down |
| 2371 | A_33_P3305203 | LOC283588   | 3.795288351 | 0.0000025   | down |
| 2372 | A_23_P117852  | KIAA0101    | 3.794180464 | 0.00000029  | down |
| 2373 | A_33_P3392517 | LBX2        | 3.789159142 | 0.000000444 | down |
| 2374 | A_23_P144096  | CISH        | 3.788322974 | 0.00000354  | down |
| 2375 | A_32_P199429  | NCAM2       | 3.781998174 | 0.000000862 | down |
| 2376 | A_33_P3327587 | LOC10012790 | 3.780991746 | 0.0000745   | down |
| 2377 | A_23_P10121   | SFRP1       | 3.780329096 | 0.00000388  | down |
| 2378 | A_33_P3306159 | TNRC18      | 3.779774064 | 0.0372303   | down |
| 2379 | A_24_P353619  | ALPL        | 3.77604197  | 0.006874385 | down |
| 2380 | A_23_P80594   | PLCL2       | 3.775649911 | 0.00000135  | down |
| 2381 | A_23_P87560   | BTG1        | 3.773228579 | 0.0000583   | down |
| 2382 | A_23_P109488  | PIK3IP1     | 3.770194886 | 0.002049763 | down |
| 2383 | A_23_P404606  | C5orf41     | 3.767157452 | 0.000139262 | down |
| 2384 | A_24_P307653  | SLC6A15     | 3.765843206 | 0.00000475  | down |
| 2385 | A_23_P17663   | MX1         | 3.761351153 | 0.000168962 | down |
| 2386 | A_33_P3421183 | GTF2I       | 3.760901356 | 0.000000739 | down |
| 2387 | A_33_P3294509 | CD44        | 3.754024329 | 0.000000288 | down |
| 2388 | A_33_P3279353 | AZU1        | 3.746237937 | 0.0000362   | down |
| 2389 | A_23_P327777  | GATS        | 3.744494663 | 0.000014    | down |
| 2390 | A_33_P3504659 | CASP10      | 3.744037366 | 0.000237827 | down |
| 2391 | A_24_P135748  | GRTP1       | 3.739657987 | 0.000129627 | down |
| 2392 | A_23_P388855  | KAT6B       | 3.738150101 | 0.000425234 | down |
| 2393 | A_33_P3544880 | LOC142937   | 3.73715232  | 0.000078    | down |



|      |               |           |             |             |      |
|------|---------------|-----------|-------------|-------------|------|
| 2394 | A_33_P3311498 | LOC283392 | 3.727380241 | 0.000000754 | down |
| 2395 | A_23_P67569   | LPPR3     | 3.726693232 | 0.00019772  | down |
| 2396 | A_33_P3303212 | CCDC74B   | 3.725128605 | 0.012631028 | down |
| 2397 | A_33_P3396089 | SLC38A6   | 3.723892776 | 0.00000782  | down |
| 2398 | A_23_P137665  | CHI3L1    | 3.718673282 | 0.0000291   | down |
| 2399 | A_33_P3210203 | SPIRE2    | 3.71785997  | 0.0000067   | down |
| 2400 | A_24_P204043  | ZNF318    | 3.712846917 | 0.000218737 | down |
| 2401 | A_23_P67971   | GALM      | 3.709576519 | 0.000000912 | down |
| 2402 | A_33_P3312544 | GABRB1    | 3.704253074 | 0.00000074  | down |
| 2403 | A_23_P111583  | CD36      | 3.703275464 | 0.000117081 | down |
| 2404 | A_33_P3220475 | FLJ23867  | 3.702621728 | 0.000000382 | down |
| 2405 | A_24_P54174   | TNFRSF1B  | 3.696920621 | 0.0000361   | down |
| 2406 | A_32_P116660  | RBM43     | 3.696460935 | 0.00000989  | down |
| 2407 | A_23_P129246  | PLEKHO2   | 3.695108772 | 0.000000301 | down |
| 2408 | A_23_P169437  | LCN2      | 3.690587    | 0.008408218 | down |
| 2409 | A_33_P3309075 | TBC1D8    | 3.685640101 | 0.0000041   | down |
| 2410 | A_23_P8981    | STAR      | 3.684493053 | 0.00000263  | down |
| 2411 | A_23_P109034  | SDC4      | 3.683475976 | 0.00000499  | down |
| 2412 | A_33_P3224362 | PCBP3     | 3.680890076 | 0.001125116 | down |
| 2413 | A_24_P185117  | RILP      | 3.665600854 | 0.000000194 | down |
| 2414 | A_23_P436284  | OSTBETA   | 3.658688948 | 0.0000653   | down |
| 2415 | A_33_P3216933 | SIK2      | 3.651894278 | 0.000033    | down |
| 2416 | A_23_P391228  | MANEAL    | 3.642667299 | 0.00000296  | down |
| 2417 | A_23_P214026  | FBN2      | 3.638870392 | 0.00000418  | down |
| 2418 | A_23_P25605   | KBTBD7    | 3.63798182  | 0.000964795 | down |
| 2419 | A_23_P23611   | AMY1C     | 3.632401307 | 0.000130944 | down |
| 2420 | A_23_P205746  | EML1      | 3.630534594 | 0.000000648 | down |
| 2421 | A_33_P3329013 | SSTR2     | 3.625748527 | 0.000446227 | down |
| 2422 | A_23_P218190  | CAPN3     | 3.625696504 | 0.00000328  | down |
| 2423 | A_32_P194312  | SDK2      | 3.622668513 | 0.000260983 | down |
| 2424 | A_23_P204016  | CACNB3    | 3.619481394 | 0.000163378 | down |
| 2425 | A_32_P126375  | NHS       | 3.612757701 | 0.0000227   | down |
| 2426 | A_33_P3378514 | PDE5A     | 3.611289302 | 0.000000967 | down |
| 2427 | A_23_P133359  | ZFP2      | 3.608175386 | 0.000000419 | down |
| 2428 | A_24_P357266  | GRPR      | 3.604276106 | 0.001517241 | down |
| 2429 | A_23_P38346   | DHX58     | 3.599329052 | 0.0000116   | down |
| 2430 | A_24_P16610   | ZNRF1     | 3.597123852 | 0.000000114 | down |
| 2431 | A_24_P406006  | LPCAT1    | 3.595816334 | 0.000208474 | down |
| 2432 | A_24_P16913   | ABCC4     | 3.593828174 | 0.00000055  | down |
| 2433 | A_23_P17593   | CDH4      | 3.591963857 | 0.00071367  | down |
| 2434 | A_32_P71113   | SCAI      | 3.591036541 | 0.000000094 | down |
| 2435 | A_23_P212241  | CHL1      | 3.590924449 | 0.000000186 | down |
| 2436 | A_23_P340848  | PTGIR     | 3.58701091  | 0.000804789 | down |
| 2437 | A_23_P316511  | HOXB3     | 3.583682104 | 0.0000439   | down |
| 2438 | A_23_P128574  | ENOX1     | 3.577298485 | 0.00003     | down |
| 2439 | A_33_P3350094 | PATL2     | 3.576816733 | 0.000114975 | down |
| 2440 | A_23_P72059   | VSIG10    | 3.571738353 | 0.0000365   | down |
| 2441 | A_23_P250564  | PRKCE     | 3.568284551 | 0.00000224  | down |
| 2442 | A_23_P151820  | RIN3      | 3.568006722 | 0.001283284 | down |
| 2443 | A_23_P150609  | IGF2      | 3.560632813 | 0.000000721 | down |
| 2444 | A_23_P254254  | SGSH      | 3.559848884 | 0.00000274  | down |

|      |               |             |             |             |      |
|------|---------------|-------------|-------------|-------------|------|
| 2445 | A_33_P3319134 | LOC10050619 | 3.557665735 | 0.0000261   | down |
| 2446 | A_23_P160992  | FMO4        | 3.553339576 | 0.0000811   | down |
| 2447 | A_33_P3571901 | DKFZP586K15 | 3.549789804 | 0.00000266  | down |
| 2448 | A_33_P3412016 | SEMA4B      | 3.540590762 | 0.022138343 | down |
| 2449 | A_23_P111000  | PSMB9       | 3.538667885 | 0.0000109   | down |
| 2450 | A_23_P14769   | FES         | 3.537373034 | 0.0000268   | down |
| 2451 | A_33_P3375145 | C9orf150    | 3.532407216 | 0.00000272  | down |
| 2452 | A_23_P31124   | COL21A1     | 3.531527506 | 0.000106429 | down |
| 2453 | A_23_P125082  | IRF2        | 3.52777602  | 0.001559294 | down |
| 2454 | A_33_P3287223 | DPP4        | 3.526988406 | 0.000000228 | down |
| 2455 | A_24_P941912  | DTX3L       | 3.525116246 | 0.0000168   | down |
| 2456 | A_23_P168669  | CROT        | 3.523087647 | 0.0000417   | down |
| 2457 | A_23_P216023  | ANGPT1      | 3.522278537 | 0.0000187   | down |
| 2458 | A_23_P208143  | ZNF397      | 3.519959021 | 0.0000123   | down |
| 2459 | A_23_P405873  | C9orf72     | 3.518773454 | 0.004930729 | down |
| 2460 | A_24_P391586  | OAF         | 3.517533102 | 0.00146717  | down |
| 2461 | A_33_P3442605 | LOC389641   | 3.50098529  | 0.000134506 | down |
| 2462 | A_32_P453321  | C1orf228    | 3.49236222  | 0.00000202  | down |
| 2463 | A_23_P427122  | ART5        | 3.490872907 | 0.0000113   | down |
| 2464 | A_24_P234732  | MXD4        | 3.490685306 | 0.029482975 | down |
| 2465 | A_23_P153853  | ECH1        | 3.489493151 | 0.0000323   | down |
| 2466 | A_33_P3797403 | LOC283387   | 3.485095202 | 0.0000373   | down |
| 2467 | A_23_P134176  | SOD2        | 3.484029082 | 0.0000239   | down |
| 2468 | A_23_P66635   | CCL11       | 3.482493194 | 0.000000745 | down |
| 2469 | A_23_P385105  | PLCD4       | 3.47951799  | 0.00000161  | down |
| 2470 | A_23_P204630  | NTN4        | 3.474309632 | 0.00000165  | down |
| 2471 | A_32_P94001   | FAM92A3     | 3.472794397 | 0.000115522 | down |
| 2472 | A_23_P30294   | CDO1        | 3.457945905 | 0.00000115  | down |
| 2473 | A_23_P212508  | TF          | 3.456819162 | 0.00000415  | down |
| 2474 | A_32_P47988   | CAMK2D      | 3.454949923 | 0.000119768 | down |
| 2475 | A_24_P322229  | RASL10B     | 3.451613678 | 0.0000198   | down |
| 2476 | A_23_P42306   | HLA-DMA     | 3.450244656 | 0.0000921   | down |
| 2477 | A_23_P377214  | HEXIM2      | 3.447428587 | 0.000025    | down |
| 2478 | A_33_P3531206 | PCOTH       | 3.445065629 | 0.0000417   | down |
| 2479 | A_33_P3419865 | LOC646719   | 3.438574651 | 0.001167205 | down |
| 2480 | A_23_P301855  | LSAMP       | 3.435905918 | 0.000000247 | down |
| 2481 | A_24_P134356  | BTBD3       | 3.427425562 | 0.0000477   | down |
| 2482 | A_23_P148047  | PTGER4      | 3.427238678 | 0.00000291  | down |
| 2483 | A_23_P114947  | RGS2        | 3.426566454 | 0.0000351   | down |
| 2484 | A_33_P3342598 | PRKG2       | 3.414197147 | 0.000000605 | down |
| 2485 | A_23_P34093   | G6PD        | 3.413347743 | 0.024429266 | down |
| 2486 | A_23_P169039  | SNAI2       | 3.41256218  | 0.00005     | down |
| 2487 | A_23_P24077   | C10orf54    | 3.411555453 | 0.00000615  | down |
| 2488 | A_24_P217365  | ANKRD28     | 3.404878143 | 0.00000404  | down |
| 2489 | A_24_P356916  | SLC13A3     | 3.404817962 | 0.00000228  | down |
| 2490 | A_24_P82493   | DCAKD       | 3.404153282 | 0.00000768  | down |
| 2491 | A_23_P90804   | MAP4K4      | 3.398198985 | 0.000000568 | down |
| 2492 | A_23_P143774  | MOV10L1     | 3.395820183 | 0.00000145  | down |
| 2493 | A_23_P142878  | ATOH8       | 3.393590765 | 0.0000164   | down |
| 2494 | A_33_P3289865 | PLCL1       | 3.392738963 | 0.00000651  | down |
| 2495 | A_23_P404965  | GNL1        | 3.392223751 | 0.00000158  | down |

|      |               |           |             |             |      |
|------|---------------|-----------|-------------|-------------|------|
| 2496 | A_23_P131263  | MPP4      | 3.391079327 | 0.00000537  | down |
| 2497 | A_32_P216734  | SPDYE3    | 3.390558414 | 0.0000981   | down |
| 2498 | A_23_P59714   | MGC16142  | 3.390145751 | 0.000265162 | down |
| 2499 | A_23_P31064   | MOXD1     | 3.38994688  | 0.00000238  | down |
| 2500 | A_33_P3418833 | FLRT3     | 3.382112853 | 0.0000055   | down |
| 2501 | A_33_P3220470 | SMAD6     | 3.381783182 | 0.000000328 | down |
| 2502 | A_23_P64617   | FZD4      | 3.377698759 | 0.00000539  | down |
| 2503 | A_33_P3243023 | ADRA1D    | 3.369535596 | 0.00000432  | down |
| 2504 | A_23_P422071  | B3GALT4   | 3.368398125 | 0.000144566 | down |
| 2505 | A_23_P129128  | TARSL2    | 3.366773499 | 0.00000793  | down |
| 2506 | A_23_P88880   | ZNF423    | 3.366722937 | 0.0000576   | down |
| 2507 | A_23_P58506   | ELL2      | 3.364908636 | 0.0000105   | down |
| 2508 | A_23_P131866  | AURKA     | 3.36445774  | 0.000000052 | down |
| 2509 | A_32_P196263  | ADAMTS9   | 3.362880391 | 0.0000192   | down |
| 2510 | A_23_P93383   | RGL2      | 3.362245727 | 0.000248675 | down |
| 2511 | A_33_P3605529 | LOC400548 | 3.359854055 | 0.048571921 | down |
| 2512 | A_33_P3222977 | TEKT5     | 3.359124731 | 0.000958606 | down |
| 2513 | A_23_P323272  | OSR1      | 3.351971773 | 0.001136832 | down |
| 2514 | A_24_P42446   | PURG      | 3.350890013 | 0.0000047   | down |
| 2515 | A_23_P60146   | PDGFRL    | 3.348584405 | 0.00000583  | down |
| 2516 | A_23_P411806  | SLC44A1   | 3.348327551 | 0.0000665   | down |
| 2517 | A_24_P102880  | NAV1      | 3.342120305 | 0.00000248  | down |
| 2518 | A_23_P99253   | LIN7A     | 3.340416277 | 0.000049    | down |
| 2519 | A_23_P412577  | ANKRD29   | 3.335358568 | 0.0000293   | down |
| 2520 | A_33_P3247205 | MOSC1     | 3.333987742 | 0.00000599  | down |
| 2521 | A_23_P1331    | COL13A1   | 3.333873429 | 0.00000338  | down |
| 2522 | A_33_P3234472 | LOC284751 | 3.333670773 | 0.00000118  | down |
| 2523 | A_33_P3317523 | STMN1     | 3.333242623 | 0.0000119   | down |
| 2524 | A_33_P3404989 | HIST1H3H  | 3.332585448 | 0.000024    | down |
| 2525 | A_23_P204208  | KLRD1     | 3.331788911 | 0.0000986   | down |
| 2526 | A_23_P84576   | ANTXR1    | 3.330639788 | 0.000126625 | down |
| 2527 | A_33_P3316278 | ABCC6P1   | 3.329617532 | 0.0000114   | down |
| 2528 | A_33_P3413989 | SERPING1  | 3.328948996 | 0.009420596 | down |
| 2529 | A_24_P102293  | SLITRK5   | 3.327278282 | 0.0000126   | down |
| 2530 | A_23_P356526  | TRIM5     | 3.326026354 | 0.0000013   | down |
| 2531 | A_24_P23625   | HS3ST3B1  | 3.321289928 | 0.0000325   | down |
| 2532 | A_24_P410797  | KALRN     | 3.320974549 | 3.62E-09    | down |
| 2533 | A_33_P3232354 | BTBD8     | 3.319403244 | 0.00000172  | down |
| 2534 | A_23_P253464  | FAM175A   | 3.319123168 | 0.000000987 | down |
| 2535 | A_23_P2203    | TAOK3     | 3.318719123 | 0.000094    | down |
| 2536 | A_33_P3252695 | CYTL1     | 3.318510487 | 0.0000242   | down |
| 2537 | A_23_P111041  | HIST1H2BI | 3.317947365 | 0.00000624  | down |
| 2538 | A_24_P943301  | PEAR1     | 3.31679313  | 0.0000341   | down |
| 2539 | A_23_P122976  | GNAI1     | 3.316548599 | 0.0000204   | down |
| 2540 | A_23_P29422   | GYG1      | 3.31457983  | 0.000100408 | down |
| 2541 | A_23_P53126   | LMO2      | 3.313561279 | 0.0000321   | down |
| 2542 | A_33_P3400763 | PLIN4     | 3.30843339  | 0.00000639  | down |
| 2543 | A_23_P303833  | SCN4B     | 3.303915906 | 0.00000195  | down |
| 2544 | A_33_P3325497 | FIBIN     | 3.302872167 | 0.00000941  | down |
| 2545 | A_24_P157087  | CASP8     | 3.294257128 | 0.000075    | down |
| 2546 | A_33_P3226542 | SNORD3B-1 | 3.288715024 | 0.0000764   | down |

|      |               |           |             |             |      |
|------|---------------|-----------|-------------|-------------|------|
| 2547 | A_33_P3844650 | ANGPTL2   | 3.286652665 | 0.00000231  | down |
| 2548 | A_23_P69383   | PARP9     | 3.286384616 | 0.000150108 | down |
| 2549 | A_23_P67042   | MOCOS     | 3.285295937 | 0.000024    | down |
| 2550 | A_33_P3393927 | MTMR11    | 3.284582266 | 0.00030285  | down |
| 2551 | A_23_P94754   | TNFSF15   | 3.283823682 | 0.0000707   | down |
| 2552 | A_23_P347777  | SYCP2L    | 3.282745332 | 0.000102791 | down |
| 2553 | A_32_P827528  | S1PR2     | 3.281696149 | 0.000000751 | down |
| 2554 | A_32_P75264   | TMEM26    | 3.279182737 | 0.00000672  | down |
| 2555 | A_33_P3357530 | SLC12A7   | 3.279022194 | 0.0000177   | down |
| 2556 | A_24_P27229   | CSAD      | 3.277229788 | 0.004139465 | down |
| 2557 | A_24_P153576  | SHPRH     | 3.275500192 | 0.000208166 | down |
| 2558 | A_33_P3364062 | FLJ31356  | 3.274995445 | 0.000666997 | down |
| 2559 | A_23_P383325  | CCDC110   | 3.272950235 | 0.0000837   | down |
| 2560 | A_23_P165414  | KLHL23    | 3.272005107 | 0.00000965  | down |
| 2561 | A_24_P390668  | FMNL1     | 3.268615854 | 0.001609691 | down |
| 2562 | A_24_P330518  | CA12      | 3.265812959 | 0.00000431  | down |
| 2563 | A_33_P3281686 | TSC2      | 3.263318949 | 0.000985237 | down |
| 2564 | A_23_P71821   | PBX3      | 3.261287587 | 0.00000725  | down |
| 2565 | A_32_P160561  | DOK6      | 3.260815166 | 0.00000711  | down |
| 2566 | A_32_P197561  | EBF1      | 3.257422527 | 0.0000284   | down |
| 2567 | A_32_P62997   | PBK       | 3.254461017 | 0.00015048  | down |
| 2568 | A_23_P303978  | LOC285943 | 3.253331122 | 0.0000133   | down |
| 2569 | A_23_P80503   | ROBO1     | 3.249645399 | 0.0000028   | down |
| 2570 | A_24_P71649   | CNTN3     | 3.247931036 | 0.0000147   | down |
| 2571 | A_24_P254949  | PGM5      | 3.247870102 | 0.00000258  | down |
| 2572 | A_23_P322233  | KLF4      | 3.247196447 | 0.000000253 | down |
| 2573 | A_24_P3783    | HIST1H2BM | 3.246966875 | 0.00000154  | down |
| 2574 | A_23_P124946  | CMYA5     | 3.246344712 | 0.002514885 | down |
| 2575 | A_33_P3376214 | FMO5      | 3.242290819 | 1.99E-08    | down |
| 2576 | A_23_P209564  | CYBRD1    | 3.241396483 | 0.0000275   | down |
| 2577 | A_23_P50108   | NDC80     | 3.235638427 | 0.00000379  | down |
| 2578 | A_32_P141418  | ARMC4     | 3.231948031 | 0.0000264   | down |
| 2579 | A_33_P3350488 | NUSAP1    | 3.231846849 | 0.00000267  | down |
| 2580 | A_33_P3233436 | PNMA6C    | 3.230157027 | 0.000665359 | down |
| 2581 | A_23_P390172  | RNASEL    | 3.229377286 | 0.00000969  | down |
| 2582 | A_23_P29922   | TLR3      | 3.227806437 | 0.00000457  | down |
| 2583 | A_33_P3226775 | MUC20     | 3.223662181 | 0.0000367   | down |
| 2584 | A_23_P3532    | LITAF     | 3.222905752 | 0.00000615  | down |
| 2585 | A_33_P3393170 | CAPN5     | 3.222164911 | 0.00000162  | down |
| 2586 | A_23_P95231   | CASC1     | 3.221476938 | 0.000426474 | down |
| 2587 | A_33_P3393821 | C1R       | 3.221091552 | 0.00000211  | down |
| 2588 | A_23_P140290  | RTN1      | 3.218964947 | 0.005617786 | down |
| 2589 | A_32_P202182  | SPDYE8P   | 3.218673415 | 0.0000315   | down |
| 2590 | A_23_P35912   | CASP4     | 3.216127273 | 0.0000535   | down |
| 2591 | A_24_P942211  | SLC35E2   | 3.212746165 | 0.00000627  | down |
| 2592 | A_23_P1962    | RARRES3   | 3.210184019 | 0.000000935 | down |
| 2593 | A_33_P3257140 | ROCK2     | 3.209702611 | 1.64E-08    | down |
| 2594 | A_33_P3371493 | TOP1      | 3.208879023 | 0.001019196 | down |
| 2595 | A_23_P23947   | MAP3K8    | 3.207952693 | 0.00000545  | down |
| 2596 | A_23_P85598   | ADCK3     | 3.205783654 | 0.0000987   | down |
| 2597 | A_23_P348383  | CC2D2A    | 3.205187303 | 0.0000493   | down |

|      |               |             |             |             |      |
|------|---------------|-------------|-------------|-------------|------|
| 2598 | A_33_P3234809 | PAX8        | 3.200904054 | 0.000130191 | down |
| 2599 | A_33_P3324137 | PRO0628     | 3.197124665 | 0.000761069 | down |
| 2600 | A_23_P134295  | NUDT1       | 3.195119743 | 0.000000997 | down |
| 2601 | A_23_P6381    | MN1         | 3.193782352 | 0.000775139 | down |
| 2602 | A_33_P3354539 | CHURC1      | 3.192300951 | 0.0000186   | down |
| 2603 | A_23_P151614  | PSME1       | 3.185920647 | 0.0000504   | down |
| 2604 | A_23_P384329  | DENND4A     | 3.183641233 | 2.03E-09    | down |
| 2605 | A_23_P116235  | MDK         | 3.181517741 | 0.000000735 | down |
| 2606 | A_33_P3234571 | MAP2K3      | 3.180143279 | 0.018689391 | down |
| 2607 | A_23_P158318  | ROR2        | 3.173407227 | 0.0000129   | down |
| 2608 | A_23_P17471   | FAM113A     | 3.172809788 | 0.000445805 | down |
| 2609 | A_23_P317465  | RAB8B       | 3.169519916 | 0.000000745 | down |
| 2610 | A_23_P47304   | CASP5       | 3.169337575 | 0.00000767  | down |
| 2611 | A_23_P426636  | AHNAK       | 3.168772311 | 0.014391979 | down |
| 2612 | A_33_P3367247 | CNTLN       | 3.166380355 | 0.00000826  | down |
| 2613 | A_23_P218807  | ZC3H7B      | 3.164634021 | 0.00000425  | down |
| 2614 | A_24_P944049  | CEP68       | 3.163976753 | 0.0000798   | down |
| 2615 | A_33_P3308347 | ADAMTS8     | 3.163897437 | 0.000000557 | down |
| 2616 | A_23_P316612  | GLIS1       | 3.162686011 | 0.00000551  | down |
| 2617 | A_33_P3679941 | LOC283484   | 3.159751643 | 0.000161731 | down |
| 2618 | A_32_P137266  | EFCAB7      | 3.157663273 | 0.00000062  | down |
| 2619 | A_23_P152002  | BCL2A1      | 3.155435937 | 0.00176462  | down |
| 2620 | A_24_P146211  | HIST1H2BD   | 3.152723176 | 2.28E-08    | down |
| 2621 | A_33_P3351120 | TXNRD1      | 3.150983792 | 0.0000363   | down |
| 2622 | A_23_P147397  | DYNC2H1     | 3.150048046 | 0.00000719  | down |
| 2623 | A_23_P368740  | HDAC10      | 3.143207176 | 0.007527913 | down |
| 2624 | A_33_P3282840 | RPS29       | 3.141638827 | 0.0000021   | down |
| 2625 | A_23_P413641  | PREX1       | 3.137329013 | 0.000163904 | down |
| 2626 | A_24_P829183  | FLJ32255    | 3.137045237 | 0.00000136  | down |
| 2627 | A_23_P70670   | CD83        | 3.136602046 | 0.00028147  | down |
| 2628 | A_33_P3367899 | FRAT1       | 3.134183538 | 0.0000294   | down |
| 2629 | A_23_P132718  | SEMA3B      | 3.132848852 | 0.00000463  | down |
| 2630 | A_33_P3410351 | GSTM2       | 3.132417833 | 0.0000939   | down |
| 2631 | A_33_P3237150 | BMP2        | 3.131203774 | 0.00000153  | down |
| 2632 | A_24_P381136  | PACSIN3     | 3.126289253 | 0.01092921  | down |
| 2633 | A_33_P3209229 | RAB26       | 3.12569859  | 0.000000832 | down |
| 2634 | A_23_P401     | CENPF       | 3.124993091 | 0.0000805   | down |
| 2635 | A_33_P3220837 | MAFB        | 3.122399492 | 0.000134112 | down |
| 2636 | A_24_P945228  | CYP4V2      | 3.121638191 | 0.00000642  | down |
| 2637 | A_33_P3753757 | LOC158402   | 3.121562821 | 0.001596799 | down |
| 2638 | A_23_P65022   | ACADS       | 3.118113478 | 0.021464401 | down |
| 2639 | A_33_P3396886 | C11orf52    | 3.117889646 | 0.00000385  | down |
| 2640 | A_23_P163195  | LRFN5       | 3.117241511 | 0.0000223   | down |
| 2641 | A_33_P3359856 | MZT2A       | 3.115172169 | 0.000000884 | down |
| 2642 | A_33_P3345304 | LOC10051019 | 3.113624571 | 0.0000476   | down |
| 2643 | A_24_P388786  | DNAH5       | 3.112454327 | 0.0000088   | down |
| 2644 | A_33_P3645465 | LOC282997   | 3.108822685 | 0.0000213   | down |
| 2645 | A_24_P345846  | ANTXR2      | 3.10494038  | 0.031278191 | down |
| 2646 | A_33_P3297444 | ABTB1       | 3.098020448 | 0.00000136  | down |
| 2647 | A_23_P7144    | CXCL1       | 3.097686548 | 0.000291358 | down |
| 2648 | A_32_P96036   | MEX3A       | 3.097357336 | 0.00000661  | down |

|      |               |              |             |             |      |
|------|---------------|--------------|-------------|-------------|------|
| 2649 | A_23_P62298   | NLGN3        | 3.085831386 | 0.01141575  | down |
| 2650 | A_32_P34387   | SPATA7       | 3.084286962 | 0.000104234 | down |
| 2651 | A_24_P228875  | ARHGEF6      | 3.083210664 | 0.000000179 | down |
| 2652 | A_33_P3220976 | EFHB         | 3.080508821 | 0.002777659 | down |
| 2653 | A_24_P944640  | EPB41L5      | 3.079466641 | 0.0000184   | down |
| 2654 | A_23_P111804  | PARP12       | 3.078275523 | 0.00000297  | down |
| 2655 | A_23_P358917  | CYP3A7       | 3.07669692  | 0.00000335  | down |
| 2656 | A_24_P49183   | EXD3         | 3.076677869 | 0.003466451 | down |
| 2657 | A_23_P416894  | PION         | 3.076070354 | 0.0000297   | down |
| 2658 | A_32_P205241  | GJA3         | 3.076004613 | 0.0000525   | down |
| 2659 | A_23_P401361  | PITPNM2      | 3.07487856  | 0.001331896 | down |
| 2660 | A_32_P204205  | SIX4         | 3.071831681 | 0.0000562   | down |
| 2661 | A_33_P3349466 | ANKRD12      | 3.070731349 | 8.59E-08    | down |
| 2662 | A_23_P207445  | MAP2K6       | 3.069872136 | 0.000025    | down |
| 2663 | A_33_P3296871 | ZNF33B       | 3.069639001 | 0.0000458   | down |
| 2664 | A_24_P649388  | C21orf63     | 3.068721314 | 0.0000165   | down |
| 2665 | A_33_P3351027 | PEX2         | 3.065650999 | 0.000012    | down |
| 2666 | A_24_P16124   | IFITM4P      | 3.063068577 | 0.0000138   | down |
| 2667 | A_23_P47034   | HHEX         | 3.061456109 | 0.00000616  | down |
| 2668 | A_23_P98686   | ATHL1        | 3.060532454 | 0.0000252   | down |
| 2669 | A_24_P294851  | TRIM38       | 3.059926218 | 0.00000188  | down |
| 2670 | A_23_P383009  | IGFBP5       | 3.05630813  | 0.00000687  | down |
| 2671 | A_32_P30831   | LOC100505643 | 3.055973006 | 0.000235038 | down |
| 2672 | A_23_P91910   | PLSCR4       | 3.055514513 | 0.0000103   | down |
| 2673 | A_23_P209288  | CUL3         | 3.054799092 | 0.00000141  | down |
| 2674 | A_33_P3655775 | LOC284630    | 3.052943732 | 0.0000037   | down |
| 2675 | A_33_P3257678 | HIST2H3A     | 3.048623238 | 0.000227841 | down |
| 2676 | A_24_P602871  | SAMD5        | 3.047592479 | 0.0000196   | down |
| 2677 | A_23_P108501  | EPHA4        | 3.038776705 | 0.001048274 | down |
| 2678 | A_33_P3354414 | AOX1         | 3.037139833 | 0.0000474   | down |
| 2679 | A_33_P3288942 | FAM107B      | 3.036933813 | 0.007430651 | down |
| 2680 | A_23_P428842  | TMEM44       | 3.035771421 | 0.0000109   | down |
| 2681 | A_23_P22682   | ARMCX1       | 3.026602058 | 0.000000513 | down |
| 2682 | A_23_P250982  | ISOC1        | 3.024838953 | 0.0000444   | down |
| 2683 | A_24_P930418  | RBPMS        | 3.023707249 | 0.0000129   | down |
| 2684 | A_23_P100660  | SERPINF1     | 3.023401686 | 9.86E-08    | down |
| 2685 | A_23_P86079   | LOC441869    | 3.022108659 | 0.001492955 | down |
| 2686 | A_23_P252764  | SMARCA2      | 3.021232057 | 0.011803175 | down |
| 2687 | A_23_P137035  | PIR          | 3.019956635 | 0.0000416   | down |
| 2688 | A_24_P53976   | GLUL         | 3.019864881 | 0.0000432   | down |
| 2689 | A_23_P101407  | C3           | 3.018693399 | 0.00000915  | down |
| 2690 | A_23_P3681    | NETO2        | 3.01619562  | 0.0000292   | down |
| 2691 | A_24_P520767  | LOC100505803 | 3.015278096 | 0.000229544 | down |
| 2692 | A_23_P93690   | MCM7         | 3.014033948 | 0.00000885  | down |
| 2693 | A_23_P15402   | SAT2         | 3.012365164 | 0.000000144 | down |
| 2694 | A_24_P923102  | PHOSPHO2-K   | 3.011780647 | 0.0000244   | down |
| 2695 | A_23_P202837  | CCND1        | 3.010814866 | 0.000231972 | down |
| 2696 | A_33_P3327106 | LOC100129901 | 3.010091968 | 0.00000729  | down |
| 2697 | A_23_P120002  | SP110        | 3.003186354 | 0.00000179  | down |
| 2698 | A_23_P151529  | C14orf132    | 3.003025378 | 0.000000191 | down |
| 2699 | A_23_P309950  | FAM178A      | 3.002178796 | 0.001915716 | down |

|      |               |             |             |             |      |
|------|---------------|-------------|-------------|-------------|------|
| 2700 | A_24_P414376  | KLF3        | 3.001473645 | 4.62E-08    | down |
| 2701 | A_33_P3294459 | COPG2IT1    | 2.999862758 | 0.000704082 | down |
| 2702 | A_23_P213562  | F2R         | 2.996737051 | 0.0000016   | down |
| 2703 | A_24_P323598  | ESCO2       | 2.994927612 | 0.002337954 | down |
| 2704 | A_24_P156049  | SLC39A6     | 2.993218644 | 0.00000292  | down |
| 2705 | A_23_P167401  | PCDHB11     | 2.990830188 | 0.00000391  | down |
| 2706 | A_32_P180315  | C9orf174    | 2.987637683 | 0.0000182   | down |
| 2707 | A_23_P427148  | PROCA1      | 2.984148851 | 0.00000129  | down |
| 2708 | A_23_P7397    | PCDHB10     | 2.981785889 | 0.000000221 | down |
| 2709 | A_23_P24384   | CCDC88B     | 2.981731945 | 0.00000291  | down |
| 2710 | A_32_P123629  | TTC39C      | 2.980084007 | 0.0000189   | down |
| 2711 | A_23_P7976    | HIST1H1E    | 2.979464656 | 0.00000915  | down |
| 2712 | A_23_P97123   | ANKRD36BP1  | 2.978219252 | 0.000366628 | down |
| 2713 | A_33_P3286218 | DLEU2L      | 2.977815424 | 0.00000696  | down |
| 2714 | A_23_P370682  | BATF2       | 2.97713498  | 0.000099    | down |
| 2715 | A_24_P376422  | LOC10028716 | 2.974766299 | 0.000000994 | down |
| 2716 | A_23_P210210  | EPAS1       | 2.973905903 | 0.00000225  | down |
| 2717 | A_32_P179740  | ATXN7L1     | 2.973402975 | 0.00000427  | down |
| 2718 | A_33_P3317392 | ADAMTS19    | 2.973112387 | 0.0000826   | down |
| 2719 | A_24_P298174  | CBX1        | 2.971694068 | 0.00674274  | down |
| 2720 | A_23_P43415   | HSD17B3     | 2.968279063 | 0.000166047 | down |
| 2721 | A_23_P423331  | NTNG2       | 2.967372893 | 0.0000431   | down |
| 2722 | A_33_P3262191 | CPNE7       | 2.96543346  | 0.000000299 | down |
| 2723 | A_23_P400078  | MTHFR       | 2.965359463 | 0.000000338 | down |
| 2724 | A_23_P39840   | VAMP5       | 2.960713722 | 0.00000226  | down |
| 2725 | A_24_P191781  | PARM1       | 2.960295375 | 0.0000262   | down |
| 2726 | A_23_P214080  | EGR1        | 2.953192364 | 0.000110519 | down |
| 2727 | A_23_P86532   | BICC1       | 2.95269328  | 0.0000383   | down |
| 2728 | A_23_P98350   | BIRC3       | 2.952303624 | 0.000016    | down |
| 2729 | A_23_P366216  | HIST1H2BH   | 2.949532556 | 0.000074    | down |
| 2730 | A_23_P165891  | TAF1B       | 2.948692403 | 0.00000383  | down |
| 2731 | A_24_P350576  | TNIK        | 2.943372225 | 0.00000695  | down |
| 2732 | A_33_P3319870 | GREM1       | 2.942754112 | 0.00000257  | down |
| 2733 | A_23_P60387   | NOTCH1      | 2.941624777 | 0.002021261 | down |
| 2734 | A_33_P3241984 | PTPN22      | 2.941527927 | 0.0000378   | down |
| 2735 | A_23_P361584  | TMEM154     | 2.939458752 | 0.000347063 | down |
| 2736 | A_23_P50096   | TYMS        | 2.936884101 | 0.00000209  | down |
| 2737 | A_23_P42116   | PPT2        | 2.935354337 | 0.0000301   | down |
| 2738 | A_33_P3294951 | TAS2R30     | 2.935118736 | 0.000512766 | down |
| 2739 | A_24_P148796  | MST1        | 2.934780288 | 0.000011    | down |
| 2740 | A_24_P140204  | PXK         | 2.934068731 | 0.0000809   | down |
| 2741 | A_23_P65230   | TMTC4       | 2.933681668 | 0.0000381   | down |
| 2742 | A_23_P87879   | CD69        | 2.933419429 | 0.003045246 | down |
| 2743 | A_23_P133902  | PSORS1C1    | 2.932631905 | 0.00003     | down |
| 2744 | A_23_P420293  | C11orf45    | 2.932307091 | 0.000000257 | down |
| 2745 | A_23_P121106  | HESX1       | 2.932086638 | 0.000000396 | down |
| 2746 | A_23_P167997  | HIST1H2BG   | 2.931363747 | 0.000000904 | down |
| 2747 | A_24_P4816    | GABARAPL1   | 2.931338687 | 0.0000671   | down |
| 2748 | A_23_P169154  | ERMP1       | 2.929823996 | 0.000000263 | down |
| 2749 | A_24_P260443  | THBS4       | 2.928190877 | 0.0000103   | down |
| 2750 | A_33_P3311076 | CYB5A       | 2.924456102 | 0.00000615  | down |

|      |               |             |             |             |      |
|------|---------------|-------------|-------------|-------------|------|
| 2751 | A_33_P3871347 | SNED1       | 2.921558816 | 0.00000754  | down |
| 2752 | A_33_P3284919 | SEMA6C      | 2.916948133 | 0.000128596 | down |
| 2753 | A_33_P3271651 | HLA-DPB1    | 2.916170152 | 0.000065    | down |
| 2754 | A_33_P3870906 | LOC10050763 | 2.91570609  | 0.002535855 | down |
| 2755 | A_23_P91943   | IL12A       | 2.913332366 | 0.00000129  | down |
| 2756 | A_23_P422732  | WDR63       | 2.912254829 | 0.0000213   | down |
| 2757 | A_23_P118042  | LRRC36      | 2.910030754 | 4.59E-09    | down |
| 2758 | A_23_P59637   | DOCK4       | 2.909752612 | 0.000320937 | down |
| 2759 | A_23_P32021   | FANCC       | 2.90940472  | 0.00000632  | down |
| 2760 | A_23_P105409  | MAP3K12     | 2.907134863 | 0.000376098 | down |
| 2761 | A_23_P323094  | PHC1        | 2.906934706 | 0.00000264  | down |
| 2762 | A_24_P361457  | ENDOV       | 2.905179893 | 0.0000112   | down |
| 2763 | A_24_P362881  | IFT57       | 2.904815902 | 0.000225827 | down |
| 2764 | A_33_P3402056 | LOC389831   | 2.904206759 | 0.00000263  | down |
| 2765 | A_24_P942030  | VAMP4       | 2.903601232 | 0.000101028 | down |
| 2766 | A_32_P155247  | FTL         | 2.902287286 | 0.000000872 | down |
| 2767 | A_32_P40463   | NUDT9P1     | 2.898294641 | 0.0000139   | down |
| 2768 | A_23_P37127   | FOXA1       | 2.896791202 | 0.0000164   | down |
| 2769 | A_24_P226962  | KIAA0368    | 2.892645777 | 0.00000398  | down |
| 2770 | A_33_P3261054 | CCDC114     | 2.891934146 | 0.000000904 | down |
| 2771 | A_32_P56397   | LOC731789   | 2.891584977 | 0.0000895   | down |
| 2772 | A_23_P145424  | KIAA1009    | 2.889158595 | 0.0000217   | down |
| 2773 | A_33_P3229083 | HIST1H2BK   | 2.888383554 | 2.26E-08    | down |
| 2774 | A_24_P216421  | DTNB        | 2.887525059 | 0.016228068 | down |
| 2775 | A_23_P120883  | HMOX1       | 2.88178459  | 0.000210527 | down |
| 2776 | A_23_P434890  | CARD10      | 2.880588003 | 0.000000141 | down |
| 2777 | A_33_P3369393 | NCF1        | 2.879383996 | 0.000451586 | down |
| 2778 | A_33_P3308481 | HYMAI       | 2.877449615 | 0.000153602 | down |
| 2779 | A_24_P251534  | CTDSPL      | 2.87595679  | 0.000152417 | down |
| 2780 | A_23_P14673   | IGDCC4      | 2.875113347 | 0.00000702  | down |
| 2781 | A_33_P3369190 | PAM         | 2.874693877 | 0.000000647 | down |
| 2782 | A_24_P140666  | N4BP3       | 2.874482604 | 0.001159039 | down |
| 2783 | A_33_P3302916 | BACH2       | 2.873733545 | 0.000145885 | down |
| 2784 | A_24_P211565  | C1QTNF6     | 2.872478975 | 0.00000158  | down |
| 2785 | A_33_P3653912 | FAHD2A      | 2.871501868 | 4.93E-09    | down |
| 2786 | A_33_P3274084 | RHBDL3      | 2.871214074 | 0.030046043 | down |
| 2787 | A_24_P231057  | BOD1L       | 2.870035536 | 0.007955023 | down |
| 2788 | A_23_P138717  | RGS10       | 2.869991903 | 0.00000721  | down |
| 2789 | A_23_P119344  | TEAD2       | 2.869258267 | 0.000473971 | down |
| 2790 | A_23_P320739  | MEF2C       | 2.868941532 | 0.000017    | down |
| 2791 | A_23_P147665  | OLFML1      | 2.867260532 | 0.00000381  | down |
| 2792 | A_23_P40217   | DOK5        | 2.864194701 | 0.000038    | down |
| 2793 | A_23_P66948   | FAM59A      | 2.859523113 | 0.0000423   | down |
| 2794 | A_23_P315892  | ST6GALNAC6  | 2.859085968 | 0.001910459 | down |
| 2795 | A_32_P179676  | TOB2        | 2.856992007 | 0.00000553  | down |
| 2796 | A_23_P144622  | GNPDA1      | 2.856248495 | 0.0000196   | down |
| 2797 | A_23_P324523  | IQCK        | 2.85570971  | 0.00000975  | down |
| 2798 | A_33_P3255647 | RPL36A-HNRM | 2.84366628  | 0.025592786 | down |
| 2799 | A_23_P119943  | IGFBP2      | 2.836635277 | 0.000000288 | down |
| 2800 | A_33_P3232319 | LRRD1       | 2.836560955 | 0.0000025   | down |
| 2801 | A_33_P3883985 | LMF1        | 2.833872793 | 0.00000837  | down |



|      |               |           |             |             |      |
|------|---------------|-----------|-------------|-------------|------|
| 2802 | A_24_P93309   | CDNF      | 2.832878578 | 0.00000259  | down |
| 2803 | A_23_P250294  | ABHD5     | 2.831204579 | 0.00000386  | down |
| 2804 | A_24_P205252  | FAM13C    | 2.829090968 | 0.00000757  | down |
| 2805 | A_23_P83579   | ARNT2     | 2.827650214 | 0.000000322 | down |
| 2806 | A_23_P384748  | PLEKHH2   | 2.827011333 | 0.000052    | down |
| 2807 | A_33_P3272209 | MFSD6     | 2.826414064 | 0.0000617   | down |
| 2808 | A_33_P3304963 | LRRRC27   | 2.825754048 | 0.003294836 | down |
| 2809 | A_24_P349196  | CCDC30    | 2.823800826 | 0.00000122  | down |
| 2810 | A_33_P3335740 | FLJ10038  | 2.822924675 | 0.0000868   | down |
| 2811 | A_33_P3274129 | TMEM151B  | 2.822895716 | 0.0000346   | down |
| 2812 | A_23_P82975   | VPS13B    | 2.822399154 | 0.023544914 | down |
| 2813 | A_33_P3244863 | CEP350    | 2.821932214 | 0.000695822 | down |
| 2814 | A_23_P62967   | DISC1     | 2.821676314 | 0.000038    | down |
| 2815 | A_33_P3234015 | LIMD1     | 2.821044323 | 0.00000127  | down |
| 2816 | A_24_P186342  | ZFP14     | 2.819361358 | 0.00000013  | down |
| 2817 | A_33_P3556116 | LOC145678 | 2.819064851 | 0.000197395 | down |
| 2818 | A_23_P4443    | TBX4      | 2.818784983 | 0.000513204 | down |
| 2819 | A_23_P31896   | ST3GAL1   | 2.816792583 | 0.000000116 | down |
| 2820 | A_33_P3296119 | C13orf38  | 2.814845815 | 0.000185553 | down |
| 2821 | A_32_P104478  | FGD6      | 2.813905736 | 0.0000981   | down |
| 2822 | A_23_P216094  | ASPH      | 2.812759105 | 0.020142373 | down |
| 2823 | A_23_P320622  | TTY10     | 2.810787329 | 0.000632391 | down |
| 2824 | A_23_P167983  | HIST1H2AC | 2.807663426 | 0.000051    | down |
| 2825 | A_33_P3263307 | RANGAP1   | 2.804397136 | 0.000000965 | down |
| 2826 | A_24_P239076  | IGLL1     | 2.803842672 | 0.000435035 | down |
| 2827 | A_33_P3234020 | IGDCC3    | 2.802448575 | 0.000101464 | down |
| 2828 | A_33_P3263417 | FLJ43663  | 2.799433287 | 0.000018    | down |
| 2829 | A_33_P3212072 | GORAB     | 2.797733802 | 0.016306904 | down |
| 2830 | A_23_P415061  | FAM104B   | 2.792123908 | 0.00000128  | down |
| 2831 | A_32_P56392   | RBMX      | 2.792095717 | 0.008389484 | down |
| 2832 | A_23_P142738  | TMEM178   | 2.789165097 | 0.0000876   | down |
| 2833 | A_23_P214139  | REV3L     | 2.78878974  | 0.0000304   | down |
| 2834 | A_32_P160896  | FTMT      | 2.788440847 | 0.0000572   | down |
| 2835 | A_23_P205046  | ANKRD10   | 2.787905513 | 0.0000249   | down |
| 2836 | A_23_P349966  | TMEM130   | 2.786396051 | 0.000000034 | down |
| 2837 | A_23_P129425  | TSNAXIP1  | 2.783418421 | 0.000468516 | down |
| 2838 | A_23_P81399   | SQSTM1    | 2.782222565 | 0.00040491  | down |
| 2839 | A_23_P111860  | RADIL     | 2.781898726 | 0.000143834 | down |
| 2840 | A_33_P3260125 | LDLRAD2   | 2.781883621 | 0.002851963 | down |
| 2841 | A_24_P202497  | TWSG1     | 2.781812148 | 0.0000342   | down |
| 2842 | A_23_P34375   | TCEA3     | 2.779113007 | 0.000359353 | down |
| 2843 | A_33_P3329522 | LRRRC17   | 2.778751522 | 0.000000828 | down |
| 2844 | A_24_P380311  | CAMK2A    | 2.778615672 | 0.00000436  | down |
| 2845 | A_23_P432573  | MRGPRF    | 2.777905137 | 0.000164666 | down |
| 2846 | A_23_P133236  | PCDHB14   | 2.776840541 | 0.0000134   | down |
| 2847 | A_33_P3396537 | CDHR4     | 2.77683143  | 0.0000265   | down |
| 2848 | A_32_P175715  | MEIG1     | 2.775968185 | 0.00000673  | down |
| 2849 | A_33_P3271657 | HHIPL1    | 2.773514305 | 0.0000141   | down |
| 2850 | A_23_P168443  | EPHB4     | 2.772705583 | 0.037462185 | down |
| 2851 | A_23_P41854   | CARD6     | 2.770608118 | 0.0000647   | down |
| 2852 | A_23_P48198   | GLT8D2    | 2.77013253  | 0.000000987 | down |

|      |               |             |             |             |      |
|------|---------------|-------------|-------------|-------------|------|
| 2853 | A_24_P365349  | CACNG7      | 2.770005358 | 0.0000699   | down |
| 2854 | A_23_P339818  | ARRDC4      | 2.769697019 | 0.00000469  | down |
| 2855 | A_32_P170444  | SUB1        | 2.769104822 | 0.00000869  | down |
| 2856 | A_24_P381555  | SAP18       | 2.767503548 | 0.0000852   | down |
| 2857 | A_33_P3303259 | PARP4       | 2.767214158 | 0.002822077 | down |
| 2858 | A_23_P502343  | ADAM33      | 2.766038365 | 0.000108407 | down |
| 2859 | A_33_P3235701 | ZCCHC11     | 2.765232653 | 0.001667701 | down |
| 2860 | A_33_P3274462 | LOC643714   | 2.764753388 | 0.000310183 | down |
| 2861 | A_23_P70785   | AIM1        | 2.761849042 | 0.00014703  | down |
| 2862 | A_33_P3362143 | TTC28-AS1   | 2.76083455  | 0.00000621  | down |
| 2863 | A_23_P8013    | HIST1H2BL   | 2.760792896 | 0.000264623 | down |
| 2864 | A_23_P418015  | MAPRE2      | 2.760276263 | 0.0000431   | down |
| 2865 | A_23_P67367   | DHDH        | 2.758435793 | 0.00000513  | down |
| 2866 | A_32_P415151  | WDR27       | 2.758362501 | 0.00000384  | down |
| 2867 | A_33_P3307735 | OPHN1       | 2.75793961  | 0.000057    | down |
| 2868 | A_23_P256205  | ABLIM3      | 2.754548121 | 0.00000689  | down |
| 2869 | A_24_P932594  | ULK2        | 2.754319078 | 0.001973511 | down |
| 2870 | A_24_P706340  | FAM155A     | 2.751571212 | 0.0000241   | down |
| 2871 | A_23_P393686  | C8orf42     | 2.750668788 | 0.003253982 | down |
| 2872 | A_33_P3366082 | EBPL        | 2.750340679 | 0.0000202   | down |
| 2873 | A_24_P277657  | GMPR        | 2.749810372 | 0.00000197  | down |
| 2874 | A_33_P3222917 | CD276       | 2.747711117 | 0.0000418   | down |
| 2875 | A_33_P3288844 | IL6R        | 2.743865314 | 0.000260445 | down |
| 2876 | A_23_P144348  | SLIT2       | 2.742198739 | 0.000443163 | down |
| 2877 | A_23_P93180   | HIST1H2BC   | 2.740767597 | 0.00000105  | down |
| 2878 | A_23_P257834  | ALB         | 2.740034516 | 0.000831522 | down |
| 2879 | A_24_P177948  | DPY19L2     | 2.739263277 | 0.000151816 | down |
| 2880 | A_23_P258190  | AKR1B1      | 2.73841481  | 0.00000858  | down |
| 2881 | A_24_P331560  | STS         | 2.738104674 | 0.0000257   | down |
| 2882 | A_33_P3297003 | LOC647979   | 2.737990992 | 0.001492349 | down |
| 2883 | A_23_P380881  | ANKRD13B    | 2.737784326 | 0.003565887 | down |
| 2884 | A_24_P262201  | SULT1A4     | 2.73727301  | 0.000288442 | down |
| 2885 | A_24_P299911  | PASK        | 2.736810922 | 0.00000506  | down |
| 2886 | A_23_P41765   | IRF1        | 2.732551526 | 0.000163246 | down |
| 2887 | A_33_P3336422 | LOC729013   | 2.730897817 | 0.00000974  | down |
| 2888 | A_33_P3807062 | HJURP       | 2.730260863 | 0.00000855  | down |
| 2889 | A_23_P38206   | LSMD1       | 2.729950767 | 0.003998795 | down |
| 2890 | A_24_P31929   | PRRG1       | 2.727271511 | 0.00000692  | down |
| 2891 | A_23_P255126  | GAB3        | 2.726878588 | 0.0000111   | down |
| 2892 | A_23_P59069   | HIST1H2BO   | 2.726383797 | 0.0000266   | down |
| 2893 | A_24_P67534   | LOC644538   | 2.726096502 | 0.00000527  | down |
| 2894 | A_32_P41496   | LOC10013283 | 2.72604246  | 0.010513302 | down |
| 2895 | A_33_P3250963 | TP53TG1     | 2.725477481 | 0.0000588   | down |
| 2896 | A_33_P3338011 | ZNF480      | 2.724794573 | 0.000146803 | down |
| 2897 | A_33_P3434927 | MAGI2-IT1   | 2.724714998 | 0.000124782 | down |
| 2898 | A_33_P3396444 | PTGR1       | 2.723380001 | 0.000190754 | down |
| 2899 | A_24_P213715  | LOC90834    | 2.722363097 | 0.000278797 | down |
| 2900 | A_24_P943781  | C7orf58     | 2.718159283 | 0.00000548  | down |
| 2901 | A_24_P312041  | PLAGL1      | 2.717910595 | 0.000200099 | down |
| 2902 | A_23_P258124  | ZNF346      | 2.717717564 | 0.000166946 | down |
| 2903 | A_33_P3309481 | PTPRVP      | 2.717369904 | 0.000145172 | down |

|      |               |           |             |             |      |
|------|---------------|-----------|-------------|-------------|------|
| 2904 | A_33_P3332970 | CLEC2B    | 2.715495113 | 0.004008877 | down |
| 2905 | A_23_P134113  | C6orf192  | 2.714521982 | 0.0000374   | down |
| 2906 | A_33_P3266429 | SAMD13    | 2.713198249 | 0.000156961 | down |
| 2907 | A_23_P345928  | C12orf26  | 2.712149427 | 0.0000964   | down |
| 2908 | A_23_P53884   | MAB21L1   | 2.706517407 | 0.000017    | down |
| 2909 | A_33_P3279049 | UPF2      | 2.706194501 | 0.000952176 | down |
| 2910 | A_23_P35995   | CLMP      | 2.706139104 | 0.000520596 | down |
| 2911 | A_23_P154688  | SLC4A11   | 2.705404471 | 0.0000985   | down |
| 2912 | A_23_P356554  | BAG2      | 2.704992324 | 0.00000214  | down |
| 2913 | A_33_P3382856 | DCN       | 2.702613736 | 0.0000351   | down |
| 2914 | A_32_P394951  | NTN5      | 2.702427348 | 0.000000468 | down |
| 2915 | A_23_P132159  | USP18     | 2.701709454 | 9.28E-08    | down |
| 2916 | A_23_P134714  | HRSP12    | 2.701541167 | 0.00000153  | down |
| 2917 | A_23_P354734  | PCDHGA8   | 2.700419733 | 0.0000043   | down |
| 2918 | A_33_P3237944 | AP4M1     | 2.700080025 | 0.009091357 | down |
| 2919 | A_33_P3351510 | IL1RAPL1  | 2.699778597 | 0.00000474  | down |
| 2920 | A_23_P164436  | ASPA      | 2.696066285 | 0.00000322  | down |
| 2921 | A_23_P104073  | S100A3    | 2.695730425 | 0.0000243   | down |
| 2922 | A_23_P147070  | SUN1      | 2.690614868 | 0.000000146 | down |
| 2923 | A_23_P168882  | TP53INP1  | 2.690415508 | 0.0000374   | down |
| 2924 | A_33_P3233005 | MBTD1     | 2.690152452 | 0.000073    | down |
| 2925 | A_33_P3306504 | ISYNA1    | 2.689925096 | 0.000164484 | down |
| 2926 | A_33_P3255544 | RNF130    | 2.689449066 | 0.0000247   | down |
| 2927 | A_23_P106773  | SULT1A2   | 2.689440988 | 0.000000581 | down |
| 2928 | A_23_P111054  | HIST1H2BB | 2.689285644 | 0.000221955 | down |
| 2929 | A_33_P3324428 | AKAP1     | 2.686146208 | 0.000696917 | down |
| 2930 | A_33_P3388958 | SNX32     | 2.685332993 | 0.000000636 | down |
| 2931 | A_24_P468810  | RBBP4     | 2.68226975  | 0.000000996 | down |
| 2932 | A_33_P3243332 | ARHGAP42  | 2.680775611 | 0.0000361   | down |
| 2933 | A_33_P3210492 | C1QTNF4   | 2.679114487 | 0.000164363 | down |
| 2934 | A_32_P232559  | LOC439949 | 2.678949898 | 0.003540042 | down |
| 2935 | A_23_P70968   | HOXA7     | 2.678564618 | 0.0000204   | down |
| 2936 | A_32_P59302   | HIVEP3    | 2.676828232 | 0.000395642 | down |
| 2937 | A_24_P369898  | MYO15B    | 2.676713012 | 0.0000642   | down |
| 2938 | A_24_P220771  | ANKRD17   | 2.676709796 | 0.027282766 | down |
| 2939 | A_24_P122921  | BCL2L11   | 2.673190527 | 0.0000256   | down |
| 2940 | A_23_P129856  | HIC1      | 2.672986714 | 0.00143063  | down |
| 2941 | A_24_P210637  | CHST14    | 2.669649669 | 0.007079888 | down |
| 2942 | A_32_P46594   | LOC145837 | 2.668562252 | 0.00308509  | down |
| 2943 | A_23_P169197  | HSDL2     | 2.666989848 | 3.89E-08    | down |
| 2944 | A_23_P257763  | BOC       | 2.664447549 | 0.000155197 | down |
| 2945 | A_24_P475349  | RAB6B     | 2.663314253 | 0.000262251 | down |
| 2946 | A_33_P3404411 | MIPEP     | 2.663004131 | 7.11E-08    | down |
| 2947 | A_24_P181295  | C14orf37  | 2.662912086 | 0.0000261   | down |
| 2948 | A_33_P3368375 | RANBP3    | 2.662340199 | 0.032427809 | down |
| 2949 | A_33_P3334220 | ACACB     | 2.658973072 | 0.0000303   | down |
| 2950 | A_24_P38276   | FZD1      | 2.656612853 | 0.00000177  | down |
| 2951 | A_23_P113471  | FAAH2     | 2.655697762 | 0.0000134   | down |
| 2952 | A_23_P102611  | WISP2     | 2.653214533 | 0.000287529 | down |
| 2953 | A_24_P802145  | IRS1      | 2.653194303 | 0.000514492 | down |
| 2954 | A_33_P3423445 | ZNF730    | 2.652659867 | 0.000000443 | down |

|      |               |            |             |             |      |
|------|---------------|------------|-------------|-------------|------|
| 2955 | A_24_P314179  | ETS2       | 2.652275548 | 0.0000524   | down |
| 2956 | A_33_P3305487 | REM2       | 2.649352361 | 0.0000253   | down |
| 2957 | A_32_P37592   | SCARNA17   | 2.648940184 | 0.000541637 | down |
| 2958 | A_23_P3956    | C1QTNF1    | 2.648816556 | 0.004921824 | down |
| 2959 | A_23_P256956  | KIF20A     | 2.646577559 | 0.0000365   | down |
| 2960 | A_33_P3462155 | LOC401188  | 2.64627281  | 0.013596119 | down |
| 2961 | A_24_P70117   | DTWD1      | 2.646096483 | 0.0000769   | down |
| 2962 | A_23_P310086  | BEND6      | 2.645026482 | 0.0000731   | down |
| 2963 | A_24_P230540  | RNF212     | 2.642769928 | 0.000624147 | down |
| 2964 | A_23_P125383  | TMEFF2     | 2.64236543  | 0.000236999 | down |
| 2965 | A_33_P3323928 | NCRNA00263 | 2.642197421 | 0.00003     | down |
| 2966 | A_23_P98645   | DCHS1      | 2.64200586  | 0.000847212 | down |
| 2967 | A_23_P214876  | JARID2     | 2.641819074 | 0.000000113 | down |
| 2968 | A_23_P317324  | MECOM      | 2.639544521 | 0.000103207 | down |
| 2969 | A_23_P78037   | CCL7       | 2.637708432 | 0.006067014 | down |
| 2970 | A_23_P42331   | HMGA1      | 2.636813133 | 0.007523224 | down |
| 2971 | A_33_P3347452 | RPS6KA2    | 2.633895912 | 0.0000107   | down |
| 2972 | A_23_P106898  | ORAI3      | 2.63340485  | 0.000162529 | down |
| 2973 | A_23_P72668   | SDPR       | 2.63143088  | 0.0000312   | down |
| 2974 | A_23_P118254  | FOXF1      | 2.629808352 | 0.000000909 | down |
| 2975 | A_23_P321913  | DEF6       | 2.629670245 | 0.0000977   | down |
| 2976 | A_33_P3330498 | ALDH7A1    | 2.62944958  | 0.0000919   | down |
| 2977 | A_33_P3232993 | MARK2      | 2.629119104 | 0.029120889 | down |
| 2978 | A_23_P423427  | FAM171B    | 2.628453903 | 0.00000938  | down |
| 2979 | A_23_P315345  | PIN4       | 2.626678388 | 0.000178759 | down |
| 2980 | A_32_P218355  | C6orf132   | 2.622197649 | 0.000288529 | down |
| 2981 | A_24_P941038  | VSTM4      | 2.620828408 | 0.000663029 | down |
| 2982 | A_24_P248185  | C12orf53   | 2.620603944 | 0.00000239  | down |
| 2983 | A_23_P118815  | BIRC5      | 2.619728252 | 0.000000911 | down |
| 2984 | A_23_P207319  | MAP3K14    | 2.619335148 | 0.00000442  | down |
| 2985 | A_33_P3400374 | PRIC285    | 2.617886712 | 0.0000615   | down |
| 2986 | A_23_P211973  | NEK11      | 2.616854842 | 0.0000183   | down |
| 2987 | A_33_P3715177 | MEGF8      | 2.616430614 | 0.000327335 | down |
| 2988 | A_33_P3218004 | AKR7L      | 2.616174913 | 0.000039    | down |
| 2989 | A_33_P3216227 | ITGB1BP1   | 2.612515929 | 0.0000986   | down |
| 2990 | A_24_P169634  | MBL1P      | 2.611832298 | 0.0000103   | down |
| 2991 | A_23_P118722  | ASGR1      | 2.610338676 | 0.0000613   | down |
| 2992 | A_24_P318593  | SCRN2      | 2.609639336 | 0.011281546 | down |
| 2993 | A_23_P6909    | CCRL1      | 2.609063457 | 0.000263914 | down |
| 2994 | A_33_P3812038 | LOC340335  | 2.607819168 | 0.000312636 | down |
| 2995 | A_24_P406814  | FAM53B     | 2.606900164 | 0.00000429  | down |
| 2996 | A_24_P297539  | UBE2C      | 2.605631742 | 0.00000612  | down |
| 2997 | A_32_P846696  | LOC349196  | 2.604104181 | 0.000434283 | down |
| 2998 | A_23_P110957  | FOXF2      | 2.603006053 | 2.24E-08    | down |
| 2999 | A_23_P75741   | UBE2L6     | 2.601770424 | 0.0001475   | down |
| 3000 | A_23_P165989  | NEURL2     | 2.599838788 | 0.00000341  | down |
| 3001 | A_23_P256158  | ADRA2C     | 2.597876953 | 0.00114486  | down |
| 3002 | A_32_P135348  | TANC1      | 2.59776213  | 0.00000103  | down |
| 3003 | A_33_P3234667 | ZKSCAN1    | 2.595197797 | 0.000232156 | down |
| 3004 | A_23_P124733  | COQ2       | 2.594581463 | 0.000000974 | down |
| 3005 | A_24_P397386  | LIFR       | 2.594276647 | 0.0000282   | down |

|      |               |             |             |             |      |
|------|---------------|-------------|-------------|-------------|------|
| 3006 | A_23_P316812  | AKR7A2P1    | 2.593557041 | 0.000648975 | down |
| 3007 | A_33_P3310293 | PKIG        | 2.593434021 | 0.014425796 | down |
| 3008 | A_33_P3357630 | C12orf71    | 2.592076685 | 0.048582678 | down |
| 3009 | A_23_P210726  | CDC25B      | 2.58957977  | 0.000733503 | down |
| 3010 | A_23_P37778   | FHOD1       | 2.584530689 | 0.000536722 | down |
| 3011 | A_23_P332584  | KIAA1107    | 2.584446074 | 0.000019    | down |
| 3012 | A_23_P76823   | ADSSL1      | 2.583935695 | 0.0000844   | down |
| 3013 | A_33_P3330952 | ATP8A1      | 2.582023265 | 0.0000138   | down |
| 3014 | A_33_P3361546 | TFAP2A      | 2.581652998 | 0.000106384 | down |
| 3015 | A_23_P7684    | CCNJL       | 2.581079479 | 0.00000461  | down |
| 3016 | A_24_P49106   | TCEAL7      | 2.579567146 | 0.0000076   | down |
| 3017 | A_33_P3214491 | PDE4DIP     | 2.577828942 | 0.00225113  | down |
| 3018 | A_24_P63537   | ERAP1       | 2.57762162  | 0.000190722 | down |
| 3019 | A_33_P3268716 | SNX1        | 2.574432005 | 0.00000312  | down |
| 3020 | A_23_P149529  | TACSTD2     | 2.574147756 | 0.000819004 | down |
| 3021 | A_23_P326319  | C16orf45    | 2.574133125 | 0.00000787  | down |
| 3022 | A_32_P8546    | C6orf176    | 2.57266552  | 0.000568485 | down |
| 3023 | A_33_P3272169 | CLIP2       | 2.569676593 | 0.001088121 | down |
| 3024 | A_23_P17855   | TRIOBP      | 2.568386522 | 0.0000279   | down |
| 3025 | A_23_P43273   | EXT1        | 2.56796938  | 0.0000132   | down |
| 3026 | A_24_P405430  | TIA1        | 2.567774183 | 0.00000182  | down |
| 3027 | A_23_P100141  | UNKL        | 2.567115724 | 0.000357902 | down |
| 3028 | A_24_P132518  | IKBKB       | 2.566388947 | 0.000000762 | down |
| 3029 | A_24_P119685  | OBSCN       | 2.565980073 | 0.000003    | down |
| 3030 | A_24_P462853  | NCRNA00202  | 2.565388993 | 0.009323814 | down |
| 3031 | A_23_P366983  | TRHDE       | 2.564869043 | 0.010655366 | down |
| 3032 | A_33_P3213374 | CITED2      | 2.562839859 | 0.015229776 | down |
| 3033 | A_23_P146077  | ZNF395      | 2.562175562 | 0.00000124  | down |
| 3034 | A_23_P154605  | SULF2       | 2.561474448 | 0.0000563   | down |
| 3035 | A_24_P225616  | RRM2        | 2.559899195 | 0.0000687   | down |
| 3036 | A_23_P214658  | PBX2        | 2.559282433 | 0.000249877 | down |
| 3037 | A_32_P116271  | NCRNA00247  | 2.558836676 | 0.00000703  | down |
| 3038 | A_23_P81392   | WWC1        | 2.557642283 | 0.00000413  | down |
| 3039 | A_23_P259741  | SATB1       | 2.557071793 | 0.0000235   | down |
| 3040 | A_23_P126757  | INTS3       | 2.55683489  | 0.00000247  | down |
| 3041 | A_23_P163143  | ACYP1       | 2.556315669 | 0.0000575   | down |
| 3042 | A_24_P350546  | LOC646976   | 2.556168606 | 0.00000491  | down |
| 3043 | A_32_P351968  | HLA-DMB     | 2.556035724 | 0.00000639  | down |
| 3044 | A_23_P121851  | PCDHB15     | 2.55597401  | 0.000000495 | down |
| 3045 | A_23_P42353   | ETV7        | 2.553412107 | 0.0000181   | down |
| 3046 | A_24_P65199   | CDK10       | 2.552455661 | 0.042155544 | down |
| 3047 | A_33_P3290709 | EGFL6       | 2.551584524 | 0.00000265  | down |
| 3048 | A_33_P3306828 | ZNF806      | 2.551446457 | 0.023134716 | down |
| 3049 | A_24_P58122   | USP24       | 2.551436377 | 0.000101202 | down |
| 3050 | A_23_P23783   | MYOC        | 2.551013558 | 0.013611065 | down |
| 3051 | A_23_P106002  | NFKBIA      | 2.550643613 | 0.0000378   | down |
| 3052 | A_33_P3328410 | LOC10029185 | 2.549911896 | 0.0000149   | down |
| 3053 | A_23_P36753   | ALDH2       | 2.547624527 | 7.98E-08    | down |
| 3054 | A_24_P7202    | KIDINS220   | 2.547435585 | 0.000407652 | down |
| 3055 | A_33_P3251841 | DSEL        | 2.546910918 | 0.000728642 | down |
| 3056 | A_24_P854492  | MIAT        | 2.546002201 | 0.0000371   | down |

|      |               |             |             |             |      |
|------|---------------|-------------|-------------|-------------|------|
| 3057 | A_23_P312999  | C4orf22     | 2.545582342 | 0.0000151   | down |
| 3058 | A_32_P25050   | RDH10       | 2.545191132 | 0.000000238 | down |
| 3059 | A_23_P20852   | AUH         | 2.544583734 | 0.0000228   | down |
| 3060 | A_23_P380371  | IPMK        | 2.544069235 | 0.006317174 | down |
| 3061 | A_23_P66432   | TTYH2       | 2.542168632 | 0.0000266   | down |
| 3062 | A_33_P3221064 | LTBP4       | 2.542080118 | 0.00000307  | down |
| 3063 | A_33_P3357979 | CTBP1       | 2.540758054 | 0.019003891 | down |
| 3064 | A_24_P30557   | TBX5        | 2.540647693 | 0.0000482   | down |
| 3065 | A_24_P161018  | PARP14      | 2.539322736 | 0.001559259 | down |
| 3066 | A_23_P160025  | IFI16       | 2.538224187 | 0.000000177 | down |
| 3067 | A_33_P3323298 | JUN         | 2.536341781 | 0.0000346   | down |
| 3068 | A_33_P3381870 | EPB49       | 2.535488094 | 0.0000149   | down |
| 3069 | A_24_P264207  | PTMA        | 2.535158591 | 0.0000806   | down |
| 3070 | A_23_P93311   | DDR1        | 2.533775729 | 0.002959958 | down |
| 3071 | A_23_P14975   | C16orf48    | 2.532700821 | 0.000481696 | down |
| 3072 | A_23_P68851   | KREMEN1     | 2.531991099 | 0.000000261 | down |
| 3073 | A_24_P287473  | SAV1        | 2.531332459 | 1.11E-08    | down |
| 3074 | A_23_P4662    | BCL3        | 2.531287425 | 0.00000953  | down |
| 3075 | A_23_P146325  | ASAP1-IT1   | 2.530715505 | 0.00568355  | down |
| 3076 | A_23_P219084  | ZNF3        | 2.530337804 | 8.47E-09    | down |
| 3077 | A_33_P3280157 | SNORD116-19 | 2.530221641 | 0.000968487 | down |
| 3078 | A_24_P208909  | TRIM2       | 2.529586664 | 0.002121252 | down |
| 3079 | A_23_P94533   | CTSL1       | 2.527937859 | 0.0000785   | down |
| 3080 | A_33_P3440636 | LOC286071   | 2.527834888 | 0.0000649   | down |
| 3081 | A_33_P3376873 | LOC10050970 | 2.527283193 | 0.0000367   | down |
| 3082 | A_23_P366682  | C19orf20    | 2.52641516  | 0.028045568 | down |
| 3083 | A_32_P118568  | RFPL1-AS1   | 2.525550927 | 0.000066    | down |
| 3084 | A_23_P68155   | IFIH1       | 2.524891511 | 0.0000142   | down |
| 3085 | A_32_P221991  | RALGPS1     | 2.521785383 | 0.00000532  | down |
| 3086 | A_33_P3270657 | FAM111B     | 2.521268037 | 0.0000892   | down |
| 3087 | A_23_P128808  | GPR132      | 2.520361482 | 0.00000216  | down |
| 3088 | A_23_P302207  | ZNF853      | 2.519766414 | 0.040952239 | down |
| 3089 | A_33_P3403053 | LOC441242   | 2.518079619 | 0.000599365 | down |
| 3090 | A_24_P922252  | SPATA5L1    | 2.517651567 | 0.001093766 | down |
| 3091 | A_23_P120048  | BAZ2B       | 2.517116517 | 0.000013    | down |
| 3092 | A_33_P3319401 | ARHGAP21    | 2.516815685 | 0.00000203  | down |
| 3093 | A_23_P105144  | SCUBE2      | 2.514591005 | 0.0000509   | down |
| 3094 | A_23_P18684   | CLGN        | 2.51395298  | 0.0000017   | down |
| 3095 | A_33_P3405384 | C8orf45     | 2.513664258 | 0.002012015 | down |
| 3096 | A_23_P112452  | GGTA1P      | 2.513250487 | 0.0000412   | down |
| 3097 | A_23_P68807   | LOC10050987 | 2.512420129 | 0.000151059 | down |
| 3098 | A_32_P29118   | SEMA3D      | 2.507740385 | 0.00000385  | down |
| 3099 | A_33_P3406004 | YBEY        | 2.504780184 | 0.01046039  | down |
| 3100 | A_23_P113613  | CDCP1       | 2.504433955 | 0.000262714 | down |
| 3101 | A_32_P172141  | CDON        | 2.501912093 | 0.0000644   | down |
| 3102 | A_24_P236235  | FLRT2       | 2.501902671 | 0.00045972  | down |
| 3103 | A_24_P256380  | WLS         | 2.501328721 | 0.0000848   | down |
| 3104 | A_33_P3319815 | CXorf28     | 2.49964803  | 0.00030885  | down |
| 3105 | A_33_P3497352 | GRIA4       | 2.497361955 | 0.0000389   | down |
| 3106 | A_23_P24433   | CTSF        | 2.496644369 | 0.00000466  | down |
| 3107 | A_24_P54485   | CCDC115     | 2.496186567 | 0.003429123 | down |

|      |               |             |                   |             |      |
|------|---------------|-------------|-------------------|-------------|------|
| 3108 | A_33_P3398840 | ZBED1       | 2.495882009       | 0.018521591 | down |
| 3109 | A_24_P734953  | TRNP1       | 2.495862863       | 0.000512766 | down |
| 3110 | A_33_P3353030 | UCN         | 2.493541706       | 0.0000604   | down |
| 3111 | A_33_P3251492 | LOC10013366 | 2.493242424       | 0.00008     | down |
| 3112 | A_33_P3361584 | LOC10013093 | 2.492904415       | 0.002004451 | down |
| 3113 | A_33_P3366484 | HIBCH       | 2.492485019       | 0.000416684 | down |
| 3114 | A_23_P357860  | SEC62       | 2.491890199       | 0.000074    | down |
| 3115 | A_23_P17190   | KBTBD10     | 2.491518351       | 0.0000158   | down |
| 3116 | A_23_P67864   | ADCY3       | 2.49077177        | 0.0000089   | down |
| 3117 | A_23_P142849  | RND3        | 2.48891478        | 0.0000751   | down |
| 3118 | A_24_P360529  | PDE7A       | 2.48688995        | 0.000271877 | down |
| 3119 | A_23_P142872  | TCF7L1      | 2.484279793       | 0.0000058   | down |
| 3120 | A_23_P138507  | CDK1        | 2.483082737       | 0.0000639   | down |
| 3121 | A_32_P39003   | LOC10013305 | 2.481854146       | 0.003144229 | down |
| 3122 | A_23_P61180   | PLCXD1      | 2.477425487       | 0.00000275  | down |
| 3123 | A_33_P3321050 | PHACTR2     | 2.476096086       | 0.000765003 | down |
| 3124 | A_32_P133916  | BNC2        | 2.47509174        | 4.12E-08    | down |
| 3125 | A_23_P145965  | TPST1       | 2.475043989       | 0.00000784  | down |
| 3126 | A_23_P337262  | APCDD1      | 2.47297302        | 0.000000209 | down |
| 3127 | A_23_P24157   | PYROXD2     | 2.472069836       | 0.00000574  | down |
| 3128 | A_23_P254801  | PLCG1       | 2.471935729       | 0.006349425 | down |
| 3129 | A_23_P131801  | SGK2        | 2.471818934       | 0.004031797 | down |
| 3130 | A_23_P96641   | PRPS2       | 2.470772251       | 0.006356672 | down |
| 3131 | A_24_P262407  | THRA        | 2.469899489       | 0.015119187 | down |
| 3132 | A_24_P253827  | AP2B1       | 2.46982245        | 0.000855707 | down |
| 3133 | A_24_P456490  | C1orf204    | 2.469438546       | 0.001782033 | down |
| 3134 | A_33_P3296858 | ZNF37BP     | 2.466674241       | 0.000247101 | down |
| 3135 | A_33_P3270019 | NCOA2       | 2.466536323       | 0.000133283 | down |
| 3136 | A_23_P325690  | ANKRD35     | 2.465930262       | 0.0000118   | down |
| 3137 | A_23_P217564  | ACSL4       | 2.465457414       | 0.00000167  | down |
| 3138 | A_23_P65174   | PHF11       | 2.464765397       | 0.0000392   | down |
| 3139 | A_33_P3317576 | DHFRL1      | 2.464466209       | 0.00030101  | down |
| 3140 | A_33_P3403937 | LOC10012939 | 2.462520611       | 0.001332546 | down |
| 3141 | A_24_P88801   | NPHP1       | 2.462422524       | 0.000202136 | down |
| 3142 | A_24_P849801  | RPL22       | 2.460511626       | 0.0000269   | down |
| 3143 | A_33_P3283984 | AFG3L1P     | 2.45903687        | 0.049995957 | down |
| 3144 | A_23_P251421  | CDCA7       | 2.457532791       | 0.0000107   | down |
| 3145 | A_23_P75800   | RAB3IL1     | 2.456382108       | 0.000000295 | down |
| 3146 | A_24_P335092  | SAA1        | 2.455661546       | 0.003634457 | down |
| 3147 | A_23_P88033   | FGF14       | 2.455427683       | 0.000136261 | down |
| 3148 | A_33_P3269636 | SBSN        | 2.455340884       | 0.000000121 | down |
| 3149 | A_23_P148879  | ATP1A2      | 2.454294998       | 0.0000124   | down |
| 3150 | A_23_P61580   | NSUN6       | 2.454234323       | 0.00000395  | down |
| 3151 | A_33_P3232277 | CCNG1       | 2.453724033       | 0.001286106 | down |
| 3152 | A_33_P3257643 | C17orf104   | 2.453038596       | 0.039005199 | down |
| 3153 | A_23_P88559   | LIPC        | 2.453035875       | 0.00000223  | down |
| 3154 | A_32_P180958  | PCYOX1      | 2.449416311       | 0.00000856  | down |
| 3155 | A_24_P408047  | PLEKHA4     | 2.44858283        | 0.0000211   | down |
| 3156 | A_24_P710730  | LOC10017093 | 2.448386525       | 0.000721879 | down |
| 3157 | A_32_P36235   | IER2        | 2.446769165       | 0.00000212  | down |
| 3158 | A_23_P106973  |             | 9-Sep 2.445821866 | 0.000000305 | down |

|      |               |             |             |             |      |
|------|---------------|-------------|-------------|-------------|------|
| 3159 | A_23_P324989  | RECQL5      | 2.445696529 | 0.008229885 | down |
| 3160 | A_33_P3258782 | AP1S2       | 2.443767443 | 0.0000458   | down |
| 3161 | A_33_P3389261 | TMEM194B    | 2.443305055 | 0.000101879 | down |
| 3162 | A_32_P36143   | LOC729088   | 2.442656955 | 0.00000647  | down |
| 3163 | A_33_P3775848 | CLIC2       | 2.442171755 | 0.000000937 | down |
| 3164 | A_23_P170608  | TSPYL2      | 2.440996117 | 0.000889603 | down |
| 3165 | A_33_P3337277 | LOC10012984 | 2.43931206  | 0.0000169   | down |
| 3166 | A_33_P3326545 | LRP5L       | 2.438749032 | 0.0000281   | down |
| 3167 | A_23_P93032   | ZBED3       | 2.436883587 | 0.00000309  | down |
| 3168 | A_33_P3397795 | C14orf135   | 2.430549754 | 0.001262936 | down |
| 3169 | A_24_P678418  | FLJ45244    | 2.428144029 | 0.000644775 | down |
| 3170 | A_23_P161563  | RAB38       | 2.42752104  | 0.00000169  | down |
| 3171 | A_24_P876408  | C11orf95    | 2.427390135 | 0.00000715  | down |
| 3172 | A_24_P873659  | MALAT1      | 2.425619629 | 0.007073799 | down |
| 3173 | A_33_P3240328 | PITX1       | 2.425427406 | 0.000000434 | down |
| 3174 | A_23_P66608   | KAT2A       | 2.425394904 | 0.00000134  | down |
| 3175 | A_23_P129118  | PDCD7       | 2.424071635 | 0.000012    | down |
| 3176 | A_23_P202004  | PRTFDC1     | 2.423285411 | 0.000120046 | down |
| 3177 | A_24_P287043  | IFITM2      | 2.422461102 | 0.000000623 | down |
| 3178 | A_23_P93641   | AKR1B10     | 2.422445822 | 0.00000269  | down |
| 3179 | A_23_P31945   | IL33        | 2.421874096 | 0.0000248   | down |
| 3180 | A_33_P3383233 | NDRG2       | 2.421657775 | 0.00044192  | down |
| 3181 | A_23_P167030  | PTH1R       | 2.421329526 | 0.0000402   | down |
| 3182 | A_33_P3232173 | PSPC1       | 2.420866405 | 0.0000114   | down |
| 3183 | A_24_P924591  | VEZF1       | 2.420415116 | 0.0000031   | down |
| 3184 | A_23_P501547  | ADCY6       | 2.419659988 | 0.020665175 | down |
| 3185 | A_24_P379693  | DNPEP       | 2.419159401 | 0.000615308 | down |
| 3186 | A_24_P58054   | SLC9A8      | 2.418305205 | 0.00000678  | down |
| 3187 | A_23_P211064  | GCFC1       | 2.418020094 | 0.000632521 | down |
| 3188 | A_32_P85676   | STK32B      | 2.417074599 | 0.0000066   | down |
| 3189 | A_24_P190168  | TMEM97      | 2.415249673 | 0.0000338   | down |
| 3190 | A_24_P110141  | DNM1P46     | 2.414828333 | 0.00008     | down |
| 3191 | A_33_P3244424 | SNRPE       | 2.414454874 | 0.000516279 | down |
| 3192 | A_24_P250765  | PRKG1       | 2.414046501 | 0.0000784   | down |
| 3193 | A_23_P64879   | KCNJ8       | 2.413554939 | 0.00000925  | down |
| 3194 | A_33_P3296479 | APP         | 2.412829155 | 0.046312907 | down |
| 3195 | A_23_P127475  | CCS         | 2.411483045 | 0.0000044   | down |
| 3196 | A_33_P3333507 | SENP7       | 2.410890845 | 0.000000943 | down |
| 3197 | A_33_P3335624 | PSMD10      | 2.410742122 | 0.001227538 | down |
| 3198 | A_23_P215744  | CTTNBP2     | 2.410693106 | 0.00000597  | down |
| 3199 | A_23_P417383  | ASPRV1      | 2.40969402  | 0.0000141   | down |
| 3200 | A_23_P327370  | PGPEP1      | 2.409650371 | 0.000292858 | down |
| 3201 | A_33_P3383955 | DDB2        | 2.409532343 | 0.000673882 | down |
| 3202 | A_33_P3214785 | LEPROT      | 2.409520485 | 0.0000161   | down |
| 3203 | A_33_P3325502 | ARHGAP29    | 2.408216783 | 0.000107542 | down |
| 3204 | A_32_P189204  | GAS2L3      | 2.405828717 | 0.004562778 | down |
| 3205 | A_33_P3350343 | MLL         | 2.403820106 | 0.000437225 | down |
| 3206 | A_33_P3314531 | LOC646853   | 2.402947786 | 0.000872193 | down |
| 3207 | A_33_P3713357 | ALCAM       | 2.400625457 | 0.00000659  | down |
| 3208 | A_24_P743802  | ZNF618      | 2.399480353 | 0.000113878 | down |
| 3209 | A_33_P3211634 | PPIL6       | 2.39929386  | 0.000214507 | down |



|      |               |             |             |             |      |
|------|---------------|-------------|-------------|-------------|------|
| 3210 | A_24_P100742  | ADD1        | 2.39922041  | 0.026876508 | down |
| 3211 | A_33_P3234697 | LXN         | 2.399139976 | 0.00000242  | down |
| 3212 | A_33_P3306153 | KIAA1841    | 2.398426563 | 0.000106779 | down |
| 3213 | A_23_P255331  | C4orf49     | 2.398370151 | 0.0000936   | down |
| 3214 | A_32_P110016  | LOC727869   | 2.397206958 | 0.009246075 | down |
| 3215 | A_23_P416751  | ZNF610      | 2.396933693 | 0.0000209   | down |
| 3216 | A_32_P145010  | LOC729683   | 2.396359185 | 0.00000128  | down |
| 3217 | A_23_P43580   | CNTRL       | 2.39579821  | 0.0000444   | down |
| 3218 | A_23_P11081   | AKAP4       | 2.395612226 | 0.012180379 | down |
| 3219 | A_33_P3576317 | LOC340178   | 2.395080921 | 0.044792202 | down |
| 3220 | A_33_P3299882 | UQCRB       | 2.395008872 | 0.000000169 | down |
| 3221 | A_23_P408271  | HSD17B11    | 2.39498065  | 0.000103424 | down |
| 3222 | A_23_P69100   | ARHGEF26    | 2.394879056 | 0.000288095 | down |
| 3223 | A_33_P3257182 | MYBPC2      | 2.39431107  | 0.000248543 | down |
| 3224 | A_33_P3236906 | NCRNA00271  | 2.39397198  | 0.015686138 | down |
| 3225 | A_23_P162120  | NUMA1       | 2.393619223 | 0.027493996 | down |
| 3226 | A_24_P46911   | KCNS2       | 2.392126914 | 0.000000612 | down |
| 3227 | A_33_P3287631 | CTSB        | 2.391239002 | 0.00000365  | down |
| 3228 | A_23_P6223    | SCAF4       | 2.389956456 | 0.002056716 | down |
| 3229 | A_33_P3396344 | LOC728613   | 2.388970049 | 0.00039013  | down |
| 3230 | A_23_P71537   | CSPP1       | 2.387467896 | 0.000000369 | down |
| 3231 | A_24_P334640  | PAQR8       | 2.387429448 | 0.00000338  | down |
| 3232 | A_23_P96041   | TMEM164     | 2.386389166 | 0.0000662   | down |
| 3233 | A_23_P79794   | TGIF2       | 2.385389571 | 0.0000336   | down |
| 3234 | A_24_P32085   | MOBKL2B     | 2.38074142  | 0.000446978 | down |
| 3235 | A_24_P388528  | ST6GAL1     | 2.37971329  | 0.000247055 | down |
| 3236 | A_33_P3220911 | BST2        | 2.378562773 | 0.001002842 | down |
| 3237 | A_24_P374382  | TOP1P2      | 2.378386204 | 0.000608026 | down |
| 3238 | A_33_P3821494 | LOC284939   | 2.377469061 | 0.002394123 | down |
| 3239 | A_33_P3350575 | OC90        | 2.377427973 | 0.019772918 | down |
| 3240 | A_33_P3269359 | SPPL3       | 2.376429056 | 0.0000097   | down |
| 3241 | A_23_P369994  | DCLK1       | 2.375618929 | 0.024516765 | down |
| 3242 | A_33_P3298440 | LOC729324   | 2.374461394 | 0.000000793 | down |
| 3243 | A_23_P164387  | SMARCE1     | 2.373207642 | 0.00000163  | down |
| 3244 | A_23_P109881  | ITIH4       | 2.37306201  | 0.00000466  | down |
| 3245 | A_24_P84008   | LOC10050902 | 2.372897583 | 0.00000741  | down |
| 3246 | A_23_P122579  | DAXX        | 2.372666778 | 0.000122015 | down |
| 3247 | A_33_P3330079 | LOC10012824 | 2.372277696 | 0.011320188 | down |
| 3248 | A_24_P84822   | GUSBP1      | 2.372249907 | 0.001295521 | down |
| 3249 | A_23_P113111  | AR          | 2.37157764  | 0.003387591 | down |
| 3250 | A_23_P162449  | SRGAP1      | 2.370911809 | 0.000196388 | down |
| 3251 | A_23_P50368   | OSCAR       | 2.370416653 | 0.000000365 | down |
| 3252 | A_24_P350759  | SLC1A2      | 2.369818275 | 0.00000965  | down |
| 3253 | A_33_P3299279 | C5orf39     | 2.368508474 | 0.0000776   | down |
| 3254 | A_23_P13929   | NRIP2       | 2.368463819 | 0.000618217 | down |
| 3255 | A_33_P3334630 | PLP1        | 2.367828569 | 0.000672735 | down |
| 3256 | A_24_P62530   | RHOA        | 2.366258027 | 0.0000081   | down |
| 3257 | A_24_P55148   | HIST1H2BJ   | 2.365666493 | 0.00000297  | down |
| 3258 | A_23_P9415    | ACO1        | 2.365371848 | 0.00000256  | down |
| 3259 | A_33_P3353816 | ITGA4       | 2.363831172 | 0.0000102   | down |
| 3260 | A_33_P3384322 | LOC10013200 | 2.362443784 | 0.003104991 | down |

|      |               |              |             |             |      |
|------|---------------|--------------|-------------|-------------|------|
| 3261 | A_33_P3362611 | ELTD1        | 2.362430684 | 0.0000121   | down |
| 3262 | A_23_P328034  | C20orf96     | 2.361709798 | 0.00411596  | down |
| 3263 | A_24_P139901  | GYPC         | 2.360867105 | 0.001226651 | down |
| 3264 | A_24_P203298  | IQUB         | 2.358931186 | 0.0004079   | down |
| 3265 | A_23_P258698  | MANBA        | 2.3584982   | 0.0000291   | down |
| 3266 | A_23_P153767  | AKAP8L       | 2.35787423  | 0.014808789 | down |
| 3267 | A_33_P3306024 | SIGLEC16     | 2.357107135 | 0.0000558   | down |
| 3268 | A_23_P357760  | ARSD         | 2.357099238 | 0.0000242   | down |
| 3269 | A_24_P394368  | WDR19        | 2.356232658 | 0.0000041   | down |
| 3270 | A_23_P217015  | SET          | 2.355182734 | 0.0000286   | down |
| 3271 | A_33_P3236881 | C1orf15-NBL1 | 2.354507525 | 0.0000016   | down |
| 3272 | A_32_P34444   | FHOD3        | 2.354106626 | 0.00000349  | down |
| 3273 | A_23_P204696  | CDKN1B       | 2.353540099 | 0.002320555 | down |
| 3274 | A_23_P28434   | VAMP8        | 2.350547986 | 0.0003057   | down |
| 3275 | A_32_P16854   | ANAPC13      | 2.349761504 | 0.000119269 | down |
| 3276 | A_23_P311740  | CUL9         | 2.349733272 | 0.0000485   | down |
| 3277 | A_24_P174503  | AMT          | 2.349450437 | 0.002810878 | down |
| 3278 | A_23_P363936  | HSPA4L       | 2.348563986 | 0.00000605  | down |
| 3279 | A_33_P3324755 | LOC100128781 | 2.347557074 | 0.000708489 | down |
| 3280 | A_23_P59045   | HIST1H2AE    | 2.346221412 | 0.000026    | down |
| 3281 | A_23_P387630  | STARD8       | 2.345153409 | 0.000191963 | down |
| 3282 | A_33_P3404097 | PGM5P2       | 2.345085733 | 0.002509936 | down |
| 3283 | A_33_P3695899 | FLJ31104     | 2.345001372 | 0.003378995 | down |
| 3284 | A_33_P3246997 | LUC7L3       | 2.344775123 | 0.0001962   | down |
| 3285 | A_24_P346431  | TNS3         | 2.34353607  | 0.0000259   | down |
| 3286 | A_23_P140725  | IFT140       | 2.343440773 | 0.000394385 | down |
| 3287 | A_23_P355439  | HIST1H2AA    | 2.342753774 | 0.000237718 | down |
| 3288 | A_32_P78491   | ETV1         | 2.342683137 | 0.0000458   | down |
| 3289 | A_23_P416395  | STC2         | 2.342189275 | 0.000000183 | down |
| 3290 | A_24_P32887   | BRD3         | 2.341489822 | 0.005103481 | down |
| 3291 | A_33_P3321836 | PLXNB2       | 2.34082108  | 0.030118541 | down |
| 3292 | A_23_P145606  | CHRM2        | 2.340705288 | 0.000312612 | down |
| 3293 | A_23_P86330   | IER5         | 2.33970234  | 0.000000115 | down |
| 3294 | A_23_P18692   | ADH5         | 2.339180192 | 0.000000317 | down |
| 3295 | A_23_P14174   | TNFSF13B     | 2.338094055 | 0.000072    | down |
| 3296 | A_33_P3400828 | NXNL2        | 2.336525906 | 0.001054871 | down |
| 3297 | A_32_P161913  | C1orf70      | 2.336483151 | 0.0000415   | down |
| 3298 | A_23_P254594  | GNRH1        | 2.336473487 | 0.00023048  | down |
| 3299 | A_33_P3263538 | NEAT1        | 2.336253243 | 0.00178986  | down |
| 3300 | A_33_P3344204 | ZDHHC11      | 2.335879361 | 0.000158305 | down |
| 3301 | A_24_P130936  | DDX3Y        | 2.335822531 | 0.01937449  | down |
| 3302 | A_24_P712562  | C17orf67     | 2.333723596 | 0.000102331 | down |
| 3303 | A_33_P3395605 | TMEM119      | 2.332655623 | 0.0000183   | down |
| 3304 | A_23_P118842  | KRTAP1-5     | 2.332553277 | 0.00039843  | down |
| 3305 | A_33_P3382860 | RND2         | 2.331352571 | 0.003456995 | down |
| 3306 | A_23_P155857  | NUDT6        | 2.33099353  | 0.00000123  | down |
| 3307 | A_23_P19816   | RNF32        | 2.330087663 | 0.000595325 | down |
| 3308 | A_23_P64898   | KLRG1        | 2.329456032 | 0.000119156 | down |
| 3309 | A_33_P3407529 | PRRT4        | 2.329085821 | 0.0000842   | down |
| 3310 | A_33_P3248227 | PVT1         | 2.327862212 | 0.0000436   | down |
| 3311 | A_32_P192615  | TAF1         | 2.327121441 | 3.82E-08    | down |

|      |               |             |             |             |      |
|------|---------------|-------------|-------------|-------------|------|
| 3312 | A_33_P3780123 | FLJ33065    | 2.326999122 | 0.000284008 | down |
| 3313 | A_33_P3295056 | PTPRCAP     | 2.326513244 | 0.003847673 | down |
| 3314 | A_23_P41599   | PCDHB8      | 2.326512062 | 0.0000572   | down |
| 3315 | A_33_P3792328 | LSM3        | 2.326263786 | 0.000210595 | down |
| 3316 | A_23_P411851  | C14orf49    | 2.326220842 | 0.011776867 | down |
| 3317 | A_23_P102331  | SCN7A       | 2.32571073  | 0.000137651 | down |
| 3318 | A_33_P3363271 | CACNB2      | 2.325546037 | 0.0000528   | down |
| 3319 | A_33_P3294861 | FLJ40712    | 2.325469901 | 0.00644486  | down |
| 3320 | A_23_P75071   | KIF20B      | 2.324948136 | 0.0000337   | down |
| 3321 | A_23_P84922   | HDAC8       | 2.324273754 | 0.002353589 | down |
| 3322 | A_24_P230176  | CCDC137     | 2.32394759  | 0.042916152 | down |
| 3323 | A_23_P77228   | CRTC3       | 2.323891158 | 0.000511951 | down |
| 3324 | A_33_P3264662 | CYP27C1     | 2.323707588 | 0.000811485 | down |
| 3325 | A_33_P3214199 | ZNF532      | 2.323674945 | 6.04E-08    | down |
| 3326 | A_23_P398530  | WHSC1       | 2.32299578  | 0.001021271 | down |
| 3327 | A_23_P60166   | DEPTOR      | 2.322165023 | 0.00000584  | down |
| 3328 | A_23_P59410   | KIF25       | 2.321719743 | 0.028377738 | down |
| 3329 | A_32_P79483   | LOC283481   | 2.321065281 | 0.000121345 | down |
| 3330 | A_33_P3230548 | KIF14       | 2.320893249 | 0.0000225   | down |
| 3331 | A_33_P3314659 | SPEF2       | 2.320819678 | 0.0000364   | down |
| 3332 | A_33_P3378051 | SESTD1      | 2.320739353 | 0.0000643   | down |
| 3333 | A_23_P333640  | PAPLN       | 2.319304645 | 0.0000785   | down |
| 3334 | A_23_P384056  | CCDC14      | 2.318157625 | 0.00000361  | down |
| 3335 | A_24_P481375  | LOC10013156 | 2.317919827 | 0.002534274 | down |
| 3336 | A_23_P210176  | ITGA6       | 2.31565014  | 0.0000206   | down |
| 3337 | A_23_P335452  | ZCCHC24     | 2.314111961 | 0.0000256   | down |
| 3338 | A_24_P292964  | CDK5RAP3    | 2.312465486 | 0.005105167 | down |
| 3339 | A_23_P215787  | HBP1        | 2.312159624 | 0.0000359   | down |
| 3340 | A_23_P28090   | STX10       | 2.311940603 | 0.01414903  | down |
| 3341 | A_24_P173124  | FLCN        | 2.310763428 | 0.001172997 | down |
| 3342 | A_24_P296508  | SLC43A2     | 2.31028473  | 0.000447639 | down |
| 3343 | A_23_P308673  | TAOK2       | 2.308288154 | 0.000273545 | down |
| 3344 | A_23_P41455   | TRPC3       | 2.306594553 | 0.000137439 | down |
| 3345 | A_23_P206310  | KIAA0513    | 2.305194261 | 0.00000345  | down |
| 3346 | A_33_P3579984 | LOC285147   | 2.304845426 | 0.0000104   | down |
| 3347 | A_23_P104323  | MGMT        | 2.303616669 | 0.0000742   | down |
| 3348 | A_23_P154585  | SNX21       | 2.302692871 | 0.0000426   | down |
| 3349 | A_23_P1912    | ZP1         | 2.302230739 | 0.00000725  | down |
| 3350 | A_24_P943472  | NR1D2       | 2.301910912 | 0.0000323   | down |
| 3351 | A_24_P114249  | GALNT3      | 2.300172034 | 0.00000342  | down |
| 3352 | A_23_P403424  | JMJD7-PLA2G | 2.299516155 | 0.00000747  | down |
| 3353 | A_32_P192474  | PRRT1       | 2.29868535  | 0.0000231   | down |
| 3354 | A_24_P22050   | RAB20       | 2.298506214 | 0.01287018  | down |
| 3355 | A_23_P143662  | PISD        | 2.298070143 | 0.002416262 | down |
| 3356 | A_23_P141092  | TFAP4       | 2.297995384 | 0.0124232   | down |
| 3357 | A_33_P3303372 | PARD3       | 2.295013012 | 0.000171092 | down |
| 3358 | A_33_P3291614 | LOC10013303 | 2.293999643 | 0.008404704 | down |
| 3359 | A_23_P66137   | SOX8        | 2.293582285 | 0.000328335 | down |
| 3360 | A_32_P32413   | SETBP1      | 2.292562926 | 0.0000201   | down |
| 3361 | A_24_P356130  | MAP2K5      | 2.292092076 | 0.004768089 | down |
| 3362 | A_33_P3304293 | STAG2       | 2.290541285 | 0.035423954 | down |

|      |               |             |             |             |      |
|------|---------------|-------------|-------------|-------------|------|
| 3363 | A_23_P122443  | HIST1H1C    | 2.290475027 | 0.0000307   | down |
| 3364 | A_23_P103756  | OVGP1       | 2.289790435 | 0.00000384  | down |
| 3365 | A_33_P3264200 | EGFEM1P     | 2.289033325 | 0.0000916   | down |
| 3366 | A_23_P304682  | EMP2        | 2.287233517 | 0.00000642  | down |
| 3367 | A_23_P408232  | MGC23270    | 2.287053741 | 0.001057946 | down |
| 3368 | A_23_P8754    | AASS        | 2.286994929 | 0.000155581 | down |
| 3369 | A_33_P3267651 | DZIP3       | 2.28655972  | 0.026888608 | down |
| 3370 | A_23_P356004  | KCNIP3      | 2.286012459 | 0.000000441 | down |
| 3371 | A_23_P73114   | PROS1       | 2.285566824 | 0.0000385   | down |
| 3372 | A_24_P497464  | FLJ37644    | 2.285266631 | 0.00020394  | down |
| 3373 | A_33_P3387696 | TMBIM4      | 2.285133313 | 0.0000232   | down |
| 3374 | A_23_P45025   | MAPK10      | 2.284741587 | 0.000280185 | down |
| 3375 | A_23_P26854   | ARHGAP44    | 2.283780295 | 0.0000469   | down |
| 3376 | A_32_P190769  | C1QTNF7     | 2.283027546 | 0.0000853   | down |
| 3377 | A_23_P106835  | BBS2        | 2.281456268 | 0.000033    | down |
| 3378 | A_23_P108294  | PPAP2C      | 2.280800615 | 0.00000597  | down |
| 3379 | A_23_P76109   | RILPL2      | 2.280694695 | 0.0000447   | down |
| 3380 | A_23_P361544  | CES4A       | 2.279421828 | 0.000246748 | down |
| 3381 | A_24_P247106  | AK3         | 2.279313971 | 0.00000482  | down |
| 3382 | A_23_P84872   | SECISBP2    | 2.279098062 | 0.00000632  | down |
| 3383 | A_33_P3228102 | NPHP3       | 2.276983441 | 0.001840158 | down |
| 3384 | A_23_P342709  | FBXO15      | 2.276175661 | 0.000098    | down |
| 3385 | A_23_P130158  | WNT3        | 2.275961521 | 0.000982215 | down |
| 3386 | A_33_P3228435 | FXYD1       | 2.275582671 | 0.0000366   | down |
| 3387 | A_23_P134384  | PHF14       | 2.274734235 | 0.0000428   | down |
| 3388 | A_23_P171255  | IGBP1       | 2.274502993 | 0.00000498  | down |
| 3389 | A_23_P419714  | BTBD11      | 2.273902927 | 0.0000958   | down |
| 3390 | A_33_P3893191 | DBIL5P2     | 2.273396146 | 0.000624152 | down |
| 3391 | A_23_P48339   | IFT88       | 2.272637631 | 0.000000435 | down |
| 3392 | A_33_P3365870 | BSDC1       | 2.272198645 | 0.047151111 | down |
| 3393 | A_23_P115919  | PHYH        | 2.271538357 | 0.00000109  | down |
| 3394 | A_23_P215790  | EGFR        | 2.271122199 | 0.0000866   | down |
| 3395 | A_33_P3271105 | PABPC4      | 2.271003873 | 0.024930997 | down |
| 3396 | A_32_P79434   | PTPRN2      | 2.270155256 | 0.002198269 | down |
| 3397 | A_24_P113131  | BZRAP1      | 2.270053344 | 0.00011187  | down |
| 3398 | A_24_P184305  | BBS1        | 2.269341928 | 0.0000037   | down |
| 3399 | A_23_P134744  | RNF122      | 2.269278275 | 0.000043    | down |
| 3400 | A_24_P588897  | SLCO3A1     | 2.268494403 | 0.000013    | down |
| 3401 | A_23_P91283   | CASS4       | 2.268377786 | 0.0000142   | down |
| 3402 | A_24_P16378   | HGSNAT      | 2.268242728 | 0.007174396 | down |
| 3403 | A_32_P202125  | LOC10012898 | 2.267185128 | 0.000445403 | down |
| 3404 | A_33_P3272105 | FLJ38576    | 2.267153908 | 0.038706218 | down |
| 3405 | A_33_P3345708 | CREB3L4     | 2.265818132 | 0.003900506 | down |
| 3406 | A_24_P202139  | METTL9      | 2.265581411 | 0.0000436   | down |
| 3407 | A_23_P168771  | CCDC146     | 2.265456831 | 0.000523634 | down |
| 3408 | A_33_P3289406 | LOC91450    | 2.263766516 | 0.0000148   | down |
| 3409 | A_33_P3405459 | C20orf195   | 2.262630024 | 0.00000148  | down |
| 3410 | A_23_P53015   | TUT1        | 2.26174576  | 0.032392799 | down |
| 3411 | A_23_P216679  | CDC14B      | 2.261090599 | 0.00000721  | down |
| 3412 | A_23_P156907  | SOBP        | 2.260439022 | 0.0000326   | down |
| 3413 | A_23_P125078  | SLC26A11    | 2.259947879 | 8.64E-08    | down |

|      |               |              |             |             |      |
|------|---------------|--------------|-------------|-------------|------|
| 3414 | A_23_P36985   | PCDH8        | 2.259032459 | 0.000293349 | down |
| 3415 | A_33_P3334292 | PPIAL4G      | 2.258905107 | 0.001850306 | down |
| 3416 | A_32_P507710  | PI4KAP2      | 2.258899366 | 0.01975668  | down |
| 3417 | A_23_P361820  | ATG2A        | 2.258846392 | 0.030322693 | down |
| 3418 | A_24_P145019  | LOC100129851 | 2.258774997 | 0.000912668 | down |
| 3419 | A_24_P145316  | DTNBP1       | 2.258652669 | 0.000189515 | down |
| 3420 | A_24_P49190   | C17orf58     | 2.25837751  | 0.00000129  | down |
| 3421 | A_23_P217899  | CCNL2        | 2.25805741  | 0.0000149   | down |
| 3422 | A_33_P3245412 | RG9MTD3      | 2.257421625 | 0.000012    | down |
| 3423 | A_33_P3315060 | ZC3H11A      | 2.256186925 | 0.001246323 | down |
| 3424 | A_23_P26810   | TP53         | 2.255433631 | 0.000317294 | down |
| 3425 | A_24_P168416  | PRDX2        | 2.254959205 | 0.000702317 | down |
| 3426 | A_32_P170749  | STAG3L2      | 2.254771129 | 0.003283706 | down |
| 3427 | A_24_P289139  | SH3KBP1      | 2.252301036 | 0.046612854 | down |
| 3428 | A_23_P252808  | WBP1         | 2.251165046 | 0.000389121 | down |
| 3429 | A_23_P155765  | HMGB2        | 2.249073278 | 0.0000104   | down |
| 3430 | A_33_P3361771 | TPR          | 2.248917649 | 0.000589748 | down |
| 3431 | A_23_P92928   | C6           | 2.247952316 | 0.005185467 | down |
| 3432 | A_23_P20427   | RHOBTB2      | 2.245952111 | 0.001345472 | down |
| 3433 | A_23_P153941  | CAMKMT       | 2.245638547 | 0.0000338   | down |
| 3434 | A_33_P3347971 | TPD52        | 2.245273927 | 0.000025    | down |
| 3435 | A_23_P54953   | SAP30BP      | 2.245087489 | 0.00000769  | down |
| 3436 | A_33_P3218699 | MDH1B        | 2.244289261 | 0.001001557 | down |
| 3437 | A_23_P99063   | LUM          | 2.242692257 | 0.0000371   | down |
| 3438 | A_32_P52609   | LPIN1        | 2.241941551 | 0.0000419   | down |
| 3439 | A_23_P419213  | KIAA1407     | 2.239429631 | 0.0000334   | down |
| 3440 | A_23_P87545   | IFITM3       | 2.237973572 | 0.000000105 | down |
| 3441 | A_23_P146849  | APBA2        | 2.237733142 | 0.000361832 | down |
| 3442 | A_33_P3676515 | C21orf122    | 2.237163245 | 0.00005     | down |
| 3443 | A_24_P180242  | STIM2        | 2.236336625 | 0.000774188 | down |
| 3444 | A_33_P3417195 | C17orf82     | 2.236173663 | 0.00000315  | down |
| 3445 | A_33_P3337415 | GNAL         | 2.234696022 | 0.000122928 | down |
| 3446 | A_23_P209032  | ZNF302       | 2.234206703 | 0.000130296 | down |
| 3447 | A_33_P3218905 | FAM13AOS     | 2.234078945 | 0.0000332   | down |
| 3448 | A_23_P394917  | SRCAP        | 2.233782728 | 0.035065437 | down |
| 3449 | A_24_P126628  | TMEM194A     | 2.233501928 | 0.00047809  | down |
| 3450 | A_23_P99942   | LRRK1        | 2.23206339  | 0.0000119   | down |
| 3451 | A_24_P390833  | MPPE1        | 2.231148697 | 0.000182429 | down |
| 3452 | A_23_P45917   | CKS1B        | 2.230016936 | 0.000254928 | down |
| 3453 | A_23_P149121  | DIRAS3       | 2.229783543 | 0.0000629   | down |
| 3454 | A_23_P62901   | BTG2         | 2.229441483 | 0.0000117   | down |
| 3455 | A_33_P3262475 | SERP2        | 2.229175651 | 0.02144399  | down |
| 3456 | A_33_P3387831 | CENPM        | 2.228004788 | 0.000000196 | down |
| 3457 | A_33_P3386765 | ABHD14A      | 2.227809181 | 0.0000242   | down |
| 3458 | A_23_P164179  | TOB1         | 2.227583482 | 0.000865305 | down |
| 3459 | A_23_P84189   | PITPNC1      | 2.226910793 | 0.0000168   | down |
| 3460 | A_23_P19243   | AKIRIN2-AS1  | 2.226719603 | 0.0000154   | down |
| 3461 | A_24_P344516  | ZNF702P      | 2.226317778 | 0.000203001 | down |
| 3462 | A_23_P166566  | CCDC48       | 2.225771513 | 0.001016431 | down |
| 3463 | A_23_P88904   | NTHL1        | 2.224413503 | 0.000165169 | down |
| 3464 | A_23_P78782   | CA11         | 2.224310716 | 0.002881801 | down |

|      |               |             |             |             |      |
|------|---------------|-------------|-------------|-------------|------|
| 3465 | A_24_P411749  | GPR126      | 2.224132648 | 0.0000626   | down |
| 3466 | A_32_P49867   | LOC10050705 | 2.22391174  | 0.006664976 | down |
| 3467 | A_23_P419503  | LRRC4B      | 2.223707861 | 0.00133067  | down |
| 3468 | A_23_P150189  | MRE11A      | 2.223181241 | 0.000003    | down |
| 3469 | A_24_P36847   | DHX9        | 2.222413601 | 0.003320374 | down |
| 3470 | A_24_P410086  | SSBP4       | 2.22190659  | 0.001120815 | down |
| 3471 | A_33_P3540725 | FLJ25917    | 2.221533915 | 0.000163005 | down |
| 3472 | A_33_P3685572 | LOC157562   | 2.219886374 | 0.0000268   | down |
| 3473 | A_33_P3732466 | DKFZp547G18 | 2.219252671 | 0.000549284 | down |
| 3474 | A_23_P205697  | DLST        | 2.219143302 | 0.000107895 | down |
| 3475 | A_33_P3288189 | RHOBTB3     | 2.218884132 | 2.04E-08    | down |
| 3476 | A_33_P3233608 | SPANXB2     | 2.218372596 | 0.010846285 | down |
| 3477 | A_32_P77098   | TMEM200B    | 2.217788414 | 0.000503318 | down |
| 3478 | A_33_P3288824 | H2AFB3      | 2.217336969 | 0.0002471   | down |
| 3479 | A_23_P351757  | PLCD3       | 2.217173342 | 0.035489155 | down |
| 3480 | A_24_P5305    | SPG7        | 2.217096399 | 0.029204878 | down |
| 3481 | A_23_P142776  | EIF3F       | 2.216482031 | 0.000696003 | down |
| 3482 | A_23_P126706  | ANGPTL1     | 2.215594251 | 0.000064    | down |
| 3483 | A_33_P3323742 | PNRC2       | 2.213305093 | 0.00000657  | down |
| 3484 | A_33_P3262927 | PCBP4       | 2.212897508 | 0.043471913 | down |
| 3485 | A_24_P82106   | MMP14       | 2.21252159  | 0.032157735 | down |
| 3486 | A_23_P155969  | PLK4        | 2.212000993 | 0.0000158   | down |
| 3487 | A_23_P41344   | EREG        | 2.211764682 | 0.000990327 | down |
| 3488 | A_33_P3415551 | GPAT2       | 2.211490482 | 0.006225476 | down |
| 3489 | A_23_P206661  | NQO1        | 2.210924612 | 0.00032064  | down |
| 3490 | A_33_P3854030 | MBD5        | 2.209584851 | 0.000000823 | down |
| 3491 | A_23_P33984   | TMEM27      | 2.20956106  | 0.0000153   | down |
| 3492 | A_23_P41789   | SLC27A6     | 2.209404899 | 0.001604798 | down |
| 3493 | A_24_P109214  | APOC1       | 2.203870113 | 0.000119756 | down |
| 3494 | A_23_P105619  | TMEM116     | 2.203485394 | 0.000481427 | down |
| 3495 | A_33_P3298159 | PTGDS       | 2.202246306 | 0.00000315  | down |
| 3496 | A_23_P388993  | ZC3H12C     | 2.201170146 | 0.000217446 | down |
| 3497 | A_33_P3293336 | GFRA1       | 2.200466386 | 0.000000205 | down |
| 3498 | A_33_P3360675 | PRKAR1B     | 2.199492477 | 0.000124369 | down |
| 3499 | A_24_P56363   | CAB39L      | 2.198598497 | 0.000107869 | down |
| 3500 | A_23_P65741   | DIS3L       | 2.198068987 | 6.14E-08    | down |
| 3501 | A_24_P98914   | PFKM        | 2.198029629 | 0.0000229   | down |
| 3502 | A_23_P142322  | CIRBP       | 2.197776986 | 0.0000221   | down |
| 3503 | A_24_P132950  | NAP1L4      | 2.196471581 | 0.00000751  | down |
| 3504 | A_33_P3646133 | NFATC2IP    | 2.196000932 | 0.000161957 | down |
| 3505 | A_33_P3265494 | C6orf138    | 2.195941315 | 0.0000836   | down |
| 3506 | A_23_P121499  | WFS1        | 2.195820311 | 0.00000488  | down |
| 3507 | A_23_P369666  | ZMYND8      | 2.194489296 | 0.0000546   | down |
| 3508 | A_23_P114689  | ASAP3       | 2.19419843  | 0.00000371  | down |
| 3509 | A_23_P338325  | ELK3        | 2.192474151 | 0.000000717 | down |
| 3510 | A_23_P302005  | STON1       | 2.191685311 | 0.0000355   | down |
| 3511 | A_23_P45389   | RAB9A       | 2.191548085 | 0.0000232   | down |
| 3512 | A_23_P423197  | RXRA        | 2.190532066 | 0.000104246 | down |
| 3513 | A_33_P3313929 | CCR6        | 2.190396936 | 0.016050906 | down |
| 3514 | A_33_P3789693 | MGC24103    | 2.190257259 | 0.001043339 | down |
| 3515 | A_24_P110780  | C1orf118    | 2.1902523   | 0.000000947 | down |

|      |               |             |             |             |      |
|------|---------------|-------------|-------------|-------------|------|
| 3516 | A_33_P3209537 | EBF4        | 2.190172244 | 0.000000768 | down |
| 3517 | A_23_P80902   | KIF15       | 2.189398649 | 0.00289227  | down |
| 3518 | A_24_P114255  | MBOAT2      | 2.18895101  | 0.0000389   | down |
| 3519 | A_33_P3236340 | LOC10013313 | 2.188646314 | 0.015123048 | down |
| 3520 | A_24_P942017  | LOC10013235 | 2.188266173 | 0.000112641 | down |
| 3521 | A_32_P22078   | RPS9        | 2.185594361 | 0.000066    | down |
| 3522 | A_33_P3361388 | MYCBPAP     | 2.18383451  | 0.002048648 | down |
| 3523 | A_33_P3239849 | GPX1        | 2.183376103 | 0.00000573  | down |
| 3524 | A_23_P110492  | 6-Mar       | 2.182926669 | 0.000266677 | down |
| 3525 | A_24_P236522  | CD2BP2      | 2.181296168 | 0.011870474 | down |
| 3526 | A_33_P3255209 | LOC151162   | 2.180758984 | 0.0000017   | down |
| 3527 | A_33_P3423556 | DPP6        | 2.180572009 | 0.008606983 | down |
| 3528 | A_23_P387184  | NHSL1       | 2.179640344 | 0.0000255   | down |
| 3529 | A_23_P68899   | TXN2        | 2.179178437 | 0.000190396 | down |
| 3530 | A_23_P88602   | MEIS2       | 2.178098955 | 0.0000364   | down |
| 3531 | A_23_P409626  | HNRNPUL2    | 2.178008373 | 0.015886336 | down |
| 3532 | A_23_P97283   | PAQR6       | 2.177711992 | 0.00000021  | down |
| 3533 | A_23_P53557   | LTBR        | 2.177626709 | 0.030790458 | down |
| 3534 | A_23_P385861  | CDCA2       | 2.177255223 | 0.000131436 | down |
| 3535 | A_23_P355455  | TBC1D5      | 2.176945062 | 0.0000434   | down |
| 3536 | A_23_P68505   | C20orf177   | 2.176917147 | 0.000107783 | down |
| 3537 | A_23_P254842  | HDHD1       | 2.176032846 | 0.0000125   | down |
| 3538 | A_24_P105391  | ERMAP       | 2.17555225  | 0.000072    | down |
| 3539 | A_23_P421423  | TNFAIP2     | 2.174900399 | 0.0000458   | down |
| 3540 | A_23_P393645  | ADAMTS13    | 2.173550326 | 0.000000042 | down |
| 3541 | A_23_P26154   | PLIN1       | 2.173256561 | 0.002070265 | down |
| 3542 | A_23_P380928  | ARPC4-TTLL3 | 2.173105676 | 0.0000207   | down |
| 3543 | A_23_P407992  | CRAMP1L     | 2.172882105 | 0.010104196 | down |
| 3544 | A_23_P161297  | OGDHL       | 2.172532361 | 0.005156712 | down |
| 3545 | A_33_P3250083 | NFATC4      | 2.172527843 | 0.0000549   | down |
| 3546 | A_23_P39799   | LOXL3       | 2.1720149   | 0.000000467 | down |
| 3547 | A_23_P201939  | PPM1J       | 2.171935661 | 0.023119917 | down |
| 3548 | A_23_P51187   | PRKCZ       | 2.171591286 | 0.0000921   | down |
| 3549 | A_24_P38347   | DPYSL2      | 2.171247217 | 0.00000333  | down |
| 3550 | A_33_P3321801 | LOC10027221 | 2.170948597 | 0.007165303 | down |
| 3551 | A_33_P3212188 | LRP3        | 2.170256656 | 0.0000372   | down |
| 3552 | A_24_P80204   | MALL        | 2.170252745 | 0.000446269 | down |
| 3553 | A_33_P3338360 | SCARNA13    | 2.169392854 | 0.000417388 | down |
| 3554 | A_23_P207058  | SOCS3       | 2.169129721 | 0.000299096 | down |
| 3555 | A_33_P3244112 | UOX         | 2.168520227 | 0.000449506 | down |
| 3556 | A_23_P67829   | UXS1        | 2.168136869 | 0.00000336  | down |
| 3557 | A_33_P3374878 | FAT4        | 2.167814785 | 0.0000222   | down |
| 3558 | A_23_P105002  | ROM1        | 2.167129951 | 0.00000507  | down |
| 3559 | A_23_P103968  | AKR7A3      | 2.166851572 | 0.0000548   | down |
| 3560 | A_24_P183664  | TRIL        | 2.166778629 | 0.000598255 | down |
| 3561 | A_24_P144773  | RNF145      | 2.166363044 | 0.006617105 | down |
| 3562 | A_33_P3275846 | CACNA1A     | 2.166297925 | 0.0000823   | down |
| 3563 | A_23_P253484  | AADAT       | 2.165885035 | 0.0000354   | down |
| 3564 | A_33_P3381781 | RPRD2       | 2.164962296 | 0.00000321  | down |
| 3565 | A_23_P309381  | HIST2H2AA4  | 2.164321519 | 0.000170501 | down |
| 3566 | A_33_P3340385 | ZNF43       | 2.163449832 | 0.000107845 | down |

|      |               |              |             |             |      |
|------|---------------|--------------|-------------|-------------|------|
| 3567 | A_33_P3416366 | CHAF1A       | 2.163185721 | 0.005723215 | down |
| 3568 | A_23_P202696  | KBTBD4       | 2.162691173 | 0.008749903 | down |
| 3569 | A_24_P337334  | DCTD         | 2.162669437 | 0.0000803   | down |
| 3570 | A_23_P128073  | SMARCC2      | 2.161720997 | 0.000242602 | down |
| 3571 | A_33_P3247392 | TPTE         | 2.161678893 | 0.00066398  | down |
| 3572 | A_33_P3282556 | TMEM204      | 2.160807671 | 0.00000765  | down |
| 3573 | A_23_P151662  | MAX          | 2.160369022 | 0.00000267  | down |
| 3574 | A_23_P389141  | SLFNL1       | 2.159923226 | 0.000305966 | down |
| 3575 | A_33_P3344911 | PTPRQ        | 2.15941286  | 0.0000417   | down |
| 3576 | A_23_P359043  | AKAP2        | 2.159300454 | 0.000624989 | down |
| 3577 | A_23_P410224  | C6orf52      | 2.159159369 | 0.0000136   | down |
| 3578 | A_24_P268160  | DRAM2        | 2.158230071 | 0.0000457   | down |
| 3579 | A_24_P408736  | GALNT5       | 2.156205974 | 0.00000182  | down |
| 3580 | A_23_P350107  | TRIM56       | 2.155707594 | 0.000152593 | down |
| 3581 | A_33_P3474859 | LOC203274    | 2.155651561 | 0.000000127 | down |
| 3582 | A_33_P3386219 | DCLRE1C      | 2.155582033 | 0.00038592  | down |
| 3583 | A_24_P345002  | NUDT11       | 2.154679316 | 0.0000278   | down |
| 3584 | A_24_P400044  | NUDT10       | 2.154309106 | 0.001425793 | down |
| 3585 | A_24_P941922  | CNOT4        | 2.153870732 | 0.000531095 | down |
| 3586 | A_23_P130974  | KIAA1683     | 2.153170652 | 0.000018    | down |
| 3587 | A_24_P366777  | NOTCH2NL     | 2.152983107 | 0.006132131 | down |
| 3588 | A_23_P204052  | PCBP2        | 2.151815424 | 0.009930067 | down |
| 3589 | A_24_P218001  | ZNF273       | 2.150389899 | 0.0000167   | down |
| 3590 | A_33_P3351249 | CXCL16       | 2.149915613 | 4.6E-09     | down |
| 3591 | A_23_P67391   | KPTN         | 2.149887349 | 0.0000217   | down |
| 3592 | A_33_P3312039 | RAD23B       | 2.149150577 | 0.005234706 | down |
| 3593 | A_23_P133807  | TAF8         | 2.149089054 | 0.0015384   | down |
| 3594 | A_24_P136161  | HNRNPCL1     | 2.148460868 | 0.004203063 | down |
| 3595 | A_23_P369456  | SYS1         | 2.147645686 | 0.00000344  | down |
| 3596 | A_23_P57417   | MMP11        | 2.1474745   | 0.000424384 | down |
| 3597 | A_24_P497186  | IRF2BP2      | 2.147383702 | 0.001815473 | down |
| 3598 | A_33_P3628409 | PKI55        | 2.146704083 | 0.000117445 | down |
| 3599 | A_24_P416370  | HOXB4        | 2.145409929 | 0.0000258   | down |
| 3600 | A_33_P3329098 | WTAP         | 2.145076501 | 0.0000331   | down |
| 3601 | A_33_P3824237 | LOC439990    | 2.144102337 | 0.00000698  | down |
| 3602 | A_33_P3244122 | HAAO         | 2.141642984 | 0.0000602   | down |
| 3603 | A_23_P166775  | IL17RC       | 2.139812816 | 0.02012005  | down |
| 3604 | A_33_P3636590 | SUCLG2       | 2.139678195 | 0.000000106 | down |
| 3605 | A_24_P191971  | SAP30L       | 2.138340105 | 0.000159762 | down |
| 3606 | A_24_P211558  | PATZ1        | 2.137911451 | 0.004171733 | down |
| 3607 | A_23_P501538  | HOXA3        | 2.137820169 | 0.00019186  | down |
| 3608 | A_33_P3310552 | FMNL2        | 2.136906918 | 0.000313017 | down |
| 3609 | A_33_P3630129 | FLJ46875     | 2.136685936 | 0.000310941 | down |
| 3610 | A_24_P148450  | UBE2E3       | 2.136599988 | 0.000096    | down |
| 3611 | A_23_P71752   | ZFAND5       | 2.135384204 | 0.00000163  | down |
| 3612 | A_33_P3220663 | STAC3        | 2.135036598 | 0.000777161 | down |
| 3613 | A_24_P262321  | FAM18B2-CDF2 | 2.134302696 | 0.023774877 | down |
| 3614 | A_33_P3436646 | LOC151657    | 2.133477506 | 0.004714878 | down |
| 3615 | A_23_P399797  | SMAD5-AS1    | 2.132990441 | 0.000132149 | down |
| 3616 | A_33_P3372788 | NBPF15       | 2.131779321 | 0.025210474 | down |
| 3617 | A_23_P254768  | HCG4         | 2.131025269 | 0.0000629   | down |



|      |               |           |             |             |      |
|------|---------------|-----------|-------------|-------------|------|
| 3618 | A_33_P3372699 | SEC14L4   | 2.131008627 | 0.00027015  | down |
| 3619 | A_32_P797019  | NPEPL1    | 2.129638808 | 0.003042315 | down |
| 3620 | A_23_P145114  | GCLC      | 2.12906476  | 0.00000835  | down |
| 3621 | A_33_P3640690 | ZEB1      | 2.126838764 | 0.0000248   | down |
| 3622 | A_32_P46981   | HSBP1L1   | 2.125880251 | 0.002066738 | down |
| 3623 | A_33_P3210880 | ATP7A     | 2.125671263 | 0.0000559   | down |
| 3624 | A_33_P3388006 | SPICE1    | 2.125502516 | 0.000151882 | down |
| 3625 | A_33_P3284077 | NUP133    | 2.125491908 | 0.016735389 | down |
| 3626 | A_23_P3602    | NUDT7     | 2.124663694 | 0.000233839 | down |
| 3627 | A_23_P52676   | CATSPER1  | 2.12431317  | 0.001175128 | down |
| 3628 | A_23_P107166  | ACBD4     | 2.123884776 | 0.004432568 | down |
| 3629 | A_23_P47904   | CCDC65    | 2.123130475 | 0.002467164 | down |
| 3630 | A_33_P3370812 | TBC1D1    | 2.123076172 | 0.0000932   | down |
| 3631 | A_24_P148836  | KLHDC8B   | 2.122962175 | 0.020829008 | down |
| 3632 | A_23_P156970  | MEST      | 2.121896077 | 0.00000216  | down |
| 3633 | A_33_P3259373 | PAR1      | 2.121503512 | 0.044315073 | down |
| 3634 | A_24_P219053  | KIAA1704  | 2.120506394 | 0.0000307   | down |
| 3635 | A_23_P87742   | IFFO1     | 2.120135786 | 0.00000657  | down |
| 3636 | A_23_P116614  | ME3       | 2.119614889 | 0.0000906   | down |
| 3637 | A_32_P525524  | ITPRIPL1  | 2.119448092 | 0.003011191 | down |
| 3638 | A_23_P258418  | TNIP2     | 2.117640072 | 0.044806109 | down |
| 3639 | A_23_P17914   | PNPLA3    | 2.117636011 | 0.002040054 | down |
| 3640 | A_33_P3335865 | WDR35     | 2.115891036 | 0.0000838   | down |
| 3641 | A_33_P3389653 | PDE4D     | 2.114552676 | 0.0000205   | down |
| 3642 | A_23_P24135   | TACR2     | 2.114179689 | 0.008575549 | down |
| 3643 | A_23_P207245  | TEKT3     | 2.114155168 | 0.000331064 | down |
| 3644 | A_33_P3383029 | MXI1      | 2.113429274 | 0.000042    | down |
| 3645 | A_23_P24586   | ACCS      | 2.113413941 | 0.0000102   | down |
| 3646 | A_23_P253200  | RPL15     | 2.113038665 | 0.0000389   | down |
| 3647 | A_33_P3244096 | CASK      | 2.112430973 | 0.001063779 | down |
| 3648 | A_33_P3405424 | IL4I1     | 2.112214425 | 0.000691823 | down |
| 3649 | A_24_P13475   | SPATA13   | 2.11199585  | 0.00000876  | down |
| 3650 | A_23_P250302  | CCR3      | 2.111775395 | 0.039534189 | down |
| 3651 | A_33_P3245006 | DAK       | 2.111198162 | 0.0000121   | down |
| 3652 | A_24_P257348  | ARL6IP5   | 2.110527557 | 0.000269488 | down |
| 3653 | A_32_P19539   | TMEM56    | 2.110207498 | 0.0000356   | down |
| 3654 | A_23_P215060  | PODXL     | 2.109810904 | 0.00000266  | down |
| 3655 | A_33_P3330608 | PRAM1     | 2.109497191 | 0.000361754 | down |
| 3656 | A_23_P126623  | PGD       | 2.108547224 | 0.0000135   | down |
| 3657 | A_23_P100420  | ZCCHC14   | 2.107745482 | 0.00000908  | down |
| 3658 | A_24_P54178   | TMED5     | 2.107112487 | 0.0000634   | down |
| 3659 | A_23_P15394   | CD68      | 2.106549135 | 0.000771135 | down |
| 3660 | A_24_P521994  | KLHL24    | 2.105812035 | 0.000000226 | down |
| 3661 | A_24_P381604  | ITM2B     | 2.103988521 | 0.0000541   | down |
| 3662 | A_24_P120115  | CFLAR     | 2.103878757 | 0.000110173 | down |
| 3663 | A_24_P414719  | NFYA      | 2.103862132 | 0.000531222 | down |
| 3664 | A_33_P3530868 | LOC255654 | 2.102774921 | 0.004249864 | down |
| 3665 | A_23_P132910  | RBM47     | 2.101817491 | 0.0000531   | down |
| 3666 | A_32_P195401  | FAM117B   | 2.101200743 | 0.00000186  | down |
| 3667 | A_32_P83465   | NBPF10    | 2.099790411 | 0.001170006 | down |
| 3668 | A_33_P3346073 | SRL       | 2.098947284 | 0.003652293 | down |

|      |               |             |             |             |      |
|------|---------------|-------------|-------------|-------------|------|
| 3669 | A_33_P3406636 | ZFP62       | 2.098925655 | 0.008603565 | down |
| 3670 | A_33_P3328736 | CCDC23      | 2.098736434 | 0.000112751 | down |
| 3671 | A_33_P3256500 | ATXN2       | 2.097662146 | 0.00000284  | down |
| 3672 | A_33_P3379091 | SYNGR1      | 2.097624343 | 0.0000258   | down |
| 3673 | A_24_P237927  | FAM102B     | 2.097028158 | 0.00517497  | down |
| 3674 | A_23_P149992  | PDLIM1      | 2.097010376 | 0.000786375 | down |
| 3675 | A_24_P391574  | LDLRAD3     | 2.095816684 | 0.007954039 | down |
| 3676 | A_23_P500799  | CASP6       | 2.09564377  | 0.00000418  | down |
| 3677 | A_33_P3452003 | LOC143286   | 2.095412628 | 0.001036194 | down |
| 3678 | A_23_P58869   | GSTM2P1     | 2.095320594 | 0.001152571 | down |
| 3679 | A_23_P69908   | GLRX        | 2.094681167 | 0.0000361   | down |
| 3680 | A_24_P911676  | SOX4        | 2.09432475  | 0.000367256 | down |
| 3681 | A_23_P250735  | CBX7        | 2.093781168 | 0.0000452   | down |
| 3682 | A_23_P130376  | FAM38B      | 2.092252107 | 0.000612642 | down |
| 3683 | A_24_P394940  | CYP2E1      | 2.092040769 | 0.00003     | down |
| 3684 | A_33_P3242829 | PKN2        | 2.091635218 | 0.000247019 | down |
| 3685 | A_23_P120125  | COLEC11     | 2.090577848 | 0.0000694   | down |
| 3686 | A_33_P3380311 | ATRX        | 2.090387979 | 0.0000671   | down |
| 3687 | A_24_P317827  | TMEM8B      | 2.089365659 | 0.00000045  | down |
| 3688 | A_33_P3317211 | MECP2       | 2.085979144 | 0.037719743 | down |
| 3689 | A_23_P218784  | DDX17       | 2.085917357 | 0.001454147 | down |
| 3690 | A_23_P4190    | ACSF2       | 2.08474414  | 0.000786053 | down |
| 3691 | A_33_P3214027 | SPECC1L     | 2.084392882 | 0.043492713 | down |
| 3692 | A_23_P392476  | AKD1        | 2.084232854 | 0.001876844 | down |
| 3693 | A_23_P144326  | ASB5        | 2.083401413 | 0.0000258   | down |
| 3694 | A_24_P590560  | RRN3        | 2.083358091 | 0.0000138   | down |
| 3695 | A_33_P3251640 | LOC284440   | 2.083302398 | 0.0000449   | down |
| 3696 | A_23_P320862  | C9orf43     | 2.082938341 | 0.000140967 | down |
| 3697 | A_23_P79496   | STON1-GTF2A | 2.0826753   | 0.00000248  | down |
| 3698 | A_32_P90483   | STXBP4      | 2.082513335 | 0.005729421 | down |
| 3699 | A_33_P3429242 | LOC339988   | 2.082419702 | 0.000138164 | down |
| 3700 | A_32_P138617  | KIAA2018    | 2.081964063 | 0.00000877  | down |
| 3701 | A_33_P3256914 | ITFG3       | 2.081654155 | 0.018103802 | down |
| 3702 | A_23_P5342    | LRP1B       | 2.081562293 | 0.00145057  | down |
| 3703 | A_23_P327156  | LOC645431   | 2.080890716 | 0.000171297 | down |
| 3704 | A_23_P148475  | KIF4A       | 2.080863312 | 0.000819985 | down |
| 3705 | A_33_P3239287 | CHD3        | 2.080523379 | 0.000000685 | down |
| 3706 | A_23_P210948  | UQCC        | 2.080349708 | 0.003600928 | down |
| 3707 | A_23_P117037  | LETMD1      | 2.080308275 | 0.000204012 | down |
| 3708 | A_33_P3316539 | SLC7A2      | 2.080073009 | 0.0000124   | down |
| 3709 | A_23_P213375  | PCDHB2      | 2.079470954 | 0.000103692 | down |
| 3710 | A_32_P539599  | FLJ40852    | 2.079187213 | 0.000177126 | down |
| 3711 | A_24_P784765  | CD59        | 2.078984497 | 0.0000532   | down |
| 3712 | A_23_P141447  | RDM1        | 2.078663025 | 0.00344197  | down |
| 3713 | A_23_P35916   | ATM         | 2.077877591 | 0.00000366  | down |
| 3714 | A_33_P3242973 | IGF2BP2     | 2.077503489 | 0.03269437  | down |
| 3715 | A_23_P11744   | WASH1       | 2.07703952  | 0.000048    | down |
| 3716 | A_33_P3338335 | MIDN        | 2.076658996 | 0.00000633  | down |
| 3717 | A_23_P331928  | CD109       | 2.076445971 | 0.00000824  | down |
| 3718 | A_24_P305938  | RAB9BP1     | 2.076222894 | 0.00000792  | down |
| 3719 | A_23_P19352   | CNPY3       | 2.075874894 | 0.031311204 | down |

|      |               |              |             |             |      |
|------|---------------|--------------|-------------|-------------|------|
| 3720 | A_33_P3735158 | LOC286272    | 2.075501632 | 0.0000238   | down |
| 3721 | A_32_P58614   | KIAA1377     | 2.075110506 | 0.00000413  | down |
| 3722 | A_33_P3250383 | CNP          | 2.073839628 | 0.0000655   | down |
| 3723 | A_32_P72110   | PVR          | 2.073837855 | 0.0000261   | down |
| 3724 | A_33_P3762913 | LOC10021654  | 2.073352093 | 0.0000852   | down |
| 3725 | A_33_P3783235 | LOC286052    | 2.073289627 | 0.000118864 | down |
| 3726 | A_23_P372638  | CHD9         | 2.072900354 | 0.00470017  | down |
| 3727 | A_33_P3245278 | PTPRG        | 2.072811704 | 0.000266727 | down |
| 3728 | A_23_P313632  | FUT8         | 2.072173544 | 0.000478938 | down |
| 3729 | A_32_P167076  | CAPN14       | 2.071406451 | 0.006542919 | down |
| 3730 | A_23_P90099   | TMEM205      | 2.069021065 | 0.0000104   | down |
| 3731 | A_23_P335239  | GAB1         | 2.06899874  | 0.0000554   | down |
| 3732 | A_33_P3347193 | VSTM2A       | 2.068958824 | 0.0000803   | down |
| 3733 | A_33_P3242663 | VASH2        | 2.068360225 | 0.0000218   | down |
| 3734 | A_33_P3257518 | FLJ22447     | 2.067215415 | 0.000537182 | down |
| 3735 | A_32_P6172    | LOC10012882  | 2.066698447 | 0.0000033   | down |
| 3736 | A_32_P225659  | UTS2D        | 2.066399596 | 0.000105955 | down |
| 3737 | A_23_P210608  | ZNF217       | 2.065662656 | 0.000108283 | down |
| 3738 | A_23_P4074    | WDR16        | 2.065398457 | 0.005399679 | down |
| 3739 | A_23_P66719   | DHRS13       | 2.065188257 | 0.012680167 | down |
| 3740 | A_23_P87150   | LPXN         | 2.064993156 | 0.0000548   | down |
| 3741 | A_24_P291133  | UHMK1        | 2.064937525 | 0.000524331 | down |
| 3742 | A_23_P39910   | COA5         | 2.064863385 | 0.0000575   | down |
| 3743 | A_33_P3259960 | LOC10012801  | 2.064104912 | 0.002353272 | down |
| 3744 | A_23_P202219  | CALHM2       | 2.063339661 | 3.63E-08    | down |
| 3745 | A_23_P40588   | HSCB         | 2.063314871 | 0.0000032   | down |
| 3746 | A_23_P163820  | ZNF629       | 2.062863222 | 0.003682852 | down |
| 3747 | A_23_P259955  | GDF5         | 2.062623018 | 0.000115735 | down |
| 3748 | A_33_P3422659 | GDAP1        | 2.062024489 | 0.001692688 | down |
| 3749 | A_33_P3278068 | ELF1         | 2.061658053 | 0.002527235 | down |
| 3750 | A_23_P97932   | MSRB2        | 2.060384607 | 0.0000681   | down |
| 3751 | A_23_P92082   | TKT          | 2.060244177 | 0.000000954 | down |
| 3752 | A_33_P3290338 | PARP1        | 2.059517569 | 0.002828228 | down |
| 3753 | A_23_P145074  | PNRC1        | 2.057209422 | 0.000000626 | down |
| 3754 | A_24_P260639  | HIST1H1D     | 2.056888609 | 0.0000112   | down |
| 3755 | A_24_P73075   | TTC12        | 2.056586852 | 0.000620797 | down |
| 3756 | A_23_P251051  | NF2          | 2.056525556 | 0.0000646   | down |
| 3757 | A_32_P129527  | C6orf70      | 2.055138562 | 0.00000224  | down |
| 3758 | A_24_P181120  | PFDN5        | 2.054802404 | 0.000244509 | down |
| 3759 | A_23_P252740  | DSCC1        | 2.054791247 | 0.000000196 | down |
| 3760 | A_23_P77048   | SLC25A29     | 2.054399372 | 0.000180392 | down |
| 3761 | A_24_P11965   | MRFAP1       | 2.05412266  | 0.01801523  | down |
| 3762 | A_23_P319895  | SETD1B       | 2.054036521 | 0.002815039 | down |
| 3763 | A_33_P3390027 | EXOC7        | 2.053727354 | 0.000643655 | down |
| 3764 | A_24_P94054   | STK4         | 2.053537842 | 0.00090466  | down |
| 3765 | A_23_P216622  | FKTN         | 2.053527831 | 0.0001997   | down |
| 3766 | A_33_P3375613 | C8orf44-SGK3 | 2.052696498 | 0.000046    | down |
| 3767 | A_24_P45367   | NIPAL3       | 2.052093785 | 0.00000994  | down |
| 3768 | A_33_P3415430 | HSPA1B       | 2.051920733 | 0.0000913   | down |
| 3769 | A_33_P3407469 | MYH7B        | 2.051399106 | 0.000415157 | down |
| 3770 | A_24_P75920   | CCDC159      | 2.051343889 | 0.000610352 | down |

|      |               |              |             |             |      |
|------|---------------|--------------|-------------|-------------|------|
| 3771 | A_33_P3341494 | ZNF658       | 2.051024227 | 0.0000556   | down |
| 3772 | A_23_P254081  | LIAS         | 2.050554043 | 0.00000288  | down |
| 3773 | A_23_P218817  | CPT1B        | 2.049716431 | 0.0000469   | down |
| 3774 | A_23_P312610  | DNAJC4       | 2.048662644 | 0.017499566 | down |
| 3775 | A_33_P3317628 | PKP3         | 2.048108673 | 0.0000467   | down |
| 3776 | A_23_P77437   | PRMT7        | 2.04779136  | 0.021114626 | down |
| 3777 | A_32_P486620  | IGSF22       | 2.047622645 | 0.04082469  | down |
| 3778 | A_24_P143686  | KIAA0146     | 2.047115969 | 0.00000245  | down |
| 3779 | A_23_P138139  | OMA1         | 2.045742175 | 0.000144345 | down |
| 3780 | A_32_P175301  | DENND3       | 2.045688291 | 0.0000318   | down |
| 3781 | A_33_P3389113 | TRAF3IP2-AS1 | 2.045447394 | 0.0000162   | down |
| 3782 | A_33_P3312246 | PHIP         | 2.044454563 | 0.0000791   | down |
| 3783 | A_24_P400997  | SMCHD1       | 2.044001611 | 0.013647544 | down |
| 3784 | A_33_P3279059 | RIPK1        | 2.04398272  | 0.000162125 | down |
| 3785 | A_33_P3403107 | PRR19        | 2.04342501  | 0.00006     | down |
| 3786 | A_23_P110879  | TRAF3IP2     | 2.043384501 | 0.003329926 | down |
| 3787 | A_23_P338505  | C19orf40     | 2.043144442 | 0.004495405 | down |
| 3788 | A_23_P23575   | SLC39A1      | 2.042738221 | 0.008283002 | down |
| 3789 | A_33_P3284808 | C10orf112    | 2.042467563 | 0.002523423 | down |
| 3790 | A_33_P3273584 | SCARNA2      | 2.042136592 | 0.013414539 | down |
| 3791 | A_23_P49842   | UNC119       | 2.040315136 | 0.031585829 | down |
| 3792 | A_23_P367676  | SIN3A        | 2.039696736 | 0.001647466 | down |
| 3793 | A_33_P3228023 | SCPEP1       | 2.039178593 | 0.005580238 | down |
| 3794 | A_33_P3722568 | PPP2R3B-AS1  | 2.039081633 | 0.000404519 | down |
| 3795 | A_23_P147450  | SPG21        | 2.038035714 | 0.000125988 | down |
| 3796 | A_23_P1056    | GPR89B       | 2.037771564 | 0.000827804 | down |
| 3797 | A_33_P3247803 | RBM12B       | 2.037374226 | 0.000018    | down |
| 3798 | A_23_P119562  | CFD          | 2.036340288 | 0.000116543 | down |
| 3799 | A_24_P107291  | PPP2R1B      | 2.035094094 | 0.000132402 | down |
| 3800 | A_23_P9289    | RFX3         | 2.033754164 | 0.000123826 | down |
| 3801 | A_24_P102053  | OCLN         | 2.033602581 | 0.0000118   | down |
| 3802 | A_24_P267592  | SAMHD1       | 2.033526324 | 0.000263492 | down |
| 3803 | A_23_P61674   | CLK4         | 2.033252423 | 0.00000969  | down |
| 3804 | A_33_P3387566 | C17orf88     | 2.033074525 | 0.043110118 | down |
| 3805 | A_23_P97606   | GSTM5        | 2.032067042 | 0.0000195   | down |
| 3806 | A_23_P205623  | DDHD1        | 2.031975208 | 0.000000632 | down |
| 3807 | A_33_P3211864 | ARMCX4       | 2.031212953 | 0.000343107 | down |
| 3808 | A_23_P21485   | PID1         | 2.031087182 | 0.000267867 | down |
| 3809 | A_32_P91042   | LOC10012903  | 2.031063952 | 0.0000538   | down |
| 3810 | A_24_P555170  | LOC10050567  | 2.03076514  | 0.001331715 | down |
| 3811 | A_33_P3393801 | PDZK1IP1     | 2.030669987 | 0.01783742  | down |
| 3812 | A_24_P349965  | TCF19        | 2.029787877 | 0.000143866 | down |
| 3813 | A_23_P20494   | NDRG1        | 2.029451693 | 0.00000951  | down |
| 3814 | A_24_P179816  | SLC27A3      | 2.029356977 | 0.000000232 | down |
| 3815 | A_33_P3332487 | FANK1        | 2.028878071 | 0.0000349   | down |
| 3816 | A_23_P368484  | C17orf76     | 2.028599266 | 0.0000117   | down |
| 3817 | A_23_P25348   | ACAD10       | 2.027737499 | 0.030339458 | down |
| 3818 | A_24_P227831  | ABCC1        | 2.02758866  | 0.000978557 | down |
| 3819 | A_23_P36700   | TAPBPL       | 2.02747904  | 0.000271603 | down |
| 3820 | A_33_P3359368 | DHRS4L1      | 2.027124878 | 0.001391435 | down |
| 3821 | A_23_P92754   | FGFR4        | 2.026958428 | 0.001391476 | down |

|      |               |              |             |             |      |
|------|---------------|--------------|-------------|-------------|------|
| 3822 | A_24_P291826  | SYTL3        | 2.026364161 | 0.0000835   | down |
| 3823 | A_33_P3348061 | CABP7        | 2.026056116 | 0.0000373   | down |
| 3824 | A_23_P257478  | CYP21A2      | 2.026004109 | 0.0000401   | down |
| 3825 | A_24_P143138  | FGD1         | 2.025982436 | 0.01542201  | down |
| 3826 | A_23_P329890  | TMEM136      | 2.025668364 | 0.00021176  | down |
| 3827 | A_33_P3320197 | FAM150B      | 2.025623902 | 0.000405552 | down |
| 3828 | A_33_P3316323 | RBMS1        | 2.025620626 | 0.000110262 | down |
| 3829 | A_24_P68019   | ZNF551       | 2.025498945 | 0.000395407 | down |
| 3830 | A_24_P702813  | XPR1         | 2.025478119 | 0.0000411   | down |
| 3831 | A_23_P102607  | CHD6         | 2.025309137 | 0.00024154  | down |
| 3832 | A_33_P3355071 | MLLT10       | 2.025015335 | 0.0000578   | down |
| 3833 | A_33_P3286724 | PLD2         | 2.024776264 | 0.000254025 | down |
| 3834 | A_23_P218358  | FBXW10       | 2.024428514 | 0.000097    | down |
| 3835 | A_23_P70566   | FKBPL        | 2.024424772 | 0.002412449 | down |
| 3836 | A_24_P396753  | TRIB2        | 2.024383565 | 0.000104803 | down |
| 3837 | A_24_P231104  | LEPR         | 2.0243403   | 0.0000513   | down |
| 3838 | A_23_P370989  | MCM4         | 2.024255878 | 0.0000991   | down |
| 3839 | A_33_P3347055 | LOC100130961 | 2.021484769 | 0.001662884 | down |
| 3840 | A_23_P322845  | PPAPDC1B     | 2.021286978 | 0.0000862   | down |
| 3841 | A_24_P82142   | TCF12        | 2.019170634 | 0.000262953 | down |
| 3842 | A_23_P122615  | PNISR        | 2.019043276 | 0.00000165  | down |
| 3843 | A_23_P319859  | EYA2         | 2.018672257 | 0.000183953 | down |
| 3844 | A_23_P428184  | HIST1H2AD    | 2.018461636 | 0.0000573   | down |
| 3845 | A_23_P116743  | LOC338799    | 2.017342907 | 4.46E-08    | down |
| 3846 | A_32_P129894  | MEGF9        | 2.016801831 | 0.000106846 | down |
| 3847 | A_33_P3299314 | RPL28        | 2.01664387  | 0.0000579   | down |
| 3848 | A_33_P3319880 | EVC2         | 2.01652366  | 0.02504029  | down |
| 3849 | A_23_P147109  | C9orf167     | 2.016301897 | 0.000520507 | down |
| 3850 | A_33_P3413114 | ADAMTSL1     | 2.015775538 | 0.000017    | down |
| 3851 | A_23_P4353    | WSB1         | 2.015694035 | 0.005271622 | down |
| 3852 | A_24_P98555   | FAM45A       | 2.015267011 | 0.000000722 | down |
| 3853 | A_33_P3357163 | PPIEL        | 2.014923316 | 0.000224065 | down |
| 3854 | A_24_P173823  | PBX1         | 2.014587312 | 0.00000619  | down |
| 3855 | A_33_P3335735 | LOC10012897  | 2.014517912 | 0.000033    | down |
| 3856 | A_23_P323166  | SRRM2        | 2.01394786  | 0.00000922  | down |
| 3857 | A_33_P3290443 | SCARNA9      | 2.013247023 | 0.016253697 | down |
| 3858 | A_23_P109907  | ILDR1        | 2.012802566 | 0.0000127   | down |
| 3859 | A_24_P160680  | CCDC40       | 2.012437809 | 0.000201781 | down |
| 3860 | A_24_P169148  | HMGB1        | 2.01237011  | 0.000193207 | down |
| 3861 | A_24_P612446  | C6orf89      | 2.011901489 | 0.039270938 | down |
| 3862 | A_33_P3239112 | PTCH1        | 2.011496276 | 0.000140621 | down |
| 3863 | A_33_P3236698 | ANKRD19P     | 2.011248251 | 0.0000232   | down |
| 3864 | A_33_P3414362 | USP32        | 2.011160983 | 0.000383975 | down |
| 3865 | A_23_P17103   | TSGA10       | 2.010777383 | 0.000752101 | down |
| 3866 | A_23_P350719  | PRSS30P      | 2.010643493 | 0.000106239 | down |
| 3867 | A_33_P3299834 | POLR2E       | 2.010140533 | 0.00000487  | down |
| 3868 | A_32_P181297  | ST7-AS1      | 2.010107976 | 0.00000261  | down |
| 3869 | A_23_P360542  | C18orf2      | 2.010006918 | 0.009150844 | down |
| 3870 | A_23_P214222  | MARCKS       | 2.009992335 | 0.00000106  | down |
| 3871 | A_23_P166135  | XRN2         | 2.0099654   | 0.0000592   | down |
| 3872 | A_23_P39185   | RDH13        | 2.009816379 | 0.02458483  | down |

|      |               |             |             |             |      |
|------|---------------|-------------|-------------|-------------|------|
| 3873 | A_23_P143569  | DGCR6L      | 2.009558162 | 0.011838055 | down |
| 3874 | A_33_P3380405 | CYTH1       | 2.008865025 | 0.033317377 | down |
| 3875 | A_33_P3263392 | LOC729696   | 2.008778046 | 0.000228671 | down |
| 3876 | A_24_P317762  | LY6E        | 2.006807637 | 0.044163039 | down |
| 3877 | A_24_P158718  | DTX4        | 2.005897842 | 0.0000183   | down |
| 3878 | A_24_P921155  | C3orf17     | 2.005647867 | 0.0000357   | down |
| 3879 | A_23_P92994   | MFF         | 2.005129386 | 0.000000489 | down |
| 3880 | A_24_P935682  | LOC10013154 | 2.004575376 | 0.002555702 | down |
| 3881 | A_23_P106737  | LUC7L       | 2.003931925 | 0.016014526 | down |
| 3882 | A_24_P316305  | AQR         | 2.003669186 | 0.000300344 | down |
| 3883 | A_33_P3383422 | DHRS4       | 2.003400649 | 0.004894112 | down |
| 3884 | A_23_P254025  | ZFP37       | 2.003202452 | 0.0000488   | down |
| 3885 | A_32_P149060  | C21orf71    | 2.003068974 | 0.000157207 | down |
| 3886 | A_33_P3829391 | LOC641510   | 2.002812271 | 0.000137203 | down |
| 3887 | A_23_P40880   | CMTM8       | 2.002273381 | 0.00000217  | down |
| 3888 | A_23_P130149  | ENO3        | 2.001314639 | 0.000107755 | down |
| 3889 | A_33_P3212102 | SLC10A6     | 2.00121     | 0.028739605 | down |
| 3890 | A_33_P3347161 | TBL1X       | 2.000970873 | 0.000224527 | down |
| 3891 | A_24_P926400  | GGA1        | 2.000931899 | 0.00000657  | down |
| 3892 | A_23_P37441   | B2M         | 2.000704362 | 0.000000495 | down |
| 3893 | A_23_P365719  | TAPBP       | 2.000681018 | 0.000581966 | down |
| 3894 | A_33_P3238636 | C2orf77     | 2.000660956 | 0.000843278 | down |

---

**Supplementary Table S3 Five overlapping genes between top 50 up-regulated genes in silica-exposed NR8383 cells and top 50 up-regulated genes in TGF- $\beta$ -stimulated WI-38 cells**

| No. | Gene Name | Fold change in NR8383 cells | Fold change in WI-38 cells |
|-----|-----------|-----------------------------|----------------------------|
| 1   | IER3      | 9.50                        | 23.37                      |
| 2   | MLLT11    | 6.63                        | 21.76                      |
| 3   | TAK1      | 45.51                       | 21.65                      |
| 4   | IL6       | 60.16                       | 21.11                      |
| 5   | NACC2     | 5.28                        | 17.46                      |

**Supplementary Table S4 Clinical features of pneumoconiosis patients and control individuals**

| No. | Age | Gender | Working history        | Pathological Diagnosis    | ILO Classification              | Other lung diseases | Smoking         |
|-----|-----|--------|------------------------|---------------------------|---------------------------------|---------------------|-----------------|
| 1   | 54  | Male   | Drill and construction | Pneumoconiosis, Stage II  | Large Parenchymal Opacities (A) | No                  | No              |
| 2   | 50  | Male   | Drill and construction | Pneumoconiosis, Stage III | Large Parenchymal Opacities (B) | No                  | Stopped in 2002 |
| 3   | 46  | Male   | Drill and construction | Pneumoconiosis, Stage II  | Large Parenchymal Opacities (A) | No                  | Stopped in 2004 |
| 4   | 52  | Male   | Construction           | Pneumoconiosis, Stage I   | Small Parenchymal Opacities (t) | No                  | No              |
| 5   | 48  | Male   | Drill and construction | Pneumoconiosis, Stage II  | Large Parenchymal Opacities (A) | No                  | Stopped in 2010 |
| 6   | 61  | Male   | Coal worker            | Pneumoconiosis, Stage III | Large Parenchymal Opacities (B) | No                  | No              |
| 7   | 55  | Male   | Drill                  | Pneumoconiosis, Stage II  | Large Parenchymal Opacities (A) | No                  | No              |
| 8   | 49  | Male   | Construction           | Pneumoconiosis, Stage I   | Small Parenchymal Opacities (u) | No                  | No              |
| 9   | 57  | Male   | Construction and drill | Pneumoconiosis, Stage II  | Large Parenchymal Opacities (B) | No                  | No              |
| 10  | 48  | Male   | N.A.                   | Pulmonary contusion       | N.A.                            | No                  | No              |
| 11  | 37  | Male   | N.A.                   | Hemothorax by trauma      | N.A.                            | No                  | No              |
| 12  | 52  | Male   | N.A.                   | Pneumothorax by trauma    | N.A.                            | No                  | No              |
| 13  | 43  | Male   | N.A.                   | Pneumothorax by trauma    | N.A.                            | No                  | No              |
| 14  | 53  | Male   | N.A.                   | Atelectasis               | N.A.                            | No                  | No              |
| 15  | 55  | Male   | N.A.                   | Pulmonary contusion       | N.A.                            | No                  | No              |

ILO Classification: International Labour Organization (ILO) International Classification of Radiographs of Pneumoconioses.



**Supplementary Table S5 Top 30 small molecules selected from TAK1-based molecular docking**

| Rank | Molecules    | Affinity | LipinskiScore | LeadScore | LipinskiScore2 | LeadScore2 |
|------|--------------|----------|---------------|-----------|----------------|------------|
| 1    | ZINC13542876 | -8.3     | 7             | 5         | 6              | 6          |
| 2    | ZINC01561462 | -8.2     | 7             | 5         | 6              | 6          |
| 3    | ZINC29589879 | -8       | 7             | 5         | 6              | 6          |
| 4    | ZINC13125795 | -8       | 7             | 5         | 6              | 6          |
| 5    | ZINC05647206 | -8       | 7             | 5         | 6              | 6          |
| 6    | ZINC00041118 | -7.9     | 7             | 5         | 6              | 6          |
| 7    | ZINC13152217 | -7.8     | 7             | 5         | 6              | 6          |
| 8    | ZINC03258337 | -7.8     | 7             | 5         | 6              | 6          |
| 9    | ZINC29589876 | -7.7     | 7             | 5         | 6              | 6          |
| 10   | ZINC01688628 | -7.7     | 7             | 5         | 6              | 6          |
| 11   | ZINC13130016 | -7.7     | 7             | 5         | 6              | 6          |
| 12   | ZINC04934182 | -7.5     | 7             | 5         | 6              | 6          |
| 13   | ZINC01697110 | -7.5     | 7             | 5         | 6              | 6          |
| 14   | ZINC01676213 | -7.4     | 7             | 5         | 6              | 6          |
| 15   | ZINC01729467 | -7.4     | 7             | 5         | 6              | 6          |
| 16   | ZINC02042811 | -7.4     | 7             | 5         | 6              | 6          |
| 17   | ZINC00006787 | -7.3     | 7             | 5         | 6              | 6          |
| 18   | ZINC00563913 | -7.3     | 7             | 5         | 6              | 6          |
| 19   | ZINC05392913 | -7.3     | 7             | 5         | 6              | 6          |
| 20   | ZINC01653222 | -7.2     | 7             | 5         | 6              | 6          |
| 21   | ZINC01724376 | -7.2     | 7             | 5         | 6              | 6          |
| 22   | ZINC00076793 | -7.2     | 7             | 5         | 6              | 6          |
| 23   | ZINC18117772 | -7.2     | 7             | 5         | 6              | 6          |
| 24   | ZINC01754899 | -7.2     | 7             | 5         | 6              | 6          |
| 25   | ZINC29589877 | -7.2     | 7             | 5         | 6              | 6          |
| 26   | ZINC00387464 | -7.2     | 7             | 5         | 6              | 6          |
| 27   | ZINC29589797 | -7.2     | 7             | 5         | 6              | 6          |
| 28   | ZINC04715161 | -7.2     | 7             | 5         | 6              | 6          |

|    |              |      |   |   |   |   |
|----|--------------|------|---|---|---|---|
| 29 | ZINC03954626 | -7.1 | 7 | 5 | 6 | 6 |
| 30 | ZINC18847035 | -7.1 | 7 | 5 | 6 | 6 |

---

**Supplementary Table S6 Primers used in real-time PCR**

| No. | Genes  | Forward primer          | Reverse primer           |
|-----|--------|-------------------------|--------------------------|
| 1   | IER3   | CAGCCGCAGGGTTCTCTAC     | GATCTGGCAGAAGACGATGGT    |
| 2   | MLLT11 | GGACCCTGTGAGTAGCCAGTA   | CAGCTCCGACAGATCCAGT      |
| 3   | TAK1   | ATTGTAGAGCTTCGGCAGTTATC | CTGTAAACACCAACTCATTGCG   |
| 4   | IL6    | ACTCACCTCTTCAGAACGAATTG | CCATCTTTGGAAGGTTTCAGGTTG |
| 5   | NACC2  | CGGCACCGACCTCATGTTC     | CTTCATGCTTTACTCGGGTCAG   |
| 6   | GAPDH  | GGAGCGAGATCCCTCCAAAAT   | GGCTGTTGTCATACTTCTCATGG  |
